# Supplementary material for: Are Africans, Europeans, and Asians Different “Races”? A Guided-Inquiry Lab for Introducing Undergraduate Students to Genetic Diversity and Preparing Them to Study Natural Selection
Source: Atypon-hosted journal article supplement (doi:10.1187/cbe.11-09-0087), 2012-06-01
Supplement: combinedsupmats1.pdf [file combinedsupmats1.pdf]

#AFRICA Biaka

CCACAGTTTATGTAGCTTACCTCCTCAAAGCAATACACTGAAAATGTTTGTAGACGGGCTCACATCACCCCATAAACAAATA  
GGTTTGGTCCTAGCCTTTCTATTAGCTCTTAGTAAGATTA  
CACATGCAAGCATCCCCGTTCCAGTGAGTTACCCCTCTAAATCACCACGATCAAAGGGACAAGCATCAAGCACGCAACA  
ATGCAGCTCAAACGCTTAGCCTAGCCACACCCCCACGGG  
AAACAGCAGTGATAAACCTTTAGCAATAAACGAAAGTTTAACTAAGCTATACTAACCCAGGGTGGTCAATTTTCGTGCC  
AGCCACCGCGGTACACGATTAACCCAAGTCAATAGAAGC  
CGGCGTAAAGAGTGTTTTAGATCACCCCTCCCCAATAAAGCTAAAACCTCACCTGAGTTGTAAAAAATCCAGTTGACAC  
AAAATAAACTACGAAAGTGGCTTTAACATATCTGAACACA  
CAATAGCTAAGACCCAAACTGGGATTAGATACCCCACTATGCTTAGCCCTAAACCTCAACAGTTAAATCAACAAAATGC  
TCGCCAGAACACTACGAGCCACAGCTTAAAACCTCAAAGGA  
CCTGGCGGTGCTTCATATCCCTCTAGAGGAGCCTGTTCTGTAATCGATAAACCCCGATCAACCTCACCCCTCTTGCTCA  
GCCTATATACCGCCATCTTCAGCAAACCTGATGAAGGCT  
ACAAAGTAAGCGCAAGTACCCACGTAAAGACGTTAGGTCAAGGTGTAGCCCATGAGGTGGCAAGAAATGGGCTACATTTT  
CTACCCAGAAAATACGATAGCCCTTATGAAACTTAAGG  
GTCGAAGGTGGATTTAGCAGTAAACTGAGAGTAGAGTGCTTAGTTGAACAGGGCCCTGAAGCGGTACACACCGCCCGTC  
ACCCTCCTCAAGTATACTTCAAAGGACATTTAACTAAAAC  
CCCTACGCATTTATATAGAGGAGACAAGTCGTAACATGGTAAGTGTACTGGAAAGTGCCTTGGACGAACCAGAGTGTAG  
CTTAACACAAAGCACCCAACCTTACACTTAGGAGATTTCAA  
CTTAACTTGACCGCTCTGAGCTAAACCTAGCCCCAAACCCACTCCACCTTACTACCAGACAACCTTAGCCAAACCATTTA  
CCCCAATAAAGTATAGGCGATAGAAATTGAAACCTGGCGC  
AATAGATATAGTACCGCAAGGGAAAGATGAAAAATTATAACCAAGCATAATATAGCAAGGACTAACCCCTATACCTTCTG  
CATAATGAATTAAGTAAATAAATTTGCAAGGAGAGCCA  
AAGCTAAGACCCCCGAAACCAGACGAGCTACCTAAGAACAGCTAAAAGAGCACACCCCGTCTATGTAGCAAAATAGTGGGA  
AGATTTATAGGTAGAGGCGACAAACCTACCGAGCCTGGTG  
ATAGCTGGTTGTCCAAGATAGAATCTTAGTTCAACTTTAAATTTGCCACAGAACCCTCTAAATCCCCTTGTAATTTAA  
CTGTTAGTCCAAAGAGGAACAGCTCTTTGGACACTAGGAA  
AAAACCTTGTAGAGAGAGTAAAAAA-  
TTTAAACCCCATAGTAGGCCTAAAAGCAGCCACCAATTAAGAAAGCGTTCAAGCTCAACACCCACTACCTAAAAAA-  
TCCCAAACATATAACTG  
AACTCCTCACACCCAATTGGACCAATCTATCACCCCTATAGAAGAATAATGTTAGTATGAGTAACATGAAAACATTCTCC  
TCCGCATAAGCCTGCGTCAGATTAAAACACTGAACTGACA  
ATTAACAGCCCAATATCTACAATCA-  
CCAACAAGTCATTATTACCCTCACTGTCAACCCAACACAGGCATGCTCATAAGGAAAGGTTAAAAAAGTAAAAGGAACT  
CGGCAAATCTTACC  
CCGCTGTTTACCAAAAACATCACCTCTAGCATCACAGTATTAGAGGCACCGCCTGCCAGTGACACATGTTTAAACGGC  
CGCGGTACCCTAACCGTGCAAAGGTAGCATAATCACTTGT  
TCCTTAAATAGGGACCTGTATGAATGGCTCCACGAGGGTTGAGCTGTCTCTTACTTTTAAACCAGTGAAATTGACCTGCC  
GTGAAGAGGCGGGCATGACACAGCAAGACGAGAAGACCT  
ATGGAGCTTTAATTTATTAATGCAAAACAATACCTAACAAACCCACAGGTCTTAACTACCAAACCTGCATTAATAATTTT  
GGTTGGGGCGACCTCGGAGCAGAACCCAACCTCCGAGCAG  
TACATGCTAAGACTTCACCAGTCAAAGCGAACTACCATACTCAATTGATCCAATAACTTGACCAACGGAACAAGTTACCC  
TAGGGATAACAGCGCAATCCTATTCTAGAGTCCATATCAA  
CAATAGGGTTTACGACCTCGATGTTGGATCAGGACATCCCGATGGTGCAGCCGCTATTAAGGTTTCGTTTGTTCACGAT  
TAAAGTCTACGTGATCTGAGTTGAGACCGGAGTAATCCA  
GGTCGGTTTTCTATCTACTTCAAATTCCTCCCTGTACGAAAGGACAAGAGAAATAAGGCCTACTTCACAAAGCGCCTTCCC  
CCGTAAATGATATCATCTCAACTTAGTATTATACCACAC  
CCACCCAAGAACAGGGTTTTGTTAAGATGGCAGAGCCCGGTAATCGCATAAACTTAAAACCTTTACAGTCAGAGGTTCAAT  
TCCTCTTCTTAAACAACATAACCCATGGCCAACCTCCTACTC  
CTCATTGTACCCATTCTAATCGCAATGGCATTCCCTAATGCTTACCGAACGAAAAATTCTAGGCTATATACAACCTACGCAA  
AGGCCCAACGTTGTAGGCCCTACGGGCTACTACAACCC  
TTGCTGACGCCATAAACTCTTACCAAAGAGCCCTAAAACCCGCCACATCTACCATCACCCCTCTACATCACCGCCCC  
GACCTTAGCTCTCACCATCGCTCTTCTACTATGAACCCCC  
CTCCCCATACCAACCCCTGGTTAACCTCAACCTAGGCCTCCTATTTATTCTAGCCACCTCTAGCCTAGCCGTTTACTC  
AATCCTCTGATCAGGATGAGCATCAAACCTCAAACCTACGCC

CTGATCGGGCGACTGCGAGCAGTAGCCCAAACAATCTCATATGAAGTCACCCTAGCCATCATTCTACTATCAACATTACT  
AATAAGTGGCTCCTTTAACCTCTCCTCCCTTATCACAACA  
CAAGAACACCTCTGATTACTCCTGCCATCATGACCCTTGGCCATAATATGATTTATCTCCACACTAGCAGAGACCAACCG  
AACCCCTTCGACCTTGCCGAAGGGGAGTCCGAAGTAGTC  
TCAGGCTTCAACATCGAATACGCCGAGGCCCTTCGCCCTATTCTTCATAGCCGAATACACAAACATTATTATAATAAA  
CACCCCTACCCTACAATCTTCTAGGAACAACATATGAC  
GCACTCTCCCCTGAACTCTACACAACATATTTTGTACCAAGACCCTACTTCTGACCTCCCTGTTCTTATGAATTGAAAC  
AGCATACCCCGATTCCGCTACGACCAACTCATAACCTC  
CTATGAAAAAATTCTTACCCTACCCTAGCATTACTTATATGATATGTCTCCATAACCATTACAATCTCCAGCATTCC  
CCCTCAAACCTAAGAAATATGTCTGATAAAAGAGTTACTT  
TGATAGAGTAAATAATAGGAGCTTAAACCCCTTATTTCTAGGACTATGAGAATCGAACCCATCCCTGAGAATCCAAAAT  
TCTCCGTGCCACCTATCACACCCCATCCTAAAGTAAGGTC  
AGCTAAATAAGCTATCGGGCCATACCCCGAAAATGTTGGTTATACCCTTCCCGTACTAATTAATCCCCTGGCCCAACCC  
GTCATCTACTCTACCATCTTTGCAGGCACACTCATCACAG  
CGCTAAGCTCGCACTGATTTTTTACCTGAGTAGGCCTAGAAATAAACATGCTAGCTTTTTATTCCAGTTCTAACCAAAAA  
ATAAACCCCTCGTTCCACAGAAGCTGCCATCAAGTATTTCC  
TCACGCAAGCAACCGCATCCATAATCCTTCTAATAGCTATCCTCTTCAACAATATACTCTCCGGACAATGAACCATAACC  
AATACTACCAATCAATACTCATCATTATAATAATCATAATGG  
CTATAGCAATAAAACTAGGAATAGCCCCCTTTCCTTCTGAGTCCCAGAGGTTACCCAAGGCACCCCTCTGACATCCGGC  
CTGCTTCTTCTCATATGACAAAAACTAGCCCCCATCTCAA  
TCATATACCAAATCTCTCCCTCACTAAACGTAAGCCTTCTCCTCACTCTCTCAATCTTATCCATCATAGCAGGCAGTTGA  
GGTGGATTAAACCAAACCCAGCTACGCAAAATCTTAGCAT  
ACTCCTCAATTACCCACATAGGATGAATAATAGCAGTTCTACCGTACAACCCTAACATAACCATTCTTAATTTAACTATT  
TATATTATCCTAACTACTACCGCATTCTACTACTCAACT  
TAAACTCCAGCACCACGACCCTACTACTATCTCGCACCTGAAACAAGCTAACATGACTAACACCCTTAATTCCATCCACC  
CTCCTCTCCCTAGGAGGCCTGCCCCCGCTAACCGGCTTTT  
TGCCCAAATGGGCCATTATCGAAGAATTCACAAAAACAATAGCCTCATCATCCCCACCATCATAGCCACCATCACCCCTC  
CTTAACCTCTACTTCTACCTACGCCTAATCTACTCCACCT  
CAATCACACTACTCCCCATATCTAACAACGTAATAAATAAATGACAGTTTGAACATACAAAACCCACCCCATCTCCCC  
ACACTCATCGCCCTTACCACGCTACTCCTACCTATCTCCC  
CTTTTATACTAATAATCTTATAGAAATTTAGGTTAAATACAGACCAAGAGCCTTCAAAGCCCTCAGTAAGTTGCAATACT  
TAATTTCTGTAACAGCTAAGGACTGCAAAAACCCACTCTG  
CATCAACTGAACGCAATCAGCCACTTTAATTAAGCTAAGCCCTTACTAGACCAATGGGACTTAAACCCACAAACACTTA  
GTTAACAGCTAAGCACCCCTAATCAACTGGCTTCAATCTAC  
TTCTCCCGCCGCGGGAAAAAAGGCGGGAGAAGCCCGGCAGGTTTGAAGCTGCTTCTTCGAATTTGCAATTTCAATATGA  
AAATCACCTCGGAGCTGGTAAAAAGAGGCCTAACCCCTGT  
CTTTAGATTTACAGTCCAATGCTTCACTCAGCCATTTTACCTCACCCCT-  
ACTGATGTTCCGCCGACCGTTGACTATTCTCTACAAACCACAAAGACATTGGGACACTATACCTATTATTC  
GGCGCATGAGCTGGGGTCTTAGGCACAGCTCTAAGCCTCCTTATTCGAGCCGAGCTGGGCCAGCCAGGCAACCTTCTAGG  
TAACGACCACATCTACAACGTCATCGTACAGCCCATGCA  
TTTGTAATAATCTTCTTCATAGTAATACCCATCATAATCGGAGGCTTTGGCAACTGACTAGTTCCCTAATAATCGGTGC  
CCCCGATATGGCATTTCCCCGCATAAACAACATAAGCTTC  
TGACTCTTACCTCCCTCTCTCCTACTCCTGCTCGCATCTGCTATAGTGGAGGCCGGAGCAGGAACAGGTTGAACAGTCTA  
CCCTCCCTTAGCAGGGAACCTACTCCACCCTGGAGCCTCC  
GTAGACCTAACCATCTTCTCCTTACACCTAGCAGGTGTCTCCTCTATCTTAGGGGCCATCAATTTTCATCACAACAATTAT  
CAATATAAAAACCCCTGCCATAACCCAATACCAAACGCCC  
CTCTTCGTCTGATCCGTCTAATCACAGCAGTCTACTTCTCCTATCTCTCCAGTCTTAGCTGCTGGCATCACTATACT  
ACTAACAGACCCGCAACCTCAACACCACCTTCTTCGACCCC  
GCCGGAGGAGGAGACCCATTCTATACCAACACCTATTCTGATTTTTTCGGTACCCTGAAGTTTATATTCTTATCCTACC  
AGGCTTCCGAATAATCTCCCATATTGTAACCTTACTACTCC  
GGAAAAAAGAACCATTTGGATACATAGGTATGGTCTGAGCTATGATATCAATTGGCTTCCCTAGGGTTTATCGTGTGAGC  
ACACCATATATTTACAGTAGGAATAGACGTAGACACACGA  
GCATATTTACCTCCGCTACCATAATCATCGCTATCCCCACCGCGTCAAAGTATTTAGCTGACTCGCCACACTCCACGG  
AAGCAATATGAAATGATCTGCTGCAGTGTCTGAGCCCTA  
GGATTCATCTTTCTTTTACCCTAGGTGGCCTGACTGGCATTGTATTAGCAAACCTCATCACTAGACATCGTACTACACGA  
CACGTACTACGTTGTAGCTCACTTCCACTATGCTCCTATCA

ATAGGGGCTGTATTTGCCATCATAGGAGGCTTCATTCACTGATTTCCCTATTCTCAGGCTACACCCTAGACCAAACCTA  
CGCCAAAATCCATTTTCGCTATCATATTCATCGGCGTAAAT  
CTAACTTTCTTCCCACAACACTTTCTCGGCCTATCCGGAATGCCCCGACGTTACTCGGACTACCCCGATGCATACACCAC  
ATGAAATATCCTATCATCTGTAGGCTCATTCAATTTCTCTA  
ACAGCAGTAATATTAATAATTTTCATGATTTGAGAAGCCTTCGCTTCGAAGCGAAAAGTCCTAATAGTAGAAGAACCCTC  
CATAAACCTGGAGTGACTACATGGATGCCCCCACCCTAC  
CACACATTCGAAGAACCCTGATACATAAAAATCTAGACAAAAAGGAAGGAATCGAACCCCCCAAAGCTGGTTTTCAAGCCA  
ACCCCATGGCCTCCATGACTTTTTCAAAAAGATATTAGAA  
AAACCATTTCATAACTTTGTCAAAGTTAAATTATAGGCTAAATCCTATATATCTTAATGGCACATGCAGCGCAAGTAGGT  
CTACAAGACGCTACTTCCCCTATCATAGAAGAGCTTATCA  
CCTTTTCATGATCAGCCCTCATAATCATTTTCTTATCTGCTTCTTAGTCTGTATGCCCTTTTTCTAACACTCACAACA  
AAACTAACTAATACTAACATCTCAGACGCTCAGGAAATAG  
AAACCGTCTGAACTATCCTGCCCGCCATCATCCTAGTCTCATCGCCCTCCCATCCCTACGCATCCTTTACATAACAGAC  
GAGGTCAACGATCCCTCCCTTACCATCAAATCAATTGGCC  
ACCAATGGTACTGAACCTACGAGTACACCGACTACGGCGGACTAATCTTCAACTCCTACATACTTCCCCATTATTCTTA  
GAACCAGGCGACCTGCGACTCCTTGACGTTGACAATCGAG  
TAGTACTCCCGATTGAAACCCCATTCGTATAATAATTACATCACAAGACGTTTGCCTCATGAGCTGTCCCCACACTA  
GGCTTAAAAACAGATGCAATTTCCCGGACGTCTAAACCAA  
CCACTTTACCGCTACACGACCGGGGTATACTACGGTCAATGCTCTGAAATCTGTGGAGCAAACCACAGTTTTCATGCC  
ATCGTCTAGAATTAATTTCCCCTAAAAATCTTTGAAATAG  
GGCCCGTATTTACCCTATAGCACCCCTCTACCCCTCTAGAGCCCACTGTAAAGCTAAGCTTAGCATTAACTTTTTAAGT  
TAAAGATTAAGAGAACCAACACCTCTTTACAGTGAAATGC  
CCCAACTAAATACTACCGTATGGCCACCATAATTACCCCATACTCCTTACACTATTCTCATCACCCAATAAAAAATA  
TTAAACACAAACTACCCTTACCTCCCTCACCAAAGCCCA  
TAAAAATAAAAAATTATAACAAACCCTGAGAACCAAAATGAACGAAAATCTGTTTCGCTTCATTCATTGCCCCCAATCC  
TAGGCCTACCCGCGCAGTACTGATCATTCTATTTCCCC  
TCTATTGATCCCCACCTCCAAATATCTCATCAACAACCGACTAATTACCACCCAACAATGACTAATCAAACCTAACCTCAA  
AACAAATGATAGCCATACACAACACTAAAGGACGAACCTG  
ATCTCTTATACTAGTATCTTAAATCATTTTTATTGGCACAATAACCTCCTCGGACTCCTGCCTCACTCATTTACACCAA  
CCACCCAATATCTATAAACCTAGCCATGGCCATCCCCTT  
ATGAGCGGGCGCAGTGATTATAGGCTTTTCGCTCTAAGATTAAAAATGCCCTAGCCCACTTCTTACCACAAGGCACACCCA  
CACCCCTTATCCCCATACTAGTTATTATCGAAACCATCAG  
CCTACTCATTCAACCAATAGCCCTGGCCGTACGCCTAACCGCTAACATTACTGCAGGCCACCTACTCATGCACCTAATTG  
GAAGCGCCACCCTAGCAATATCGACCATTAACCTTCCCTC  
TACACTTATCATCTTACAATTCTAATTCTACTGACTATCCTAGAAATCGCTGTGCCTTAATCCAAGCCTACGTTTTCA  
CACTTCTAGTAAGCCTCTACCTGCACGACAACACATAATG  
ACCCACCAATCACATGCCTATCATATAGTAAAACCCAGCCCATGACCCCTAACAGGGGCCCTCTCAGCCCTCCTAATGAC  
CTCCGGCCTAGCCATGTGATTCCACTTCCACTCCATAACG  
CTCCTCATACTAGGCCTACTAACCAACACACTAACCATATACCAATGATGGCGGATGTAACACGAGAAAGCACATACCA  
AGGCCACCACACCACCTGTCCAAAAGGCCTTCGATAC  
GGGATAATCCTATTTATTACCTCAGAAGTTTTTTTTCTTCGCAGGATTTTTCTGAGCCTTTTTACCCTCCAGCCTAGCCCC  
TACCCCAACTAGGAGGGCACTGGCCCCAACAGGCATC  
ACCCCGCTAAATCCCCTAGAAGTCCCCTCCTAAACACATCCGTATTACTCGCATCAGGAGTATCAATCACCTGAGCTCA  
CCATAGTCTAATAGAAAACAACCGAAACCAAATAATTCAA  
GCACTGCTTATTACAATTTTACTGGGTCTCTATTTTACCCTCCTACAAGCCTCAGAGTACTTCGAGTCTCCCTTACCCT  
TTCCGACGGCATCTACGGCTCAACATTTTTGTAGCCACA  
GGCTTCCACGGACTTCACGTCAATTTGGCTCAACTTTCCTCACTATCTGCTTCATCCGCCAACTAATATTTCACTTTAC  
ATCCAAACATCACTTTGGCTTCGAAGCCGCCGCTGATAC  
TGGCATTGTTAGATGTGGTTGACTATTTCTGTATGTCTCCATCTATTGATGAGGGTCTTACTCTTTTAGTATAAATAG  
TACCGTTAACTTCCAATTAAGTATTTGACAACATTCAA  
AAAAGAGTAATAAACTTCGCCTTAATTTTAATAATCAACACCCTCCTAGCCTTACTACTAATAATTATTACATTTTACT  
ACCACAACCTCAACGGCTACATAGAAAAATCCACCCCTTAC  
GAGTGCAGCTTCGACCCTATATCCCCGCCCCGCTCCCTTTCTCCATAAAATTTCTTCTTAGTAGCTATTACCTTCTTATT  
ATTTGATCTAGAAATTGCCCTCCTTTTACCCTACCATGA  
GCCCTACAAACAATAACCTGCCACTAATAGCTATGTATCCCTCTTATTAATCATCATCCTAGCCCTAAGTCTGGCCTA  
TGAGTGACTACAAAAGGATTAGACTGAACCGAATTGGTA

TATAGTTTAAACAAAACGAATGATTTGACTCATTAAATTATGATAATCATATTTACCAAATGCCCTCATTACATAAA  
TATTATACTAGCATTTACCATCTCACTTCTAGGAATACTA  
GTATATCGCTCACACCTCATATCCTCCCTACTATGCCTAGAAGGAATAATACTATCACTGTTTATTATAGCTACTCTCAT  
AACCTCAACACCCACTCCCTCTTAGCCAATATTGTGCCT  
ATTGCCATACTAGTCTTTGCCGCCTGCGAAGCAGCGGTAGGCCCTAGCCCTACTAGTCTCAATCTCCAACACATATGGCCT  
AGACTACGTACATAACCTAAACCTACTCCAATGCTAAAAC  
TAATCGTCCCAACAATTATATTACTACCACTGACATGACTCTCCAAAAACACATAATTTGAATCAACACAACCACCCAC  
AGCCTAATTATTAGCATCATCCCCCTACTATTTTTTAACC  
AAATCAACAACAACCTATTTAGCTGTTCCCAACCTTTTCTCCGACCCCTAACAACCCCTCCTAATACTAACTACC  
TGACTCCTACCCCTCACAATCATGGCAAGCCAACGCCACT  
TATCCAGTGAACCACTATCACGAAAAAACTCTACCTCTATACTAATCTCCCTACAAATCTCCTTAATTATAACATTC  
ACAGCCACAGAACTAATCATATTTTATATCTTCTTCGAAA  
CCACACTTATCCCCACCTTGGCTATCATCCCCGATGGGGCAACCAGCCAGAACGCCTGAACGCAGGCACATACTTCTTA  
TTCTACACCCTAGTAGGCTCCCTTCCCCTACTCATCGCAC  
TAATTTATACTCACAACACCCTAGGCTCACTAAACATTCTACTACTCACTCTCACTGCCAAGAACTATCAAACCTCTGA  
GCCAACAACCTAATATGACTAGCTTACACAATAGCTTTTA  
TAGTAAAGATACCTCTTTACGGACTCCACTTATGACTCCCTAAAGCCCATGTGCAAGCCCCCATCGCTGGGTCAATAGTA  
CTTGCCGCGACTACTCTTAAAACCTAGGCGGCTATGGTATAA  
TACGCCTCACACTCATTCTCAACCCCTGACAAAACACATAGCCTACCCCTTCTTGTACTATCCCTATGAGGCATAATT  
ATAACAAGCTCCATCTGCCTACGACAAACAGACCTAAAAT  
CGCTCATTGCATACTCTTCAATCAGCCACATAGCCCTCGTAGTAACAGCCATTCTCATCCAAACCCCTGAAGCTTACC  
GGCGCAGTCACTTCTATAATCGCCACGGACTTACATCCT  
CATTACTATTCTGCCTAGCAAACCTCAAACCTACGAACGCCTCACAGTCGCATCATAATCCTCTCTCAAGGACTTCAAACCT  
CTACTCCCCTAATAGCTTTTTGATGACTTCTAGCAAGCC  
TCGCTAACCTCGCCTTACCCCCCACTATTAACCTACTGGGAGAACTCTCCGTGCTAGTAACCACGTTCTCCTGATCAAAT  
ATCACTCTCCTACTTACAGGACTCAACATACTAGTCACAG  
CCCTATACTCCCTCTACATATTTACCACAACACAATGGGGCTCACTCACCCACCACATTAACAACATAAAAACCCCTCATT  
ACACGAGAAAAACCCCTCATGTTTACACACCTATCCCCA  
TTCTCCTCCTATCCCTCAACCCCGACATCATTACCGGGTTTTCTCCTTGTAAATATAGTTTTAACCAAAACATCAGATTGT  
GAATCTGACAACAGAGGCTTACGACCCCTTATTTACCGAG  
AAAGCTCACAAGAAGTCTAACTCATGCCCCATGTCTAACAACATGGCTTTCTCAACTTTTTAAAGGATAACAGCTATCC  
ATTGGTCTTAGGCCCAAAAATTTTGGTGCAACTCCAAAT  
AAAAGTAATAACCATGCACACTACTATAACCACCCTAACCTGACTTCCCTAATTTCCCCCATCCTTACCACCCTCGTTA  
ACCCTAACAAAAAAACTCATAACCCCACTTATGTAAAATC  
CATTGTGCATCCACCTTTTATTATCAGTCTCTTCCCCACAACAATATTCATGTGCCTAGACCAAGAAGTTATTATCTCGA  
ACTGACACTGAGCCACAACCCAAACAACCCAGCTCTCCCT  
AAGCTTCAAACCTAGACTACTTCTCCATAATATTCATCCCTGTAGCATTGTTTACATGGTCCATCATAGAATTCTCAC  
TGTGATATATAAACTCAGACCCAAACATTAATCAGTTCTT  
CAAATATCTACTCATTTCCTAATTACCATACTAATCTTAGTTACCGCTAACAACTATTCCAACCTGTTTATCGGCTGAG  
AGGGCGTAGGAATTATATCCTTCTTGCTCATCAGTTGATG  
GTACGCCCCGAGCAGATGCCAACACAGCAGCCATTCAAGCAATCCTATACAACCGTATCGGCGATATCGGTTTTATCCTCG  
CCTTAGCATGATTTATCCTACTCCAACCTCATGAGACCC  
TCAACAAATAGCCCTTCTAAACGCTAATCCAAGCCTCACCCCACTACTAGGCCCTCCTCCTAGCAGCAGCAGGCAAATCAG  
CCCAATTAGGTCTCCACCCCTGACTCCCCTCAGCCATAGA  
AGGCCCCACCCAGTCTCAGCCCTACTCCACTCAAGCACTATAGTTGTAGCAGGAGTCTTCTTACTCATCCGCTTCCACC  
CCCTAGCAGAAAATAGCCCACTAATCCAAACTCTAACACT  
ATGCTTAGGCGCTATCACCCTCTGTTTCGAGCAGTCTGCGCCCTTACACAAAATGACATCAAAAAAATCGTAGCCTTCT  
CCACTTCAAGTCAACTAGGACTCATAATAGTTACAATCGG  
CATCAACCAACCACACCTAGCATTCTGCACATCTGTACCACGCCTTCTTCAAAGCCATACTATTTATGTGCTCCGGGT  
CCATCATCCACAACCTTAAACAATGAACAAGATATTCGAAA  
AATAGGAGGACTACTCAAACCATACCTCTCACTTCAACCTCCCTCACCATTTGGCAGCCTAGCATTAGCAGGAATGCCTT  
TCCTCACAGGTTTTCTATTCCAAAGACCACATCATCGAAAC  
CGCAAACATATCATAACAAACGCCTGAGCCCTATCTATTACTCTCATCGCTACCTCCCTGACAAGCGCCTATAGCACTC  
GAATAATTCTTCTCACCCCTAACAGGTCAACCTCGCTTCCC  
TACCCTTACTAACATTAACGAAAATAACCCCACTACTAAACCCATTAACGCCTGGCAGCCGGAAGCCTATTTCGCAG  
GATTTCTCATTACTAACAACATTTCCCCCGCATCCCCCTT

CCAAACAACAATCCCCCTCCACCTAAAACCTCACAGCCCTCGCTGTCACTTTCTTAGGACTTCTAACAGCCCTAGACCTCA  
ACTACCTAACCAACAAACTTAAAATAAAATCCCCACTATG  
CACATTTTATTTTCTCCAACATACTCGGATTCTACCCTAGCATCACACACCGCACAAATCCCCTATCTAGGCCTTCTTACGA  
GCCAAAACCTGCCCTACTCCTCCTAGACCAAACCTGACT  
AGAAAAGCTATTACCTAAAACAATCTCACAGCACCAAATCTCCACCTCCATCATCACCTCAACCCAAAAAGGCATAATCA  
AACTTTACTTCTCTCTTTTCTTCTTCCCACTCATCCTAAC  
CCTACTCCTAATCACATAGCCTATTTCCCCGAGCAATCTCAATTACAACATATACACCAACAAACAATGTTCAACCAGTA  
ACTACTACTAATCAACGCCATAATCATACAAAGCCCCCG  
CACCAATAGGATCCTCCCGAATCAACCCTGACCCCTCTCCTTCATAAATTATTAGCTTCTTACACTATTTAAAGTTTACC  
ACAACCACCACCCCATCATACTCTTTCACCCACAGCACCA  
ATCTACTCTCCATCGTAACCCCACTAAAACACTCACCAAGACCTCAACCCCTGACCCCATGCCTCAGGATACTCCTCA  
ATAGCCATCGCTGTAGTATATCCAAGACAACCATCATT  
CCCCTAAATAAATTAAAAAAACTATTAACCCATATAACCTCCCCAAAATTGAGAATAATAACACACCCCAACCACACCG  
CTAACAATCAATACTAAACCCCATAAATAGGAGAAGGCT  
TAGAAGAAAACCCCAAAACCCCACTAAACCCACACTCAACAGAAAACAAAGCATAACATCATTATTCTCGCACGGACT  
ACAACCACGACCAATGATATGAAAAACCATCGTTGTATTT  
CAACTACAAGAACACCAATGACCCCAATACGCAAAATTAACCCCTAATAAAATTAATTAACCACTCATTTCATCGACCTC  
CCCACCCCATCCAACATCTCCGCATGATGAAACTTCGGCT  
CACTCCTTGGCGCCTGCCTGATCCTCAAATCACACAGGACTATTCTAGCCATGCACTATTACCAGACGCCTCAACC  
GCCTTTTCATCAATCGCCACATCACTCGAGACGTAAATT  
ATGGCTGAATCATCGCTACCTTACGCAATGGCGCCTCAATATTCTTTATCTGCCTCTTCTACACATCGGGCGAGGC  
CTATATTACGGATCATTTCTCTACTCAGAAACCTGAAACA  
TCGGCATTATCCTCCTGCTTGAACCTATAGCAACAGCCTTCATAGGCTATGTCTCCCGTGAGGCCAAATATCATTCTGA  
GGGGCCACAGTAATTACAACTTACTATCCGCCATCCCAT  
ACATTGGGACAGACCTAGTTCAATGAATCTGAGGAGGCTACTCAGTAGACAGTCCCACCCTCACACGATTCTTTACCTTT  
CACTTCATCTTGCCCTTCATTATTGCAGCCCTAGCAGCAC  
TCCACCTCCTATTCTTGACGAAACGGGATCAAACAACCCCTAGGAATCACCTCCCATTCCGATAAAATCACCTTCCAC  
CCTTACTACACAATCAAAGACGCCCTCGGCTTACTTCTCT  
TCCTTCTCTCCTTAATGACATTAACACTATTCTCACCAGACCTCCTAGGCGACCCAGACAATTATACCTAGCCAACCC  
TTAAACACCCCTCCCCACATCAAGCCCGAATGATATTTCC  
TATTGCCTACACAATTCTCCGATCCGTCCCTAACAACTAGGAGGCGTCTTGCCTATTACTATCCATCCTCATCCTA  
GCAATAATCCCCACCCTCCATATATCCAAACAACAAAGCA  
TAATATTTGCGCCACTAAGCCAATCACTTTATTGACTCCTAGCCGACAGCCTCCTCATTCTAACCTGAATCGGAGGACAA  
CCAGTAAGCTACCCTTTTACCATCATTGGACAAGTAGCAT  
CCGTAATACTTACAACAATCCTAATCCTAATACCAACTATCTCCCTAATTGAAAACAAAATACTCAAATGGGCCTGT  
CCTTGTAAGTATAAACTAATACACCAGTCTTGTAACCGGA  
GATGAAAACCTTTTTCCAAGGACAAATCAGAGAAAAAGTCTTTAACTCCACCATTAGCACCCAAAGCTAAGATTCTAATT  
TAAACTATT

#AFRICA Ewondo

CCACAGTTTATGTAGCTTACCTCCTCAAAGCAATACACTGAAAATGTTTGTAGACGGGCTCACATCACCCCATAAACAAATA  
GGTTTGGTCTAGCCTTTCTATTAGCTCTTAGTAAGATTA  
CACATGCAAGCATCCCCGTTCCAGTGAGTTCACCCTCTAAATCACACGATCAAAGGGACAAGCATCAAGCACGCAGCA  
ATGCAGCTCAAACGCTTAGCCTAGCCACACCCCCACGGG  
AAACAGCAGTGATTAACCTTTAGCAATAAACGAAAGTTTAACTAAGCTATACTAACCCAGGGTTGGTCAATTTCTGTGCC  
AGCCACCGCGGTACACGATTAACCCAAGTCAATAGAAGC  
CGGCGTAAAGAGTGTTTTAGATCACCCCTCCCCAATAAAGCTAAAACCTCACCTGAGTTGTAAAAACTCCAGTTGACAC  
AAAATAGACTACGAAAGTGGCTTTAACATATCTGAACACA  
CAATAGCTAAGACCCAACTGGGATTAGATACCCCACTATGCTTAGCCCTAACCTCAACAGTTAAATCAACAAAACCTGC  
TCGCCAGAACACTACGAGCCACAGCTTAAAACCTCAAAGGA  
CCTGGCGGTGCTTCATATCCCTCTAGAGGAGCCTGTTCTGTAATCGATAAACCCCGATCAACCTCACACCTCTTGCTCA  
GCCTATATACCGCCATCTTCAGCAAACCTGATGAAGGCT  
ACAAAGTAAGCGCAAGTACCCACGTAAGACGTTAGGTCAAGGTGTAGCCCATGAGGTGGCAAGAAATGGGCTACATTTT  
CTACCCCAAGAAAACCTACGATAGCCCTTATGAAACTTAAGG  
GTCGAAGGTGGATTTAGCAGTAACTGAGAGTAGAGTGCTTAGTTGAACAGGGCCCTGAAGCGGTACACACCGCCCGTC  
ACCCTCCTCAAGTATACTTCAAAGGACATTTAACTAAAAC

CCCTACGCATTTATATAGAGGAGACAAGTCGTAACATGGTAAGTGTACTGGAAAGTGCACCTTGGACGAACCAGAGTGTAG  
CTTAACACAAAGCACCCAACCTTACACTTAGGAGATTTCAA  
CTTAACCTTGACCGCTCTGAGCTAAACCTAGCCCCAAACCCACTCCACCTTACTACCAGACAACCTTAACCAAACCATTTA  
CCCCAAATAAAGTATAGGCGATAGAAATTGAAACCTGGCGC  
AATAGATATAGTACCGCAAGGGAAAGATGAAAAATTATAACCAAGCATAATATAGCAAGGACTAACCCCTATACCTTCTG  
CATAATGAATTAAGTAGAAATAACTTTTGCAAGGAGAGCCA  
AAGCTAAGACCCCCGAAACCAGACGAGCTACCTAAGAACAGCTAAAAGAGCACACCCCGTCTATGTAGCAAAATAGTGGGA  
AGATTTATAGGTAGAGGCGACAAACCTACCGAGCCTGGTG  
ATAGCTGGTTGTCCAAGATAGAATCTTAGTTCAACTTTAAATTTGCCACAGAACCCTCTAAATCCCCTTGTAATTTAA  
CTGTTAGTCCAAAGAGGAACAGCTCTTTGGACACTAGGAA  
AAAACCTTGTAGAGAGAGTAAAAAA-  
TTTAACACCCCATAGTAGGCCTAAAAGCAGCCACCAATTAAGAAAGCGTTCAAGCTCAACACCCACTACCTAAAAAA-  
TCCCAAACATATAACTG  
AACTCCTCACACCCAATTGGACCAATCTATCACCCCTATAGAAGAATAATGTTAGTATAAGTAACATGAAAACATTCTCC  
TCCGCATAAGCCTGCGTCAGATCAAAACACTGAACTGACA  
ATTAACAGCCCAATATCTACAATCAACCAACAAGTCATTATTACCCTCACTGTCAACCCAACACAGGCATGCTCATAAGG  
AAAGGTTAAAAAAGTAAAAGGAACTCGGCAATCTTACC  
CCGCCTGTTTACCAAAAACATCACCTCTAGCATCACAGTATTAGAGGCACCGCCTGCCAGTGACACATGTTTAAACGGC  
CGCGGTACCCTAACCGTGCAAAGGTAGCATAATCACTTGT  
TCCTTAAATAGGGACCTGTATGAATGGCTCCACGAGGGTTCAAGCTGTCTCTTACTTTTAAACAGTGAAATTGACCTGCC  
GTGAAGAGGCGGGCATGACACAGCAAGACGAGAAGACCCT  
ATGGAGCTTTAATTTATTAATGCAAACAGTACCTAACAAACCCACAGGTCCTAAACTACCAAACCTGCATTAATAATTTT  
GGTTGGGGCGACCTCGGAGCAGAACCCAACCTCCGAGCAG  
TACATGCTAAGACTTCACCAGTCAAAGCGAACTACTATACTCAATTGATCCAATAACTTGACCAACGGAACAAGTTACCC  
TAGGGATAACAGCGCAATCCTATTCTAGAGTCCATATCAA  
CAATAGGGTTTACGACCTCGATGTTGGATCAGGACATCCCGATGGTGCAGCCGCTATTAAAGGTTGTTTTGTTCAACGAT  
TAAAGTCTACGTGATCTGAGTTCAGACCGGAGTAATCCA  
GGTCGGTTTCTATCTACTTCAAATTCCTCCCTGTACGAAAGGACAAGAGAAATAAGGCCTACTTCACAAAGCGCCTTCCC  
CCGTAATGATATCATCTCAACTTAGTATTATATCCACAC  
CCACCCAAGAACAGGGTTTTGTTAAGATGGCAGAGCCCGGTAATCGCATAAACTTAAACTTTACAGTCAGAGGTTCAAT  
TCCTCTTCTTAACAACATACCCATGGCCAACCTCCTACTC  
CTCATTGTACCCATTCTAATCGCAATGGCATTTCCTAATGCTTACCGAACGAAAAATTCTAGGCTATATACAACCTACGCAA  
AGGCCCAACGTTGTAGGCCCTACGGGCTACTACAACCC  
TTCGCTGACGCCATAAACTCTTCACCAAAGAGCCCTAAAACCCGCCACATCTACCATCACCCCTCTACATCACCGCCCC  
GACCTTAGCTCTCACCATCGCTCTTCTACTATGAACCCCC  
CTCCCCATACCCAACCCCTGGTCAACCTCAACCTAGGCCTCCTATTTATTCTAGCCACCTCTAGCCTAGCCGTTTACTC  
AATCCTCTGATCAGGGTGAGCATCAAACCTCAAACCTACGCC  
CTGATCGGCGCACTGCGAGCAGTAGCCCAAACAATCTCATATGAAGTCACCCTAGCCATCATTCTACTATCAACATTACT  
AATAAGTGGCTCCTTTAACCTCTCCACCCTTATCACAACA  
CAAGAACACCTCTGATTACTCCTGCCATCATGACCCTTGCCATAATATGATTTATCTCCACACTAGCAGAGACCAACCG  
AACCCCTTCGACCTTGCCGAAGGGGAGTCCGAACCTAGTC  
TCAGGCTTCAACATCGAATACGCCGAGGCCCTTCGCCCTATTCTTCATAGCCGAATACACAAACATTATTATAATAAA  
CACCCCTACCACTACAATCTTCTTAGGAACAACATATGAC  
GCACTCTCCCCTGAACTCTACACAACATATTTTGTACCAAGACCCTACTTCTAACCTCCCTGTTCTTATGAATTGAAAC  
AGCATAACCCCGATTCCGCTACGACCAACTCATAACCTC  
CTATGAAAAAATTCCTACCACTCACCTAGCATTACTTATATGATATGTCTCCATACCCATTACAATCTCCAGCATTCC  
CCCTCAAACCTAAGAAATATGTCTGATAAAAAGAGTTACTT  
TGATAGAGTAAATAATAGGAGCTTAAACCCCTTATTTCTAGGACTATGAGAATCGAACCCATCCCTGAGAATCCAAAAT  
TCTCCGTGCCACCTATCACACCCATCCTAAAGTAAGGTC  
AGCTAAATAAGCTATCGGGCCATACCCCGAAAATGTTGGTTATACCCTTCCCGTACTAATTAATCCCCTGGCCCAACCC  
GTCATCTACTCTACCATCTTTGCAGGCACACTCATCACAG  
CGCTAAGCTCGCACTGATTTTTTACCTGAGTAGGCCTAGAAATAAACATGCTAGCTTTTTATTCCAGTTCTAACCAAAAA  
ATAAACCTCGTTCCACAGAAGCTGCCATCAAGTATTTCC  
TCACGCAAGCAACCGCATCCATAATCCTTCTAATAGCTATCCTCTTCAACAATATACTCTCCGGACAATGAACCATAACC  
AATACTACCAATCAATACTCATATTAATAATCATAATGG  
CTATAGCAATAAACTAGGAATAGCCCCCTTCACTTCTGAGTCCCAGAGGTTACCCAAGGCACCCCTCTGACATCCGGC  
CTGCTTCTTCTCATATGACAAAAACTAGCCCCCATCTCAA

TCATATAACCAAATCTCTCCCTCACTAAACGTAAGCCTTCTCCTCACTCTCTCAATCTTATCCATCATAGCAGGCAGTTGA  
GGTGGATTAAACCAAACCCAGCTACGCAAATCTTAGCAT  
ACTCCTCAATTACCCACATAGGATGAATAATAGCAGTTCTACCGTACAACCCTAACATAACCATTCTTAATTTAACTATT  
TATATTATCCTAACTACTACCGCATTCTACTACTCAACT  
TAAACTCCAGCACCACGACCCTACTACTATCTCGCACCTGAAACAAGCTAACATGACTAACACCCTTAATTCCATCCACC  
CTCCTCTCCCTAGGAGGCCTGCCCCGCTAACCGGCTTTT  
TGCCCAAATGGGCCATTATCGAAGAATTCACAAAAACAATAGCCTCATCATCCCCACCATCATAGCCACCATCACCCCTC  
CTTAACCTCTACTTCTACCTACGCCTAATCTACTCCACCT  
CAATCACACTACTCCCCATATCTAACAAACGTAATAATAATAATGACAGTTTGAACATACAAAACCCACCCCATTCCTCCCC  
ACACTCATCGCCCTTACCACGCTACTCCTACCTATCTCCC  
CTTTTATACTAATAATCTTATAGAAATTTAGGTTAAATACAGACCAAGAGCCTTCAAAGCCCTCAGTAAGTTGCAATACT  
TAATTTCTGTAACAGCTAAGGACTGCAAAAACCCCACTCTG  
CATCAACTGAACGCAAATCAGCCACTTTAATTAAGCTAAGCCCTTACTAGACCAATGGGACTTAAACCCACAAACACTTA  
GTTAACAGCTAAGCACCCCTAATCAACTGGCTTCAATCTAC  
TTCTCCCGCCGCGGGGAAAAAGGCGGGGAGAAGCCCGGCAGGTTTGAAGCTGCTTCTTCGAATTTGCAATTTCAATATGA  
AAATCACCTCGGAGCTGGTAAAAAGAGGCCTAACCCCTGT  
CTTTAGATTTACAGTCCAATGCTTCACTCAGCCATTTTACCTCACCCCC-  
ACTGATGTTGCGCCGACCGTTGACTATTCTCTACAAACCACAAAGACATTGGAACACTATACTATTATTC  
GGCGCATGAGCTGGAGTCTTAGGCACAGCTCTAAGCCTCCTTATTCGAGCCGAGCTGGGCCAGCCAGGCAACCTTCTAGG  
TAACGACCACATCTACAACGTTATCGTCACAGCCCATGCA  
TTTGTAAATAATCTTCTTCATAGTAATACCCATCATAATCGGAGGCTTTGGCAACTGACTAGTTCCCTAATAATCGGTGC  
CCCCGATATGGCGTTTCCCCGCATAAACAACATAAGCTTC  
TGACTCTTACCCCCCTCTCTCCTACTCCTGCTCGCATCTGCTATAGTGGAGGCCGGAGCAGGAACAGGTTGAACAGTCTA  
CCCTCCCTTAGCAGGGAACCTACTCCCACCCTGGAGCCTCC  
GTAGACCTAACCATCTTCTCCTTACACCTAGCAGGTGTCTCCTCTATCTTAGGGGCCATCAATTTTCATCACAACAATTAT  
CAATATAAAAACCCCTGCCATAACCCAATACCAAACGCCC  
CTCTTCGTCTGATCCGTCTAATCACAGCAGTCTACTTCTCCTATCTCTCCAGTCTTAGCTGCTGGCATCACTATACT  
ACTAACAGACCGCAACCTCAACACCACCTTCTTCGACCCC  
GCCGGAGGAGGAGACCCCTATTCTATACCAACACCTATTCTGATTTTTTCGGTCAACCCTGAAGTTTATATTCTTATCCTACC  
AGGCTTCGGAATAATCTCCCATATTGTAACCTTACTACTCC  
GGAAAAAAGAACCATTTGGATACATAGGTATGGTCTGAGCTATGATATCAATTGGCTTCTTAGGGTTTATCGTGTGAGC  
ACACCATATATTTACAGTAGGAATAGACGTAGACACACGA  
GCATATTTACCTCCGCTACCATAATCATCGCTATCCCCACCGCGTCAAAGTATTTAGCTGACTCGCCACACTCCACGG  
AAGCAATATGAAATGATCTGCTGCAGTCTGAGCCCTA  
GGATTTCATCTTTCTTTTACCAGTAGGTGGCCTGACTGGCATTGTATTAGCAAACCTCATCACTAGACATCGTACTACACGA  
CACGTACTACGTTGTAGCTCACTTCCACTATGTCTATCA  
ATAGGAGCTGTATTTGCCATCATAGGAGGCTTCATTCACTGATTTCCCTATTCTCAGGCTACACCCTAGACCAAACCTA  
CGCCAAAATCCATTTCACTATCATATTCATCGGCGTAAAT  
CTAACTTTCTTCCACAACACTTTCTCGGCCTATCCGGAATGCCCCGACGTTACTCGGACTACCCCGATGCATACACCAC  
ATGAAACATCCTATCATCTGTAGGCTCATTCAATTTCTCTA  
ACAGCAGTAATATTAATAATTTTCATGATTTGAGAAGCCTTCGCTTGAAGCGAAAAGTCTTAATAGTAGAAGAACCCTC  
CATAAACCTGGAGTGACTATATGGATGCCCCCACCCTAC  
CACACATTCGAAGAACCCGTATACATAAAATCTAGACAAAAAGGAAGGAATCGAACCCCCCAAAGCTGGTTTTCAAGCCA  
ACCCCATGGCCTCCATGACTTTTTTCAAAAAGGTATTAGAA  
AAACCATTTCATAACTTTGTCAAAGTTAAATTATAGGCTAAATCCTATATATCTTAATGGCACATGCAGCGCAAGTAGGT  
CTACAAGACGCTACTTCCCCTATCATAGAAGAGCTTATCA  
CCTTTTCATGATCACGCCCTCATAATCATTTCCTTATCTGCTTCTTAGTCTGTATGCCCTTTTCTTAACACTCACAACA  
AAACTAACTAATACTAACATCTCAGACGCTCAGGAAATAG  
AAACCGTCTGAACTATCCTGCCCCCATCATCTAGTCTCATCGCCCTCCCATCCCTACGCATCCTTTACATAACAGAC  
GAGGTCAACGATCCCTCCCTTACCATCAAATCAATTGGCC  
ACCAATGGTACTGAACTACGAGTACACCGACTACGGCGGACTAATCTTCAACTCCTACATACTTCCCCATTATTCTTA  
GAACCAGGCGACCTGCGACTCCTTGACGTTGACAATCGAG  
TAGTACTCCCGATTGAAGCCCCCATTTCGTATAATAATTACATCACAAGACGTCTTGCCTCATGAGCTGTCCCCACATTA  
GGCTTAAAAACAGATGCAATTTCCCGGACGTCTAAACCAA  
CCACTTTACCAGCTACACGACCGGGGTATACTACGGTCAATGCTCTGAAATCTGTGGAGCAAACCACAGTTTTCATGCC  
ATCGTCTAGAATTAATTTCCCTAAAAATCTTTGAAATAG

GGCCCGTATTTACCTATAGCACCCCTCTACCCCTCTAGAGCCACTGTAAAGCTAACTTAGCATTAACTTTTAAGT  
TAAAGATTAAGAGAACCAACACCTCTTTACAGTGAAATGC  
CCCACTAAATACTACCGTATGGCCACCATAATTACCCCATACTCCTTACACTATTCTCATCACCCAATAAAAATA  
TTAAACACAAACTACCACCTACCTCCCTCACCAAAGCCCA  
TAAAAATAAAAAATTATAACAAACCCTGAGAACCAAAATGAACGAAAATCTGTTTCGCTTCATTTCATTGCCCCACAAATCC  
TAGGCCTACCCGCCGAGTACTGATCATTCTATTTCCCTC  
TCTATTGATCCCCACCTCCAAATATCTCATCAACAACCGACTAATCACCACCCAACAATGACTAATCAAACCTAACCTCAA  
AACAAATGATAGCCATACACAACACTAAAGGACGAACCTG  
ATCTCTTATACTAGTATCCTTAATCATTTTTTATTGCCACAATAACCTCCTCGGACTCCTGCCTCACTCATTACACCAA  
CCACCCAATATCTATAAACCTAGCCATGGCCATCCCCTT  
ATGAGCGGGCGCAGTGATTATAGGCTTTTCGCTCTAAGATTAATAATGCCCCTAGCCACTTCTTACCACAAGGCACACCTA  
CACCCCTTATCCCATACTAGTTATTATCGAAACCATCAG  
CCTACTCATTCAACCAATAGCCCTGGCCGTACGCCCTAACCGCTAACATTACTGCAGGCCACCTACTCATGCACCTAATTG  
GAAGCGCCACCCTAGCAATATCAACCATTAACCTTCCCTC  
TACACTTATCATCTTACAATTCTAATTCTACTGACTATCCTAGAAATCGCTGTGCCTTAATCCAAGCCTACGTTTTCA  
CACTTCTAGTAAGCCTCTACCTGCACGACAACACATAATG  
ACCCACCAATCACATGCCTATCATATAGTAAACCCAGCCCATGACCCCTAACAGGGGCCCTCTCAGCCCTCCTAATGAC  
CTCCGGCCTAGCCATGTGATTTCACTTCCACTCCATAACG  
CTCCTCATACTAGGCCTACTAACCAACACACTAACCATATACCAATGATGGCGGATGTAACACGAGAAAGCACATACCA  
AGGCCACCACACACCACCTGTCCAAAAGGCCTTCGATAC  
GGGATAATCCTATTTATTACCTCAGAAGTTTTTTTTCTTCGCAGGATTTTTCTGAGCCTTTTACCCTCCAGCCTAGCCCC  
TACCCCAACTAGGAGGGCACTGGCCCCAACAGGCATC  
ACCCCGCTAAATCCCCTAGAAGTCCCCTCCTAAACACATCCGTATTACTCGCATCAGGAGTATCAATCACCTGAGCTCA  
CCATAGTCTAATAGAAAACAACCGAAACCAATAATTCAA  
GCACTGCTTATTACAATTTTACTGGGTCTCTATTTTACCCTCCTACAAGCCTCAGAGTACTTCGAGTCTCCCTTACCAT  
TTCCGACGGCATCTACGGCTCAACATTTTTTGTAGCCACA  
GGCTTCCACGGACTTCACGTCATTATTGGCTCAACTTTCCTCACTATCTGCTTCATCCGCCAACTAATATTTCACTTTAC  
ATCCAAACATCAGCTTTGGCTTCGAAGCCGCCCTGATAC  
TGGCATTTTGTAGATGTGGTTTACTATTTCTGTATGTCTCCATCTATTGATGAGGGTCTTACTCTTTTAGTATAAATAG  
TACCGTTAACTTCCAATTAAGTATTTTGAACAACATTCAA  
AAAAGAGTAATAAACTTCGCCTTAATTTTTAATAATCAACACCCTCCTAGCCTTACTACTAATAATTATTACATTTTACT  
ACCACAACCTCAACGGCTACATAGAAAATCCACCCCTTAC  
GAGTGCAGCTTCGACCCTATATCCCCCGCCGCGTCCCTTTCTCCATAAAATTTCTTCTTAGTAGCTATTACCTTCTTATT  
ATTTGATCTAGAAATTGCCCTCCTTTTACCCCTACCATGA  
GCCCTACAAACAATAACCTGCCACTAATAGTTATGTCATCCCTCTTATTAATCATCATCCTAGCCCTAAGTCTGGCCTA  
CGAGTGACTACAAAAGGATTAGACTGAGCCGAATTGGTA  
TATAGTTTAAACAAAACGAATGATTTTCGACTCATTAAATTATGATAATCATATTTACCAAATGCCCTCATTACATAAA  
TATTATACTAGCATTACCATCTCACTTCTAGGAATACTA  
GTATATCGCTCACACCTCATATCCTCCCTACTATGCCTAGAAGGAATAATACTATCGCTGTTTCATTATAGCTACTCTCAT  
AACCTCAACACCCACTCCCTCTTAGCCAATATTGTGCCT  
ATTGCCATACTAGTCTTTGCCGCTGCGAAGCAGCGGTGGGCCTAGCCCTACTAGTCTCAATCTCCAACACATATGGCCT  
AGACTACGTACATAACCTAAACCTACTCCAATGCTAAAAC  
TAATCGTCCCAACAATTATATTACTACCACTGACATGACTTTCCAAAAGCACATAATTTGAATCAACACAACCACCCAC  
AGCCTAATTATTAGCATCATCCCCCTACTATTTTTTAACC  
AAATCAACAACAACCTATTTAGCTGTTCCCAACCTTTTCTCCGACCCCTAACAAACCCCTCCTAATACTAACTACC  
TGACTCCTACCCCTCACAAATCATGGCAAGCCAACGCCACT  
TATCCAGTGAACCACTATCACGAAAAAACTCTACCTCTCTATACTAATCTCCCTACAAATCTCCTTAATTATAACATTC  
ACAGCCACAGAATAATCATATTTTATATCTTCTTCGAAA  
CCACACTTATCCCCACCTTGGCTATCATCCCCGATGAGGCAACCAGCCAGAACGCCTGAACGCAGGCACATACTTCTTA  
TTCTACACCCTAGTAGGCTCCCTTCCCCTACTCATCGCAC  
TAATTTACACTCACAAACCCCTAGGCTCACTAAACATTCTACTACTCACTCTCACTGCCCAAGAACTATCAAACCTCCTGA  
GCCAACAACCTAATATGACTAGCTTACACAATAGCTTTTTA  
TAGTAAAGATACCTCTTTACGGACTCCACTTATGACTCCCTAAAGCCCATGTGCAAGCCCCCATCGCTGGGTCAATAGTA  
CTTGCCGCGACTACTCTTAAAACCTAGGCGGCTATGGTATAA  
TACGCCTCACACTCATTCTCAACCCCTGACAAAACACATAGCCTACCCCTTCTTGTACTATCCCTATGAGGCATAATT  
ATAACAAGCTCCATCTGCCTACGACAAACAGACCTAAAAT

CGCTCATTGCATACTCTTCAATCAGCCACATAGCCCTCGTAGTAACAGCCATTCTCATCCAAACCCCCTGAAGCTTCACC  
GGCGCAGTCATTCTCATAATCGCCCACGGACTTACATCCT  
CATTACTATTCTGCCTAGCAAACCTCAAACCTACGAACGCACTCACAGTCGCATCATAATCCTCTCTCAAGGACTTCAAACCT  
CTACTCCCCTAATAGCTTTTTTGGATGACTTCTAGCAAGCC  
TCGCTAACCTCGCCTTACCCCCACTATTAACCTACTGGGAGAAGCTCTCTGTGCTAGTAACCACGTTCTCCTGATCAAAT  
ATCACTCTCCTACTTACAGGACTCAACATACTAGTCACAG  
CCCTATACTCCCTCTACATATTTACCACAACACAATGGGGCTCACTCACCCACCACATTAACAACATAAAACCCCTCATT  
ACACGAGAAAACACCCTCATGTTTCATACACCTATCCCCCA  
TTCTCCTCCTATCCCTCAACCCCGACATCATTACCGGGTTTTTCTCTTGTAATATAGTTTTAACAAAACATCAGATTGT  
GAATCTGACAACAGAGGCTTACGACCCCTTATTTACCGAG  
AAAGCTCACAAGAAGCTTAACCTCATGCCCCCATGTCTAACAAACATGGCTTTTCTCAACTTTTTAAAGGATAACAGCTATCC  
ATTGGTCTTAGGCCCCAAAAATTTTGGTGCAACTCCAAAT  
AAAAGTAATAACCATGCACACTACTATAACCACCCTAACCTGACTTCCCTAATTCCCCCATCCTTACCACCCTCGTTA  
ACCCTAACAAAAAAACTCATACCCCTATTATGTAAAATC  
CATTGTGCGATCCACCTTTTATTATCAGTCTCTTCCCCACAACAATATTCATGTGCCTAGACCAAGAAGTTATTATCTCGA  
ACTGACACTGAGCCACAACCCAAACAACCCAGCTCTCCCT  
AAGCTTCAAACCTAGACTACTTCTCCATAATATTCATCCCTGTAGCATTGTTTCGTTACATGGTCCATCATAGAATTCTCAC  
TGTGATATATAAACTCAGACCCAAACATTAATCAGTTCTT  
CAAATATCTACTCATTTCCTAATTACCATACTAATCTTAGTTACCGCTAACAACTATTCCAAGTTCATCGGCTGAG  
AGGGCGTAGGAATTATATCCTTCTTGCTCATCAGTTGATG  
ATACGCCCAGCAGATGCCAACACAGCAGCCATTCAAGCAATCCTATACAACCGTATCGGCGATATCGGTTTCATCCTCG  
CCTTAGCATGATTTATCCTACTCCAACCTCATGAGACCC  
ACAACAAATAGCCCTTCTAAACGCTAATCCAAGCCTCACCCACTACTAGGCCTCCTCCTAGCAGCAGCAGGCAAATCAG  
CCCAATTAGGTCTCCACCCCTGACTCCCTCAGCCATAGA  
AGGCCCCACCCAGTCTCAGCCCTACTCCACTCAAGCACTATAGTTGTAGCAGGAATCTTCTTACTCATCCGCTTCCACC  
CCCTAGCAGAAAATAGCCCACTAATCCAACTCTAACACT  
ATGCTTAGGCGCTATCACCCTCTGTTTCGAGCAGTCTGCGCCCTTACACAAAATGACATCAAAAAAATCGTAGCCTTCT  
CCACTTCAAGTCAACTAGGACTCATAATAGTTACAATCG  
CATCAACCAACCACTAGCATTCTGCACATCTGTACCCACGCCTTCTTCAAAGCCATACTATTTATGTGCTCCGGGT  
CCATCATCCACAACCTTAAACAATGAACAAGATATTCGAAA  
AATAGGAGGACTACTCAAACCATACCTCTCACTTCAACCTCCCTCACCATTTGGCAGCCTAGCATTAGCAGGAATACCTT  
TCCTCACAGGTTTTTACTTCCAAAGACCACATCATCGAAAC  
CGCAAACATATCATAACAAACGCTGAGCCCTATCTATTACTCTCATCGCTACCTCCCTGACAAGCGCCTATAGCACTC  
GAATAATTCTTCTCACCCCTAACAGGTCAACCTCGCTTCCC  
CACCCCTTACTAACATTAACGAAAATAACCCCACTACTAAACCCATTAACGCCTGGCAGCCGGAAGCCTATTTCGCAG  
GATTTCTCATTACTAACAACATTTCCCCCGCATCCCCCTT  
CCAAACAACAATCCCCCTTACCTAAAACCTCACAGCCCTCGCTGTCACTTTCTTAGGACTTCTAACAGCCCTAGACCTCA  
ACTACCTAACCAACAACCTTAAAATAAAATCCCCACTATG  
CACATTTTATTTCTCAAACATACTCGGATTCTACCCTAGCATCACACACCGCACAATCCCCTATCTAGGCCTTCTTACGA  
GCCAAAACCTGCCCTACTCCTCCTAGACCTAACCTGACT  
AGAAAAGCTATTACCTAAAACAATTTACAGCACCAAATCTCCACCTCCATCATCACCTCAACCCAAAAGGCATAATTA  
AACTTTACTTCTCTTTCTTCTTCCCACTCATCCTAAC  
CCTACTCCTAATCACATAACCTGTTCCCCGAGCAATCTCAATTACAATATATACACCAACAAACAATGTTCAACCAGTA  
ACCCTACTAATCAACGCCATAATCATACAAAGCCCCCG  
CACCAATAGGATCCTCCCGAATCAACCCTGACCCCTCTCCTTATAAATTATTAGCTTCTTACTATTAAAGTTTACC  
ACAACCACCCCATCATACTCTTTACCCACAGCACCA  
ATCCTACCTCCATCGCTAACCCCACTAAAACACTCACCAAGACTCAACCCCTGACCCCATGCCTCAGGATACTCCTCA  
ATAGCCATCGCTGTAGTATATCCAAAGACAACCATCATT  
CCCCTAAAATAAATTAATAAAACTATTAACCCATATAACCTCCCCAAAATTGAGAATAATAACACACCCGACCACACCG  
CAAACAATCAATACTAAACCCCATAAATAGGAGAAGGCT  
TAGAAGAAAACCCCAAAACCCCTACTAAACCCCACTCAACAGAAAACAAAGCATAACATCATTATTCTCGCACGGACT  
ACAACCACGACCAATGATATGAAAAACCATCGTTGTATTT  
CAACTACAAGAACACCAATGACCCCAATACGAAAATTAACCCCTAATAAATTAATTAACCACTCATTATCATCGACCTC  
CCCACCCCATCCAACATCTCCGCATGATGAAACTTCGGCT  
CACTCCTTGGCGCCTGCCTGATCCTCAAATCACACAGGACTATTCTAGCCATGCACTACTCACAGACGCCTCAACC  
GCCTTTTCATCAATCGCCACATCACTCGAGACGTAAAT

ATGGCTGAATCATCCGCTACCTTCACGCCAATGGCGCCTCAATATTCTTTATCTGCCTCTTCTACACATCGGGCGAGGC  
CTATATTACGGATCATTTCTCTACTCAGAAACCTGAAACA  
TCGGCATTATCCTCCTGCTTGCAACTATAGCAACAGCCTTCATAGGCTATGTCTCCCGTGAGGCCAAATATCATTCTGA  
GGGGCCACAGTAATTACAACTTACTATCCGCCATCCCAT  
ACATTGGGACAGACCTAGTTCAATGAATCTGAGGAGGCTACTCAGTAGACAGTCCCACCCTCACACGATTCTTTACCTTT  
CACTTCATCTTACCCTTCATTATTGCAGCCCTAGCAGCAC  
TCCACCTCCTATTCTTGACGAAACGGGATCAAACAACCCCTTAGGAATCACCTCCCATTCCGATAAAATCACCTTCCAC  
CCTTACTACACAATCAAAGACGCCCTCGGCTTACTTCTCT  
TCCTTCTCTCCTTAATGACATTAACACTATTCTCACCAGACCTCCTAGGCGACCCAGACAATTATACCCTAGCCAACCC  
TTAAACACCCCTCCCCACATCAAGCCCGAATGATATTTCC  
TATTGCTACACAATTCTCCGATCCGTCCCTAACAACTAGGAGGCGTCTTGCCCTATTACTATCCATCCTCATCCTA  
GCAATAATCCCCATCCTCCACATATCCAAACAACAAGCA  
TAATATTTGCGCCACTAAGCCAATCACTTTATTGACTCTAGCCGACAGCTCCTCATTCTAACCTGAATCGGAGGACAA  
CCAGTAAGCTACCCTTTTACCATCATTGGACAAGTAGCAT  
CCGTACTATACTTCAACAATCCTAATCCTAATACCAACTATCTCCCTAATTGAAAACAAAATACTCAAATGGGCCTGT  
CCTTGTAGTATAAACTAATACACCAGTCTTGTAACCGGA  
GATGAAAACCTTCTTCCAAGGACAAATCAGAGAAAAAGTCTTTAACTCCACCATTAGCACCCAAAGCTAAGATTCTAATT  
TAAACTATT

#AFRICA Hausa

CCACAGTTTATGTAGCTTACCTCCTCAAAGCAATACACTGAAAATGTTTAGACGGGCTCACATCACCCCATAAACAATA  
GGTTTGGTCTAGCCTTTCTATTAGCTCTTAGTAAGATTA  
CACATGCAAGCATCCCCGTTCCAGTGAGTTACCCTCTAAATCACCACGATCAAAGGGACAAGCATCAAGCACGCAACA  
ATGCAGCTCAAACGCTTAGCCTAGCCACACCCCCACGGG  
AAACAGCAGTGATAAACCTTTAGCAATAAACGAAAGTTTAACTAAGCTATACTAACCCAGGGTTGGTCAATTTCTGTCC  
AGCCACCGCGGTACACGATTAACCCAAGTCAATAGAAGC  
CGGCGTAAAGAGTGTTTTAGATCACCCCTCCCCAATAAAGCTAAAACCTCACCTGAGTTGTAAAAAACTCCAGTTGACAC  
AAAATAAACTACGAAAGTGGCTTTAACATATCTGAATACA  
CAATAGCTAAGACCCAAACTGGGATTAGATACCCCACTATGCTTAGCCCTAAACCTCAACAGTTAAATCAACAAAACCTGC  
TCGCCAGAACACTACGAGCCACAGCTTAAAACCTCAAAGGA  
CCTGGCGGTGCTTCATATCCCTCTAGAGGAGCCTGTTCTGTAATCGATAAACCCCGATCAACCTCACACCTCTTGCTCA  
GCCTATATACCGCCATCTTCAGCAAACCTGATGAAGGCT  
ACAAAGTAAGCGCAAGTACCCACGTAAAGACGTTAGGTCAAGGTGTAGCCCATGAGGTGGCAAGAAATGGGCTACATTTT  
CTACCCAGAAAACCTACGATAGCCCTTATGAAACTTAAGG  
GTCGAAGGTGGATTTAGCAGTAAACTGAGAGTAGAGTGCTTAGTTGAACAGGGCCCTGAAGCGGTACACACCGCCCGTC  
ACCCTCCTCAAGTATACTTCAAAGGACATTTAACTAAAAC  
CCCTACGATTTATATAGAGGAGACAAGTCGTAACATGGTAAGTGTACTGGAAAGTGCACCTGGACGAACCAGAGTGTAG  
CTTAACACAAAGCACCCAACCTTACACTTAGGAGATTTCAA  
CTTAACCTTGACCGCTCTGAGCTAAACCTAGCCCCAAACCCACTCCACCTTACTACCAGACAACCTTAGCCAAACCATTTA  
CCCAAATAAAGTATAGGCGATAGAAATTGAAACCTGGCGC  
AATAGATATAGTACCGCAAGGGAAAGATGAAAAATTATAACCAAGCATAATATAGCAAGGACTAACCCCTATACCTTCTG  
CATAATGAATTAAGTAAATAAATTTGCAAGGAGAGCCA  
AAGCTAAGACCCCCGAAACCAGACGAGCTACCTAAGAACAGCTAAAAGAGCACACCCCGTCTATGTAGCAAAATAGTGGGA  
AGATTTATAGGTAGAGGCGACAAACCTACCGAGCCTGGTG  
ATAGCTGGTTGTCCAAGATAGAATCTTAGTTCAACTTTAAATTTGCCACAGAACCCTCTAAATCCCCTTGTAATTTAA  
CTGTTAGTCAAAGAGGAACAGCTCTTTGGACACTAGGAA  
AAAACCTTGTAGAGAGAGTAAAAAA-  
TTTAAACCCCATAGTAGGCCTAAAAGCAGCCACCAATTAAGAAAGCGTTCAAGCTCAACACCCACTACCTAAAAAA-  
TCCCAAACATATCACTG  
AACTCCTCACACCCAATTGGACCAATCTATCACCCCTATAGAAGAATAATGTTAGTATAAGTAACATGAAAACATTCTCC  
TCCGCATAAGCCTGCGTCAGATTAAAAACACTGAACTGACA  
ATTAACAGCCCAATATCTACAATCAACCAACAAGTCATTATTACCCTCACTGTCAACCCAACACAGGCATGCTCATAAGG  
AAAGGTTAAAAAAGTAAAAGGAACTCGGCAAATCTTACC  
CCGCTGTTTACCAAAAACATCACCTCTAGCATCACAGTATTAGAGGCACCGCCTGCCAGTGACACATGTTTAAACGGC  
CGCGGTACCCTAACCGTGCAAAGGTAGCATAATCACTTGT  
TCCTTAAATAGGGACCTGTATGAATGGCTCCACGAGGGTTGAGCTGTCTCTTACTTTTAAACAGTGAAATTGACCTGCC  
GTGAAGAGGCGGCATGACACAGCAAGACGAGAAGACCT

ATGGAGCTTTAATTTATTAATGCAAACAATACCTAACAAACCCACAGGTCTAAACTACCAAACCTGCATTAAAAATTC  
GGTTGGGGCGACCTCGGAGCAGAACCCAACCTCCGAGCAG  
TACATGCTAAGACTTCACCAGTCAAAGCGAACTACCATACTCAATTGATCCAATAACTTGACCAACGGAACAAGTTACCC  
TAGGGATAACAGCGCAATCCTATTCTAGAGTCCATATCAA  
CAATAGGGTTTACGACCTCGATGTTGGATCAGGACATCCCGATGGTGCAGCCGCTATTAAGGTTTCGTTTGTTC AACGAT  
TAAAGTCTACGTGATCTGAGTTCAGACCCGGAGTAATCCA  
GGTCGGTTTCTATCTACTTCAAATTCCTCCCTGTACGAAAGGACAAGAGAAATAAGGCCTACTTCACAAAGCGCCTTCCC  
CCGTAAATGATATCATCTCAACTTAGTATTATACCCACAC  
CCACCCAAGAACAGGGTTTGTAAAGATGGCAGAGCCCGGTAATCGCATAAACTTAAACTTTACAGTCAGAGGTTCAAT  
TCCTCTTCTTAAACAACATAACCCATGGCCAACCTCCTACTC  
CTCATTGTACCCATTCTAATCGCAATGGCATTTCCTAATGCTTACCGAACGAAAAATTCTAGGCTATATACAACCTACGCAA  
AGGCCCAACGTTGTAGGCCCTACGGGCTACTACAACCC  
TTCGCTGACGCCATAAACTCTTACCAAAGAGCCCTAAAACCCGCCACATCTACCATCACCTATACATCACCGCCCC  
GACCTTAGCTCTCACCATCGCTCTTCTACTATGAACCCCC  
CTCCCCATAACCAACCCCTGGTTAACCTCAACCTAGGCCTCCTATTTATTCTAGCCACCTCTAGCCTAGCCGTTTACTC  
AATCCTCTGATCAGGGTGAGCATCAAACCTCAAACCTACGCC  
CTGATCGGCGCACTGCGAGCAGTAGCCCAAACAATCTCATATGAAGTCACCCTAGCCATCATTCTACTATCAACATTACT  
AATAAGTGGCTCCTTTAACCTCTCCACCCTTATCACAACA  
CAAGAACACCTCTGATTACTCCTGCCATCATGACCCTTGCCATAATATGATTTACCTCCACACTAGCAGAGACCAACCG  
AACCCCTTCGACCTTGCCGAAGGGGAGTCCGAACCTAGTC  
TCAGGCTTCAACATCGAATACGCCGAGGCCCTTCGCCCTATTCTTCATAGCCGAATACACAAACATTATTATAATAAA  
CACCTCACCACTACAATCTTCTAGGAACAACATATGAC  
GCACTCTCCCCTGAACTCTACACAACATATTTTTGTCCACCAAGACCCTACTTCTGACCTCCCTGTTCTTATGAATTCGAAC  
AGCATACCCCGATTCCGCTACGACCAACTCATAACCTC  
CTATGAAAAAATTCTACCCTCACCTTAGCATTACTTATATGATATGTCTCCATACCCATTACAATCTCCAGCATTCC  
CCCTCAAACCTAAGAAATATGTCTGATAAAAGAGTTACTT  
TGATAGAGTAAATAATAGGAGTTTAAACCCCTTATTTCTAGGACTATGAGAATCGAACCCTCCCTGAGAATCCAAAAT  
TCTCCGTGCCACCTATCACACCCCATCCTAAAGTAAGTCT  
AGCTAAATAAGCTATCGGGCCCATACCCCGAAAATGTTGGTTATACCCCTCCCGTACTAATTAATCCCCTGGCCCAACCC  
GTCATCTACTCTACCCTTTGCGAGGCACACTCATCACAG  
CGCTAAGCTCGCACTGATTTTTTACCTGAGTAGGCCTAGAAATAAACATGCTAGCCTTTATTCCAGTTCTAACCAAAAA  
ATAAACCCCTCGTTCCACAGAAGCTGCCATCAAGTATTTCC  
TCACGCAAGCAACCGCATCCATAATCCTTCTAATAGCTATCCTCTTCAACAATATACTCTCCGGACAATGAACCATAACC  
AATACTACCAATCAATACTCATCATTAATAATCATAATGG  
CTATAGCAATAAACTAGGAATAGCCCCCTTTCACTTCTGAGTCCCAGAGGTTACCCAAGGCACCCCTCTGACATCCGGC  
CTGCTTCTTCTCATATGACAAAACTAGCCCCCATCTCAA  
TCATATACCAAATCTCTCCCTCACTAAACGTAAGCCTTCTCCTCACTCTCTCAATCTTATCCATCATAGCAGGCAGTTGA  
GGTGGATTAAACCAAACCCAGCTACGCAAAATCTTAGCAT  
ACTCCTCAATTACCCACATAGGATGAATAATAGCAGTTCTACCGTACAACCCTAACATAACCATTCTTAATTTAACTATT  
TATATCATCCTAACTACTACCGCATTCTACTACTCAACT  
TAAACTCCAGCACCACGACCCTACTACTATCTCGCACCTGAAACAAGCTAACATGACTAACACCCTTAATTCCATCCACC  
CTCCTCTCCCTAGGAGGCCTACCCCGCTAACCGGCTTTT  
TGCCCAAATGGGCCATTATCGAAGAATTCACAAAAACAATAGCCTCATCATCCCCACCATCATAGCCACCATCACCCCTC  
CTTAACCTCTACTTCTACCTACGCCTAATCTACTCCACCT  
CAATCACACTACTCCCATATCTAACAACGTAATAAATAAATGACAGTTTGAACATACAAAACCCACCCACTCCTCCCC  
ACACTCATACCCCTTACCACGCTACTCCTACCTATCTCCC  
CTTTTATACTAATAATCTTATAGAAATTTAGGTTAAATACAGACCAAGAGCCTTCAAAGCCCTCAGTAAGTTGCAATACT  
TAATTTCTGTAACAGCTAAGGACTGCAAAACCTCACTCTG  
CATCAACTGAACGCAAAATCAGCCACTTTAATTAAGCTAAGCCCTTACTAGACCAATGGGACTTAAACCCACAAACACTTA  
GTTAACAGCTAAGCACCTAATCAACTGGCTTCAATCTAC  
TTCTCCCGCCGCGGGAAAAAAGGCGGGAGAAGCCCGGCAGGTTTGAAGCTGCTTCTTTCGAATTTGCAATTTCAATATGA  
AAATCACCTCGGAGCTGGTAAAAAGAGGCCTAACCCCTGT  
CTTTAGATTTACAGTCCAATGCTTCACTCAGCCATTTTACCTCACCCCC-  
ACTGATGTTCCGCGACCGTTGACTATTCTCTACAAACCACAAAGACATTGGAACACTATACTATTATTC  
GGCGCATGAGCTGGAGTCTTAGGCACAGCTCTAAGCCTCCTTATTCGAGCCGAGCTGGGCCAGCCAGGCAACCTTCTAGG  
TAACGACCACATCTACAACGTTATCGTCACAGCCCATGCA

TTTGTAAATAATCTTCTTCATAGTAATACCCATCATAATCGGAGGCTTTGGCAACTGACTAGTTCCCCTAATAATCGGTGC  
CCCCGATATGGCGTTCCCCGCATAAACAACATAAGCTTC  
TGACTCTTACCTCCCTCTCTCCTACTCCTGCTCGCATCTGCTATAGTGGAGGCCGGAGCAGGAACAGGTTGAACAGTCTA  
CCCTCCCTTAGCAGGGAACCTACTCCCACCCTGGAGCCTCC  
GTAGACCTAACCATCTTCTCCTTACACCTAGCAGGTGTCTCCTCTATCTTAGGGGCCATCAATTTTCATCACAACAATTAT  
CAATATAAAACCCCTGCCATAACCCAATACCAAACGCCC  
CTCTTCGTCTGATCCGTCCTAATCACAGCAGTCTACTTCTCCTATCTCTCCCAGTCTTAGCTGCTGGCATCACTATACT  
ACTAACAGACCGCAACCTCAACACCACCTTCTTCGACCCC  
GCCGGAGGAGGAGACCCATTCTATACCAACACCTATTCTGATTTTTTCGGTACCCTGAAGTTTATATTCTTATCCTACC  
AGGCTTCGGAATAATCTCCCATATTGTAACCTTACTACTCC  
GGAAAAAAGAACCATTTGGATACATAGGTATGGTCTGAGCTATGATATCAATTGGCTTCTTAGGTTTTATCGTGTGAGC  
ACACCATATATTTACAGTAGGAATAGACGTAGACACACGA  
GCATATTTTACCTCCGCTACCATAATCATCGCTATCCCCACCGCGTCAAAGTATTTAGCTGACTCGCCACACTCCACGG  
AAGCAATATGAAATGATCTGCTGCAGTGTCTGAGCCCTA  
GGATTCATCTTTCTTTTACCCTAGGTGGCCTGACTGGCATTGTATTAGCAAACCTCATCACTAGACATCGTACTACACGA  
CACGTACTACGTTGTAGCTCACTTCCACTATGTCTATCA  
ATAGGAGCTGTATTTGCCATCATAGGAGGCTTCATTCCTGATTTCCCCTATTCTCAGGCTACACCCTAGACCAAACCTA  
CGCCAAAATCCATTTTCGCTATCATATTCATCGGCGTAAAT  
CTAACTTTCTTCCCACAACACTTTCTCGGCCATCCGGAATGCCCCGACGTTACTCGGACTACCCCGATGCATACACCAC  
ATGAAATATCCTATCATCTGTAGGCTCATTCACTTCTCTA  
ACAGCAGTAATATTAATAATTTTCATGATTTGAGAAGCCTTCGCTTGAAGCGAAAAGTCTAATAGTAGAAGAACCCTC  
CATAAACCTGGAGTACTATATGGATGCCCCCACCCTAC  
CACACATTCGAAGAACCCTGATACATAAAATCTAGACAAAAAGGAAGGAATCGAACCCCCCAAAGCTGGTTTTCAAGCCA  
ACCCCATGGCCTCCATGACTTTTTTCAAAAAGATATTAGAA  
AAACCATTTCATAACTTTGTCAAAGTTAAATTATAGGCTAAATCCTATATATCTTAATGGCACATGCAGCGCAAGTAGGT  
CTACAAGACGCTACTTCCCCTATCATAGAAGAGCTTATCA  
CCTTTTCATGATCACGCCCTCATAATCATTTCCTTATCTGCTTCTTAGTCTGTATGCCCTTTTCTAACACTCACAACA  
AAACTAACTAATACTAACATCTCAGACGCTCAGGAAATAG  
AAACCGTCTGAACCTATCTGCCCCCATCATCTAGTCTCATCGCCCTCCCATCCCTACGCATCCTTTACATAACAGAC  
GAGGTCAACGATCCCTCCCTTACCATCAAATCAATTGGCC  
ACCAATGGTACTGAACCTACGAGTACACCGACTACGGCGGACTAATCTTCAACTCCTACATACTTCCCCATTATTCTTA  
GAACCAGGCGACCTGCGACTCCTTGACGTTGACAATCGAG  
TAGTACTCCCGATTGAAGCCCCCATTTCGTATAATAATTACATCACAAGACGTCTTGCCTCATGAGCTGTCCCCACATTA  
GGCTTAAAAACAGATGCAATTCCCGGACGTCTAAACAAA  
CCACTTTACCCTACACGACCGGGGTATACTACGGTCAATGCTCTGAAATCTGTGGAGCAAACCACAGTTTTCATGCC  
ATCGTCTTAGAATTAATTCCCCTAAAAATCTTTGAAATAG  
GGCCCGTATTTACCCTATAGCACCCCTCTACCCCTCTAGAGCCACTGTAAAGCTAACTTAGCATTAACTTTTAAGT  
TAAAGATTAAGAGAACCAACACCTCTTTACAGTGAATGC  
CCCAACTAAATACTACCGTATGGCCACCATAATTACCCCATACTCCTTACACTATTTCTCATCACCAACTAAAAATA  
TTAAACACAACTACCCTTACCTCCCTCACAAAGCCCA  
TAAAAATAAAAAATTATAACAAACCCTGAGAACCAAAATGAACGAAAATCTGTTTCGCTTCATTCATTGCCCCACAGTCC  
TAGGCCTACCCGCGCAGTACTGATCATTCTATTTCCCC  
TCTATTGATCCCCACCTCCAAATATCTCATCAACAACCGACTAATTACCACCCAACAATGACTAATCAAACCTAACCTCAA  
AACAAATGATAGCCATACACAACACTAAAGGACGAACCTG  
ATCTCTTATACTAGTATCCTTAATCATTTTTTATTGCCACAACCTAACCTCCTCGGACTCCTGCCTCACTCATTACACCAA  
CCACCAACTATCTATAAACCTAGCCATGGCCATCCCCTT  
ATGAGCGGGCGCAGTGATTATAGGCTTTTCGCTCTAAGATTAATAATGCCCCTAGCCACTTCTTACCACAAGGCACACCTA  
CACCCCTTATCCCCATACTAGTTATTATCGAAACCATCAG  
CCTACTCATTCAACCAATAGCCCTGGCCGTACGCTAACCCTAACATTACTGCAGGCCACCTACTCATGCATCTAATTG  
GAAGCGCCACCCTAGCAATATCAACCATTAACCTTCCCTC  
TACTTATCATCTTACAATTCTAATTCTACTGACTATCCTAGAAATCGCTGTGCCTTAAATCCAAGCCTACGTTTTTCA  
CACTTCTAGTAAGCCTCTACCTGCACGACAACACATAATG  
ACCCACCAATCACATGCCTATCATATAGTAAACCCAGCCCATGACCCCTAACAGGGGCCCTCTCAGCCCTCCTAATGAC  
CTCCGGCCTAGCCATGTGATTTCACTTCCACTCCATAACG  
CTCCTCATACTAGGCTGTAAACCAACACACTAACCATATACCAATGATGGCGGATGTAACACGAGAAAGCACATACCA  
AGGCCACCACACACCCTGTCCAAAAGGCCTTCGATAC

GGGATAATCCTATTTATTACCTCAGAAGTTTTTTTTCTTCGCAGGATTTTTCTGAGCCTTTTACCACTCCAGCCTAGCCCC  
TACCCCCCAACTAGGAGGGCACTGGCCCCAACAGGCATC  
ACCCCGCTAAATCCCCTAGAAGTCCCCTCCTAAACACATCCGTATTACTCGCATCAGGAGTATCAATCACCTGAGCTCA  
CCATAGTCTAATAGAAAAACAACCGAAACCAAATAATTCAA  
GCACTGCTTATTACAATTTTACTGGGTCTCTATTTTACCCTCCTACAAGCCTCAGAGTACTTCGAATCTCCCTTACCAT  
TTCCGACGGCATCTACGGCTCAACATTTTTTTGTAGCCACA  
GGCTTCCATGGACTTCACGTCATTATTGGCTCAACTTTTCTCCTACTATCTGCTTCATCCGCCAACTAATATTTCACTTTAC  
ATCCAAACATCACTTTGGCTTCGAAGCCGCCGCCTGATAC  
TGGCATTTTGTAGATGTGGTTTACTATTTCTGTATGTCTCCATCTATTGATGAGGGTCTTACTCTTTTAGTATAAATAG  
TACCGTTAACTTCCAATTAAGTATTTTGACAACATTCAA  
AAAAGAGTAATAAACTTCGCCTTAATTTTAATAATCAACACCCCTCCTAGCCTTACTACTAATAATTATTACATTTTGACT  
ACCACAACCTCAACGGCTACATAGAAAAATCCACCCCTTAC  
GAGTGCAGCTTCGACCCTATATCCCCCGCCGCTCCCTTTCTCCATAAAATTCTTCTTAGTAGCTATTACCTTCTTATT  
ATTTGATCTAGAAATTGCCCTCCTTTTTACCCCTACCATGA  
GCCCTACAAACAATACTGCCACTAATAGTTATGTCATCCCTCTTATTAATCATCATCCTAGCCCTAAGTCTGGCCTA  
TGAGTGACTACAAAAAGGATTAGACTGAGCCGAATTGGTA  
TATAGTTTAAACAAAACGAATGATTTGACTCATTAAATTATGATAATCATATTTACCAAATGCCCTCATTACATAAA  
TATTATACTAGCATTACCATCTCACTTCTAGGAATACTA  
GTATATCGCTCACACCTCATATCCTCCTACTATGCCTAGAAGGAATAATACTATCGCTATTATTATAGCTACTCTCAT  
AACCTCAACACCCACTCCCTCTTAGCCAATATTGTGCCT  
ATTGCCATACTAGTTTTTGGCCGCTGCGAAGCAGCGGTAGGCCTAGCCCTACTAGTCTCAATCTCCAACACATATGGCCT  
AGACTACGTACATAACCTAAACCTACTCCAATGCTAAAAC  
TAATCGTCCCAACAATTATATTACTACCCTGACATGACTCTCCAAAAACACATAATTTGAATCAACACAACCACCCAC  
AGCCTAATTATTAGCATCATCCCCCTACTATTTTTTAACC  
AAATCAACAACAACCTATTTAGCTGCTCCCCAACCTTTTTCTCCGACCCCTAACAACCCCTCCTAATACTAACTACC  
TGACTCCTACCCCTCACAATCATGGCAAGCCAACGCCACT  
TATCCAGTGAACACTATCACGAAAAAACTCTACCTCTCTATACTAATCTCCCTACAAATCTCCTTAATTATAACATTC  
ACAGCCACAGAATAATCATATTTTATATCTTCTTCGAAA  
CCACACTTATCCCCACCTTGGCTATCATACCCGATGAGGCAACCAACCAGAACGCCTGAACGCAGGCACATACTTCTTA  
TTCTACACCCTAGTAGGCTCCCTTCCCCTACTCATCGCAC  
TAATTTACTACTCACAACACCCTAGGCTCACTAAACATTCTACTACTCACTCTCACTGCCCAAGAACTATCAAACCTCCTGA  
GCCAACAACCTTAATATGACTAGCTTACACAATAGCTTTTTA  
TAGTAAAGATACCTCTTTACGGACTCCACTTATGACTCCCTAAAGCCCATGTGGAAGCCCCCATCGCTGGGTCAATAGTA  
CTTGCCGCGACTCTTAAAACCTAGGCGGCTATGGTATAA  
TAGCCTCACACTCATTCTCAACCCCTGACAAAACACATAGCCTACCCCTTCTTGTACTATCCCTATGAGGCATAATT  
ATAACAAGCTCCATCTGCCTACGACAAAACAGACCTAAAAT  
CGCTCATTGCATACTCTTCAATCAGCCACATGGCCCTCGTAGTAACAGCCATTCTCATCCAAACCCCTGAAGCTTACC  
GGCGCAGTCACTTCTATAATCGCCACGGACTTACATCCT  
CATTACTATTCTGCCTAGCAAACCTCAAACCTACGAACGCCTCACAGTCGCATCATAATCCTCTCTCAAGGACTTCAAACCT  
CTACTCCCACTAATAGCTTTTTGATGACTTCTAGCAAGCC  
TCGCTAACCTCGCCTTACCCCTTACTATTAACCTACTGGGAGAACTCTCTGTGCTAGTAACCACATTCTCCTGATCAAAT  
ATCACTCTCCTACTTACAGGACTCAACATACTAGTCACAG  
CCCTATACTCCCTCTACATATTTACCACAACACAATGAGGCTCACTCACCCACCACATTAACAACATAAAACCCCTCATTC  
ACACGAGAAAACACCCTCATGTTTACACCTATCCCCCA  
TTCTCCTCTATCCCTCAACCCCGACATCATTACCGGGTTTTCTCTTGTAAATATAGTTTTAACAAAACATCAGATTGT  
GAATCTGACAACAGAGGCTTACGACCCCTTATTTACCAG  
AAAGCTCACAAGAAGTCTAATCATGCCCCCATGTCTAACAACATGGCTTTTCTCAACTTTTTAAAGGATAACAGCTATCC  
ATTGGTCTTAGGCCCAAAAATTTTGGTGCAACTCCAAT  
AAAAGTAATAACCATGCACACTACTATAACCACCCTAACCTGACTTCCCTAATTCCCCCATCCTTACCACCCTCGTTA  
ACCCTAACAAAAAAACTCATACCCCTATTATGTAAAATC  
CATTGTGCATCCACCTTTATTATCAGTCTCTTCCCCACAACAATATTCATGTGCCTAGACCAAGAAGTTATTATCTCGA  
ACTGACACTGAGCCACAACCCAAACAACCCAGCTCTCCCT  
AAGCTTCAAACCTAGACTACTTCTCCATAATATTCATCCCTGTAGCATTGTTGTTACATGGTCCATCATAGAATTCTCAC  
TGTGATATATAAACTCAGACCCAAACATTAATCAGTTCTT  
CAAATATCTACTCATTTTTCTAATTACCATGCTAATCTTAGTTACCGCTAACAACCTATTCCAACCTGTTTCTCGGCTGAG  
AGGGCGTAGGAATTATATCCTTCTTGTCTCATCAGTTGATG

ATACGCCCGAGCAGATGCCAACACAGCAGCCATTCAAGCAATCCTATAACAACCGTATCGGCGATATCGGTTTCATCCTCG  
CCTTAGCATGATTTATCCTACTCCAACCTCATGAGACCC  
ACAACAAATAGCCCTTCTAAACGCTAATCCAAGCCTCACCCACTACTAGGCCTCCTCCTAGCAGCAGCAGGCAAATCAG  
CCCAATTAGGTCTCCACCCCTGACTCCCCTCAGCCATAGA  
AGGCCCCACCCAGTCTCAGCCCTACTCCACTCAAGCACTATAGTTGTAGCAGGAGTCTTCTTACTCATCCGCTTCCACC  
CCCTAGCAGAAAATAGCCCACTAATCCAACTCTAACACT  
ATGCTTAGGCGCTATCACCCTCTGTTTCGAGCAGTCTGCGCCCTTACACAAAATGACATCAAAAAAATCGTAGCCTTCT  
CCACTTCAAGTCAACTAGGACTCATAGTAGTTACAATCGG  
CATCAACCAACCACACCTAGCATTCTGCACATCTGTACCCACGCCTTCTTCAAAGCCATACTATTTATGTGCTCCGGGT  
CCATCATCCACAACCTTAAACAATGAACAAGATATTCGAAA  
AATAGGAGGACTACTCAAAACCATACCTCTCACTTCAACCTCCCTCACCATTGGCAGCCTAGCATTAGCAGGAATACCTT  
TCCTCACAGGTTTCTATTCCAAAGACCACATCATCGAAAC  
CGCAAACATATCATACACAAACGCCTGAGCCCTATCTATTACTCTCATCGCTACCTCCCTGACAAGCGCCTATAGCACTC  
GAATAATTCTTCTCACCCCTAACAGGTCAACCTCGCTTCCC  
TACCCTTACTAACATTAACGAAAATAACCCACCCCTACTAAACCCCATTAACGCCTGGCAGCCGGAAGCCTATTTCGCAG  
GATTTCTCATTACTAACAACATTTCCCCCGCATCCCCCTT  
CCAAACAACAATCCCCCTCTACCTAAAACCTCACAGCCCTCGCTGTCACTTTCTTAGGACTTCTAACAGCCCTAGACCTCA  
ACTACCTAACCAACAAACTTAAAATAAAAATCCCCACTATG  
CACATTTTATTTCTCCAACATACTCGGATTCTACCCTAGCATCACACACCCGCACAATCCCCTATCTAGGCCTTCTTACGA  
GCCAAAACCTGCCCTACTCCTCCTAGACCTAACCTGACT  
AGAAAAGCTATTACCTAAAACAATTTACAGCACCAAATCTCCACCTCCATCATCACCTCAACCCAAAAGGCATAATTA  
AACTTTACTTCTCTTTTCTTCCCCTCATCCTAAC  
CCTACTCCTAATCACATAACCTATTCCCCCGAGCAATCTCAATTACAATATATACACCAACAAACAATGTTCAACCAGTA  
ACTACTACTAATCAACGCCCATATCATACAAAGCCCCCG  
CACCAATAGGATCCTCCCGAATCAACCCTGACCCCTCTCCTTCATAAATTATTCAGCTCCCTACTATTAAAGTTTACC  
ACAACCACCACCCCATCATACTCTTTCACCCACAGCACCA  
ATCCTACCTCCATCGCTAACCCCACTAAAACACTCACCAAGACCTCAACCCCTGACCCCATGCCTCAGGATACTCCTCA  
ATAGCCATCGTGTAGTATATCCAAAGACAACCATCATTC  
CCCCAAAATAAATAAAAAAACTATTAACCCATATAACCTCCCCAAAATTGAGAATAATAACACACCCGACCACACCG  
CTAACAATCAATACTAAACCCCATAAATAGGAGAAGGCT  
TAGAAGAAAACCCCAACACCCCACTAAACCCACACTCAACAGAAAACAAAGCATAACATCATTATTCTCGCACGGACT  
ACAACCACGACCAATGATATGAAAAACCATCGTTGTATTT  
CAACTACAAGAACACCAATGACCCCAATACGAAAATTAACCCCTAATAAATAAATAAACCCTCATTTCATCGACCTC  
CCCACCCCATCCAACATCTCCGCATGATGAAACTTCGGCT  
CACTCCTTGGCGCCTGCCTGATCCTCCAAATCACACAGGACTATTCTAGCCATGCACTACTCACAGACGCCTCAACC  
GCCTTTTTCATCAATCGCCACATCACTCGAGACGTAAATT  
ATGGCTGAATCATCCGCTACCTTACGCCAATGGCGCCTCAATATTCTTTATCTGCCTCTTCTACACATCGGGCGAGGC  
CTATATTACGGATCATTTCTCTACTCAGAAACCTGAAACA  
TCGGCATTATCCTCCTGCTTGCAACTATAGCAACAGCCTTCATAGGTTATGTCTCCCGTGAGGCCAAATATCATTCTGA  
GGGGCCACAGTAATTACAACTTACTATCCGCCATCCCAT  
ACATTGGGACAGACCTAGTTCAATGAATCTGAGGAGGCTACTCAGTAGACAGTCCCACCCTCACACGATTCTTTACCTTT  
CACTTCATCTTGCCCTTCATTATTGCAGCCCTAGCAGCAC  
TCCACCTCCTATTCTTGACGAAACGGGATCAAAACACCCCTTAGGAATCACCTCCCATTCCGATAAAATCACCTTCCAC  
CCTTACTACACAATCAAAGACACCCTCGGCTTACTTCTCT  
TCCTTCTCTCCTTAATGACATTAACACTATTCTCACAGACCTCCTAGGCGACCCAGACAATTATACCCTAGCCAACCC  
TTAAACACCCCTCCCCACATCAAGCCCGAATGATATTTCC  
TATTGCGCTACACAATTTCTCCGATCCGTCCCTAACAAACTAGGAGGCGTCTTGGCCCTATTACTATCCATCCTCATCCTA  
GCAATAATCCCCATCCTCCATATATCCAAACAACAAAGCA  
TAATATTTGCGCCACTAAGCCAATCACTTTATTGACTCCTAGCCGAGACCTCCTCATTCTAACCTGAATCGGAGGACAA  
CCAGTAAGCTACCCTTTTACCATCATTGGACAAGTAGCAT  
CCGTACTATACTTCAACAATCCTAATCCTAATACCAACTATCTCCCTAATTGAAAACAAAATACTCAAATGGGCCTGT  
CCTTGTAGTATAAACTAATACACCAGTCTTGTAACCGGA  
GATGAAAACCTTTTTTCCAAGGACAAATCAGAGAAAAAGTCTTTAACTCCACCATTAGCACCCAAAGCTAAGATTCTAATT  
TAAACTATT

#AFRICA Mandenka

CCACAGTTTATGTAGCTTACCTCCTCAAAGCAATACACTGAAAATGTTTGTAGACGGGCTCACATCACCCCATAAACAAATA  
GGTTTGGTCTTAGCCTTTCTATTAGCTCCTAGTAAGATTA  
CACATGCAAGCATCCCCATTCCAGTGAGTTCCACCTCTAAATCACCACGATCAAAGGGACAAGCATCAAGCACGCAACA  
ATGCAGCTCAAACGCTTAGCCTAGCCACACCCCCACGGG  
AAACAGCAGTGATTAACCTTTAGCAATAAACGAAAGTTTAACTAAGCTATACTAACCACAGGGTTGGTCAATTTTCGTGCC  
AGCCACCGCGGTACACAGATTAACCCAAGTCAATAGAAGC  
CGGCGTAAAGAGTGTTTTAGATCACCCCTCCCCAATAAAGCTAAAACCTCACCTGAGTTGTAAAAACTCCAGTTGACAC  
AAAATAAACTACGAAAGTGGCTTTAACATATCTGAACACA  
CAATAGCTAAGACCCAAACTGGGATTAGATACCCCACTATGCTTAGCCCTAAACCTCAACAGTTAAATCAACAAAACCTGC  
TCGCCAGAACACTACGAGCCACAGCTTAAAACCTCAAAGGA  
CCTGGCGGTGCTTCATATCCCTCTAGAGGAGCCTGTTCTGTAATCGATAAACCCCGATCAACCTCACACCTCTTGCTCA  
GCCTATATACCGCCATCTTCAGCAAACCCTGATGAAGGCT  
ACAAAGTAAGCGCAAGTACCCACGTAAAGACGTTAGGTCAAGGTGTAGCCCATGAGGTGGCAAGAAATGGGCTACATTTT  
CTACCCAGAAAACCTACGATAGCCCTTATGAAACTTAAGG  
GTGCAAGGTGGATTTAGCAGTAAACTGAGAATAGAGTGCTTAGTTGAACAGGGCCCTGAAGCGCGTACACACCGCCCGTC  
ACCCTCCTCAAGTATACTTCAAAGGACATTTAACTAAAAC  
CCCTACGCATTTATATAGAGGAGACAAGTCGTAACATGGTAAGTGTACTGGAAAGTGCACCTGGACGAACCAGAGTGTAG  
CTTAACACAAAGCACCCAACTTACACTTAGGAGATTTCAA  
CTTAACTTGACCGCTCTGAGCTAAACCTAGCCCCAAACCCACTCCACCTTACTACCAGACAACCTTAGCCAAACCATTTA  
CCCAAATAAAGTATAGGCGATAGAAATTGAAACCTGGCGC  
AATAGATATAGTACCGCAAGGGAAAGATGAAAAATTATAACCAAGCATAATATAGCAAGGACTAACCCCTATACCTTCTG  
CATAATGAATTAAGTAACTAGAAATAACTTTGCAAGGAGAGCCA  
AAGCTAAGACCCCCGAAACCAGACGAGCTACCTAAGAACAGCTAAAAGAGCACACCCGTCTATGTAGCAAAATAGTGGGA  
AGATTTATAGGTAGAGGCGACAAACCTACCGAGCCTGGTG  
ATAGCTGGTTGTCCAAGATAGAATCTTAGTTCAACTTTAAATTTGCCACAGAACCCTCTAAATCCCCTTGTAATTTAA  
CTGTTAGTCCAAAGAGGAACAGCTCTTTGGACACTAGGAA  
AAAACCTTGTAGAGAGAGTAAAAAA-  
TTTAACACCCATAGTAGGCCTAAAAGCAGCCACCAATTAAGAAAGCGTTCAAGCTCAACACCCACTACCTAAAAAA-  
TCCCAAACATATAACTG  
AACTCCTCACACCCAATTGGACCAATCTATCACCTATAGAAGAATAATGTTAGTATAAGTAACATGAAAACATTCTCC  
TCTGCATAAGCCTGCGTCAGATTAAAAACACTGAACTGACA  
ATTAACAGCCCAATATCTACAATCAACCAACAAGTCATTATTACCCCCACTGTCAACCCAACACAGGCATGCTCATAAGG  
AAAGGTTAAAAAAGTAAAAGGAACCTCGGCAAATCTTACC  
CCGCCTGTTTACCAAAAACATCACCTCTAGCATCACAGTATTAGAGGCACCGCCTGCCAGTGACACATGTTTAAACGGC  
CGCGGTACCCTAACCGTGCAAAGGTAGCATAATCACTTGT  
TCCTTAAATAGGGACCTGTATGAATGGCTCCACGAGGGTTCCAGCTGTCTCTTACTTTTTAACAGTGAAATTGACCTGCC  
GTGAAGAGGCGGGCATGACACAGCAAGACGAGAAGACCCT  
ATGGAGCTTTAATTTATTAATGCAAACAGTACCTAACAAACCCACAGGTCTTAACTACCAAACCTGCATTAATAATTTT  
GGTTGGGGCGACCTCGGAGCAGAACCCAACCTCCGAGCAG  
TACATGCTAAGACTTCACCAGTCAAAGCGAACTACTATACTCAATTGATCCAATAACTTGACCAACGGAACAAGTTACCC  
TAGGGATAACAGCGCAATCCTATTCTAGAGTCCATATCAA  
CAATAGGGTTTACGACCTCGATGTTGGATCAGGACATCCCGATGGTGCAGCCGCTATTAAGGTTTCGTTTGTTCACCGAT  
TAAAGTCTACGTGATCTGAGTTCAGACCGGAGTAATCCA  
GGTCGGTTTCTATCTACTTCAAATTCCTCCCTGTACGAAAGGACAAGAGAAATAAGGCCTACTTCACAAAGCGCCTTCCC  
CCGTAAATGATATCATCTCAACTTAGTATAATACCCACAC  
CCACCCAAGAACAGGGTTTGTAAAGATGGCAGAGCCCGGTAATCGCATAAAACTTAAAACCTTTACAGTCAGAGGTTCAAT  
TCCTCTTCTTAAACAACATAACCCATGGCCAACCTCCTACTC  
CTCATTGTACCCATTCTAATCGCAATGGCATTCTAATGCTTACCGAACGAAAAATTCTAGGCTATATACAACCTACGCAA  
AGGCCCAACGTTGTAGGCCCTACGGGCTACTACAACCC  
TTGCTGACGCCATAAACTCTTACCAAAGAGCCCTAAAACCCGCCACATCTACCATCACCTCTACATCACCGCCCC  
GACCTTAGCTCTCACCATCGCTCTTCTACTATGAACCCCC  
CTCCCCATACCCAACCCCTGGTTAACCTCAACCTAGGCCTCCTATTTATTCTAGCCACCTCTAGCCTAGCCGTTTACTC  
AATCCTCTGATCAGGGTGAGCATCAAACCTCAAACCTACGCC  
CTGATCGGCGCACTGCGAGCAGTAGCCCAAACAATCTCATATGAAGTCACCCTAGCCATCATTCTACTATCAACATTACT  
AATAAGTGGCTCCTTTAACCTCTCCACCCTTATCACAACA  
CAAGAACACCTCTGATTACTCCTGCCATCATGACCCTTGCCATAATATGATTTATCTCCACACTAGCAGAGACCAACCG  
AACCCCTTCGACCTTGCCGAAGGGGAGTCCGAACCTAGTC

TCAGGCTTCAACATCGAATACGCCGAGGCCCTTCGCCCTATTCTTCATAGCCGAATACACAAACATTATTATAATAAA  
CACCTCACCCTACAATCTTCTAGGAACAACATATGAC  
GCACTCTCCCCTGAACTCTACACAACATATTTTTGTACCAAGACCCTACTTCTGACCTCCCTGTTCTTATGAATTCGAAC  
AGCATACCCCGATTCCGCTACGACCAACTCATACACCTC  
CTATGAAAAAATTCTACCCTCACCCTAGCATTACTTATATGATATGTCTCCATACCCATTACAATCTCCAGCATTCC  
CCCTCAAACCTAAGAAATATGTCTGATAAAAGAGTTACTT  
TGATAGAGTAAATAATAGGAGCTTAAACCCCTTATTTCTAGGACTATGAGAATCGAACCCTCCCTGAGAATCCAAAAT  
TCTCCGTGCCACCTATCACACCCCATCTAAAGTAAGGTC  
AGCTAAATAAGCTATCGGGCCCATACCCCGAAAATGTTGGTTATACCCTTCCCGTACTAATTAATCCCCTGGCCCAACCC  
GTCATCTACTCTACCATCTTTCAGGCACACTCATCACAG  
CGCTAAGCTCGACTGATTTTTTACCTGAGTAGGCCTAGAAATAAACATGCTAGCTTTTTATTCCAGTTCTAACCAAAAA  
ATAAACCCCTCGTTCCACAGAAGCTGCCATCAAGTATTTCC  
TCACGCAAGCAACCGCATCCATAATCCTTCTAATAGCTATCCTCTTCAACAATATACTCTCCGGACAATGAACCATAACC  
AATACTACCAATCAATACTCATCATTATAATAATCATAATGG  
CTATAGCAATAAAACTAGGAATAGCCCCCTTTCACTTCTGAGTCCCAGAGGTTACCCAAGGCACCCCTCTGACATCCGGC  
CTGCTTCTTCTCACATGACAAAACTAGCCCCCATCTCAA  
TCATATACCAAATCTCTCCCTCACTAAACGTAAGCCTTCTCCTCACTCTCTCAATCTTATCCATCATAGCAGGCAGTTGA  
GGTGGATTAAACCAAACCCAGCTACGCAAAATCTTAGCAT  
ACTCCTCAATTACCCACATAGGATGAATAATAGCAGTTCTACCGTACAACCCTAACATAACCATTCTTAATTTAACTATT  
TATATTATCCTAACTACTACCGCATTCTACTACTCAACT  
TAAACTCCAGCACCACGACCCTACTACTATCTCGCACCTGAAACAAGCTAACATGACTAACACCCTTAATTCCATCCACC  
CTCCTCTCCCTAGGAGGCCTGCCCCGCTAACCGGCTTTT  
TGCCTAAATGGGCCATTATCGAAGAATTCACAAAAACAATAGCCTCATCATCCCCACCATCATAGCCACCATCACCCCTC  
CTTAACCTCTACTTCTACCTACGCCTAATCTACTCCACCT  
CAATCACACTACTCCCCATATCTAACACGTAATAATAAATGACAGTTTGAACATACAAAACCCACCCCATTCCTCCCC  
ACACTCATCGCCCTTACCACGCTACTCCTACCTATCTCCC  
CTTTTATACTAATAATCTTATAGAAATTTAGGTTAAATACAGACCAAGAGCCTTCAAAGCCCTCAGTAAGTTGCAATACT  
TAATTTCTGTAACAGCTAAGGACTGCAAAACCCCACTCG  
CATCAACTGAACGCAAATCAGCCACTTTAATTAAGCTAAGCCCTTACTAGACCAATGGGACTTAAACCCACAAACTTA  
GTTAACAGCTAAGCACCTAATCAACTGGCTTCAATCTAC  
TTCTCCCGCCGCGGGAAAAAAGGCGGGAGAAGCCCCGCGAGGTTTGAAGCTGCTTCTTGAATTTGCAATTCATATGA  
AAATCACCTCGGAGCTGGTAAAAAGAGGCCTAACCCCTGT  
CTTTAGATTTACAGTCCAATGCTTCACTCAGCCATTTTACCTCACCCCT-  
ACTGATGTTCCGCCACCGTTGACTATTCTCTACAAACCACAAAGACATTGGAACACTATACCTATTATTC  
GGCGCATGAGCTGGAGTCTTAGGCACAGCTCTAAGCCTCCTTATTCGAGCCGAGCTGGGCCAGCCAGGCAACCTTCTAGG  
TAACGACCACATCTACAACGTTATCGTACAGCCCATGCA  
TTTGTAAATAATCTTCTCATAGTAATACCCATCATAATCGGAGGCTTTGGCAACTGACTAGTTCCCCTAATAATCGGTGC  
CCCCGATATGGCGTTTCCCCGCATAAACAACATAAGCTTC  
TGACTCTTACCTCCCTCTCTCCTACTCCTGCTCGCATCTGCTATAGTGGAGGCCGGAGCAGGAACAGGTTGAACAGTCTA  
CCCTCCCTTAGCAGGGAATACTCCACCCCTGGAGCCTCC  
GTAGACCTAACCATCTTCTCCTTACACCTAGCAGGTGTCTCCTCTATCTTAGGGGCCATCAATTTATCACAACAATTAT  
CAATATAAAACCCCTGCCATAACCCAATACCAAACGCCC  
CTCTTCGTCTGATCCGTCTAATCACAGCAGTCTACTTCTCCTATCTCTCCAGTCTTAGCTGCTGGCATCACTATACT  
ACTAACAGACCGCAACCTCAACACCACCTTCTTCGACCCC  
GCCGGAGGAGGAGACCCATTCTATACCAACACCTATTCTGATTTTTCGGTCACCCTGAAGTTTATATTCTTATCCTACC  
AGGCTTCGGAATAATCTCCCATATTGTAACCTTACTACTCC  
GGAAAAAAGAACCATTTGGATACATAGGTATGGTCTGAGCTATGATATCAATTGGCTTCTTAGGTTTTATCGTGTGAGC  
ACACCATATATTTACAGTAGGAATAGACGTAGACACACGA  
GCATATTTACCTCCGCTACCATAATCATCGCTATCCCCACCGCGTCAAAGTATTTAGCTGACTCGCCACACTCCACGG  
AAGCAATATGAAATGATCTGCTGCAGTGTCTGAGCCCTA  
GGATTCATCTTTCTTTTACCCTAGGTGGCCTGACTGGCATTGTATTAGCAAACCTCATCACTAGACATCGTACTACACGA  
CACGTACTACGTTGTAGCTCACTTCCACTATGTCCTATCA  
ATAGGAGCTGTATTTGCCATCATAGGAGGCTTCATTCAGTATTTCCCCTATTCTCAGGCTACACCCTAGACCAAACCTA  
CGCCAAAATCCATTTCACTATCATATTCATCGGCGTAAAT  
CTAACTTTCTTCCACAACACTTTCTCGGCCTATCCGGAATGCCCCGACGTTACTCGGACTACCCCGATGCATACACCAC  
ATGAAATATCCTATCATCTGTAGGCTCATTCAATTTCTCTA

ACAGCAGTAATATTAATAATTTTTATGATTTGAGAAGCCTTCGCTTCGAAGCGAAAAGTCTAATAGTAGAAGAACCCTC  
CATAAACCTGGAGTGACTATATGGATGCCCCCACCCTAC  
CACACATTCGAAGAACCCGTATACATAAAATCTAGACAAAAAGGAAGGAATCGAACCCCCAAAGCTGGTTTTCAAGCCA  
ACCCCATGGCCTCCATGACTTTTTCAAAAAGATATTAGAA  
AAACCATTTTCATAACTTTGTCAAAGTTAAATTATAGGCTAAATCCTATATATCTTAATGGCACATGCAGCGCAAGTAGGT  
CTACAAGACGCTACATCCCCTATCATAGAAGAGCTTATCA  
CCTTTTCATGATCACGCCCTCATAATCATTTCCTTATCTGCTTCTAGTCTGTATGCCCTTTTCCTAACACTCACAACA  
AAACTAACTAATACTAACATCTCAGACGCTCAGGAAATAG  
AAACCGTCTGAACTATCCTGCCCGCCATCATCCTAGTCTCATCGCCCTCCCATCCCTACGCATCCTTTACATAACAGAC  
GAGGTCAACGATCCCTCCCTTACCATCAAATCAAATGGCC  
ACCAATGGTACTGAACCTACGAGTACACCGACTACGGCGACTAATCTTCAACTCCTACATACTTCCCCATTATTCTTA  
GAACCAGGCGACTGCGACTCCTTGACGTTGACAATCGAG  
TAGTACTCCCGATTGAAGCCCCCATTTCGTATAATAATTACATCACAAGACGCTTTCGACTCATGAGCTGTCCCCACATTA  
GGCTTAAAAACAGATGCAATTTCCCGGACGTCTAAACCAA  
CCACTTTTACCCTACACGACCGGGGTATACTACGGTCAATGCTCTGAAATCTGTGGAGCAAACCACAGTTTTTCATACCC  
ATCGTCTTAGAATTAATTTCCCTTAAAAATCTTTGAAATAG  
GGCCCGTATTTACCCTATAGCACCCCTCTACCCCTCTAGAGCCACTGTAAAGCTAACTTAGCATTAACTTTTTAAGT  
TAAAGATTAAGAGAACCAACACCTCTTTACAGTGAAATGC  
CCCACTAAATACTACCGTATGGCCACCATAATTACCCCATACTCCTTACACTATTCTCATCACCAACTAAAAATA  
TTAAACACAACTACCACCTACCTCCCTCACCAAAGCCCA  
TAAAAATAAAAAATTATAACAAACCCTGAGAACCAAAATGAACGAAAATCTGTTTCGCTTCATTATTGCCCCACAATCC  
TAGGCCTACCCGCGCAGTACTGATCATTCTATTTCCCC  
TCTATTGATCCCCACCTCCAAATATCTCATCAACAACCGACTAATCACCACCAACAATGACTAATCAAACCTAACCTCAA  
AACAAATGATAGCCATACACAACACTAAAGGACGAACCTG  
ATCCCTTATACTAGTATCCTTAATCATTTTTTATTGCCACAACCTAACCTCCTCGGACTCCTGCCTCACTCATTACACCAA  
CCACCAACTATCTATAAACCTAGCCATGGCCATCCCCTT  
ATGAGCGGGCGCAGTGATTATAGGCTTTTCGCTCTAAGATTAATAATGCCCCTAGCCACTTCTTACCACAAGGCACACCTA  
CACCCCTTATCCCCATACTAGTTATTATCGAAACCATCAG  
CCTACTCATTCAACCAATAGCCCTGGCCGTACGCCTAACCGCTAACATTACTGCAGGCCACCTACTCATGCACCTAATTG  
GAAGCGCCACCCTAGCAATATCAACCATTAACCTTCCCTC  
TACACTTATCATCTTCACAATTCTAATTCTACTGACTATCCTAGAAATCGCTGTGCGCTTAATCCAAGCCTACGTTTTCA  
CACTTCTAGTAAGCCTCTACCTGCACGACAACACATAATG  
ACCCACCAATCGCATGCCTATCATATAGTAAACCCAGCCCATGACCCCTAACAGGGGCCCTCTCAGCCCTCCTAATGAC  
CTCCGGCCTAGCCATGTGATTTCACTTCCACTCCATAACG  
CTCCTCATACTAGGCCTACTAACCAACACACTAACCATATACCAATGATGGCGGATGTAACACGAGAAAGCACATACCA  
AGGCCACCACACACCACCTGTCCAAAAAGGCCTTCGATAC  
GGGATAATCCTATTTATTACCTCAGAAGTTTTTTTTCTTCGAGGATTTTTCTGAGCCTTTTACCCTCCAGCCTAGCCCC  
TACCCCCCAACTAGGAGGGCACTGGCCCCAACAGGCATC  
ACCCCGCTAAATCCCCTAGAAGTCCCACTCCTAAACACATCCGTATTACTCGCATCAGGAGTATCAATCACCTGAGCTCA  
CCATAGTCTAATAGAAAACAACCGAAACCAATAATTCAA  
GCACTGCTTATTACAATTTTACTGGGTCTCTATTTTACCCTCCTACAAGCCTCAGAGTACTTCGAGTCTCCCTTACCAT  
TTCCGACGGCATCTACGGCTCAACATTTTTTTGTAGCCACA  
GGCTTCCACGGACTTCACGTCAATTATTGGCTCAACTTTTCTCCTACTATCTGCTTCATCCGCCAACTAATATTTCACTTTAC  
ATCCAAACATCACTTTGGCTTCGAAGCCGCGCCTGATAC  
TGGCATTTTGTAGATGTGGTTTACTATTTCTGTATGTCTCCATCTATTGATGAGGGTCTTACTCTTTTAGTATAAATAG  
TACCGTTAACTTCAAATTAAGTATTTTGGACAACATTCAA  
AAAAGAGTAATAAACTTCGCCTTAATTTTTAATAATCAACACCCTCCTAGCCTTACTACTAATAATCATTACATTTTACT  
ACCACAACCTCAACGGCTACATAGAAAAATCCACCCCTTAC  
GAGTGCAGCTTCGACCCTATATCCCCCGCCGCTCCCTTTCTCCATAAAATTTCTTCTTAGTAGCTATTACCTTCTTATT  
ATTTGATCTAGAAATTGCCCTCCTTTTACCCTACCATGA  
GCCCTACAAACAACCTGCCACTAATAGTTATGTATCCTCTTATTAATCATCATCCTAGCCCTAAGTCTGGCCTA  
TGAGTACTACAAAAAGGATTAGACTGAGCCGAATTGGTA  
TATAGTTTTAAACAAAACGAATGATTTGACTCATTAAATTATGATAATCATATTTACCAATGCCCTCATTACATAAA  
TATTATACTAGCATTACCATCTCACTTCTAGGAATACTA  
GTATATCGCTCACACCTCATATCCTCCCTACTATGCCTAGAAGGAATAATACTATCGCTGTTTATTATAGCTACTCTCAT  
AACCTCAACACCCACTCCCTCTTAGCCAATATTGTGCCT

ATTGCCATACTAGTCTTTGCCGCCTGCGAAGCAGCGGTGGGCCTAGCCCTACTAGTCTCAATCTCCAACACATATGGCCT  
AGACTACGTACATAACCTAAACCTACTCCAATGCTAAAAC  
TAATCGTCCCAACAATTATATTACTACCACTGACATGACTTTCCAAAAAACACATAATTTGAATCAACACAACCACCCAC  
AGCCTAATTATTAGCATCATCCCCCTACTATTTTTTAACC  
AAATCAACAACAACCTATTTAGCTGTTCCCAACCTTTTTCTCCGACCCCTAACAACCCCTCCTAATACTAACTACC  
TGACTCCTACCCCTCACAATCATGGCAAGCCAACGCCACT  
TATCCAGTGAACCCTATCACGAAAAAACTCTACCTCTCTATACTAATCTCCCTACAAATCTCCTTAATTATAACATTC  
ACAGCCACAGAATAATCATATTTTTATATCTTCTTCGAAA  
CCACACTTATCCCCACCTTGGCTATCATCACCCGATGAGGCAACCAGCCAGAACGCCTGAACGCAGGCACATACTTCCTA  
TTCTACACCCTAGTAGGCTCCCTTCCCCTACTCATCGCA  
TAATTTACACTCACAACACCCTAGGCTCACTAAACATTTCTACTACTCACTCTCACTGCCAAGAACTATCAAACCTCCTGA  
GCCAACAACCTTAATATGACTAGCTTACACAATAGCTTTTA  
TAGTAAAGATACCTCTTTACGGACTCCACTTATGACTCCCTAAAGCCCATGTGGAAGCCCCCATCGCTGGGTCAATAGTA  
CTTGCCGCAGTACTCTTAAAACCTAGGCGGCTATGGTATAA  
TACGCCTCACACTCATTCTCAACCCCTGACAAAACACATAGCCTACCCCTTCCCTGTACTATCCCTATGAGGCATAATT  
ATAACAAGCTCCATCTGCCTACGACAAAACAGACCTAAAAT  
CGCTCATTGCATACTCTTCAATCAGCCACATAGCCCTCGTAGTAACAGCCATTCTCATCCAAACCCCTGAAGCTTCACC  
GGCGCAGTCACTTCTATAATCGCCCACGGACTTACATCCT  
CATTACTATTCTGCCTAGCAAACCTCAAACCTACGAACGCCTCACAGTCGCATCATAATCCTCTCTCAAGGACTTCAAACCT  
CTACTCCCACTAATAGCTTTTTGATGACTTCTAGCAAGCC  
TCGCTAACCTCGCCTTACCCCCCACTATTAACCTACTGGGAGAACTCTCTGTGCTAGTAGCCACGTTCTCCTGATCAAAT  
ATCACTCTCCTACTCACAGGACTCAACATACTAGTCACAG  
CCCTATACTCCCTCTACATATTTACCACAACACAATGGGGCTCACTCACCCACCACATTAACAACATAAAAACCCCTCATTC  
ACACGAGAAAACACCCTCATGTTCCATACACCTATCCCCCA  
TTCTCCTCCTATCCCTCAACCCCGACATCATTACCGGGTTTTCTCCTTGTAAATATAGTTTAAACAAAACATCAGATTGT  
GAATCTGACAACAGAGGCTTACGACCCCTTATTTACCGAG  
AAAGCTCACAAGAAGTCTAACTCATAACCCCATGTCTAACAACATGGCTTTCTCAACTTTTTAAAGGATAACAGCTATCC  
ATTGGTCTTAGGCCCCAAAATTTTTGGTGCAACTCCAAAT  
AAAAGTAATAACCATGCACACTATAACACCCTGACTTCCCTAATTCCCCCATCCTTACCACCCTCGTTA  
ACCCTAACAACAAAACCTCATACCCCACTTATGTAAAATC  
CATTGTGCATCCACCTTTATTATCAGTCTCTTCCCCACAACAATATTATCATGTGCCTAGACCAAGAAGTTATTATCTCGA  
ACTGACACTGAGCCACAACCCAAAACAACCCAGCTCTCCCT  
AAGCTTCAAACCTAGACTACTTCTCCATAATATTCATCCCTGTAGCATTGTTGTTACATGGTCCATCATAGAATTCTCAC  
TGTGATATATAAACTCAGACCCAAAACATTAATCAGTTCTT  
CAAATATCTACTCATTTCCTAATTACCATACTAATCTTAGTTACCGCTAACAACCTATTCCAACCTGTTTCATCGGCTGAG  
AGGGCGTAGGAATTATATCCTTCTTGCTCATCAGTTGATG  
ATACGCCCAGCAGATGCCAACACAGCAGCCATTCAAGCAATCCTATAACAACCGTATCGGCGATATCGGTTTCATCCTCG  
CCTTAGCATGATTTATCCTACACTCCAACCTCATGAGACCC  
ACAACAATAGCCCTTCTAAACGCTAATCCAAGCCTCACCCCACTACTAGGCCTCCTCCTAGCAGCAGCAGGCAAATCAG  
CCCAATTAGGTCTCCACCCCTGACTCCCTCAGCCATAGA  
AGGCCCCACCCAGTCTCAGCCCTACTCCACTCAAGCACTATAGTTGTAGCAGGAATCTTCTTACTCATCCGCTTCCACC  
CCCTAGCAGAAAATAGCCCACTAATCCAACTCTAACACT  
ATGCTTAGGCGCTATCACCCTCTGTTGCGCAGCAGTCTGCGCCCTTACACAAAATGACATCAAAAAAATCGTAGCCTTCT  
CCACTTCAAGTCAACTAGGACTCATAATAGTTACAATCGG  
CATCAACCAACCACACCTAGCATTCTGCACATCTGTACCCACGCCTTCTTCAAAGCCATACTATTTATGTGCTCCGGGT  
CCATCATCCACAACCTTAACAATGAACAAGATATTCGAAA  
AATAGGAGGACTACTCAAACCATACCTCTCACTTCAACCTCCCTCACCATTTGGCAGCCTAGCATTAGCAGGAATACCTT  
TCCTCACAGTTTTCTACTCCAAAGACCACATCATCGAAAC  
CGCAAACATATCATAACAAACGCCTGAGCCCTATCTATTACTCTCATCGCTACCTCCCTAACAAGCGCCTATAGCACTC  
GAATAATTTCTTACCCTAACAGGTCAACCTCGCTTCCC  
TACCCTTACTAACATTAACGAAAATAACCCCACTACTAAACCCCATTAACGCCTGGCAGCCGGAAGCCTATTTCGCAG  
GATTTCTCATTACTAACAACATTTCCCCCGCATCCCCCTT  
CCAAACAACAATCCCCCTCTACCTAAAACCTCACAGCCCTCGCTGTCACTTTCTTAGGACTTCTAACAGCCCTAGACCTCA  
ACTACCTAACCAACAAACTTAAAATAAAAATCCCCACTATG  
CACATTTTATTTCTCCAACATACTCGGATTCTACCCTACCATCACACACCGCACAAATCCCTATCTAGCCCTTCTTACGA  
GCCAAAACCTGCCCTACTCCTCCTAGACCTAACCTGACT

AGAAAAGCTATTACCTAAAACAATTTACAGCACCAAATCTCCACCTCCATCATCACCTCAACCCAAAAAGGCATAATTA  
AACTTTACTTCTCTCTTTCTTCCCGCTCATCCTAAC  
CCTACTCCTAATCACATAACCTATTTCCCCGAGCAATCTCAATTACAATATATACACCAACAAACAATGTTCAACCAGTA  
ACTACTACTAATCAACGCCATAATCATACAAAGCCCCCG  
CACCAATAGGATCCTCCGAATCAACCCTGACCCCTCTCCTTCATAAATTATTTCAGCTTCTTACACTATTAAGTTTACC  
ACAACCACCACCCCATCATACTCTTTACCCACAGCACCA  
ATCCTACCTCCATCGCTAACCCCACTAAAACACTCACCAAGACCTCAACCCCTGACCCCATGCCTCAGGATACTCCTCA  
ATAGCCATCGCTGTAGTATATCCAAAGACAACCATCATT  
CCCCTAAATAAATTAATAAACTATTAACCCATATAACCTCCCCAAAATTTCAGAATAATAACACACCCGACCACACCG  
CTAACAAATCAATACTAAACCCCATAAATAGGAGAAGGCT  
TAGAAGAAAACCCACAAACCCATTACTAAACCCCACTCAACAGAAAACAAGCATAACATCATTATTCTCGCACGGACT  
ACAACCACGACCAATGATATGAAAAACCATCGTTGTATTT  
CAACTACAAGAACACCAATGACCCCAATACGCAAAATTAACCCCTAATAAAATTAATTAACCACTCATTTCATCGACCTC  
CCCACCCCATCCAACATCTCCGCATGATGAAACTTCGGCT  
CACTCCTTGGCGCCTGCCTGATCCTCAAATCACACAGGACTATTCTAGCCATGCCTACTCACAGACGCCTCAACC  
GCCTTTTCATCAATCGCCACATCACTCGAGACGTAAATT  
ATGGCTGAATCATCCGCTACCTTCACGCCAATGGCGCCTCAATATTCTTTATCTGCCTCTTCTACACATCGGGCGAGGC  
CTATATTACGGATCATTCTCTACTCAGAAACCTGAAACA  
TCGGCATTATCCTCCTGCTTACAACATAGCAACAGCCTTCATAGGCTATGTCTCCCGTGAGGCCAAATATCATTCTGA  
GGGGCCACAGTAATTACAACTTACTATCCGCCATCCCAT  
ACATTGGAACAGACCTAGTTCAATGAATCTGAGGAGGCTACTCAGTAGACAGTCCCACCCTCACACGATTCTTTACCTTT  
CACTTCATCTTACCCTTCATTATTGCAGCCCTAGCAGCAC  
TCCACCTCCTATTCTTGCACGAAACGGGATCAAACAACCCCTAGGAATCACCTCCCATTCCGATAAAATCACCTTCCAC  
CCTTACTACACAATCAAAGACGCCCTCGGCTTACTTCTCT  
TCCTTCTCTCCTTAATGACATTAACACTATTCTCACAGACCTCCTAGGCGACCCAGACAATTATACCCTAGCCAACCC  
TTAAACACCCCTCCCCACATCAAGCCCGAATGATATTTCC  
TATTGCCTACACAATTCTCCGATCCGTCCCTAACAACTAGGAGGCGTCTTGCCTATTACTATCCATCCTCATCCTA  
GCAATAATCCCCACTCTCCATATATCCAAACAACAAAGCA  
TAATATTTGCGCCACTAAGCCAATCACTTTATTGACTCCTAGCCGACAGCTCCTCATTCTAACCTGAATCGGAGGACAA  
CCAGTAAGCTACCCTTTTACCATCATTGGACAAGTAGCAT  
CCGTAATACTTCAACAATCCTAATCCTAATACCAATTATCTCCCTAATTGAAAAAAAATACTCAAATGGGCCTGT  
CCTTGTAAGTATAAACTAATACACCAGTCTTGTAACCGGA  
GATGAAAACCTTTTTCCAAGGACAAATCAGAGAAAAAGTCTTTAACTCCACCATTAGCACCCAAAGCTAAGATTCTAATT  
TAACTATT

#AFRICA Mbuti

CCACAGTTTATGTAGCTTACCTCCTCAAAGCAATACACTGAAAATGTTTGTAGACGGGCTCACATCACCCCATAAACAATA  
GGTTTGGTCCTAGCCTTTCTATTAGCTCTTAGTAAGATTA  
CACATGCAAGCATCCCCGTTCCAGTGAGTTCCACCTCTAAATCACACGATCAAAGGGACAAGCATCAAGCACGCAACA  
ATGCAGCTCAAACGCTTAGCCTAGCCACACCCCCACGGG  
AAACAGCAGTGATAAACCTTTAGCAATAAACGAAAGTTTAACTAAGCTATACTAACCCCAAGGTTGGTCAATTTTCGTGCC  
AGCCACCGCGGTACACGATTAACCCAAGTCAATAGAAGC  
CGGCGTAAAGAGTGTTTTAGATCACCCCTCCCCAATAAAGCTAAAACCTCACCTGAGTTGTAAAAAACTCCAGTTGACAC  
AAAATAAACTACGAAAGTGGCTTTAACATATCTGAATACA  
CAATAGCTAAGACCCAACTGGGATTAGATACCCCACTATGCTTAGCCCTAAACCTCAACAGTTAAATCAACAAAACCTGC  
TCGCCAGAACACTACGAGCCACAGCTTAAAACCTCAAAGGA  
CCTGGCGGTGCTTCATATCCCTCTAGAGGAGCCTGTTCTGTAATCGATAAACCCCGATCAACCTCACACCTCTTGCTCA  
GCCTATATACGCCATCTTCAGCAAACCTGATGAAGGCT  
ACAAAGTAAGCGCAAGTACCCACGTAAAGACGTTAGGTCAAGGTGTAGCCCATGAGGTGGCAAGAAATGGGCTACATTTT  
CTACCCCAAGAACTACGATAGCCCTTATGAAACTTAAGG  
GTGCAAGGTGGATTTAGCAGTAACTGAGAGTAGAGTGCTTAGTTGAACAGGGCCCTGAAGCGCGTACACACCCGCCGCT  
ACCCTCCTCAAGTATACTTCAAAGGACATTTAACTAAAAC  
CCCTACGATTTATATAGAGGAGACAAGTCGTAACATGGTAAGTGTACTGGAAAGTGCCTTGGACGAACCAGAGTGTAG  
CTTAACACAAAGCACCCAACTTACACTTAGGAGATTTCAA  
CTTAACCTTGACCGCTCTGAGCTAAACCTAGCCCCAAACCCACTCCACCTTACTACCAGACAACCTTAGCCAAACCATTTA  
CCCAATAAAGTATAGGCGATAGAAATTGAAACCTGGCGC

AATAGATATAGTACCGCAAGGGAAAGATGAAAAATTATAACCAAGCATAATATAGCAAGGACTAACCCCTATACCTTCTG  
CATAATGAATTAAGTAACTAGAAATAACTTTGCAAGGAGAGCCA  
AAGCTAAGACCCCCGAAACCAGACGAGCTACCTAAGAACAGCTAAAAGAGCACACCCCGTCTATGTAGCAAAATAGTGGGA  
AGATTTATAGGTAGAGGGCGACAAACCTACCGAGCCTGGTG  
ATAGCTGGTTGTCCAAGATAGAATCTTAGTTCAACTTTAAATTTGCCACAGAACCCTCTAAATCCCCTTGTAATTTAA  
CTGTTAGTCCAAAGAGGAACAGCTCTTTGGACACTAGGAA  
AAAACCTTGTAGAGAGAGTAAAAAA-  
TTTAACACCCATAGTAGGCCTAAAAGCAGCCACCAATTAAGAAAGCGTTCAAGCTCAACACCCACTACCTAAAAAA-  
TCCCAAACATATGACTG  
AACTCCTCACACCCCAATTGGACCAATCTATCACCCCTATAGAAGAACTAATGTTAGTATAAGTAACATGAAAACATTCTCC  
TCCGCATAAGCCTGCGTCAGATTAATAACACTGAACTGACA  
ATTAACAGCCCAATATCTACAATCAACCAACAAGTCATTATTACCCTCACTGTCAACCCAACACAGGCATGCTCATAAGG  
AAAGGTTAAAAAAGTAAAAGGAACTCGGCAAATCTTACC  
CCGCCTGTTTACCAAAAACATCACCTCTAGCATCACAGTATTAGAGGCACCGCCTGCCAGTGACACATGTTTAAACGGC  
CGCGGTACCCTAACCGTGCAAAGGTAGCATAATCACTTGT  
TCCTTAAATAGGGACCTGTATGAATGGCTCCACGAGGGTTCAGCTGTCTCTTACTTTTAAACCAGTGAAATTGACCTGCC  
GTGAAGAGGCGGGCATGACACAGCAAGACGAGAAGACCCT  
ATGGAGCTTTAATTTATTAATGCAAACAATACCTAACAAACCCACAGGTCTAAACTACCAAACCTGCATTAATAATTTT  
GGTTGGGGCGACCTCGGAGCAGAACCAACCTCCGAGCAG  
TACATGCTAAGACTTCACCAGTCAAAGCGAACTACCATACTCAATTGATCCAATAACTTGACCAACGGAACAAGTTACCC  
TAGGGATAACAGCGCAATCCTATTCTAGAGTCCATATCAA  
CAATAGGGTTTACGACCTCGATGTTGGATCAGGACATCCCGATGGTGCAGCCGCTATTAAGGTTTCGTTTGTTCACCGAT  
TAAAGTCTACGTGATCTGAGTTCAGACCCGGAGTAATCCA  
GGTCGGTTTCTATCTACTTCAAATTCCTCCCTGTACGAAAGGACAAGAGAAATAAGGCCTACTTCACAAAGCGCCTTCCC  
CCGTAAATGATATCATCTCAACTTAGTATTATACCCACAC  
CCACCCAAGAACAGGGTTTGTAAAGATGGCAGAGCCCGGTAATCGCATAAACTTAAACTTTACAGTCAGAGGTTCAAT  
TCCTCTTCTTAAACAACATACCCATGGCCAACCTCCTACTC  
CTCATTGTACCCATTCTAATCGCAATGGCATTCTAATGCTCACCGAACGAAAAATTCTAGGCTATATACAACACTACGCAA  
AGGCCCAACGTTGTAGGCCCTACGGGCTACTACAACCC  
TTCGCTGACGCCATAAACTCTTACCAAAGAGCCCTAAAACCCGCCACATCTACCATCACCCCTATACATCACCGCCCC  
GACCTTAGCTCTCACCATCGCTCTTCTACTATGAACCCCC  
CTCCCCATACCCAACCCCTGGTTAACCTCAACCTAGGCCTCCTATTTATTCTAGCCACCTCTAGCCTAGCCGTTTACTC  
AATCCTCTGATCAGGGTGAGCATCAAACCTCAAACCTACGCC  
CTGATCGGCGCACTGCGAGCAGTAGCCCAAACAATCTCATATGAAGTCACCCTAGCCATCATTCTACTATCAACATTACT  
AATAAGTGGCTCCTTTAACCTCTCCACCCTTATCACAACA  
CAAGAACACCTCTGATTACTCCTGCCATCATGACCCTTGCCATAATATGATTTATCTCCACACTAGCAGAGACCAACCG  
AACCCCTTCGACCTTGCCGAAGGGGAGTCCGAACCTAGTC  
TCAGGCTTCAACATCGAATACGCCGAGGCCCTTCGCCCTATTCTTCATAGCCGAATACACAAACATTATTATAATAAA  
CACCCCTCACCACTACAATCTTCTAGGAACAACATATGAC  
GCACTCTCCCCTGAACTCTACACAACATATTTTGTACCAAGACCCTACTTCTGACCTCCCTGTTCTTATGAATTGAAAC  
AGCATAACCCCGATTCCGCTACGACCAACTCATAACCTC  
CTATGAAAAAATTCCTACCCTCACCCCTAGCATTACTTATATGATATGTCTCCATACCCATTACAATCTCCAGCATTCC  
CCCTCAAACCTAAGAAATATGTCTGATAAAAGAGTTACTT  
TGATAGAGTAAATAATAGGAGTTTAAACCCCTTATTTCTAGGACTATGAGAATCGAACCCTCCCTGAGAATCCAAAAT  
TCTCCGTGCCACCTATCACACCCATCCTAAAGTAAGGTC  
AGCTAAATAAGCTATCGGGCCCATACCCCGAAAAATGTTGGTTATACCCTTCCCGTACTAATTAATCCCCTGGCCCAACCC  
GTCATCTACTCTACCATCTTTGCAGGCACACTCATCACAG  
CGCTAAGCTCGCACTGATTTTTTACCTGAGTAGGCCTAGAAATAAACATGCTAGCCTTTATTCCAGTTCTAACCAAAAA  
ATAAACCCCTCGTTCCACAGAAGCTGCCATCAAGTATTTCC  
TCACGCAAGCAACCGCATCCATAATCCTTCTAATAGCTATCCTCTTCAACAATATACTCTCCGGACAATGAACCATAACC  
AATACTACCAATCAATACTCATCATTATAATAATCATAATGG  
CTATAGCAATAAACTAGGAATAGCCCCCTTCACTTCTGAGTCCCAGAGGTTACCCAAGGCACCCCTCTGACATCCGGC  
CTGCTTCTTCTCATGACAAAAACTAGCCCCCATCTCAA  
TCATATACCAAATCTCTCCCTCACTAAACGTAAGCCTTCTCCTCACTCTCTCAATCTTATCCATCATAGCAGGCAGTTGA  
GGTGGATTAACCAAACCCAGCTACGCAAAATCTTAGCAT  
ACTCCTCAATTACCCACATAGGATGAATAATAGCAGTTCTACCGTACAACCCTAACATAACCATTCTTAATTTAACTATT  
TATATTATCCTAACTACTACCGCATTCTACTACTCACT

TAAACTCCAGCACCACAACCCTACTACTATCTCGCACCTGAAACAAGCTAACATGACTAACACCCTTAATTCCATCCACC  
CTCCTCTCCCTAGGAGGCCTACCCCCACTAACCGGCTTTT  
TGCCCAAATGGGCCATTATCGAAGAATTACAAAAACAATAGCCTCATCATCCCCACCATCATAGCCACCATCACCCCTC  
CTTAACCTCTACTTCTACCTACGCCTAATCTACTCCACCT  
CAATCACACTACTCCCATATCTAACAACGTAAAAATAAAATGACAGTTTGAACATACAAAACCCACCCCACTCCTCCCC  
ACACTCATCACCCTTACCACGCTACTCCTACCTATCTCCC  
CTTTTATACTAATAATCTTATAGAAATTTAGGTTAAATACAGACCAAGAGCCTTCAAAGCCCTCAGTAAGTTGCAATACT  
TAATTTCTGTAAACAGCTAAGGACTGCAAAACCTCACTCTG  
CATCAACTGAACGCAAATCAGCCACTTTAATTAAGCTAAGCCCTTACTAGACCAATGGGACTTAAACCCACAAACTTA  
GTTAACAGCTAAGCACCCCTAGTCAACTGGCTTCAATCTAC  
TTCTCCCGCCCGGGGAAAAAAGCGGGGAGAAGCCCCGGCAGGTTTGAAGCTGCTTCTTTCGAATTTGCAATTC AATATGA  
AAATCACCTCGGAGCTGGTAAAAAGAGGCCTAACCCCTGT  
CTTTAGATTTACAGTCCAATGCTTCACTCAGCCATTTTACCTCACCCCC-  
ACTGATGTTTCGCCGACCGTTGACTATTCTCTACAAACCACAAAGACATTGGAACACTATACTATTATTTC  
GGCGCATGAGCTGGAGTCTTAGGCACAGCTCTAAGCCTCCTTATTCGAGCCGAGCTGGGCCAGCCAGGCAACCTTCTAGG  
TAACGACCACATCTACAACGTTATCGTACAGCCCATGCA  
TTTGTAATAATCTTCTTCATAGTAATACCCATCATAATCGGAGGCTTTGGCAACTGACTAGTTCCCCTAATAATCGGTGC  
CCCCGATATGGCGTTCCCCCGCATAAAACAACATAAGCTTC  
TGACTCTTACCTCCCTCTCTCCTACTCCTGCTCGCATCTGCTATAGTAGAGGCCGGAGCAGGAACAGGTTGAACAGTCTA  
CCCTCCCTTAGCAGGGAACACTCCCACCCTGGAGCCTCC  
GTAGACCTAACCATCTTCTCCTTACACCTAGCAGGTGTCTCCTCTATCTTAGGGGCCATCAATTTATCACACAATTAT  
CAATATAAAACCCCTGCCATAACCCAATACCAAACGCCC  
CTCTTCGTCTGATCCGTCTAATCACAGCAGTCCACTTCTCCTATCTCTCCAGTCCCTAGCTGCTGGCATCACTATACT  
ACTAACAGACCGCAACCTCAACACCACCTTCTTCGACCCC  
GCCGGAGGAGGAGACCCATTCTATACCAACACCTATTCTGATTTTTTCGGTACCCTGAAGTTTATATTCTTATCCTACC  
AGGCTTCGGAATAATCTCCCATATTGTAACCTACTACTCC  
GGAAAAAAGAACCATTTGGATACATAGGTATGGTCTGAGCTATGATATCAATTGGCTTCTTAGGGTTTTATCGTGTGAGC  
ACACCATATATTTACAGTAGGAATAGACGTAGACACACGA  
GCATATTTACCTCCGCTACCATAATCATCGTATCCCCACCGCGTCAAAGTATTTAGCTGACTCGCCACACTCCACGG  
AAGCAATATGAAATGATCTGCTGCAGTGTCTGAGCCCTA  
GGATTCATCTTTCTTTTACCCTAGGTGGCCTGACTGGCATTGTATTAGCAAACCTCATCACTAGACATCGTACTACACGA  
CACGTACTACGTTGTAGCTCACTTCCACTATGTCCTATCA  
ATAGGAGCTGTATTTGCCATCATAGGAGGCTTCATTCCTGATTTCCCCTATTCTCAGGCTACACCCTAGACCAAACCTA  
CGCCAAAATCCATTTCACTATCATATTCATCGGCGTAAAT  
CTAACTTTCTTCCCACAACACTTTCTCGGCCTATCCGGAATGCCCCGACGTTACTCGGACTACCCCGATGCATACACCAC  
ATGAAATATCCTATCATCTGTAGGCTCATTCAATTTCTCTA  
ACAGCAGTAATATTAATAATTTTCATGATTTGAGAAGCCTTCGCTTCGAAGCGAAAAGTCTAATAGTAGAAGAACCCTC  
CATAAACCTGGAGTGACTATATGGATGCCCCCACCCTAC  
CACACATTCGAAGAACCCGTATACATAAAATCTAGACAAAAAAGGAAGGAATCGAACCCCCCAAAGCTGGTTTTCAAGCCA  
ACCCCATGGCCTCCATGACTTTTTTCAAAAAGATATTAGAA  
AAACCATTTATAACTTTGTCAAAGTTAAATTATAGGCTAAATCCTATATATCTTAATGGCACATGCAGCGCAAGTAGGT  
CTACAAGACGCTACTTCCCCTATCATAGAAGAGCTTATCA  
CCTTTTCATGATCACGCCCTCATAATCATTTTCTTATCTGCTTCTTAGTCTGTATGCCCTTTTCTTAACACTCACAACA  
AAACTAACTAATACTAACATCTCAGACGCTCAGGAAATAG  
AAACCGTCTGAACTATCCTGCCCGCCATCATCCTAGTCTCATCGCCCTCCCATCCCTACGCATCCTTTACATAACAGAC  
GAGGTCAACGATCCCTCCCTTACCATCAAATCAATTGGCC  
ACCAATGGTACTGAACCTACGAGTACACCGACTACGGCGGACTAATCTTCAACTCCTACATACTTCCCCATTATTCTTA  
GAACCAGGCGACCTGCGACTCCTTGACGTTGACAATCGAG  
TAGTACTCCCGATTGAAGCCCCCATTTCGTATAATAATTACATCACAAGACGCTTTCGCACTCATGAGCTGTCCCCACATTA  
GGCTTAAAAACAGATGCAATTTCCCGGACGTCTAAACCAA  
CCACTTTACCAGCTACACGACCGGGGTATACTACGGTCAATGCTCTGAAATCTGTGGAGCAAACCACAGTTTTCATGCC  
ATCGTCTTAGAATTAATTTCCCCTAAAAATCTTTGAAATAG  
GGCCCGTATTTACCCTATAGCACCCCC-----  
TCTAGAGCCCACTGTAAAGCTAACTTAGCATTAACTTTTTAAGTTAAAGATTAAGAGAACCAACACCTCTTTACAGTGAA  
ATGC  
CCCAACTAAATACTACCGTATGGCCACCATAATTACCCCATACTCCTTACACTATTTCTCATCACCCAACTAAAAATA  
TTAAACACAAGCTACCACTTACCTCCCTCACCAAAGCCCA

TAAAAATAAAAAATTATAACAAACCCTGAGAACCAAAATGAACGAAAATCTGTTTCGCTTCATTTCATTGCCCCACAGTCC  
TAGGCCTACCCGCCGAGTACTGATCATTCTATTTCCCCC  
TCTATTGATCCCCACCTCCAAATATCTCATCAACAACCGACTAATTACCACCCAACAATGACTAATCAAACCTAACCTCAA  
AACAAATGATAGCCATACACAACACTAAAGGACGAACCTG  
ATCTCTTATACTAGTATCCTTAATCATTFFFFATTGCCACAACCTAACCTCCTCGGACTCCTGCCTCACTCATTACACCAA  
CCACCCAACCTATCTATAAACCTAGCCATGGCCATCCCCCTT  
ATGAGCGGGCGCAGTGATTATAGGCTTTTCGCTCTAAGATTAAAAATGCCCTAGCCCACTTCTTACCACAAGGCACACCTA  
CACCCCTTATCCCCATACTAGTTATTATCGAAACCATCAG  
CCTACTCATTCAACCAATAGCCCTGGCCGTACGCCTAACCGCTAACATTACTGCAGGCCACCTACTCATGCATCTAATTG  
GAAGCGCCACCCTAGCAATATCAACCATTAACCTTCCCTC  
TACACTTATCATCTTTCACAATTCTAATTCTACTGACTATCCTAGAAATCGTGTGCCTTAATCCAAGCCTACGTTTTCA  
CACTTCTAGTAAGCCTCTACCTGCACGACAACACATAATG  
ACCCACCAATCACATGCCTATCATATAGTAAAACCCAGCCCATGACCCCTAACAGGGGCCCTCTCAGCCCTCCTAATGAC  
CTCCGGCCTAGCCATGTGATTTTCACTTCCACTCCATAACG  
CTCCTCATACTAGGCCTGCTAACCAACACACTAACCATATACCAATGATGGCGCGATGTAACACGAGAAAGCACATACCA  
AGGCCACCACACACCACCTGTCCAAAAGGCCTTCGATAC  
GGGATAATCCTATTTATTACCTCAGAAGTTTTTTTTCTTCGCAGGATTTTTCTGAGCCTTTTACCCTCCAGCCTAGCCCC  
TACCCCAACTAGGAGGGCACTGGCCCCAACAGGCATC  
ACCCCGCTAAATCCCCTAGAAGTCCCCTCCTAAACACATCCGTATTACTCGCATCAGGAGTATCAATCACCTGAGCTCA  
CCATAGTCTAATAGAAAACAACCGAAACCAATAATTCAA  
GCACTGCTTATTACAATTTTACTGGGTCTCTATTTTACCCTCCTACAAGCCTCAGAGTACTTGAATCTCCCTTACCAT  
TTCCGACGGCATCTACGGCTCAACATTTTTTTGTAGCCACA  
GGCTTCCATGGACTTCACGTCAATTATTGGCTCAACTTTTCTCACTATCTGCTTCATCCGCCAACTAATATTTCACTTTAC  
ATCCAAACATCACTTTGGCTTCGAAGCCGCCGCCTGATAC  
TGGCATTGTTGTAGATGTGGTTTACTATTTCTGTATGTCTCCATCTATTGATGAGGGTCTTACTCTTTTAGTATAAATAG  
TACCGTTAACTTCCAATTAAGTATTTTGGACAACATTCAA  
AAAAGAGTAATAAACTTCGCCTTAATTTTAATAATCAACACCCTCCTAGCCTTACTACTAATAATTATTACATTTTACT  
ACCACAACCTCAACGGCTACATAGAAAAATCCACCCCTTAC  
GAGTGGGGCTTCGACCCTATATCCCCCGCCGCTCCCTTTTCTCCATAAAATTTCTTCTAGTAGCTATTACCTTCTTATT  
ATTTGATCTAGAAATTTGCCCTCCTTTTACCCTACCATGA  
GCCCTACAAACAACCTAACCTGCCACTAATAGTTATGTATCCCTCTTATTAATCATCATCCTAGCCCTAAGTCTGGCCTA  
TGAGTGACTACAAAAGGATTAGACTGAGCCGAATTGGTA  
TATAGTTTAAACAAAACGAATGATTTTCGACTCATTAAATTATGATAATCATATTTACCAAATGCCCTCATTACATAAA  
TATTATACTAGCATTACCATCTCACTTCTAGGAATACTA  
GTATATCGCTCACACCTCATATCCTCCCTACTATGCCTAGAAGGAATAATACTATCGCTATTTCATTATAGCTACTCTCAT  
AACCTCAACACCCACTCCCTCTTAGCCAATATTGTGCCT  
ATTGCCATACTAGTTTTTGGCCCTGCGAAGCAGCGGTAGGCCTAGCCCTACTAGTCTCAATCTCCAACACATATGGCCT  
AGACTACGTACATAACCTAAACCTACTCCAATGCTAAAAC  
TAATCGTCCCAACAATTATATTACTACCACTGACATGACTCTCCAAAAACACATAATTTGAATCAACACAACCACCCAC  
AGCCTAATTATTAGCATCATCCCCCTACTATTTTTTAACC  
AAATCAACAACAACCTATTTAGCTGCTCCCCAACCTTTTTCTCCGACCCCTAACAAACCCCTCCTAATACTAACTACC  
TGACTCCTACCCCTCACAAATCATGGCAAGCCAACGCCACT  
TATCCAGTGAACCACTATCACGAAAAAACTCTACCTCTCTATACTAATCTCCCTACAAATCTCCTTAATTATAACATTC  
ACAGCCACAGAATAATCATATTTTATATCTTCTTCGAAA  
CCACACTTATCCCCACCTTGGCTATCATACCCGATGAGGCAGCCAACCAGAACGCCTGAACGCAGGCACATACTTCCCTA  
TTCTACACCCTAGTAGGCTCCCTTCCCCTACTCATCGCAC  
TAATTTACACTCACAACTCTAGGCTCACTAAACATTCTACTACTCACTCTCACTGCCAAGAATACTCAAACCTCCTGA  
GCCAACAACCTAATATGACTAGCTTACACAATAGCTTTTTA  
TAGTAAAGATACCTCTTTACGGACTCCACTTATGACTCCCTAAAGCCCATGTGGAAGCCCCCATCGCTGGGTCAATAGTA  
CTTGCCGCGAGTACTCTTAAAACCTAGGCGGCTATGGTATAA  
TACGCCTCACACTCATTCTCAACCCCTGACAAAACACATAGCCTACCCCTTCCCTGTACTATCCCTATGAGGCATAATT  
ATAACAAGCTCCATCTGCCTACGACAAAACAGACCTAAAAT  
CGCTCATTGCATACTCTTCAATCAGCCACATGGCCCTCGTAGTAACAGCCATTCTCATCCAAACCCCTGAAGCTTACC  
GGCGCAGTCACTTCTATAATCGCCCACGGACTTACATCCT  
CATTACTATTCTGCCTAGCAAACCTCAAACCTACGAACGCCTCACAGTCGCATCATAATCCTCTCTCAAGGACTTCAAACCT  
CTACTCCCACTAATAGCTTTTTTGTAGTACTTCTAGCAAGCC

TCGCTAACCTCGCCTTACCCCCACTATTAACCTACTGGGAGAACTCTCTGTGCTAGTAACCACATTCTCCTGATCAAAT  
ATCACTCTCCTACTTACAGGACTCAACATACTAGTCACAG  
CCCTATACTCCCTCTACATATTTACCACAACACAATGAGGCTCACTCACCCACCACATTAACAACATAAAACCCTCATT  
ACACGAGAAAACACCCTCATGTTTATACACCTATCCCCCA  
TTCTCCTCCTATCCCTCAACCCCGACATCATTACCGGGTTTTCTCTTGTAATATAGTTTTAACAAAACATCAGATTGT  
GAGTCTGACAACAGAGGCTTACGACCCCTTATTTACCGAG  
AAAGCTCACAAGAAGTGTAACTCATGCCCCATGTCTAAACAACATGGCTTTCTCAACTTTTAAAGGATAACAGCTATCC  
ATTGGTCTTAGGCCCAAAAATTTTGGTGCAACTCCAAAT  
AAAAGTAATAACCATGCACACTACTATAACCACCCTAACCCCTGACTTCCCTAATTCCCCCATCCTTACCACCCTCGTTA  
ACCCTAACAAAAAACTCATACCCCAATTATGTAAAATC  
CATTGTGCGATCCACCTTTATTATCAGTCTCTTCCCCACAACAATATTATCATGTGCCTAGACCAAGAAGTTATTATCTCGA  
ACTGACACTGAGCCACAACCCAAACAACCCAGCTCTCCCT  
AAGCTTCAAAGTACTACTTCTCCATAATATTATCCCTGTAGCATTGTTGTTACATGGTCCATCATAGAATTCTCAC  
TGTGATATATAAACTCAGACCCAAACATTAATCAGTTCTT  
CAAATATCTACTCATTTCCTAATTACCATGCTAATCTTAGTTACCGCTAACAACTATTCCAAGTTCATCGGCTGAG  
AGGGCGTAGGAATTATATCCTTCTTGCTCATCAGTTGATG  
ATACGCCCCGAGCAGATGCCAACACAGCAGCCATTCAAGCAATCCTATACAACCGTATCGGCGATATCGGTTTCATCCTCG  
CCTTAGCATGATTTATCCTACACTCCAACCTCATGAGACCC  
ACAACAAATAGCCCTTCTAAACGCTAATCCAAGCCTCACCCCACTACTAGGCCTCCTCCTAGCAGCAGCAGGCAAATCAG  
CCCAATTAGGTCTCCACCCCTGACTCCCCTCAGCCATAGA  
AGGCCCCACCCAGTCTCAGCCCTACTCCACTCAAGCACTATAGTTGTAGCAGGAGTCTTCTTACTCATCCGCTTCCACC  
CCCTAGCAGAAAATAGCCCACTAATCCAACTCTAACACT  
ATGCTTAGGCGCTATCACCCTCTGTTTCGAGCAGTCTGCGCCCTTACACAAAATGACATCAAAAAAATCGTAGCCTTCT  
CCACTTCAAGTCAACTAGGACTCATAGTAGTCACAATCGG  
CATCAACCAACCACACCTAGCATTCTGCACATCTGTACCCACGCCTTCTTCAAAGCCATACTATTTATGTGCTCCGGGT  
CCATCATCCACAACCTTAAACAATGAACAAGATATTCGAAA  
AATAGGAGGACTACTCAAACCATACTCTCACTTCAACCTCCCTCACCATTGGCAGCCTAGCATTAGCAGGAATACCTT  
TCCTCACAGTTTTCTATTCCAAAGACCACATCATCGAAA  
CGCAAACATATCATACAAAACGCCTGAGCCCTATCTATTACTCTCATCGCTACCTCCCTGACAAGCGCCTATAGCACTC  
GAATAATTTCTTCAACCTAACAGGTCAACCTCGTTCCC  
TACCCTTACTAACATTAACGAAAATAACCCCACTACTAAACCCCATTAACGCCTGGCAGCCGGAAGCCTATTTCGAG  
GATTTCTCATTACTAACAACTTTTCCCCGCATCCCCCTT  
CCAAACAACAATCCCCCTTACTTAAACTCACAGCCCTCGCTGTCACTTTCTTAGGACTTCTAACAGCCCTAGACCTCA  
ACTACCTAACCAACAACTTAAAATAAAATCCCCACTATG  
CACATTTTATTTCTCCAACATACTCGGATTCTACCCTAGCATCACACACCGCACAAATCCCCTATCTAGGCCTTCTTACGA  
GCCAAAACCTGCCCCCTACTCCTCCTAGACCTAACCTGACT  
AGAAAAGCTATTACCTAAAACAATTTACAGCACCAAATCTCCACCTCCATCATCACCTCAACCCAAAAAGGCATAATTA  
AACTTTACTTCTCTCTTTCTTCTTCCCACTCATCCTAAC  
CCTACTCCTAATCACATAACCTATTTCCCCGAGCAATCTCAATTACAATATATACACCAACAAACAATGTTCAACCAGTA  
ACTACTACTAATCAACGCCATAATCATACAAAGCCCCCG  
CACCAATAGGATCCTCCCGAATCAACCCTGACCCCTCTCCTTATAAATTATTAGCTCCCTACACTATTAAGTTTACC  
ACAACCACCACCCATCATACTCTTTCACCCACAGCACCA  
ATCCTACCTCCATCGCTAACCCCACTAAAACACTCACCAAGACCTCAACCCCTGACCCCATGCCTCAGGATACTCCTCA  
ATAGCCATCGCTGTAGTATATCCAAAGACAACCATCATTC  
CCCCTAAATAAATTAATAAACTATTAACCCATATAACCTCCCCAAAATTCAGAATAATAACACACCCGACCACACCG  
CTAACAATCAATACTAAACCCCATAAATAGGAGAAGGCT  
TAGAAGAAAACCCCAAAAACCCCTTACTAAACCCCACTCAACAGAAAACAAGCATAACATCATTATTCTCGCACGGACT  
ACAACCACGACCAATGATATGAAAAACCATCGTTGTATTT  
CAACTACAAGAACACCAATGACCCCAATACGAAAATTAACCCCTAATAAAATTAATTAACCACTCATTATCATCGACCTC  
CCCACCCATCCAACATCTCCGCATGATGAAACTTTCGGCT  
CACTCCTTGGCGCCTGCCTGATCCTCCAAATCACACAGGACTATTCTAGCCATGCACTACTCACAGACGCCTCAACC  
GCCTTTTTCATCAATCGCCACATCACTCGAGACGTAAATT  
ATGGCTGAATCATCCGCTACCTTACGCCAATGGCGCCTCAATATTCTTTATCTGCCTCTTCTACACATCGGGCGAGGC  
CTATATTACGGATCATTTCTTACTCAGAAACCTGAAACA  
TCGGCATTATCCTCCTGCTTGCAACTATAGCAACAGCCTTCATAGGTTATGTCTCCCGTGAGGCCAAATATCATTCTGA  
GGGGCCACAGTAATTACAACTTACTATCCGCCATCCCAT

ACATTGGGACAGACCTAGTTCAATGAATCTGAGGAGGCTACTCAGTAGACAGTCCCACCCTCACACGATTCTTTACCTTT  
CACTTCATCTTGCCTTTCATTATTGCAGCCCTAGCAGCAC  
TCCACCTCCTATTCTTGCACGAAACGGGATCAAACAACCCCTAGGAATCACCTCCCATTCCGATAAAATCACCTTCCAC  
CCTTACTACACAATCAAAGACACCCTCGGCTTACTTCTCT  
TCCTTCTCTCCTTAATGACATTAACACTATTCTCACCAGACCTCCTAGGCGACCCAGACAATTATACCCTAGCCAACCC  
TTAAACACCCCTCCCCACATCAAGCCCGAATGATATTTCC  
TATTGCGCTACACAATTCTCCGATCCGTCCCTAACAACTAGGAGGCGTCTTGGCCCTATTACTATCCATCCTCATCCTA  
GCAATAATCCCCATCCTCCATATATCCAAACAACAAAGCA  
TAATATTTGCGCCACTAAGCCAATCACTTTATTGACTCCTAGCCGCAGACCTCCTCATTCTAACCTGAATCGGAGGACAA  
CCAGTAAGCTACCCTTTTACCATCATTGGACAAGTAGCAT  
CCGTACTATACTTACAACAATCCTAATCCTAATACCAACTATCTCCCTAATTGAAAACAAAATACTCAAATGGGCCTGT  
CCTTGTAGTATAAACTAATACACCAGTCTTGTAAACCGGA  
GATGAAAACCTTTTTCCAAGGACAAATCAGAGAAAAAGTCTTTAACTCCACCATTAGCACCCAAAGCTAAGATTCTAATT  
TAAACTATT

#AFRICA Mkamba

CCACAGTTTTATGTAGCTTACCTCCTCAAAGCAATACACTGAAAATGTTTTAGACGGGCTCACATCACCCCATAAACAAATA  
GGTTTTGGTCTTAGCCTTTCTATTAGCTCTTAGTAAGATTA  
CACATGCAAGCATCCCCGTTCCAGTGAGTTACCCTCTAAATCACCACGATCAAAGGGACAAGCATCAAGCACGCAGCA  
ATGCAGCTCAAACGCTTAGCCTAGCCACACCCCCACGGG  
AAACAGCAGTGATTAACCTTTAGCAATAAACGAAAGTTTAACTAAGCTATACTAACCCAGGGTTGGTCAATTTCTGTGCC  
AGCCACCGCGGTACACGATTAACCCAAGTCAATAGAAGC  
CGGCGTAAAGAGTGTTTTAGATCACCCCTCCCCAATAAAGCTAAAACCTCACCTGAGTTGTAAAAAACTCCAGTTGACAC  
AAAATAGACTACGAAAGTGGCTTTAACATATCTGAACACA  
CAATAGCTAAGACCCAACTGGGATTAGATACCCCACTATGCTTAGCCCTAAACCTCAACAGTTAAATCAACAAAACCTGC  
TCGCCAGAACACTACGAGCCACAGCTTAAAACCTCAAAGGA  
CCTGGCGGTGCTTCATATCCCTCTAGAGGAGCCTGTTCTGTAATCGATAAACCCCGATCAACCTCACCCCTCTTGCTCA  
GCCTATATACCGCCATCTTCAGCAAACCCTGATGAAGCT  
ACAAAGTAAGCGCAAGTACCCACGTAAAGACGTTAGGTCAAGGTGTAGCCCATGAGGTGGCAAGAAATGGGCTACATTTT  
CTACCCAGAAAACCTACGATAGCCCTTATGAAAACCTAAGG  
GTCGAAGGTGGATTTAGCAGTAACTGAGAGTAGAGTGCTTAGTTGAACAGGGCCCTGAAGCGGTACACACCGCCCGTC  
ACCCTCCTCAAGTATACTTCAAAGGACATTTAACTAAAAC  
CCCTACGATTTATATAGAGGAGACAAGTCGTAACATGGTAAGTGTACTGGAAAGTGCACCTGGACGAACCAGAGTGTAG  
CTTAACACAAAGCACCCAACCTTACACTTAGGAGATTTCAA  
CTTAACTTGACCGCTCTGAGCTAAACCTAGCCCCAAACCCACTCCACCTTACTACCAGACAACCTTAAACCAAACCTTTA  
CCCAAATAAAGTATAGGCGATAGAAATTGAAACCTGGCGC  
AATAGATATAGTACCGCAAGGGAAAGATGAAAAATTATAACCAAGCATAATATAGCAAGGACTAACCCCTATACCTTCTG  
CATAATGAATTAAGTAACTAGAAATAACTTTGCAAGGAGAGCCA  
AAGCTAAGACCCCCGAAACCAGACGAGCTACCTAAGAACAGCTAAAAGAGCACACCCGTCTATGTAGCAAATAGTGGGA  
AGATTTATAGGTAGAGGCGACAAACCTACCGAGCCTGGTG  
ATAGCTGGTTGTCCAAGATAGAATCTTAGTTCAACTTTAAATTTGCCACAGAACCCTCTAAATCCCCTTGTAATTTAA  
CTGTTAGTCCAAGAGGAACAGCTCTTTGGACACTAGGAA  
AAAACCTGTAGAGAGAGTAAAAAA-  
TTTAACACCCATAGTAGGCCTAAAAGCAGCCACCAATTAAGAAAGCGTTCAAGCTCAACACCCACTACCTAAAAAA-  
TCCCAAACATATAACTG  
AACTCCTCACACCCAATTGGACCAATCTATCACCTATAGAAGAATAATGTTAGTATAAGTAACATGAAAACATTCTCC  
TCCGCATAAGCCTGCGTCAGATTAAAACACTGAACTGACA  
ATTAACAGCCCCAATATCTACAATCAACCAACAAGTCATTATTACCCTCACTGTCAACCCAACACAGGCATGCTCATAAGG  
AAAGGTTAAAAAAGTAAAAGGAACTCGGCAAATCTTACC  
CCGCCTGTTTACCAAAAACATCACCTCTAGCATCACAGTATTAGAGGCACCGCCTGCCAGTGACACATGTTTAAACGGC  
CGCGGTACCCTAACCGTGCAAAGGTAGCATAATCACTTGT  
TCCTTAAATAGGGACCTGTATGAATGGCTCCACGAGGGTTCAGCTGTCTCTTACTTTTTAACAGTGAAATTGACCTGCC  
GTGAAGAGGCGGGCATGACACAGCAAGACGAGAAGACCCT  
ATGGAGCTTTAATTTATTAATGCAAACAGTACCTAACAAACCCACAGGTCTAACTACCAAACCTGCATTAATAAATTTT  
GGTTGGGGCGACCTCGGAGCAGAACCCAACCTCCGAGCAG  
TACATGCTAAGACTTACCAGTCAAAGCGAACTACTATACTCAATTGATCCAATAACTTGACCAACGGAACAAGTTACCC  
TAGGGATAACAGCGCAATCCTATTCTAGAGTCCATATCAA

CAATAGGGTTTTACGACCTCGATGTTGGATCAGGACATCCCGATGGTGCAGCCGCTATTTAAAGGTTGTTTTGTTCAACGAT  
TAAAGTCTACGTGATCTGAGTTCAGACCCGGAGTAATCCA  
GGTCGGTTTTCTATCTACTTCAAATTCCTCCCTGTACGAAAGGACAAGAGAAATAAGGCCTACTTCACAAAGCGCCTTCCC  
CCGTAAATGATATCATCTCAACTTAGTATTATACCCACAC  
CCACCCAAGAACAGGGTTTTGTTAAGATGGCAGAGCCCCGGTAATCGCATAAACTTAAACTTTACAGTCAGAGGTTCAAT  
TCCTCTTCTTAAACAACATACCCATGGCCAACCTCCTACTC  
CTCATTGTACCCATTCTAATCGCAATGGCATTCTAATGCTTACCGAACGAAAAATTCTAGGCTATATACAACCTACGCAA  
AGGCCCAACGTTGTAGGCCCTACGGGCTACTACAACCC  
TTCGCTGACGCCATAAACTCTTCACCAAAGAGCCCCATAAAACCCGCCACATCTACCATCACCTCTACATCACCGCCCC  
GACCTTAGCTCTCACCATCGCTCTTCTACTATGAACCCCC  
CTCCCCATACCAACCCCTGGTCAACCTCAACCTAGGCCCTCTATTTATTCTAGCCACCTCTAGCCTAGCCGTTTACTC  
AATCCTCTGATCAGGGTGAGCATCAAACCTCAAACCTACGCC  
CTGATCGGCGCACTGCGAGCAGTAGCCCAAACAATCTCATATGAAGTCACCCTAGCCATCATTCTACTATCAACATTACT  
AATAAGTGGCTCCTTTAACCTCTCCACCCTTATCACAACA  
CAAGAACACCTCTGATTACTCCTGCCATCATGACCCTTGGCCATAATATGATTTATCTCCACACTAGCAGAGACCAACCG  
AACCCCTTCGACCTTGCCGAAGGGGAGTCCGAACCTAGTC  
TCAGGCTTCAACATCGAATACGCCGAGGCCCTTCGCCCTATTCTTCATAGCCGAATACACAAACATTATTATAATAAA  
CACCTCACCACTACAATCTTCTAGGAACAACATATGAC  
GCACTCTCCCTGAACTCTACACAACATATTTTGTACCAAGACCCTACTTCTAACCTCCCTGTTCTTATGAATTCGAAC  
AGCATAACCCCGATTCCGCTACGACCAACTCATAACCTC  
CTATGAAAAAATTCCTACCCTCACCTAGCATTACTTATATGATATGTCTCCATACCCATTACAATCTCCAGCATTCC  
CCCTCAAACCTAAGAAATATGTCTGATAAAAGAGTTACTT  
TGATAGAGTAAATAATAGGAGCTTAAACCCCTTATTTCTAGGACTATGAGAATCGAACCCATCCCTGAGAATCCAAAAT  
TCTCCGTGCCACCTATCGCACCCCATCCTAAAGTAAGGT  
AGCTAAATAAGCTATCGGGCCATACCCCGAAAATGTTGGTTATACCCCTTCCCGTACTAATTAATCCCTGGCCCAACCC  
GTCATCTACTCTACCATCTTTGCAGGCACACTCATCACAG  
CGCTAAGCTCGCACTGATTTTTTACCTGAGTAGGCCTAGAAATAAACATGCTAGCTTTTTATTCCAGTTCTAACCAAAAA  
ATAAACCTCGTTCCACAGAAGCTGCCATCAAGTATTTCC  
TCACGCAAGCAACCGCATCCATAATCCTTCTAATAGCCATCCTCTTCAACAATATACTCTCCGGACAATGAACCATAACC  
AATACTACCAACCAATACTCATCATTATAATAATCATAATGG  
CTATAGCAATAAACTAGGAATAGCCCCCTTTCACCTCTGAGTCCCAGAGGTTACCCAAGGCACCCCTCTGACATCCGGC  
CTGCTTCTTCTCACATGACAAAACTAGCCCCCATCTCAA  
TCATATACCAAATCTCTCCCTCACTAAACGTAAGCCTTCTCCTCACTCTCTCAATCTTATCCATCATAGCAGGCAGTTGA  
GGTGGATTAAACCAAACCCAGCTACGCAAAATCCTAGCAT  
ACTCCTCAATTACCCACATAGGATGAATAATAGCAGTTCTACCGTACAACCCTAACATAACCATTCTTAATTTAACTATT  
TATATTATCCTAACTACTACCGCATTCTACTACTCAACT  
TAAACTCCAGCACCACGACCCTACTACTATCTCGCACCTGAAACAAGCTAACATGACTAACACCCTTAATTCCATCCACC  
CTCCTCTCCCTAGGAGGCCTGCCCCGCTAACCGGCTTTT  
TGCCCAAATGGGCCATTATCGAAGAATTCACAAAAACAATAGCCTCATTATCCCCACCATCATAGCCACCATCACCTC  
CTTAACCTCTACTTCTACCTACGCCTAATCTACTCCACCT  
CAATCACACTACTCCCATATCTAACAACGTAATAAATAAATGACAGTTTGAACATACAAAACCCACCCCATTCCTCCCC  
ACACTCATCGCCCTTACCACGCTACTCCTACCTATCTCCC  
CCTTTATACTAATAATCTTATAGAAATTTAGGTTAAATACAGACCAAGAGCCTTCAAAGCCCTCAGTAAGTTGCAATACT  
TAATTTCTGTAACAGCTAAGGACTGCAAAACCCACTCTG  
CATCAACTGAACGCAATCAGCCACTTTAATTAAGCTAAGCCCTTACTAGACCAATGGGACTTAAACCCACAAACACTTA  
GTTAACAGCTAAGCACCTAATCAACTGGCTTCAATCTAC  
TTCTCCCGCCCGGGAAAAAAGGCGGGAGAAGCCCCGGCAGGTTTGAAGCTGCTTCTTTCGAATTTGCAATTC AATATGA  
AAATCACCTCGGAGCTGGTAAAAAGAGGCCTAACCCCTGT  
CTTTAGATTTACAGTCCAATGCTTCACTCAGCCATTTTACCTCACCCCC-  
ACTGATGTTGCGCCAGCGTTGACTATTCTCTACAAACCACAAAGACATTGGAACACTATACCTATTATTC  
GGCGCATGAGCTGGAGTCTTAGGCACAGCTCTAAGCCTCCTTATTCGAGCCGAGCTGGGCCAGCCAGGCAACCTTCTAGG  
TAACGACCACATCTACAACGTTATCGTACAGCCCATGCA  
TTTGTAATAATCTTCTTCATAGTAATACCCATCATAATCGGAGGCTTTGGCAACTGACTAGTTCCCTAATAATCGGTGC  
CCCCGATATGGCGTTTTCCCGCATAAACAACATAAGCTTC  
TGACTCTTACCTCCCTCTCTCCTACTCCTGCTCGCATCTGCTATAGTGGAGGCCGGAGCAGGAACAGGTTGAACAGTCTA  
CCCTCCCTTAGCAGGGAACCTACCACCTGGAGCCTCC

GTAGACCTAACCATCTTCTCCTTACACCTAGCAGGTGTCTCCTCTATCTTAGGGGCCATCAATTTTCATCACAACAATTAT  
CAATATAAAACCCCTGCCATAACCCAATACCAAACGCC  
CTCTTCGTCTGATCCGTCTAATCACAGCAGTCTACTTCTCCTATCTCTCCAGTCTTAGCTGCTGGCATCACTATACT  
ACTAACAGACCGCAACCTCAACACCACCTTCTTCGACCCC  
GCCGGAGGAGGAGACCCATTCTATACCAACACCTATTCTGATTTTTTCGGTACCCTGAAGTTTATATTCTTATCCTACC  
AGGCTTCGGAATAATCTCCCATATTGTAACCTTACTACTCC  
GGAAAAAAGAACCATTTGGATACATAGGTATGGTCTGAGCTATGATATCAATTGGCTTCTTAGGGTTTATCGTGTGAGC  
ACACCATATATTTACAGTAGGAATAGACGTAGACACACGA  
GCATATTTACCTCCGCTACCATAATCATCGCTATCCCCACCGCGTCAAAGTATTTAGCTGACTCGCCACACTCCACGG  
AAGCAATATGAAATGATCTGCTGCAGTGTCTGAGCCCTA  
GGATTCATCTTTCTTTTACCCTAGGTGGCCTGACTGGCATTGTATTAGCAAACCTCATCACTAGACATCGTACTACACGA  
CACGTACTACGTTGTAGCTCACTTCCACTATGTCCTATCA  
ATAGGAGCAGTATTTGCCATCATAGGAGGCTTCATTCACTGATTTCCCTATTCTCAGGCTACACCCTAGACCAAACCTA  
CGCCAAAATCCATTTCACTATCATATTCATCGGCGTAAAT  
CTAACTTTCTTCCACAACACTTTCTCGGCCTATCCGGAATGCCCGACGTTACTCGGACTACCCCGATGCATACACCAC  
ATGAAACATCCTATCATCTGTAGGCTCATTCAATTTCTCTA  
ACAGCAGTAATATTAATAATTTTCATGATTTGAGAAGCCTTCGCTTGAAGCGAAAAGTCTAATAGTAGAAGAACCCTC  
CATAAACCTGGAGTACTATATGGATGCCCCCACCCTAC  
CACACATTCGAAGAACCCGTATACATAAAAATCTAGACAAAAAGGAAGGAATCGAACCCCCAAAGCTGGTTTTCAAGCCA  
ACCCCATGGCCTCCATGACTTTTTCAAAAAGGTATTAGAA  
AAACCATTTATAACTTTGTCAAAGTTAAATTATAGGCTAAATCCTATATATCTTAATGGCACATGCAGCGCAAGTAGGT  
CTACAAGACGCTACTTCCCCTATCATAGAAGAGCTTATCA  
CCTTTTCATGATCACGCCCTCATAATCATTTTCTTATCTGCTTCTTAGTCTGTATGCCCTTTTCTAACACTCACAACA  
AAACTAACTAATACTAACATCTCAGACGCTCAGGAAATAG  
AAACCGTCTGAACTATCCTGCCCGCCATCATCCTAGTCTCATCGCCCTCCCATCCCTACGCATCCTTTACATAACAGAC  
GAGGTCAATGACCCCTCCCTTACCATCAAATCAATTGGCC  
ACCAATGGTACTGAACCTACGAGTACACCGACTACGGCGGACTAATCTTCAACTCCTACATACTTCCCCATTATTCTTA  
GAACCAGGCGACCTGCGACTCCTTGACGTTGACAATCGAG  
TAGTACTCCCATTGAACCCCTTCTGTATAATAATTACATCACAAGACGCTTTCGACTCATGAGCTGTCCCCACATTA  
GGCTTAAAAACAGATGCAATTTCCCGGACGTCTAAACCAA  
CCACTTTACCGCTACACGACCGGGGTATACTACGGTCAATGCTCTGAAATCTGTGGAGCAAACCACAGTTTTCATGCC  
ATCGTCTAGAATTAATTTCCCTAAAAATCTTTGAAATAG  
GGCCCGTATTTACCCTATAGCACCCCTCTACCCCTCTAGAGCCACTGTAAAGCTAACTTAGCATTAACCTTTTAAAGT  
TAAAGATTAAGAGAACCAACACCTCTTTACAGTGAAATGC  
CCCACTAAATACTACCGTATGGCCACCATAATTACCCCTACTCCTTACACTATTCTCATACCCCACTAAAAATA  
TTAAACACAAACTACCACCTACCTCCCTCACCAAAGCCCA  
TAAAAATAAAAAATTATAACAAACCCTGAGAACCAAAATGAACGAAAATCTGTTTCGCTTCACTTATTGCCCCACAATCC  
TAGGCCTACCCGCCGAGTACTGATCATTCTATTTCCCC  
TCTATTGATCCCCACCTCAAATATCTCATCAACAACCGACTAATCACCACCAACAATGACTAATCAAACCTAACCTCAA  
AACAAATGATAGCCATACACAACACTAAAGGACGAACCTG  
ATCTCTTATACTAGTATCCTTAATCATTTTTATTGGCACAACCTAACCTCCTAGGACTCCTGCCTCACTCATTTACACCAA  
CCACCCAACTATCTATAAACCTAGCCATGGCCATCCCCTT  
ATGAGCGGGCGCAGTGATTATAGGCTTTTCGCTCTAAGATTAATAATGCCCTAGCCACTTCTTACCACAAGGCACACCTA  
CACCCCTTATCCCTATACTAGTTATTATCGAAACCATCAG  
CCTACTCATTCAACCAATAGCCCTGGCCGTACGCCTAACCGCTAACATTACTGCAGGCCACCTACTCATGCACCTAATTG  
GAAGCGCCACCCTAGCAATATCAACCATTAACCTTCCCTC  
TACACTTATCATCTTACAATTCTAATTCTACTGACTATCCTAGAAATCGTGTGCGCTTAAATCCAAGCCTACGTTTTCA  
CACTTCTAGTAAGCCTCTACCTGCACGACAACACATAATG  
ACCCACCAATCACATGCCTATCATATAGTAAACCCAGCCCATGACCCCTAACAGGGGCCCTCTCAGCCCTCCTAATGAC  
CTCCGGCCTAGCCATGTGATTTCACTTCCACTCCATAACG  
CTCCTCATACTAGGCCTACTAACCAACACACTAACCATATACCAATGATGGCGCGATGTAACACGAGAAAGCACATACCA  
AGGCCACCACACACCACCTGTCCAAAAAGGCCTTCGATAC  
GGGATAATCCTATTTATTACCTCAGAAGTTTTTTTTCTTCGAGGATTTTTCTGAGCCTTCTACCACTCCAGCCTAGCCCC  
TACCCCAACTAGGAGGGCACTGGCCCCAACAGGCATC  
ACCCCACTAAATCCCCTAGAAGTCCCCTCCTAAACACATCCGTATTACTCGCATCAGGAGTATCAATCACCTGAGCTCA  
CCATAGTCTAATAGAAAACAACCGAAACCAATAATTCAA

GCCTGCTTATTACAATTTTACTGGGTCTCTATTTTACCCTCCTACAAGCCTCAGAGTACTTCGAGTCTCCCTTCACCAT  
TTCCGACGGCATCTACGGCTCAACATTTTTTGTAGCCACA  
GGCTTCCACGGACTTCACGTCATTATTGGCTCAACTTTTCTCACTATCTGCTTCATCCGCCAACTAATATTTCACTTTAC  
ATCCAAACATCACTTTGGCTTCGAAGCCGCCGCTGATAC  
TGGCATTGTTGTAGATGTGGTTTACTATTTCTGTATGTCTCCATCTATTGATGAGGGTCTTACTCTTTTAGTATAAATAG  
TACCGTTAACTTCCAATTAAGTATTTTGGACAACATTTCAA  
AAAAGAGTAATAAACTTCGCCTTAATTTTAATAATCAACACCCTCCTAGCCTTACTACTAATAATTATTACATTTTACT  
ACCACAACCTCAACGGCTACATAGAAAAATCCACCCCTTAC  
GAGTGCAGCTTCGACCCTATATCCCCACCCGCGTCCCTTTCTCCATAAAATTCTTCTTAGTAGCTATTACCTTCTTATT  
ATTTGATCTAGAAAATTGCCCTCCTTTTACCCTTACCATGA  
GCCCTACAACAACCTAACCTGCCACTAATAGTTATGTTCATCCCTCTTATTAATCATCATCTAGCCCTAAGTCTGGCCTA  
TGAGTGACTACAAAAGGATTAGACTGAGCCGAATTGGTA  
TATAGTTTAAACAAAACGAATGATTTTCGACTCATTAAATTATGATAATCATATTTACCAAATGCCCTCATTACATAAA  
TATTATACTAGCATTACCATCTCACTTCTAGGAATACTA  
GTATATCGCTCACACCTCATATCCTCCCTACTATGCCTAGAAGGAATAATACTATCGCTGTTTATTATAGCTACTCTCAT  
AACCTCAACACCCACTCCCTCTTAGCCAATATTGTGCCT  
ATTGCCATACTAGTCTTTGCCGCTGCGAAGCAGCGGTGGGCTAGCCCTACTAGTCTCAATCTCCAACACATATGGCCT  
AGACTACGTACATAACCTAAACCTACTCCAATGCTAAAAC  
TAATCGTCCCAACAATTATATTACTACCACTGACATGACTTTCCAAAAACACATAATTTGAATCAACACAACCACCCAC  
AGCCTAATTATTAGCATCATCCCCCTACTATTTTTTAAAC  
AAATCAACAACAACCTATTTAGCTGTTCCCAACCTTTTCTCCGACCCCTAACAAACCCCTCCTAATACTAACTACC  
TGACTCCTACCCCTCACAATCATGGCAAGCCAACGCCACT  
TATCCAGTGAACCACTATCACGAAAAAACTCTACCTCTCTATACTAATCTCCCTACAAATCTCCTTAATTATAACATTC  
ACAGCCACAGAATAATCATATTTTATATCTTCTTCGAAA  
CCACACTTATCCCCACCTTGGCTATCATCACCCGATGAGGCAACCAGCCAGAACGCCTGAACGCAGGCACATACTTCCTA  
TTCTACACCCTAGTAGGCTCCCTTCCCCTACTCATCGCAC  
TAATTTACTACTACAACACCCTAGGCTCACTAAACATTCTACTACTACTCTCACTGCCCCAAGAACTATCAAACCTCCTGA  
GCCAACAATAATATGACTAGCTTACACAATAGCTTTTA  
TAGTAAAAAATACTCTTTACGGACTCCACTTATGACTCCCTAAAGCCCATGTGCAAGCCCCCATCGCTGGGTCAATAGTA  
CTTGGCCGAGTACTCTTAAACTAGGCGGCTATGGTATAA  
TACGCCTCACACTCATTCTCAACCCCTGACAAAACACATAGCCTACCCCTTCTTGTACTATCCCTATGAGGCATAATT  
ATAACAAGCTCCATCTGCCTGCGACAAAACAGACCTAAAAT  
CGCTCATTGCATACTCTTCAATCAGCCACATAGCCCTCGTAGTAACAGCCATTCTCATCCAAACCCCTGAAGCTTACC  
GGCGCAGTCACTTCTCATAATCGCCCACGGACTTACATCCT  
CATTACTATTCTGCCTAGCAAACCTCAAACCTACGAACGCCTCACAGTCGCATCATAATCCTCTCTCAAGGACTTCAAACCT  
CTACTCCCACTAATAGCTTTTTTGTAGTACTTCTAGCAAGCC  
TCGCTAACCTCGCCTTACCCCTACTATTAACCTACTGGGAGAATCTCTGTGCTAGTAACCACGTTCTCCTGATCAAAT  
ATCACTCTCCTACTTACAGGACTCAACATACTAGTCACAG  
CCCTATACTCCCTCTACATATTTACCACAACACAATGGGGCTCACTCACCCACCACATTAACAACATAAAACCCCTCATTC  
ACACGAGAAAACACCCTCATGTTTATACACCTATCCCCCA  
TTCTCCTCCTATCCCTCAACCCCGACATCATTACCGGGTTTTTCTCTTGTAAATATAGTTTTAACAAAACATCAGATTGT  
GAATCCGACAACAGAGGCTTACGACCCCTTATTTACCGAG  
AAAGCTCACAAGAAGTGAATCATAACCCCATGTCTAACAACATGGCTTTCTCAACTTTTAAAGGATAACAGCTATCC  
ATTGGTCTTAGGCCCCAAAAATTTTGGTGCAACTCCAAAT  
AAAAGTAATAACCATGCACACTACTATAACCACCCTAACCCCTGACTTCCCTAATTCCCCCATCCTTACCACCCTCGTTA  
ACCCTAACAACAAAAAACTCATAACCCCTATTATGTAAAATC  
CATTGTGCGATCCACCTTTATTATCAGTCTCTTCCCCACAACAATATTATCATGTGCTAGACCAAGAAGTCAATTATCTCGA  
ACTGACACTGAGCCACAACCCAAACAACCCAGCTCTCCCT  
AAGCTTCAAACCTAGACTACTTCTCCATAATATTATCCCTGTAGCATTGTTGTTACATGGTCCATCATAGAATTCTCAC  
TGTGATATATAAACTCAGACCCAAACATTAATCAGTTCTT  
CAAATATCTACTCATTTCCTAATTACCATACTAATCTTAGTTACCGCTAACAAACCTATTCCAACCTGTTTATCGGCTGAG  
AGGGCGTAGGAATTATATCCTTCTTGTCTCATCAGTTGATG  
ATACGCCCGAGCAGATGCCAACACAGCAGCCATTCAAGCAATCCTATACAACCGTATCGGCGATATCGGTTTATCCTCG  
CCTTAGCATGATTTATCCTACTCCAACCTCATGAGACCC  
ACAACAATAGCCCTTCTAAACGCTAATCCAAGCCTCACCCACTACTAGGCTCCTCCTAGCAGCAGCGGGCAAATCAG  
CCCAATTAGGTCTCCACCCCTGACTCCCTCAGCCATAGA

AGGCCCCACCCAGTCTCAGCCCTACTCCACTCAAGCACTATAGTTGTAGCAGGAATCTTCTTACTCATCCGCTTCCACC  
CCCTAGCAGAAAATAGCCCACTAATCCAAACTCTAACACT  
ATGCTTAGGCGCTATCACCCTCTGTTTCGAGCAGTCTGCGCCCTTACACAAAATGACATCAAAAAAATCGTAGCCTTCT  
CCACTTCAAGTCAACTAGGACTCATAATAGTTACAATCGG  
CATCAACCAACCACACCTAGCATTCTGCACATCTGTACCACGCCTTCTTCAAAGCCATACTATTTATGTGCTCCGGGT  
CCATCATCCACAACCTTAACAATGAACAAGATATTCGAAA  
AATAGGAGGACTACTCAAACCATACTCTCACTTCAACCTCCCTCACCATTGGCAGCCTAGCATTAGCAGGAATACCTT  
TCCTCACAGGTTTCTACTCCAAAGACCACATCATCGAAAC  
CGCAAACATATCATAACAAACGCCTGAGCCCTATCTATTACTCTCATCGCTACCTCCCTGACAAGCGCCTATAGCACTC  
GAATAATTCTTCTCACCTAACAGGTCAACCTCGCTTCCC  
CACCTTACTAACATTAACGAAAATAACCCACCTACTAAACCCATTAAACGCCTGGCAGCCGGAAGCCTATTTCGAG  
GATTTCTCATTACTAACAAACATTTCCCCCGCATCCCCCTT  
CCAAACAACAATCCCCCTCTACCTAAAACCTCACAGCCCTCGCTGTCACTTTCTAGGACTTCTAACAGCCCTAGACCTCA  
ACTACCTAACCAACAAACTTAAAATAAAATCCCCACTATG  
CACATTTTATTTCTCCAACATACTCGGATTCTACCCTAGCATCACACACCCGCACAATCCCCTATCTAGGCCTTCTTACGA  
GCCAAAACCTGCCCTACTCCTCCTAGACCTAACCTGACT  
AGAAAAGCTATTACCTAAAACAATTTACAGCACCAAATCTCCACCTCCATCATCACCTCAACCCAAAAAGGCATAATTA  
AACTTTACTTCTCTCTTTCTTCTTCCCCTCATCCTAAC  
CCTACTCCTAATCACATAACCTATTCCCCGAGCAATCTCAATTACAATATATACACCAACAAACAATGTTCAACCAGTA  
ACTACTACTAATCAACGCCATAATCATACAAAGCCCCCG  
CACCAATAGGATCCTCCCGAATCAACCCTGACCCCTCTCCTTCATAAATTATTTCAGCTTCTTACACTATTAAAGTTTACC  
ACAACCACCACCCCATCATACTCTTTCACCCACAGCACCA  
ATCCTACCTCCATCGCTAACCCCACTAAAACACTCACCAAGACCTCAACCCCTGACCCCATGCCTCAGGATACTCCTCA  
ATAGCCATCGCTGTAGTATATCCAAAGACAACCATCATT  
CCCCTAAATAAATTAATAAACTATTAAACCCATATAACCTCCCCAAAATTTCAGAATAATAACACACCCGACCACACCG  
CTAACAAATCAATACTAAGCCCCATAAATAGGAGAAGGCT  
TAGAAGAAAACCCACAAACCCATTACTAAACCCACACTCAACAGAAAACAAAGCATAACATCATTATTCTCGCACGGACT  
ACAACCACGACCAATGATATGAAAAACCATCGTTGTATTT  
CAACTACAAGAACACCAATGACCCCAATACGCAAAATTAACCCCTAATAAAATTAATTAACCACTCATTTCATCGACCTC  
CCCACCCATCCAACATCTCCGCATGATGAAACTTCGGCT  
CACTCCTTGGCGTCTGCCTGATCCTCCAAATCACCACAGGACTATTCTAGCCATGCACTACTCACCAGACGCCTCAACC  
GCCTTTTTCATCAATCGCCACATCACTCGAGACGTAAATT  
ATGGCTGAATCATCCGCTACCTTCACGCCAATGGCGCCTCAATATTCTTTATCTGCCTCTTCTTACACATCGGGCGAGGC  
CTATATTACGGATCATTCTCTACTCAGAAACCTGAAACA  
TCGGCATTATCCTCCTGCTTGCAACTATAGCAACAGCCTTCATAGGCTATGTCTCCCGTGAGGCCAAATATCATTCTGA  
GGGGCCACAGTAATTACAACTTACTATCCGCCATCCCAT  
ACATTGGGACAGACCTAGTTCAATGAATCTGAGGAGGCTACTCAGTAGACAGTCCCACCCTCACACGATTCTTTACCTTT  
CACTTCATCTTACCCTTCATTATTGCAGCCCTAGCAGCAC  
TCCACCTCCTATTCTTGCACGAAACGGGATCAAACAACCCCTAGGAATCACCTCCCATTCCGATAAAATCACCTTCCAC  
CCTTACTACACAATCAAAGACGCCCTCGGCTTACTTCTCT  
TCCTTCTCTCCTTAATGACATTAACACTATTCTCACCAGACCTCCTAGGCGACCCAGACAATTATACCCTAGCCAACCC  
TTAAACACCCCTCCCCACATCAAGCCCGAATGATATTTCC  
TATTGCCTACACAATTCTCCGATCCGTCCCTAACAACTAGGAGGCGTCTTGGCCCTATTACTATCCATCCTCATTCTA  
GCAATAATCCCCATCCTCCATATATCCAAACAACAAAGCA  
TAATATTTGCCCCACTAAGCCAATCACTTTATTGACTCCTAGCCGCAGACCTCCTCATTCTAACCTGAATCGGAGGACAA  
CCAGTAAGCTACCCTTTTACCATCATTGGACAAGTAGCAT  
CCGTACTATACTTACAACAATCCTAATCCTAATACCAACTATCTCCCTAATTGAAAACAAAATACTCAAATGGGCCTGT  
CCTTGTAGTATAAACTAATACACCAGTCTTGTAAACCGGA  
GATGAAAACCTTTTTCCAAGGACAAATCAGAGAAAAAGTCTTTAACTCCACCATTAGCACCCAAAGCTAAGATTCTAATT  
TAAACTATT

#AFRICA San

CCACAGTTTATGTAGCTTACCTCCTCAAAGCAATACACTGAAAATGTTTGTAGACGGGCTCACATCACCCCATAAACAATA  
GGTTTGGTCTTAGCCTTTCTATTAGCTCTTAGTAAGATTA  
CACATGCAAGCATCCCCGTTCCAGTGAGTTACCCTCTAAATCACCACGATCAAAGGGACAAGCATCAAGCACGCAACA  
ATGCAGCTCAAACGCTTAGCCTAGCCACACCCCCACGGG

AAACAGCAGTGATAAACCTTTAGCAATAAACGAAAGTTCAACTAAGCTATACTAACCCCAGGGTTGGTCAATTTTCGTGCC  
AGCCACCGCGGTACACGATTAACCCAAGTCAATAGAAGC  
CGGCGTAAAGAGTGTTTTAGATCACCCCTCCCCAATAAAGCTAAAACCTCACCTGAGTTGTAAAAACTCCAGTTGACAC  
AAAATAAACTACGAAAGTGGCTTTAACATATCTGAATACA  
CAATAGCTAAGACCCAAACTGGGATTAGATACCCCACTATGCTTAGCCCTAAACCTCAACAGTTAAATCAACAAAACCTGC  
TCGCCAGAACACTACGAGCCACAGCTTAAAACCTCAAAGGA  
CCTGGCGGTGCTTCATATCCCTCTAGAGGAGCCTGTTCTGTAATCGATAAACCCCGATCAACCTCACCACCCCTTGCTCA  
GCCTATATACCGCCATCTTCAGCAAACCCTGATGAAGGCT  
ACAAAGTAAGCGCAAGTACCCACGTAAAGACGTTAGGTCAAGGTGTAGCCCATGAGGTGGCAAGAAATGGGCTACATTTT  
CTACCCAGAAAACCTACGATAGCCCTTATGAAAACCTAAGG  
GTGGAAGGTGGATTTAGCAGTAAACTGAGAGTAGAGTGCTTAGTTGAACAGGGCCCTGAAGCGGTACACACCGCCCGTC  
ACCCTCCTCAAGTATACTTCAAAGGACATTTAACTAAAAC  
CCCTACGCATTTATATAGAGGAGACAAGTCGTAACATGGTAAGTGTACTGGAAAAGTGCACCTTGACGAACCAGAGTGTAG  
CTTAACACAAAAGCACCCAACTTACACTTAGGAGATTTCAA  
CTTAACCTTGACCGCTCTGAGCTAAACCTAGCCCCAAACCCACTCCACCTTACTACCAGACAACCTTAGCCAAACCATTTA  
CCCAAATAAAGTATAGGCGATAGAAATTGAAACCTGGCGC  
AATAGATATAGTACCGCAAGGGAAAGATGAAAAATTATAACCAAGCATAATATAGCAAGGACTAACCCCTATACCTTCTG  
CATAATGAATTAAGTAACTAGAAATAACTTTGCAAGGAGAGCCA  
AAGCTAAGACCCCCGAAACCAGACGAGCTACCTAAGAACAGCTAAAAGAGCACACCCCGTCTATGTAGCAAAAATAGTGGGA  
AGATTTATAGGTAGAGGCGACAAACCTACCGAGCCTGGTG  
ATAGCTGGTTGTCCAAGATAGAATCTTAGTTCAACTTTAAATTTGCCACAGAACCCTCTAAATCCCCTTGTAATTTAA  
CTGTTAGTCCAAGAGGAACAGCTCTTTGGACACTAGGAA  
AAAACCTTGTAGAGAGAGTAAAAAA-  
TTTAACACCCATAGTAGGCCTAAAAGCAGCCACCAATTAAGAAAGCGTTCAAGCTCAACACCCACTACCTAAAAAA-  
TCCCAAACATATAACTG  
AACTCCTCACACCCAATTGGACCAATCTATCACCCCTATAGAAGAATAATGTTAGTATAAGTAACATGAAAACATTCTCC  
TCCGCATAAGCCTGCGTCAGATTAACCAACTGAACTGACA  
ATTAACAGCCCAATATCTACAATCAACCAACAAGTCATTATTACCCTCACTGTCAACCCAACACAGGCATGCTCATAAGG  
AAAGGTTAAAAAAGTAAAAGGAACCTCGGCAAACTTTACC  
CCGCCTGTTTACCAAAAACATCACCTCTAGCATCACAGTATTAGAGGCACCGCCTGCCAGTGACACATGTTTAAACGGC  
CGCGGTACCCTAACCGTGCAAAGGTAGCATAATCACTTGT  
TCCTTAAATAGGGACCTGTATGAATGGCTCCACGAGGGTTTAGCTGTCTCTTACTTTTAAACCAGTGAAATTGACCTGCC  
GTGAAGAGGCGGGCATGACACAGCAAGACGAGAAGACCT  
ATGGAGCTTTAATTTATTAATGCAAACAATACCTAACAAACCCACAGGTCTTAACTACCAAACCTGCATTAATAAATTT  
GGTTGGGGCGACCTCGGAGCAGAACCAAACCTCCGAGCAG  
TACATGCTAAGACTTCACCAGTCAAAGCGAACTACCATACTCAATTGATCCAATAACTTGACCAACGGAACAAGTTACCC  
TAGGGATAACAGCGCAATCCTATTCTAGAGTCCATATCAA  
CAATAGGGTTTACGACCTCGATGTTGGATCAGGACATCCCGATGGTGCAGCCGCTATTAAGGTTTCGTTTGTTCACGAT  
TAAAGTCTACGTGATCTGAGTTCAGACCGGAGTAATCCA  
GGTCGGTTTCTATCTACTTCAAATTCCTCCCTGTACGAAAGGACAAGAGAAATAAGGCCTACTTCACAAAGCGCCTTCCC  
CCGTAAATGATATCATCTCAACTTAGTATTATACCCACAC  
CCACCCAAGAACAGGGTTTGTAAAGATGGCAGAGCCCGGTAATCGCATAAACTTAAAACCTTTACAGTCAGAGGTTCAAT  
TCCTCTTCTTAAACAACATACCCATGGCCAACCTCCTACTC  
CTCATTGTACCCATTCTAATCGCAATGGCATTCTAATGCTTACCGAACGAAAAATTCTAGGCTATATACAACCTACGCAA  
AGGCCCAACGTTGTAGGCCCTACGGGCTACTACAACCC  
TTCGCTGACGCCATAAACTCTTACCAAAGAGCCCCTAAAACCCGCCACATCTACCATCACCTATACATCACCGCCCC  
GACCTTAGCTCTCACCATCGCTCTTCTACTATGAACCCCC  
CTCCCCATACCAACCCCTGGTTAACCTCAACCTAGGCCTCCTATTTATTCTAGCCACCTCTAGCCTAGCCGTTTACTC  
AATCCTCTGATCAGGGTGAGCATCAAACCTCAAACCTACGCC  
CTGATCGGGCGACTGCGAGCAGTAGCCCAAACAATCTCATATGAAGTACCCTAGCCATCATTCTACTATCAACATTACT  
AATAAGTGGCTCCTTTAACCTCTCCACCCTTATCACAACA  
CAAGAACACCTCTGATTACTCCTGCCATCATGACCCTTGCCATAATATGATTTATCTCCACACTAGCAGAGACCAACCG  
AACCCCTTCGACCTTGCCGAAGGGGAGTCCGAACCTAGTC  
TCAGGCTTCAACATCGAATACGCCGAGGCCCTTCGCCCTATTCTTCATAGCCGAATACACAAACATTATTATAATAAA  
CACCCCTCACCACTACAATCTTCTAGGAACAACATATGAC  
GCACTCTCCCCTGAACTCTACACAACATATTTTGTACCAAGACCCTACTTCTGACCTCCCTGTTCTTATGAATTCGAAC  
AGCATACCCCGATTCCGCTACGACCAACTCATAACCTC

CTATGAAAAAATTCTTACCCTCACCTAGCATTACTTATATGATATGTCTCCATACCCATTACAATCTCCAGCATTCC  
CCCTCAAACCTAAGAAATATGTCTGATAAAAGAGTTACTT  
TGATAGAGTAAATAATAGGAGTTTAAACCCCCTTATTTCTAGGACTATGAGAATCGAACCCATCCCTGAGAATCCAAAAT  
TCTCCGTGCCACCTATCACACCCCATCCTAAAGTAAGGTC  
AGCTAAATAAGCTATCGGGCCATACCCCGAAAATGTTGGTTATACCCCTCCCGTACTAATTAATCCCCTGGCCCAACCC  
GTCATCTACTCTACCATCTTTGCAGGCACACTCATCACAG  
CGCTAAGCTCACACTGATTTTTTACCTGAGTAGGCCTAGAAATAAACATGCTAGCCTTTATTCCAGTTCTAACCAAAAA  
ATAAACCTCGTTCACAGAAGCTGCCATCAAGTATTTCC  
TCACGCAAGCAACCGCATCCATAATCCTTCTAATAGCTATCCTCTTCAACAATATACTCTCCGGACAATGAACCATAACC  
AATACTACCAATCAATACTCATCATTAAATAATCATAATGG  
CTATAGCAATAAAACTAGGAATAGCCCCCTTTCACTTCTGAGTCCCAGAGGTTACCCAAGGCACCCCTCTGACATCCGGC  
CTGCTTCTTCTCACATGACAAAAACTAGCCCCCATCTCAA  
TCATATAACCAATCTCCCCCTCACTAAACGTAAGCCTTCTCCTCACTCTCTCAATCTTATCCATCATAGCAGGCAGTTGA  
GGTGGATTAACCAAAACCCAGCTACGCAAAATCTTAGCAT  
ACTCCTCAATTACCCACATAGGATGAATAATAGCAGTTCTACCGTACAACCCTAACATAACCATTCTTAATTTAACTATT  
TATATTATCCTAACTACTACCGCATTCTACTACTCAACT  
TAAACTCCAGCACCACGACCCTACTACTATCTCGCACCTGAAACAAGCTAACATGACTAACACCCTTAATTCCATCCACC  
CTCCTCTCCCTAGGAGGCCTGCCCCGCTAACCGGCTTTT  
TGCCCAAATGGGCCATTATCGAAGAATTCACAAAAACAATAGCCTCATCATCCCCACCATCATAGCCACCATCACCCCTC  
CTTAACCTCTACTTCTACCTACGCCTAATCTACTCCACCT  
CAATCACACTACTCCCATATCTAACAACGTA AAAATAAAATGACAGTTTGAACATACAAAACCCACCCCACTCCTCCCC  
ACACTCATCGCCCTTACCACGCTACTCCTACCTATCTCCC  
CTTTTATACTAATAATCTTATAGAAATTTAGGTTAAATACAGACCAAGAGCCTTCAAAGCCCTCAGTAAGTTGCAATACT  
TAATTTCTGTAACAGCTAAGGACTGCAAAACCCCACTCTG  
CATCAACTGAACGCAAAATCAGCCACTTTAATTAAGCTAAGCCCTTACTAGACCAATGGGACTTAAACCCACAAACACTTA  
GTAAACAGCTAAGCACCCCTAATCAACTGGCTTCAATCTAC  
TTCTCCCGCCGCGGGAAAAAAGGCGGGGAGAAGCCCCGGCAGGTTTGAAGCTGCTTCTTCGAATTTGCAATTC AATATGA  
GAATCACCTCGGAGCTGGTAAAAAGAGGCCTAACCCCTGT  
CTTTAGATTTACAGTCCAATGCTTCACTCAGCCATTTTACCTCACCCCTC  
ACTGATGTTTCGCCGACCCTGACTATTCTCTACAAACCACAAAGACATTGGAACACTATACTATTATTC  
GGCGCATGAGCTGGAGTCTTAGGCACAGCTCTAAGCCTCCTTATTTCGAGCCGAGCTGGGCCAGCCAGGCAACCTTCTAGG  
TAACGACCACATCTACAACGTTATCGTACAGCCCATGCA  
TTTGTAAATAATCTTCTTCATAGTAATACCCATCATAATCGGAGGCTTTGGCAACTGACTAGTTCCCTAATAATCGGTGC  
CCCCGATATGGCGTTCCCCCGCATAAAACAACATAAGCTTC  
TGACTCTTACCTCCCTCTCTCCTACTCCTGCTCGCATCTGCTATAGTGGAGGCCGAGCAGGAACAGGTTGAACAGTCTA  
CCCTCCCTTAGCAGGGAACACTCCCACCCTGGAGCCTCC  
GTAGACCTAACCATCTTCTCCTTACACCTAGCAGGTGTCTCCTCTATCTTAGGGGCCATCAATTTTCATCACAAACATTAT  
CAATATAAAACCCCTGCCATAACCCAATACCAAACGCC  
CTCTTCGTCTGATCCGTCTAATCACAGCAGTCTACTTCTCCTATCTCTCCAGTCTTAGCTGCTGGCATCACTATACT  
ACTAACAGACCGCAACCTCAACACCACCTTCTTCGACCCC  
GCCGGAGGAGGAGACCCATTCTATACCAACACCTATTCTGATTTTTTCGGTACCCTGAAGTTTATATTCTTATCCTACC  
AGGCTTCGGAATAATCTCCCATATTGTAACCTACTACTCC  
GGAAAAAAGAACCATTTGGATACATAGGTATGGTCTGAGCTATGATATCAATTGGCTTCTTAGGGTTTATCGTGTGAGC  
ACACCATATATTTACAGTAGGAATAGACGTAGACACACGA  
GCATATTTACCTCCGCTACCATAATCATCGCTATCCCCACCGCGTCAAAGTATTTAGCTGACTCGCCACACTCCACGG  
AAGCAATATGAAATGATCTGCTGCAGTGTCTGAGCCCTA  
GGATTCATTTTTCTTTTTACCGTAGGTGGCCTGACTGGCATTGTATTAGCAAACCTCATCACTAGACATCGTACTACACGA  
CACGTACTACGTTGTAGCTCACTTCCACTATGTCCTATCA  
ATAGGAGCTGATTTTCCATCATAGGAGGCTTCATTCAGTATTTCCCTATTCTCAGGCTACACCCTAGACCAAACCTA  
CGCCAAAATCCATTTTCGCTATCATATTCATCGGCGTAAAT  
CTAACTTTCTTCCACAACACTTTCTCGGCCTATCCGGAATGCCCCGACGTTACTCGGACTACCCCGATGCATACACCAC  
ATGAAATGTCCTATCATCTGTAGGCTCATTCAATTTCTCTA  
ACAGCAGTAATATTAATAATTTTTCATGATTTGAGAAGCCTTCGCTTCGAAGCGAAAAGTCTAATAGTAGAAGAACCCTC  
CATAAACCTGGAGTGACTATATGGATGCCCCCACCCTAC  
CACACATTCGAAGAACCCGTATACATAAAAATCTAGACAAAAAAGGAAGGAATCGAACCCCCCAAAGCTGGTTTTCAAGCCA  
ACCCCATGGCCTCCATGACTTTTTTCAAAAAGATATTAGAA

AAACCATTTTCATAACTTTGTCAAAGTTAAATTATAGGCTAAATCCTATATATCTTAATGGCACATGCAGCGCAAGTAGGT  
CTACAAGACGCTACTTCCCCTATCATAGAAGAGCTTATCA  
CCTTTTCATGATCACGCCCTCATAGTCATTTTTCTTATCTGCTTCTTAGTCCTGTATGCCCTTTTCTAACACTCACAACA  
AAACTAACTAATACTAACATCTCAGACGCTCAGGAAATAG  
AAACCGTCTGAACCTATCCTGCCCCCATCATCCTAGTCCTCATCGCCCTCCCATCCCTACGCATCCTTTACATAACAGAC  
GAGGTCAACGATCCCTCCCTTACCATCAAATCAATTGGCC  
ACCAATGGTACTGAACCTACGAGTACACCGACTACGGCGGACTAATCTTCAACTCCTACATACTTCCCCATTATTCTTA  
GAACCAGGCGACTGCGACTCCTTGACGTTGACAATCGAG  
TAGTACTCCCGATTGAAGCCCCATTTCGTATAATAATTACATCACAAGACGTCTTGCACTCATGAGCTGTCCCCACATTA  
GGCTTAAAAACAGATGCAATTCCTGGGACGTCTAAACAAA  
CCACTTTCACCGCTACACGACCGGGGTATACTACGGTCAATGCTCTGAAATCTGTGGAGCAAACCACAGTTTTTCATGCC  
ATCGTCTTAGAATTAATTTCCCCTAAAAATCTTTGAAATAG  
GACCCGTATTTACCCTATAGCACCCCTCTACCCCTCTAGAGCCCACTGTAAAGCTAAGCTTAGCATTAACTTTTAAAGT  
TAAAGATTAAGAGAACCAACACCTCTTTACAGTGAAATGC  
CCCACTAAATACTACCGTATGGCCACCATAATTACCCCTACTCCTTACACTATTCTCATCACCCAACTAAAAATA  
TTAAACACAACTACCCTTACCTCCCTCACCAAGCCCA  
TAAAAATAAAAAATTATAACAAACCCTGAGAACCAAAATGAACGAAAATCTGTTTCGCTTTCATTATTGCCCCACAATCC  
TAGGCCTACCCGCGCAGTACTGATCATTCTATTTCCCC  
TCTATTGATCCCCACCTCCAAATATCTCATCAACAACCGACTAATTACCACCAACAATGACTAATCAAATAACCTCAA  
AACAAATGATAGCCATACACAACACTAAAGGACGAACCTG  
ATCTCTTATACTAGTATCCTTAATCATTTTTTATTGCCACAATAACCTCCTCGGACTCCTGCCTCACTCATTTACACCAA  
CCACCAACTATCTATAAACCTAGCCATGGCCATCCCCTT  
ATGAGCGGGCGCAGTGATTATAGGCTTTTCGCTCTAAGATTAATAATGCCCCTAGCCCACTTCCCTACCACAAGGCACACCTA  
CACCCCTTATCCCCATACTAGTTATTATCGAAACCATCAG  
CCTACTCATTCAACCAATAGCCCTAGCCGTACGCCTAACCGCTAACATTACTGCAGGCCACCTACTCATGCATCTAATTG  
GAAGCGCCACCCTAGCAATATCAACCATTAACCTTCCCTC  
TACACTTATCATCTTCACAATTCTAATTCTACTGACTATCCTAGAAGTCGCTGTGCCTTAATCCAAGCCTACGTTTTCA  
CACTTCTAGTAAGCCTCTACCTGCACGACAACACATAATG  
ACCCACCAATCACATGCCTATCATATAGTAAAAACCCAGCCCATGACCCCTAACAGGGGCCCTCTCAGCCCTCCTAATGAC  
CTCCGGCCTAGCCATGTGATTTCACTTCCACTCCATAACG  
CTCCTCATACTAGGCCTGCTAACCAACACACTAACCATATACCAATGATGGCGCGATGTAACACGAGAAAGCACATACCA  
AGGCCACCACACACCACCTGTCCAAAAAGGCCTTTCGATAC  
GGGATAATCCTATTTATTACCTCAGAAGTTTTTTTTCTTCGAGGATTTTTCTGAGCCTTTTACCCTCCAGCCCTAGCCCC  
TACCCCAACTAGGAGGGCACTGGCCCCAACAGGCATC  
ACCCCGCTAAATCCCCTAGAAGTCCCACTCCTAAACACATCCGTATTACTCGCATCAGGAGTATCAATCACCTGAGCTCA  
CCATAGTCTAATAGAAAACAACCGAAACCAATAATTCAA  
GCACTGCTTATTACAATTTTACTGGGTCTCTATTTTACCCTCCTACAAGCCTCAGAGTACTTCGAGTCTCCCTTACCCT  
TTCCGACGGCATCTACGGCTCAACATTTTTTTGTAGCCACA  
GGCTTCCATGGACTTCACGTCAATTATTGGCTCAACTTTTCTCACTATCTGCTTTCATCCGCCAACTAATATTTCACTTTAC  
ATCCAAACATCACTTTGGCTTTCGAAGCCGCGCCTGATAC  
TGGCATTGTTGTAGATGTGGTTTACTATTTCTGTATGTCTCCATCTATTGATGAGGGTCTTACTCTTTTAGTATAAATAG  
TACCGTTAACTTCCAATTAAGTATTTTGGACAACATTCAA  
AAAAGAGTAATAAACTTCGCCTTAATTTTAATAATCAACACCCTCCTAGCCTTACTACTAATAATTATTACATTTTACT  
ACCACAACCTCAACGGCTACATAGAAAAATCCACCCCTTAC  
GAGTGGCGCTTCGACCCTATATCCCCGCCCCGCTCCCTTTCTCCATAAAATTCTTCTTAGTAGCTATTACCTTCTTATT  
ATTTGATCTAGAAATTGCCCTCCTTTTACCCTACCATGA  
GCCCTACAAACAATAACCTGCCACTAATAGTTATGTATCCTCCTTATTAATCATCATCCTAGCCCTAAGTCTGGCCTA  
TGAGTACTACAAAAAGGATTAGACTGAGCCGAATTGGTA  
TATAGTTTAAACAAAACGAATGATTTTCGACTCATTAAATTATGATAATCATATTTACCAATGCCCTCATTACATAAA  
TATTATACTGGCATTACCATCTCACTTCTAGGAATACTA  
GTATATCGCTCACACCTCATATCCTCCCTACTATGCCTAGAAGGAATAATACTATCGCTATTATTATAGCTACTCTCAT  
AACCCTCAACACCCACTCCCTCTTAGCCAATATTGTGCCT  
ATTGCCATACTAGTTTTTGGCGCCTGCGAAGCAGCGGTAGGCCTAGCCCTACTAGTCTCAATCTCCAACACATATGGCCT  
AGACTACGTACATAACCTAAACCTACTCCAATGCTAAAAC  
TAATCGTCCCAACAATTATATTACTACCCTGACATGACTCTCCAAAAAACACATAATTTGAATCAACACAACCACCCAC  
AGCCTAATTATTAGCATCATCCCCCTGCTATTTTTTAAACC

AAATCAACAACAACCTATTTAGCTGCTCCCTAACCTTTTTCTCCGACCCTCTAACAAACCCCCCTCCTAATACTAACTACC  
TGACTCCTACCCCTCACAATCATGGCAAGCCAACGCCACT  
TATCCAGTGAACCACTATCACGAAAAAACTCTACCTCTCTATACTAATCTCCCTACAAATCTCCTTAATTATAACATTC  
ACAGCCACAGAATAATCATATTTTATATCTTCTTCGAAA  
CCACACTTATCCCCACCTTGGCTATCATCACCCGATGAGGCAACCAGCCAGAACGCCTGAACGCAGGCACATACTTCCTA  
TTCTACACCCTAGTAGGCTCCCTTCCCCTACTCATCGCAC  
TAATTTACACTCACAACACCCTAGGCTCACTAAACATTCTACTACTTACCCTCACTGCCAAGAACTATCAAACCTCTGA  
GCCAACAACCTTAATATGACTAGCTTACACAATAGCTTTTA  
TAGTAAAGATACCTCTTTACGGACTCCACTTATGACTCCCTAAAGCCCATGTGGAAGCCCCATCGCTGGGTCAATAGTA  
CTTGCCGCAGTACTCTTAAACTAGGCGGCTATGGTATAA  
TAGCCCTCACACTATTCTCAACCCCCTGACAAAACATAGCCTACCCCTTCTTGTACTATCCCTATGAGGCATAATT  
ATAACAAGCTCCATCTGCCTACGACAAAACAGACCTAAAAT  
CGCTCATTGCATACTCTTCAATCAGCCACATAGCCCTCGTAGTGACAGCCATTCTCATCCAAACCCCCTGAAGCTTCACC  
GGCGCAGTCACTTCTATAATCGCCCACGGACTTACATCCT  
CATTACTATTCTGCCTAGCAAACCTCAAACCTACGAACGCCTCACAGTCGCATCATAATCCTCTCTCAAGGACTTCAAACCT  
CTACTCCCACTAATAGCTTTTTGATGACTTCTAGCAAGCC  
TCGCTAACCTCGCCTTACCCCCCACTATTAACCTACTGGGAGAACTCTCTGTGCTAGTAACCACATTCTCCTGATCAAAT  
ATCACTCTCCTACTTACAGGACTCAACATACTAGTCACAG  
CCCTATACTCCCTCTACATATTTACCACAACACAATGAGGCTCACTCACCCACCACATTAACAACATAAAACCCCTCATTC  
ACACGAGAAAACACCCTCATATTCATACACCTATCCCCCA  
TTCTCCTCCTATCCCTCAACCCCGACATCATTACCGGGTTTTCTCTTGTAAATATAGTTTTAACAAAACATCAGATTGT  
GAATCTGACAACAGAGGCTTACGACCCCTTATTTACCGAG  
AAAGCTCACAAGAAGTCTAATCATGCCCCATGTCTAACAAACATGGCTTTCTCAACTTTTAAAGGATAACAGCTATCC  
ATTGGTCTTAGGCCCCAAAAATTTTGGTGCAACTCCAAAT  
AAAAGTAATAACCATGCACACTACTATAACCACCCTAACCCCTGACTTCCCTAATTCCCCCATCCTTACCACCCTCGTTA  
ACCCTAACAAAAAAACTCATACCCCACTTATGTAAAATC  
CATTGTGCATCCACCTTTATTATCAGTCTCTTCCCCACAACAATATTATCATGTGCCTAGACCAAGAAGTTATTATCTCGA  
ACTGACACTGAGCCACAACCCAAAACAACCCAGCTCTCCCT  
AAGCTTCAAAGTAGACTACTTCTCATAATATTCACTCCCTGTAGCATTGTTGTTACATGGTCCATCATAGAATTCTCAC  
TGTGATATATAAACTCAGACCCAAAACATTAATCAGTTCTT  
CAAATATCTACTCATTTTTCTAATTACATACTAATCTTAGTTACCGCTAACAAACCTATTCCAAGTTCATCGGCTGAG  
AGGGCGTAGGAATTATATCCTTCTTGCTCATCAGTTGATG  
ATACGCCCAGCAGATGCCAACACAGCAGCCATTCAAGCAATCCTATACAACCGTATCGGCGATATCGGTTTTATCCTCG  
CCTTAGCATGATTTATCCTACTCCAACCTCATGAGACCC  
ACAACAATAGCCCTTCTAAACGCTAATCCAAGCCTCACCCCACTACTAGGCCTCCTCCTAGCAGCAGCAGGCAAATCAG  
CCCAATTAGGCCTCCACCCCTGACTCCCCTCAGCCATAGA  
AGGCCCCACCCAGTCTCAGCCCTACTCCACTCAAGCACTATAGTTGTAGCAGGAGTCTTCTTACTCATCCGCTTCCACC  
CCCTAGCAGAAAATAGCCCACTAATCCAAACTCTAACACT  
ATGCTTAGGCGCTATCACCCTCTGTTTCGAGCAGTCTGCGCCCTTACACAAAATGACATCAAAAAAATCGTAGCCTTCT  
CCACTTCAAGTCAACTAGGACTCATAGTAGTTACAATCGG  
CATCAACCAACCACACCTAGCATTCTGCACATCTGTACCCACGCCTTCTTCAAAGCCATACTATTTATGTGCTCCGGGT  
CCATCATCCACAACCTTAAACAATGAACAAGATATTCGAAA  
AATAGGAGGACTACTCAAACCATACCTCTCACTTCAACCTCCCTCACCATTGGCAGCCTAGCATTAGCAGGAATACCTT  
TCCTCACAGTTTTCTATTCCAAAGACCACATCATCGAAAC  
CGCAAACATATCATACAAAACGCCTGAGCCCTATCTATTACTCTCATCGCTACCTCCCTAACAAAGCGCCTATAGCACTC  
GAATAATTCTTCTCACCCCTAACAGGTCAACCTCGCTTCCC  
TACCCTTACTAACATTAACGAAAATAACCCCACTTAAACCCCATTAACGCCTGGCAGCCGGAAGCCTATTTCGAG  
GATTTCTCATTACTAACAACATTTCCCCCGCATCCCCCTT  
CCAAACAACAATCCCCCTCTACCTAAAACCTCACAGCCCTCGCTGTCACTCTCCTAGGACTTCTAACAGCCCTAGACCTCA  
ACTACCTAACCAACAACCTTAAAATAAAATCCCCACTATG  
CACATTTTATTTCTCCAACATACTCGGATTCTACCCTACCATCACACACCCGACAATCCCCCTATCTAGGCCTTCTTACGA  
GCCAAAACCTGCCCTACTCCTCCTAGACCTAACCTGACT  
AGAAAAGCTACTACCTAAAACAATTTACAGCACCAAATCTCCACCTCCATCATCACCTCAACCCAAAAGGCATAATTA  
AACTTTACTTCTCTCTTTCTTCTTCCCCTCATCCTAAC  
CCTACTCCTAATCACATAACCTATTCCCCGAGCAATCTCAATTACAATATACACACCAACAACAATGTTCAACCAGTA  
ACTACTACTAATCAACGCCATAATCATACAAAGCCCCCG

CACCAATAGGATCCTCCCGAATCAACCCTGACCCCTCTCCTTCATAAATTATTTCAGCTTCTTACACTATTAAGTTTACC  
ACAACCACCACCCCATCATACTCTTTACCCACAGCACCA  
ACCCACCTCCATCGCTAACCCCACTAAAACACTCACCAAGACCTCAACCCCTGACCCCATGCCTCAGGATACTCCTCA  
ATAGCCATCGCTGTAGTATATCCAAAGACAACCATCATT  
CCCCTAAATAAATTAATAAACTATTAACCCATATAACCTCCCCAAAATTTCAGAATAATAACACACCCGACCACACCG  
CTAACAAATCAATACTAAACCCCATAAATAGGAGAAGGCT  
TAGAAGAAAACCCCAAAACCCCATTAATAACCCACACTCAACAGAAAACAAAGCATAACATCATTATTCTCGCACGGACT  
ACAACCACGACCAATGATATGAAAAACCATCGTTGTATTT  
CAACTACAAGAACACCAATGACCCCAATACGCAAAATTAACCCCTAATAAAATTAATTAACCACTCATTTCATCGACCTC  
CCCACCCCATCCAACATCTCCGCATGATGAACTTCGGCT  
CACTCCTTGCGCCTGCCTGATCCTCAAATCACCACAGGACTATTCTAGCCATGCACTACTCACCAGACGCCTCAACC  
GCCTTTTCATCAATCGCCACATCACTCGAGACGTAATTT  
ATGGCTGAATCATCCGCTACCTTCACGCCAATGGCGCCTCAATATTCTTTATCTGCCTCTTCTACACATCGGGCGAGGC  
CTATATTACGGATCATTCTCTACTCAGAAACCTGAAACA  
TCGGCATTATCCTCCTGCTTGCAACTATAGCAACAGCCTTCATAGGCTATGTCTCCCGTGAGGCCAAATATCATTCTGA  
GGGGCCACAGTAATTACAACTTACTATCCGCCATCCCAT  
ACATTGGGACAGACCTAGTTCAATGAATCTGAGGAGGCTACTCAGTAGACAGTCCCACCCTCACACGATTCTTTACCTTT  
CACTTCATCTTGCCCTTCATTATTGCAGCCCTAGCAGCAC  
TCCACCTCCTATTCTTGACGAAACGGGATCAAACAACCCCTAGGAATCACCTCCCATTCCGATAAAATCACCTTCCAC  
CCTTACTACACAATCAAAGACGCCCTCGGCTTACTTCTCT  
TCCTTCTCTCCTTAATGACATTAACACTATTCTCACCAGACCTCCTAGGCGACCCAGACAATTATACCCTAGCCAACCC  
TTAAACACCCCTCCCCACATCAAGCCCGAATGATATTTCC  
TATTGCCTACACAATTCTCCGATCCGTCCCTAACAACTAGGAGGCGTCTTGCCTTATTACTATCCATCCTCATCCTA  
GCAATAATCCCCATCCTCCATATATCCAAACAACAAAGCA  
TAATATTTGCGCCACTAAGCCAATCACTTTATTGACTCCTAGCCGAGACCTCCTCATTCTAACCTGAATCGGAGGACAA  
CCAGTAAGCTACCCTTTTACCATCATTGGACAAGTAGCAT  
CCGTACTATACTTCACAACAATCCTAATCCTAATACCAACTATCTCCCTAATTGAAAACAAAATACTCAAATGGGCCTGT  
CCTTGATAGTATAAACTAATAACACAGTCTTGTAACCCGGA  
GATGAAAACCTTTTTCCAAGGACAAATCAGAGAAAAGTCTTTAACTCCACCATTAGCACCCAAAGCTAAGATTCTAATT  
TAAACTATT

#AFRICA Yoruba

CCACAGTTTATGTAGCTTACCTCCTCAAAGCAATACACTGAAAATGTTTACGAGGGCTCACATCACCCCATAAACAAATA  
GGTTTGGTCTAGCCTTTCTATTAGCTCTTAGTAAGATTA  
CACATGCAAGCATCCCCGTTCCAGTGAGTTACCCTCTAAATCACCACGATCAAAGGGACAAGCATCAAGCACGCAGCA  
ATGCAGCTCAAAACGCTTAGCCTAGCCACACCCCCACGGG  
AAACAGCAGTGATTAACCTTTAGCAATAAACGAAAGTTTAACTAAGCTATACTAACCCAGGGTTGGTCAATTTCTGTGCC  
AGCCACCGCGGTACACGATTAACCCAAGCCAATAGAAGC  
CGGCGTAAAGAGTGTTTTAGATCACCCCTCCCCAATAAAGCTAAAACCTCACCTGAGTTGTAAAAACTCCAGTTGACAC  
AAAATAGACTACGAAAGTGGCTTTAACATATCTGAACACA  
CAATAGCTAAGACCCAACTGGGATTAGATACCCCACTATGCTTAGCCCTAAACCTCAACAGTTAAATCAACAAAACCTGC  
TCGCCAGAACACTACGAGCCACAGCTTAAAACCTCAAAGGA  
CCTGGCGGTGCTTCATATCCCTCTAGAGGAGCCTGTTCTGTAATCGATAAACCCCGATCAACCTCACCACCTCTTGCTCA  
GCCTATATACCGCCATCTTCAGCAAACCCTGATGAAGGCT  
ACAAAGTAAGCGCAAGTACCCACGTAAGACGTTAGGTCAAGGTGTAGCCCATGAGGTGGCAAGAAATGGGCTACATTTT  
CTACCCAGAAAACCTACGATAGCCCTTATGAACTTAAGG  
GTCGAAGGTGGATTTAGCAGTAACTGAGAGTAGAGTGCTTAGTTGAACAGGGCCCTGAAGCGGTACACACCGCCCGTC  
ACCCTCCTCAAATATACTTCAAAGGACATTTAACTAAAAC  
CCCTACGCAATTTATATAGAGGAGACAAGTCGTAACATGGTAAGTGTACTGGAAAGTGCCTTGGACGAACCAGAGTGTAG  
CTTAACACAAAGCACCCAACCTTACACTTAGGAGATTTCAA  
CTTAACCTTGACCGCTCTGAGCTAAACCTAGCCCCAAACCCACTCCACCTTACTACCAGACAACCTTAGCCAAACCATTTA  
CCCCAATAAAGTATAGGCGATAGAAATTGAAACCTGGCGC  
AATAGATATAGTACCGCAAGGGAAAGATGAAAAATTATAACCAAGCATAATATAGCAAGGACTAACCCCTATACCTTCTG  
CATAATGAATTAAGTAAATAAATTTGCAAGGAGAGCCA  
AAGCTAAGACCCCGAAACCAGACGAGCTACCTAAGAACAGCTAAAAGAGCACACCCGTCTATGTAGCAAAATAGTGGGA  
AGATTTATAGGTAGAGGCGACAAACCTACCGAGCCTGGTG

ATAGCTGGTTGTCCAAGATAGAATCTTAGTTCAACTTTAAATTTGCCACAGAACCCTCTAAATCCCCTTGTAATTTAA  
CTGTTAGTCCAAAGAGGAACAGCTCTTTGGACACTAGGAA  
AAAACCTTGTAGAGAGAGTAAAAAA-  
TTTAAACCCCATAGTAGGCCTAAAAGCAGCCACCAATTAAGAAAGCGTTCAAGCTCAACACCCACTACCTAAAAAA-  
TCCCAAACATATAACTG  
AACTCCTCACACCCAATTGGACCAATCTATCACCCCTATAGAAGAATAATGTTAGTATAAGTAACATGAAAACATTCTCC  
TCCGCATAAGCCTGCGTCAGATTAACCACTGAACTGACA  
ATTAACAGCCCAATATCTACAATCAACCAACAAGTCATTATTACCCTCACTGTCAACCCAACACAGGCATGCTCATAAGG  
AAAGGTTAAAAAAGTAAAAGGAACTCGGCAAATCTTACC  
CCGCCTGTTTACCAAAAACATCACCTCTAGCATCACCGATTAGAGGCACCGCCTGCCAGTGACACATGTTTAAACGGC  
CGCGGTACCCTAACCGTGCAAAGGTAGCATAATCACTTGT  
TCCTTAAATAGGGACCTGTATGAATGGCTCCACGAGGGTTAGCTGTCTCTTACTTTTAAACAGTGAAATTGACCTGCC  
GTGAAGAGGCGGGCATGACACAGCAAGACGAGAAGACCCT  
ATGGAGCTTTAATTTATTAATGCAAACAGTACCTAACAAACCCACAGGTCCTAAACTACCAAACCTGCATTAATAATTTT  
GGTTGGGGCGACCTCGGAGCAGAACCAACCTCCGAGCAG  
TACATGCTAAGACTTCACCAGTCAAAGCGAACTACTATACTCAATTGATCCAATAACTTGACCAACGGAACAAGTTACCC  
TAGGGATAACAGCGCAATCCTATTCTAGAGTCCATATCAA  
CAATAGGGTTTTACGACCTCGATGTTGGATCAGGACATCCCGATGGTGCAGCCGCTATTAAAGGTTTCGTTTGTTCACCGAT  
TAAAGTCTACGTGATCTGAGTTCAGACCGGAGTAATCCA  
GGTCGGTTTTCTATCTACTTCAAATTCCTCCCTGTACGAAAGGACAAGAGAAATAAGGCCTACTTCACAAAGCGCCTTCCC  
CCGTAAATGATATCATCTCAACTTAGTATTATACCCACAC  
CCACCCAAGAACAGGGTTTTGTTAAGATGGCAGAGCCCGTAATCGCATAAACTTAAACTTTACAGTCAGAGGTTCAAT  
TCCTCTTCTTAAACAACATACCCATGGCCAACCTCCTACTC  
CTCATTGTACCCATTCTAATCGCAATGGCATTTCCTAATGCTTACCGAACGAAAAATTCTAGGCTATATACAACTACGCAA  
AGGCCCAACGTTGTAGGCCCTACGGGCTACTACAACCC  
TTCGCTGACGCCATAAACTCTTACCAAAGAGCCCCTAAAACCCGCCACATCTACCATCACCCCTCTACATCACCGCCCC  
GACCTTAGCTCTCACCATCGCTCTTCTACTATGAACCCCC  
CTCCCCATACCAACCCCTGGTCAACCTCAACCTAGGCCCTCTATTTATTCTAGCCACCTCTAGCCTAGCCGTTTACTC  
AATCCTCTGATCAGGGTGAGCATCAAACCTCAAACCTACGCC  
CTGATCGGCGCACTGCGAGCAGTACCCCAAACAATCTCATATGAAGTACCCTAGCCATCATTCTACTATCAACATTACT  
AATAAGTGGCTCCTTTAACCTCTCCACCCTTATCACAACA  
CAAGAACACCTCTGATTACTCCTGCCATCATGACCCTTGGCCATAATATGATTTATCTCCACACTAGCAGAGACCAACCG  
AACCCCTTCGACCTTGCCGAAGGGGAGTCCGAACCTAGTC  
TCAGGCTTCAACATCGAATACGCCGAGGCCCTTCGCCCTATTCTTCATAGCCGAATACACAAACATTATTATAATAAA  
CACCCCTCACCACTACAATCTTCTAGGAACAACATATAAC  
GCACTCTCCCCTGAACTCTACACAACATATTTTTGTACCAAGACCCTACTTCTAACCTCCCTGTTCTTATGAATTGAAAC  
AGCATAACCCCGATTCCGCTACGACCAACTCATAACCTC  
CTATGAAAAAATTCCTACCCTCACCCCTAGCGTTACTTATATGATATGTCTCCATACCCATTACAATCTCCAGCATTCC  
CCCTCAAACCTAAGAAATATGTCTGATAAAAGAGTTACTT  
TGATAGAGTAAATAATAGGAGCTTAAACCCCTTATTTCTAGGACTATGAGAATCGAACCCATCCCTGAGAATCCAAAAT  
TCTCCGTGCCACCTATCACACCCCATCCTAAAGTAAGGTC  
AGCTAAATAAGCTATCGGGCCCATACCCCGAAAATGTTGGTTATACCCTTCCCGTACTAATTAATCCCCTGGCCCAACCC  
GTCATCTACTCTACCATCTTTGCAGGCACACTCATCACAG  
CGCTAAGCTCGCACTGATTTTTTACCTGAGTAGGCCTAGAAATAAACATGCTAGCTTTTTATTCCAGTTCTAACCAAAAA  
ATAAACCCCTCGTTCCACAGAAGCTGCCATCAAGTATTTCC  
TCACGCAAGCAACCGCATCCATAATCCTTCTAATAGCTATCCTCTTCAACAATATACTCTCCGGACAATGAACCATAACC  
AATACTACCAATCAATACTCATCATTATAATAATCATAATGG  
CTATAGCAATAAACTAGGAATAGCCCCCTTCACTTCTGAGTCCCAGAGGTTACCCAAGGCACCCCTCTGACATCCGGC  
CTGCTTCTTCTCACATGACAAAACTAGCCCCCATCTCAA  
TCATATACCAAATCTCTCCCTCACTAAACGTAAGCCTTCTCCTCACTCTCTCAATCTTATCCATCATAGCAGGCAGTTGA  
GGTGGATTAAACCAAACCCAGCTACGCAAAATCTTAGCAT  
ACTCCTCAATTACCCACATAGGATGAATAATAGCAGTTCTACCGTACAACCCTAACATAACCATTCTTAATTTAACTATT  
TATATTATCCTAACTACTACCGCATTCTACTACTCAACT  
TAAACTCCAGCACCACAACCCCTACTACTATCTCGCACCTGAAACAAGCTAACATGACTAACACCCTTAATTCATCCACC  
CTCCTCTCCCTAGGAGGCCTGCCCCGCTAACGGGCTTTT  
TGCCCAAATGGGCCATTATCGAAGAATTCACAAAAACAATAGCCTCATCATCCCCACCATCATAGCCACCATCACCCCTC  
CTTAACCTCTACTTCTACCTACGCCTAATCTACTCCACCT

CAATCACACTACTCCCCATATCTAACAAACGTAAAAATAAAATGACAGTTTGAACATACAAAACCCACCCCATTCCTCCCC  
ACACTCATCGCCCTTACCACACTACTCCTACCTATCTCCC  
CTTTTATACTAATAATCTTATAGAAATTTAGGTTAAATACAGACCAAGAGCCTTCAAAGCCCTCAGTAAGTTGCAATACT  
TAATTTCTGTAACAGCTAAGGACTGCAAAAACCCCACTCTG  
CATCAACTGAACGCAAATCAGCCACTTTAATTAAGCTAAGCCCTTACTAGACCAATGGGACTTAAACCCACAAAACACTTA  
GTTAACAGCTAAGCACCTAATCAACTGGCTTCAATCTAC  
TTCTCCC GCCCGGGAAAAAGGCGGGAGAAGCCCCGGCAGGTTTGAAGCTGCTTCTTCGAATTTGCAATTCAATATGA  
AAATCACCTCGGAGCTGGTAAAAAGAGGCCTAACCCCTGT  
CTTTAGATTTACAGTCCAATGCTTCACTCAGCCATTTTACCTCACCCCC-  
ACTGATGTTCCGCCGACCGTTGACTATTCTCTACAAACCAAAAGACATTGGAACACTATACTATTATTC  
GGCGCATGAGCTGGAGTCTTAGGCACAGCTCTAAGCCCTCCTTATTTCGAGCCGAGCTGGGCCAGCCAGGCAACCTTCTAGG  
TAACGACCACATCTACAACGTTATCGTACAGCCCATGCA  
TTTGTAATAATCTTCTTCATAGTAATACCCATCATAATCGGAGGCTTTGGCAACTGACTAGTTCCCCTAATAATCGGTGC  
CCCCGATATGGCGTTTTCCCGCATAAACAACATAAGCTTC  
TGACTCTTACCTCCCTCTCTCCTACTCCTGCTCGCATCTGCTATAGTGGAGGCCGGAGCAGGAACAGGTTGAACAGTCTA  
CCCTCCCTTAGCAGGGAACACTCCACCCTGGAGCCTCC  
GTAGACCTAACCATCTTCTCCTTACACCTAGCAGGTGTCTCCTCTATCTTAGGGGCCATCAATTTTATCACAACAATTAT  
CAATATAAAAACCCCTGCCATAACCCAATACCAAACGCC  
CTCTTCGTCTGATCCGTCTAATCACAGCAGTCTACTTCTCCTATCTCTCCAGTCTTAGCTGCTGGCATCACTATACT  
ACTAACAGACCGCAACCTCAACACCACCTTCTTCGACCCC  
GCCGGAGGAGGAGACCCATTCTATACCAACACCTATTCTGATTTTTTCGGTACCCTGAAGTTTATATTCTTATCCTACC  
AGGCTTCGGAATAATCTCCCATATTGTAACCTACTACTCC  
GGAAAAAAGAACCATTTGGATACATAGGTATGGTCTGAGCTATGATATCAATTGGCTTCCCTAGGGTTTATCGTGTGAGC  
ACACCATATATTTACAGTAGGAATAGACGTAGACACACGA  
GCATATTTACCTCCGCTACCATAATCATCGCTATCCCCACCGCGTCAAAGTATTTAGCTGACTCGCCCACTCCACGG  
AAGCAATATGAAATGATCTGCTGCAGTGTCTGAGCCCTA  
GGATTCATCTTTCTTTTACCAGTAGGTGGCCTGACTGGCATTGTATTAGCAAACCTCATCACTAGACATCGTACTACACGA  
CACGTACTACGTTGTAGCTCACTTCCACTATGTCTATCA  
ATAGGAGCTGATTTGCCATCATAGGAGGCTTCACTGATTTCCTTATTTCCCTATTCTCAGGCTACACCCTAGACCAAACCTA  
CGCCAAAATCCATTTCACTATCATATTTCATCGGCGTAAAT  
CTAACTTTCTTCCCAACACTTTCTCGGCCTATCCGGAATGCCCCGACGTTACTCGGACTACCCCGATGCATACACCAC  
ATGAAACATCCTATCATCTGTAGGCTCATTCAATTTCTCTA  
ACAGCAGTAATATTAATAATTTTTCATGATTTGAGAAGCCTTCGCTTCGAAGCGAAAAGTCTAATAGTAGAAGAACCCTC  
CATAAACCTGGAGTGACTATATGGATGCCCCCACCCTAC  
CACACATTCGAAGAGCCCGTATACATAAAAATCTAGACAAAAAGGAAGGAATCGAACCCCCCAAAGCTGGTTTTCAAGCCA  
ACCCCATGGCCTCCATGACTTTTTTCAAAAAGGTATTAGAA  
AAACCATTTATAACTTTGTCAAAGTTAAATTATAGGCTAAATCCTATATATCTTAATGGCACATGCAGCGCAAGTAGGT  
CTACAAGACGCTACTTCCCCTATCATAGAAGAGCTTATTA  
CCTTTTCATGATCACGCCCTCATAATCATTTTCTTATCTGCTTCTTAGTCTGTATGCCCTTTTCTTAACACTCACAACA  
AAACTAACTAATACTAACATCTCAGACGCTCAGGAAATAG  
AAACCGTCTGAACTATCCTGCCCGCCATCATCCTAGTCTCATCGCCCTCCCATCCCTACGCATCCTTTACATAACAGAC  
GAGGTCAACGATCCCTCCCTTACCATCAAATCAATTGGCC  
ACCAATGGTACTGAACCTACGAGTACACCGACTACGGCGGACTAATCTTCAACTCCTACATACTTCCCCATTATTCTTA  
GAACCAGGCGACCTGCGACTCCTTGACGTTGACAATCGAG  
TAGTACTCCCGATTGAAGCCCCCATTCTGTATAATAATTACATCACAAGACGTCTTGCACCTCATGAGCTGTCCCCACATTA  
GGCTTAAAAACAGATGCAATTTCCCGGACGTCTAAACAAA  
CCACTTTTACCCTACACGACCGGGGTATACTACGGTCAATGCTCTGAAATCTGTGGAGCAAACCACAGTTTTTCATGCC  
ATCGTCTAGAATTAATTTCCCTTAAAAATCTTTGAAATAG  
GGCCCGTATTTACCCTATAGCACCCCTCTACCCCTCTAGAGCCCACTGTAAAGCTAACTTAGCATTAACTTTTAAAGT  
TAAAGATTAAGAGAACCAACACCTCTTTACAGTGAAATGC  
CCCAACTAAATACTACCGTATGGCCACCATAATTACCCCATACTCCTTACACTATTCTCATACCCCAACTAAAAATA  
TTAAACACAAACTACCACCTACCTCCCTCACCAAAGCCCA  
TAAAAATAAAAAATTATAACAAACCCTGAGAACCAAAATGAACGAAAATCTGTTTCGCTTTCATTATTGCCCCCAACATCC  
TAGGCCTACCCGCCGAGTACTGATCATTCTATTTCCCC  
TCTATTGACCCCACTCCAAATATCTCATCAACAACCGACTAATCACCACCAACAATGACTAATCAAACCTAACCTCAA  
AACAAATGATAGCCATACACAACACTAAAGGACGAACCTG

ATCTCTTATACTAGTATCCTTAATCATTFFFFTATTGCCACAACCTAACCTCCTCGGACTCCTGCCTCACTCATTACACCAA  
CCACCCAACCTATCTATAAACCTAGCCATGGCCATCCCCTT  
ATGAGCGGGCGCAGTGATTATAGGCTTTTCGCTCTAAGATTAAAAATGCCCTAGCCCACTTCTTACCACAAGGCACACCTA  
CACCCCTTATCCCCATACTAGTTATTATCGAAACCATCAG  
CCTACTCATTCAACCAATAGCCCTGGCCGTACGCCTAACCGCTAACATTACTGCAGGCCACCTACTCATGCACCTAATTG  
GAAGCGCCACCCTAGCAATATCAACCATTAACCTTCCCTC  
TACACTTATCATCTTACAATTCTAATTCTACTGACTATCCTAGAAATCGCTGTGCGCTTAATCCAAGCCTACGTTTTCA  
CACTTCTAGTAAGCCTCTACCTGCACGACAACACATAATG  
ACCCACCAATCACATGCCTATCATATAGTAAAACCCAGCCCATGACCCCTAACAGGGGCCCTCTCAGCCCTCCTAATGAC  
CTCCGGCCTAGCCATGTGATTTCACTTCCACTCCATAACG  
CTCCTCATACTAGGCCTACTAACCAACACACTAACCATATACCAATGATGGCGCGATGTAACACGAGAAAGCACATACCA  
AGGCCAACACACACCACCTGTCCAAAAAGGCCTTCGATAC  
GGGATAATCCTATTTTATTACCTCAGAAGTTTTTTTTCTTCGAGGATTTTTCTGAGCCTTTTACCCTCCAGCCTAGCCCC  
TACCCCCCAACTAGGAGGGCACTGGCCCCAACAGGCATC  
ACCCCGCTAAATCCCCTAGAAGTCCCCTCCTAAACACATCCGTATTACTCGCATCAGGAGTATCAATCACCTGAGCTCA  
CCATAGTCTAATAGAAAACAACCGAAACCAAATAATTCAA  
GCACTGCTTATTACAATTTTACTGGGTCTCTATTTTACCCTCCTACAAGCCTCAGAGTACTTTCGAGTCTCCCTTACCAT  
TTCCGACGGCATCTACGGCTCAACATTTTTTTGTAGCCACA  
GGCTTCCACGGACTTTCAGTCAATTATTGGCTCAACTTTTCTCCTACTATCTGCTTCATCCGCCAACTAATATTTCACTTTAC  
ATCCAAACATCACTTTGGCTTCGAAGCCGCCGCTGATAC  
TGGCATTGTTGTAGATGTGGTTTACTATTTCTGTATGTCTCCATCTATTGATGAGGGTCTTACTCTTTTTAGTATAAATAG  
TACCGTTAACTTCCAATTAAGTATTTTGGACAACATTCAA  
AAAAGAGTAATAAACTTCGCCTTAATTTTTAATAATCAACACCCTCCTAGCCTTACTACTAATAATTATTACATTTTACT  
ACCACAACCTCAACGGCTACATAGAAAAATCCACCCCTTAC  
GAGTGCAGGCTTCGACCCTATATCCCCCGCCCGCTCCCTTTCTCCATAAAATTCTTCTTAGTAGCTATTACCTTCTTATT  
ATTTGATCTAGAAATTGCCCTCCTTTTTACCCCTACCATGA  
GCCCTACAAACAACCTAACCTGCCACTAATAGTTATGTCATCCCTCTTATTAATCATCATCCTAGCCCTAAGTCTGGCCTA  
TGAGTGACTACAAAAAGGATTAGACTGAGCCGAATTGGTA  
TATAGTTTTAAACAAAACGAATGATTTTCGACTCATTAAATTATGATAATCATATTTACCAAATGCCCTCATTACATAAA  
TATTATACTAGCATTACCATCTCACTTCTAGGAATACTA  
GTATATCGCTCACACCTCATATCCTCCCTACTATGCCTAGAAGGAATAATACTATCGCTGTTTATTATAGCTACTCTCAT  
AACCCCTCAACACCCACTCCCTCTTAGCCAACATTGTGCCT  
ATTGCCATACTAGTCTTTGCGCCTGCGAAGCAGCGGTGGGCCTAGCCCTACTAGTCTCAATCTCCAACACATATGGCCT  
AGACTACGTACATAACCTAAACCTACTCCAATGCTAAAAC  
TAATCGTCCCAACAATTATATTACTACCCTGACATGACTTTCCAAAAAACACATAATTTGAATCAACACAACCACCCAC  
AGCCTAATTATTAGCATCATCCCCCTACTATTTTTTAAAC  
AAATCAACAACAACCTATTTAGCTGCTCCCCAACCTTTTTCTCCGACCCCTAACAAACCCCTCCTAATACTAACTACC  
TGACTCCTACCCCTCACAAATCATGGCAAGCCAACGCCACT  
TATCCAGTGAACCACTATCACGAAAAAACTCTACCTCTCTATACTAATCTCCCTACAAATCTCCTTAATTATAACATTC  
ACAGCCACAGAATAATCATATTTTATATCTTCTTCGAAA  
CCACACTTATCCCCACCTTGGCTATCATACCCGATGAGGCAACCAGCCAGAACGCCTGAACGCAGGCACATACTTCCCTA  
TTCTACACCCTAGTAGGCTCCCTTCCCCTACTCATCGCAC  
TAATTTACTACTACAACACCCTAGGCTCACTAAACATTCTACTACTACTCTACTGCCCCAAGAACTATCAAACCTCCTGA  
GCCAACAACCTAATATGACTAGCTTACACAATAGCTTTTTA  
TAGTAAAGATACCTCTTTACGGACTCCACTTATGACTCCCTAAAGCCCATGTGGAAGCCCCATCGCTGGGTCAATAGTA  
CTTGCCGCAGTACTCTTAAAACCTAGGCGGCTATGGTATAA  
TACGCCTCACACTCATTCTCAACCCCTGACAAAAACATAGCCTACCCCTTCTTGTACTATCCCTATGAGGCATAATT  
ATAACAAGCTCCATCTGCCTACGACAAAACAGACCTAAAAT  
CGCTCATTGCATACTCTTCAATCAGCCACATAGCCCTCGTAGTAACAGCCATTCTCATCCAAACCCCTGAAGCTTACC  
GGCGCAGTCACTTCTATAATCGCCCACGGACTTACATCCT  
CATTACTATTCTGCCTAGCAAACCTCAAACCTACGAACGCCTCACAGTCGCATCATAATCCTCTCTCAAGGACTTCAAACCT  
CTACTCCACTAATAGCTTTTTTGTAGACTTCTAGCAAGCC  
TCGCTAACCTCGCCTTACCCCCACTATTAACCTACTAGGAGAACTCTCTGTGCTAGTAACCACGTTCTCCTGATCAAAT  
ATCACTCTCCTACTTACAGGACTCAACATACTAGTCACAG  
CCCTATACTCCCTCTACATATTTACCACAACACAATGGGGCTCACTCACCCACCACATTAACAACATAAAACCCCTCATTC  
ACACGAGAAAACACCCTCATGTTTATACACCTATCCCCCA

TTCTCCTCCTATCCCTCAACCCCGACATCATTACCGGGTTTTCTCTTGTAATATAGTTTAAACAAAACATCAGATTGT  
GAATCTGACAACAGAGGCTTACGACCCCTTATTTACCGAG  
AAAGCTCACAAGAAGTCTAACTCATGCCCCATGTCTAACAACATGGCTTTCTCAACTTTTAAAGGATAACAGCTATCC  
ATTGGTCTTAGGCCCAAAAATTTTGGTGCAACTCCAAAT  
AAAAGTAATAACCATGCACACTACTATAACCACCCTAACCTGACTTCCCTAATTCCCCCATCCTTACCACCCTCGTTA  
ACCCTAACAAAAAACTCATACCCCATTTATGTAAAATC  
CATTGTGCGATCCACCTTTATTATCAGTCTCTTCCCCACAACAATATTCATGTGCCTAGACCAAGAAGTTATTATCTCGA  
ACTGACACTGAGCCACAACCCAAACAACCCAGCTCTCCCT  
AAGCTTCAAACCTAGACTACTTCTCCATAATATTCATCCCTGTAGCATTGTTTCGTTACATGGTCCATCATAGAATTCTCAC  
TGTGATATATAAACTCAGACCCAAACATTAATCAGTTCTT  
CAAATATCTACTCATTTTTCTAATTACCATACTAATCTTAGTTACCGCTAACAACTATTCCAAGTTCATCGGCTGAG  
AGGGCGTAGGAATTATATCCTTCTTGCTCATCAGTTGATG  
ATACGCCCAGCAGATGCCAACACAGCAGCCATTCAAGCAATCCTATACAACCGTATCGGCGATATCGGTTTCATCCTCG  
CCTTAGCATGATTTATCCTACACTCCAACTCATGAGACCC  
ACAACAATAGCCCTTCTAAACGCTAATCCAAGCCTCACCCACTACTAGGCCTCCTCCTAGCAGCAGCAGGCAAATCAG  
CCCAATTAGGTCTCCACCCCTGACTCCCTCAGCCATAGA  
AGGCCCCACCCAGTCTCAGCCCTACTCCACTCAAGCACTATAGTTGTAGCAGGAGTCTTCTTACTCATCCGCTTCCACC  
CCCTAGCAGAAAATAGCCCACTAATCCAACTCTAACACT  
ATGCTTAGGCGCTATCACCCTCTGTTTCGAGCAGTCTGCGCCCTTACACAAAATGACATCAAAAAATCGTAGCCTTCT  
CCACTTCAAGTCAACTAGGACTCATAATAGTTACAATCGG  
CATCAACCAACCACACCTAGCATTCTGCACATCTGTACCCACGCCTTCTTCAAAGCCATACTATTTATGTGCTCCGGGT  
CCATCATCCACAACCTTAACAATGAACAAGATATTCGAAA  
AATAGGAGGACTACTCAAACCATACCTCTCACTTCAACCTCCCTCACCATTTGGCAGCCTAGCATTAGCAGGAATACCTT  
TCCTCACAGGTTTTCTACTCCAAAGACCACATCATCGAAAC  
CGCAAACATATCATACACAAACGCCTGAGCCCTATCTATTACTCTCATCGCTACCTCCCTGACAAGCGCCTATAGCACTC  
GGATAATTCTTCTCACCCCTAACAGGTCAACCTCGCTTCCC  
CACCTTACTAACATTAACGAAAATAACCCACCCCTACTAAACCCATTAAACGCCTGGCAGCCGGAAGCCTATTTCGAG  
GATTTCTCATTACTAACAAACATTTCCCCCGCATCCCCCTT  
CCAAACAACAATCCCCCTCTACCTAAAACCTCACAGCCCTCGCTGTCACTTTCTTAGGACTTCTAACAGCCCTAGACCTCA  
ACTACCTAACCAACAACCTTAAAATAAAATCCCCACCATG  
CACATTTTATTTCTCAAACATACTCGGATTCTACCCTAGCATCACACACCCGCACAATCCCCTATCTAGGCCTTCTTACGA  
GCCAAAACCTGCCCCTACTCCTCCTAGACCTAACCTGACT  
AGAAAAGCTATTACCTAAAACAATTTACAGCACCAAATCTCCACCTCCATCATCACCTCAACCCAAAAAGGCATAATTA  
AACTTTACTTCCCTCTCTTTCTTCTTCCACTCATCCTAAC  
CCTACTCCTAATCACATAACCTATTCCCCCGAGCAATCTCAATTACAATATATACACCAACAACAATGTTCAACCAGTA  
ACTACTACTAATCAACGCCATAATCATACAAAGCCCCCG  
CACCAATAGGATCCTCCCGAATCAACCCTGACCCTTCTCCTTATAAATTATTAGCTTCTTACACTATTAAGTTTACC  
ACAACCACCACCCCATCATACTCTTTACCCACAGCACCA  
ATCCTACCTCCATCGCTAACCCCACTAAAACACTCACCAAGACCTCAACCCCTGACCCCATGCCTCAGGATACTCCTCA  
ATAGCCATCGCTGTAGTATATCAAAGACAACCATCATTC  
CCCCTAAATAAATTAATAAACTATTAACCCATATAACCTCCCCAAAATTCAGAATAATAACACACCCGACCACACCG  
CTAACAAATCAATACTAAACCCCATAAATAGGAGAAGGCT  
TAGAAGAAAACCCCAAAACCCCATTAATAACCCCACTCAACAGAAAACAAGCATAACATCATTATTCTCGCACGGACT  
ACAACCACGACCAATGATATGAAAAACCATCGTTGTATTT  
CAACTACAAGAACAATGACCCCAATACGCAAAATTAACCCCTAATAAAATTAATTAACCACTCATTATCATCGACCTC  
CCCACCCCATCAAACATCTCCGCATGATGAACTTCGGCT  
CACTCCTTGGCGCCTGCCTGATCCTCAAATCACACAGGACTATTCTAGCCATGCACTACTCACCAGACGCCTCAACC  
GCCTTTTTCATCAATCGCCACATCACTCGAGACGTAAATT  
ATGGCTGAATCATCCGCTACCTTACGCAATGGCGCCTCAATATTCTTTATCTGCCTCTTCTTACACATCGGGCGAGGC  
CTATATTACGGATCATTCTCTACTCAGAAACCTGAAACA  
TCGGCATTATCCTCCTGCTTGCAACTATAGCAACAGCCTTCATAGGCTATGTCTCCTCCCGTGAGGCCAAATATCATTCTGA  
GGGGCCACAGTAATTACAACTTACTATCCGCCATCCCAT  
ACATTGGGACAGACCTAGTTCAATGAATCTGAGGAGGCTACTCAGTAGACAGTCCCACCCTCACACGATTCTTTACCTTT  
CACTTCATCTTACCCTTCATTATTGCAGCCCTAGCAGCAC  
TCCACCTCCTATTCTTGACGAAACGGGATCAAACAACCCCTAGGAATCACCTCCCATTCCGATAAAATCACCTTCCAC  
CCTTACTACACAATCAAAGACGCCCTCGGCTTACTTCTCT

TCCTTCTCTCCTTAATGACATTAACACTATTCTCACCAGACCTCCTAGGCGACCCAGACAATTATACCCCTAGCCAACCCC  
TTAAACACCCCCTCCCCACATCAAGCCCGAATGATATTTCC  
TATTTCGCCTACACAATTCTCCGATCCGTCCCTAACAACTAGGAGGCGTCTTGGCCCTATTACTATCCATCCTCATCCTA  
GCAATAATCCCCATCCTCCATATATCCAAACAACAAAGCA  
TAATATTTTCGCCCACTAAGCCAATCACTTTATTGACTCCTAGCCGAGACCTCCTCATTCTAACCTGAATCGGAGGACAA  
CCAGTAAGCTACCCTTTTACCATCATTGGACAAGTAGCAT  
CCGTACTATACTTCAACAATCCTAATCCTAATACCAACTATCTCCCTAATTGAAAACAAAATACTCAAATGGGCCTGT  
CCTTGTAGTATAAACTAATACACCAGTCTTGTAAACCGGA  
GATGAAAACCTTTTTTCCAAGGACAAATCAGAGAAAAAGTCTTTAACTCCACCATTAGCACCCAAAGCTAAGATTCTAATT  
TAAACTATT

#EUROPE Dutch

CCACAGTTTATGTAGCTTACCTCCTCAAAGCAATACACTGAAAATGTTTGTAGACGGGCTCACATCACCCCATAAACAAATA  
GGTTTGGTCTAGCCTTTCTATTAGCTCTTAGTAAGATTA  
CACATGCAAGCATCCCCGTTCCAGTGAGTCCACCCTCTAAATCACCACGATCAAAAGGGACAAGCATCAAGCACGCAGCA  
ATGCAGCTCAAAACGCTTAGCCTAGCCACACCCCCACGGG  
AAACAGCAGTGATTAACCTTTAGCAATAAACGAAAGTTTAACTAAGCTATACTAACCCAGGGTGGTCAATTTTCGTGCC  
AGCCACCGCGGTACACAGATTAACCCAAGTCAATAGAAGC  
CGGCGTAAAGAGTGTTTTAGATCACCCCTCCCCAATAAAGCTAAAACCTCACCTGAGTTGTAAAAAACTCCAGTTGACAC  
AAAATAGACTACGAAAGTGGCTTTAACATATCTGAACACA  
CAATAGCTAAGACCCAAACTGGGATTAGATACCCCACTATGCTTAGCCCTAAACCTCAACAGTTAAATCAACAAAACCTGC  
TCGCCAGAACACTACGAGCCACAGCTTAAAACCTCAAAGGA  
CCTGGCGGTGCTTCATATCCCTCTAGAGGAGCCTGTTCTGTAATCGATAAACCCCGATCAACCTCACCCCTCTTGCTCA  
GCCTATATACCGCCATCTTCAGCAAACCTGATGAAGGCT  
ACAAAGTAAGCGCAAGTACCCACGTAAAGACGTTAGGTCAAGGTGTAGCCCATGAGGTGGCAAGAAATGGGCTACATTTT  
CTACCCAGAAAACCTACGATAGCCCTTATGAAACTTAAGG  
GTCGAAGGTGGATTTAGCAGTAAACTGAGAGTAGAGTGCTTAGTTGAACAGGGCCCTGAAGCGGTACACACCGCCCGTC  
ACCCTCCTCAAGTATACTTCAAAGGACATTTAACTAAAAC  
CCCTACGCATTTATATAGAGGAGACAAGTCGTAACATGGTAAGTGTACTGGAAAGTGCCTTGGACGAACCAGAGTGTAG  
CTTAACACAAAGCACCCAACCTTACACTTAGGAGATTTCAA  
CTTAACTTGACCGCTCTGAGCTAAACCTAGCCCCAAACCCACTCCACCTTACTACCAGACAACCTTAGCCAAACCATTTA  
CCCCAATAAAGTATAGGCGATAGAAATTGAAACCTGGCGC  
AATAGATATAGTACCGCAAGGGAAAGATGAAAAATTATAACCAAGCATAATATAGCAAGGACTAACCCCTATACCTTCTG  
CATAATGAATTAAGTAACTAGAAATAACTTTGCAAGGAGAGCCA  
AAGCTAAGACCCCCGAAACCAGACGAGCTACCTAAGAACAGCTAAAAGAGCACACCCCGTCTATGTAGCAAAATAGTGGGA  
AGATTTATAGGTAGAGGGCAGACAAACCTACCGAGCCTGGTG  
ATAGCTGGTTGTCCAAGATAGAATCTTAGTTCAACTTTAAATTTGCCACAGAACCCTCTAAATCCCCTTGTAATTTAA  
CTGTTAGTCCAAGAGGAACAGCTCTTTGGACACTAGGAA  
AAAACCTTGTAGAGAGAGTAAAAAA-  
TTTTAACCCCATAGTAGGCCTAAAAGCAGCCACCAATTAAGAAAGCGTTCAAGCTCAACACCCACTACCTAAAAAA-  
TCCCAAACATATAACTG  
AACTCCTCACACCCAATTGGACCAATCTATCACCCCTATAGAAGAACTAATGTTAGTATAAGTAACATGAAAACATTCTCC  
TCCGCATAAGCCTGCGTCAGATTAAAAACACTGAACTGACA  
ATTAACAGCCCAATATCTACAATCAACCAACAAGTCATTATTACCCTCACTGTCAACCCAACACAGGCATGCTCATAAGG  
AAAGGTTAAAAAAGTAAAAGGAACTCGGCAAATCTTACC  
CCGCCTGTTTACCAAAAACATCACCTCTAGCATCACAGTATTAGAGGCACCGCCTGCCAGTGACACATGTTTAAACGGC  
CGCGGTACCCTAACCGTGCAAAGGTAGCATAATCACTTGT  
TCCTTAAATAGGGACCTGTATGAATGGCTCCACGAGGGTTTCAGCTGTCTCTTACTTTTAAACAGTGAAATTGACCTGCC  
GTGAAGAGGCGGCATAACACAGCAAGACGAGAAGACCTT  
ATGGAGCTTTAATTTATTAATGCAAACAGTACCTAACAAACCCACAGGTCCTAAACTACCAAACCTGCATTAATAAATTTT  
GGTTGGGGCGACCTCGGAGCAGAACCCAACCTCCGAGCAG  
TACATGCTAAGACTTCACCAGTCAAAGCGAACTACTATACTCAATTGATCCAATAACTTGACCAACGGAACAAGTTACCC  
TAGGGATAACAGCGCAATCCTATTCTAGAGTCCATATCAA  
CAATAGGGTTTACGACCTCGATGTTGGATCAGGACATCCCGATGGTGCAGCCGCTATTAAGGTTTCGTTTGTTCACCGAT  
TAAAGTCTACGTGATCTGAGTTCAGACCGGAGTAATCCA  
GGTCGGTTTCTATCTACTTCAAATTCCTCCCTGTACGAAAGGACAAGAGAAATAAGGCCTACTTCACAAAGCGCCTTCCC  
CCGTAAATGATATCATCTCAACTTAGTATTATACCCACAC

CCACCCAAGAACAGGGTTTTGTTAAGATGGCAGAGCCCGGTAATCGCATAAAACTTAAAACCTTTACAGTCAGAGGTTCAAT  
TCCTCTTCTTAACAACATACCCATGGCCAACCTCCTACTC  
CTCATTGTACCCATTCTAATCGCAATGGCATTCTAATGCTTACCGAACGAAAAATTCTAGGCTATATACAACCTACGCAA  
AGGCCCAACGTTGTAGGCCCTACGGGCTACTACAACCC  
TTCGCTGACGCCATAAACTCTTCACCAAAGAGCCCCTAAAACCCGCCACATCTACCATCACCCCTCTACATCACCGCCCC  
GACCTTAGCTCTCACCATCGCTCTTCTACTATGAACCCCC  
CTCCCCATACCCAACCCCTGGTCAACCTCAACCTAGGCCTCCTATTTATTCTAGCCACCTCTAGCCTAGCCGTTTACTC  
AATCCTCTGATCAGGGTGAGCATCAAACCTCAAACCTACGCC  
CTGATCGGCGCACTGCGAGCAGTAGCCCAAACAATCTCATATGAAGTCACCCTAGCCATCATTCTACTATCAACATTACT  
AATAAGTGGCTCCTTTAACCTCTCCACCCTTATCACAACA  
CAAGAACACCTCTGATTACTCCTGCCATCATGACCCTTGGCCATAATATGATTTATCTCCACACTAGCAGAGACCAACCG  
AACCCCTTCGACCTTGGCGAAGGGGAGTCCGAACCTAGTC  
TCAGGCTTCAACATCGAATACGCCGAGGCCCTTCGCCCTATTCTTCATAGCCGAATACACAAACATTATTATAATAAA  
CACCCCTCACCACTACAATCTTCTAGGAACAACATATGAC  
GCACTCTCCCCTGAACTCTACACAACATATTTTTGTACCAAGACCCTACTTCTAACCTCCCTGTTCTTATGAATTCGAAC  
AGCATACCCCGATTCCGCTACGACCAACTCATAACCTC  
CTATGAAAAAATCTCCTACCCTCACCCCTAGCATTACTTATATGATATGTCTCCATACCCATTACAATCTCCAGCATTCC  
CCCTCAAACCTAAGAAATATGTCTGATAAAAAGAGTTACTT  
TGATAGAGTAAATAATAGGAGCTTAAACCCCTTATTTCTAGGACCATGAGAATCGAACCCATCCCTGAGAATCCAAAAT  
TCTCCGTGCCACCTATCACACCCATCCTAAAGTAAGGTC  
AGCTAAATAAGCTATCGGGCCATACCCCGAAAATGTTGGTTATACCCCTCCCGTACTAATTAATCCCTGGCCCAACCC  
GTCATCTACTCTACCATCTTTCGAGGCACACTCATCACAG  
CGCTAAGCTCGCACTGATTTTTTACCTGAGTAGGCCTAGAAATAAACATGCTAGCTTTTTATTCCAGTTCTAACCAAAAA  
ATAAACCTCGTTCCACAGAAGCTGCCATCAAGTATTTCC  
TCACGCAAGCAACCGCATCCATAATCCTTCTAATAGCTATCCTCTTCAACAATATACTCTCCGGACAATGAACCATAACC  
AATACTACCAATCAATACTCATCATTAATAATCATAATGG  
CTATAGCAATAAACTAGGAATAGCCCCCTTCACTTCTGAGTCCCAGAGGTTACCCAAGGCACCCCTCTGACATCCGGC  
CTGCTTCTTCTCACATGACAAAAACTAGCCCCATCTCAA  
TCATATACCAATCTCTCCCTCACTAAACGTAAGCCTTCTCCTCACTCTCTCAATCTTATCCATCATAGCAGGCAGTTGA  
GGTGGATTAACCAACCCAGCTACGCAAAAATCTTAGCAT  
ACTCCTCAATTACCCACATAGGATGAATAATAGCAGTTCTACCGTACAACCCTAACATAACCATTCTTAATTTAACTATT  
TATATTATCCTAACTACTACCGCATTCTACTACTCAACT  
TAAACTCCAGCACCACGACCCTACTACTATCTCGCACCTGAAACAAGCTAACATGACTAACACCCTTAATTCCATCCACC  
CTCCTCTCCCTAGGAGGCCTGCCCGCTAACCGGCTTTT  
TGCCCAAATGGGCCATTATCGAAGAATTCACAAAAACAATAGCCTCATCATCCCCACCATCATAGCCACCATCACCCCTC  
CTTAACCTCTACTTCTACCTACGCCTAATCTACTCCACCT  
CAATCACACTACTCCCATATCTAACAACGTAATAAATAAATGACAGTTTGAACATACAAAACCCACCCATTCTCCCC  
ACACTCATCGCCCTTACCACGCTACTCCTACCTATCTCCC  
CTTTTATACTAATAATCTTATAGAAATTTAGGTTAAATACAGACCAAGAGCCTTCAAAGCCCTCAGTAAGTTGCAATACT  
TAATTTCTGTAACAGCTAAGGACTGCAAAACCCACTCTG  
CATCAACTGAACGCAATCAGCCACTTTAATTAAGCTAAGCCCTTACTAGACCAATGGGACTTAAACCCACAAACACTTA  
GTTAACAGCTAAGCACCCCTAATCAACTGGCTTCAATCTAC  
TTCTCCCGCCGCGGGAAAAAGGCGGGAGAAGCCCGGCAGGTTTGAAGCTGCTTCTTCGAATTTGCAATTCATATGA  
AAATCACCTCGGAGCTGGTAAAAAGAGGCCTAACCCCTGT  
CTTTAGATTTACAGTCCAATGCTTCACTCAGCCATTTTACCTCACCCCC-  
ACTGATGTTCCGCCACCGTTGACTATTCTCTACAAACCACAAAGACATTGGAACACTATACTATTATTTC  
GGCGCATGAGCTGGAGTCTTAGGCACAGCTCTAAGCCTCCTTATTTCGAGCCGAGCTGGGCCAGCCAGGCAACCTTCTAGG  
TAACGACCACATCTACAACGTTATCGTCACAGCCCATGCA  
TTTGTAATAATCTTCTTCATAGTAATACCCATCATAATCGGAGGCTTTGGCAACTGACTAGTTCCCTAATAATCGGTGC  
CCCCGATATGGCGTTTTCCCGCATAAACAACATAAGCTTC  
TGACTCTTACCTCCCTCTCTCCTACTCCTGCTCGCATCTGCTATAGTGGAGGCCGAGCAGGAACAGGTTGAACAGTCTA  
CCCTCCCTTAGCAGGGAACCTACTCCACCCTGGAGCCTCC  
GTAGACCTAACCATCTTCTCCTTACACCTAGCAGGTGTCTCCTCTATCTTAGGGGCCATCAATTTTCATCACAACAATTAT  
CAATATAAAAACCCCTGCCATAACCCAATACCAAACGCC  
CTCTTCGTCTGATCCGTCTAATCACAGCAGTCTACTTCTCCTATCTCTCCAGTCTTAGCTGCTGGCATCACTATACT  
ACTAACAGACCGCAACCTCAACACCACCTTCTTCGACCCC

GCCGGAGGAGGAGACCCATTCTATAACCAACACCTATTCTGATTTTTTCGGTCACCCTGAAGTTTATATTCTTATCCTACC  
AGGCTTCGGAATAATCTCCCATATTGTAACCTTACTACTCC  
GGAAAAAAGAACCATTTGGATACATAGGTATGGTCTGAGCTATGATATCAATTGGCTTCCTAGGGTTTATCGTGTGAGC  
ACACCATATATTTACAGTAGGAATAGACGTAGACACACGA  
GCATATTTACCTCCGCTACCATAATCATCGCTATCCCCACCGGCGTCAAAGTATTTAGCTGACTCGCCACACTCCACGG  
AAGCAATATGAAATGATCTGCTGCAGTGCTCTGAGCCCTA  
GGATTCATCTTTCTTTTACCCTAGGTGGCCTGACTGGCATTGTATTAGCAAACCTCATCACTAGACATCGTACTACACGA  
CACGTACTACGTTGTAGCCCACTTCCACTATGTCCTATCA  
ATAGGAGCTGTATTTGCCATCATAGGAGGCTTCATTCACTGATTTCCCTATTCTCAGGCTACACCCTAGACCAAACCTA  
CGCCAAAATCCATTTCACTATCATATTCATCGGCGTAAAT  
CTAATTTCTTTCCACAACACTTTCTCGGCCTATCCGGAATGCCCCGACGTTACTCGGACTACCCCGATGCATACACCAC  
ATGAAACATCCTATCATCTGTAGGCTCATTCAATTTCTCTA  
ACAGCAGTAATATTAATAATTTTTCATGATTTTGAGAAGCCTTCGCTTCGAAGCGAAAAGTCTAATAGTAGAAGAACCCTC  
CATAAACCTGGAGTGACTATATGGATGCCCCCACCCTAC  
CACACATTCGAAGAACCCGTATAATAAATCTAGACAAAAAGGAAGGAATCGAACCCCCCAAAGCTGGTTTTCAAGCCA  
ACCCCATGGCCTCCATGACTTTTTCAAAAAGGTATTAGAA  
AAACCATTTATAACTTTGTCAAAGTTAAATTATAGGCTAAATCCTATATATCTTAATGGCACATGCAGCGCAAGTAGGT  
CTACAAGACGCTACTTCCCCTATCATAGAAGAGCTTATCA  
CCTTTTCATGATCACGCCCTATAATCATTTTCTTATCTGCTTCTTAGTCTGTATGCCCTTTTCTAACACTCACAACA  
AACTAACTAATACTAACATCTCAGACGCTCAGGAAATAG  
AAACCGTCTGAACTATCCTGCCCCCATCATCTAGTCTCATCGCCCTCCCATCCCTACGCATCCTTTACATAACAGAC  
GAGGTCAACGATCCCTCCCTTACCATCAAATCAATTGGCC  
ACCAATGGTACTGAACCTACGAGTACACCGACTACGGCGGACTAATCTTCAACTCCTACATACTTCCCCATTATTCTTA  
GAACCAGGCGACCTGCGACTCCTTGACGTTGACAATCGAG  
TAGTACTCCCGATTGAAGCCCCCATTTCGTATAATAATTACATCACAAGACGTCTTGCCTCATGAGCTGTCCCCACATTA  
GGCTTAAAAACAGATGCAATTCGCGGACGTCTAAACAAA  
CCACTTTACCGCTACACGACCGGGGTATACTACGGTCAATGCTCTGAAATCTGTGGAGCAAACCACAGTTTTCATGCC  
ATCGTCTAGAAATTAATTTCCCTAAAAATCTTTGAAATAG  
GGCCCGTATTTACCCTATAGCACCCCTCTACCCCTCTAGAGCCCACTGTAAAGCTAACTTAGCATTAACTTTTAAAGT  
TAAAGATTAAGAGAACCAACACCTCTTTACAGTGAAATGC  
CCCAACTAAATACTACCGTATGGCCACCATAATTACCCCATACTCCTTACACTATTCTCATCACCCAATAAAAAATA  
TTAAACACAACTACCACCTACCTCCCTCACCAAAGCCCA  
TAAAAATAAAAAATTATAACAAACCCTGAGAACCAAAATGAACGAAAATCTGTTTCGCTTTCATTATTGCCCCCAATCC  
TAGGCCTACCCGCGCAGTACTGATCATTCTATTTCCCC  
TCTATTGATCCCCACCTCCAAATATCTCATCAACAACCGACTAATCACCACCAACAATGACTAATCAAATAACCTCAA  
AACAAATGATAACCATAACAACTAAAGGACGAACCTG  
ATCTCTTATACTAGTATCCTTAATCATTTTTATTGCCACAATAACCTCCTCGGACTCCTGCCTCACTCATTTACACCAA  
CCACCAACTATCTATAAACCTAGCCATGGCCATCCCCTT  
ATGAGCGGGCGCAGTGATTATAGGCTTTTCGCTCTAAGATTAAAAATGCCCTAGCCCACTTCTTACCACAAGGCACACCTA  
CACCCCTTATCCCATACTAGTTATTATCGAAACCATCAG  
CCTACTCATTCAACCAATAGCCCTGGCCGTACGCCTAACCCTAACCCTAACCCTAACCCTAACCCTAACCCTAACCCTA  
GAAGCGCCACCCTAGCAATATCAACCATTAACCTTCCCTC  
TACTTATCATCTTACAATTCTAATTCTACTGACTATCCTAGAAATCGCTGTGCCTTAATCCAAGCCTACGTTTTCA  
CACTTCTAGTAAGCCTCTACCTGCACGACAACACATAATG  
ACCCACCAATCACATGCCTATCATATAGTAAAACCCAGCCCATGACCCTAACAGGGGCCCTCTCAGCCCTCCTAATGAC  
CTCCGGCCTAGCCATGTGATTTCACTTCCACTCCATAACG  
CTCCTCATACTAGGCCTACTAACCAACACACTAACCATATACCAATGATGGCGGATGTAACACGAGAAAGCACATACCA  
AGGCCACCACACACCACCTGTCCAAAAGGCCTTCGATAC  
GGGATAATCCTATTTATTACCTCAGAAGTTTTTTTTCTTCGAGGATTTTTCTGAGCCTTTTACCCTCCAGCCTAGCCCC  
TACCCCAATTAGGAGGGCACTGGCCCCAACAGGCATC  
ACCCCGCTAAATCCCCTAGAAGTCCCCTCCTAAACACATCCGTATTACTCGCATCAGGAGTATCAATCACCTGAGCTCA  
CCATAGTCTAATAGAAAACAACCGAAACCAAATAATTCAA  
GCACTGCTTATTACAATTTTACTGGGTCTCTATTTTACCCTCCTACAAGCCTCAGAGTACTTTCGAGTCTCCCTTACCAT  
TTCCGACGGCATCTACGGCTCAACATTTTTTTGTAGCCACA  
GGCTTCCACGGACTTCACGTCAATTTGGCTCAACTTTCTCACTATCTGCTTCATCCGCCAACTAATATTTCACTTTAC  
ATCCAAACATCACTTTGGCTTCGAAGCCGCCGCTGATAC

TGGCATTGTTGTAGATGTGGTTTGACTATTTCTGTATGTCTCCATCTATTGATGAGGGTCTTACTCTTTTAGTATAAATAG  
TACCGTTAACTTCCAATTAAGTATTTTGGACAACATTCAA  
AAAAGAGTAATAAACTTCGCCTTAATTTTAATAATCAACACCCTCCTAGCCTTACTACTAATAATTATTACATTTTGACT  
ACCACAACCTCAACGGCTACATAGAAAAATCCACCCCTTAC  
GAGTGC GGCTTCGACCCTATATCCCCCGCCGCGTCCCTTTCTCCATAAAATTCTTCTTAGTAGCTATTACCTTCTTATT  
ATTTGATCTAGAAATTGCCCTCCTTTTACCCCTACCATGA  
GCCCTACAAACAACCTAACCTGCCACTAATAGTTATGTCATCCCTCTTATTAATCATCATCCTAGCCCTAAGTCTGGCCTA  
TGAGTGACTACAAAAAGGATTAGACTGAACCGAATTGGTA  
TATAGTTTAAACAAAACGAATGATTTGACTCATTAAATTATGATAATCATATTTACCAAATGCCCTCATTACATAAA  
TATTATACTAGCATTACCATCTCACTTCTAGGAATACTA  
GTATATCGCTCACACCTCATATCCTCCCTACTATGCCTAGAAGGAATAATACTATCGCTGTTTATTATAGCTACTCTCAT  
AACCTCAACACCCTCCTCTTAGCCAATATTGTGCCT  
ATTGCCATACTAGTCTTTGCCGCTGCGAAGCAGCGGTGGGCTAGCCCTACTAGTCTCAATCTCCAACACATATGGCCT  
AGACTACGTACATAACCTAAACCTACTCCAATGCTAAAAC  
TAATCGTCCCAACAATTATATTACTACCCTGACATGACTTTCCAAAAACACATAATTTGAATCAACACAACCACCCAC  
AGCCTAATTATTAGCATCATCCCTCTACTATTTTTTAAAC  
AAATCAACAACAACCTATTTAGCTGTTCCCAACCTTTTCTCCGACCCCTAACACCCCTCCTAATACTAACTACC  
TGACTCCTACCCCTCACAATCATGGCAAGCCAACGCCACT  
TATCCAGTGAACCACTATCACGAAAAAACTCTACCTCTCTATACTAATCTCCCTACAAATCTCCTTAATTATAACATTC  
ACAGCCACAGAATAATCATATTTTATATCTTCTTCGAAA  
CCACACTTATCCCCACCTTGGCTATCATACCCGATGAGGCAACCAGCCAGAACGCCTGAACGCAGGCACATACTTCTTA  
TTCTACACCCTAGTAGGCTCCCTTCCCCTACTCATCGCAC  
TAATTTACACTCACAACACCCTAGGCTCACTAAACATTCTACTACTCACTCTCACTGCCAAGAACTATCAAACCTCTGA  
GCCAACAACCTAATATGACTAGCTTACACAATAGCTTTTA  
TAGTAAAGATACCTCTTTACGGACTCCACTTATGACTCCCTAAAGCCCATGTGGAAGCCCATCGCTGGGTCAATAGTA  
CTTGCCGCGACTCTTAAAACCTAGGCGGCTATGGTATAA  
TAGCCTCACACTCATTCTCAACCCCTGACAAAACACATAGCCTACCCCTTCTTGTACTATCCCTATGAGGCATAATT  
ATAACAAGCTCCACTCTGCCTACGACAAAACAGACATAAAAT  
CGCTCATTGCATACTCTTCAATCAGCCACATAGCCCTCGTAGTAACAGCCATTCTCATCCAACCCCTGAAGCTTACC  
GGCGCAGTCACTTCTATAATCGCCACGGGCTTACATCCT  
CATTACTATTCTGCCTAGCAAACCTCAAACCTACGAACGCCTCACAGTCGCATCATAATCCTCTCTCAAGGACTTCAAAC  
CTACTCCCACTAATAGCTTTTTGATGACTTCTAGCAAGCC  
TCGCTAACCTCGCCTTACCCCCACTATTAACCTACTGGGAGAACTCTCTGTGCTAGTAACCACGTTCTCCTGATCAAAT  
ATCACTCTCCTACTTACAGGACTCAACATACTAGTCACAG  
CCCTATACTCCCTCTACATATTTACCACAACACAATGGGGCTCACTCACCCACCACATTAACAACATAAAACCCTCATTC  
ACACGAGAAAACACCCTCATGTTTATACACCTATCCCCCA  
TTCTCCTCCTATCCCTCAACCCCGACATCATTACGGGTTTTCTCTTGTAAATATAGTTTAAACAAAACATCAGATTGT  
GAATCTGACAACAGAGGCTTACGACCCCTTATTTACCGAG  
AAAGCTCACAAGAAGTCTAATCATGCCCCATGTCTAACAACATGGCTTTCTCAACTTTTAAAGGATAACAGCTATCC  
ATTGGTCTTAGGCCCAAAAATTTTGGTGCAACTCCAAAT  
AAAAGTAATAACCATGCACACTACTATAACCACCCTAACCTGACTTCCCTAATTTCCCCCATCCTTGCCACCCTCGTTA  
ACCCTAACAAAAAACTCATACCCCTATTATGTAATC  
CATTGTGCATCCACCTTTATTATCAGTCTTCCCCACAACAATATTCATGTGCCTAGACCAAGAAGTTATTATCTCGA  
ACTGACACTGAGCCACAACCCAAACAACCCAGCTCTCCCT  
AAGCTTCAAACCTAGACTACTTCTCCATAATATTCATCCCTGTAGCATTGTTGTTACATGGTCCATCATAGAATTCTCAC  
TGTGATATATAAACTCAGACCCAAACATTAATCAGTTCTT  
CAAATATCTACTCATCTTCTAATTACCATACTAATCTTAGTTACCGCTAACAACTATTCCAACCTGTTTATCGGCTGAG  
AGGGCGTAGGAATTATATCCTTCTTGTCTCATCAGTTGATG  
ATACGCCCAGCAGATGCCAACACAGCAGCCATTCAAGCAATCCTATAACAACCGTATCGGCGATATCGGTTTATCCTCG  
CCTTAGCATGATTTATCCTACTCCAACCTCATGAGACCC  
ACAACAATAGCCCTTCTAAACGCTAATCCAAGCCTCACCCCACTACTAGGCCTCCTCCTAGCAGCAGCAGGCAAATCAG  
CCCAATTAGGTCTCCACCCCTGACTCCCTCAGCCATAGA  
AGGCCCCACCCAGTCTCAGCCCTACTCCACTCAAGCACTATAGTTGTAGCAGGAATCTTCTTACTCATCCGCTTCCACC  
CCCTAGCAGAAAATAGCCCACTAATCCAACTCTAACACT  
ATGCTTAGGCGCTATCACCCTCTGTTGCGCAGCAGTCTGCGCCCTTACACAAAATGACATCAAAAAATCGTAGCCTTCT  
CCACTTCAAGTCAACTAGGACTCATAATAGTTACAATCGG

CATCAACCAACCACACCTAGCATTCTGCACATCTGTACCCACGCCTTCTTCAAAGCCATACTATTTATGTGCTCCGGGT  
CCATCATCCACAACCTTAACAATGAACAAGATATTCGAAA  
AATAGGAGGACTACTCAAACCATACCTCTCACTTCAACCTCCCTCACCATTGGCAGCCTAGCATTAGCAGGAATACCTT  
TCCTCACAGGTTTTCTACTCCAAAGACCACATCATCGAAAC  
CGCAAACATATCATACACAAACGCCTGAGCCCTATCTATTACTCTCATCGCTACCTCCCTGACAAGCGCCTATAGCACTC  
GAATAATTCTTCTCACCCCTAACAGGTCAACCTCGCTTCCC  
CACCCCTTACTAACATTAACGAAAATAACCCCACCCTACTAAACCCCATTAACGCCTGGCAGCCGGAAGCCTATTTCGCAG  
GATTTCTCATTACTAACAACATTTCCCCCGCATCCCCCTT  
CCAAACAACAATCCCCCTCTACCTAAAACCTCACAGCCCTCGCTGTCACTTTCTTAGGACTTCTAACAGCCCTAGACCTCA  
ACTACCTAACCAACAACTTAAAAATAAAATCCCCACTATG  
CACATTTTATTTCTCAACATACTCGGATTCTACCCTAGCATCACACACCGCACAAATCCCCTATCTAGGCCTTCTTACGA  
GCCAAAACCTGCCCTACTCCTCCTAGACCTAACCTGACT  
AGAAAAGCTATTACCTAAAACAATTTACAGCACCAAATCTCCACCTCCATCATCACCTCAACCCAAAAAGGCATAATTA  
AACTTTACTTCTCTCTTTCTTCTTCCACTCATCCTAAC  
CCTACTCCTAATCACATAACCTATTCCCCGAGCAATCTCAATTACAATATATACACCAACAAACAATGTTCAACCAGTA  
ACTACTACTAATCAACGCCATAATCATACAAAGCCCCCG  
CACCAATAGGATCCTCCCGAATCAACCCTGACCCCTCTCCTTCATAAATTATTTCAGCTTCTTACACTATTAAGTTTACC  
ACAACCACCACCCCATCATACTCTTTCACCCACAGCACCA  
ATCCTACCTCCATCGCTAACCCCACTAAAACACTCACCAAGACCTCAACCCCTGACCCCATGCCTCAGGATACTCCTCA  
ATAGCCATCGCTGTAGTATATCCAAAGACAACCATCATT  
CCCCTAAATAAATTAAAAAACTATTAACCCATATAACCTCCCCAAAATTGAGAATAATAACACACCCGACCACACCG  
CTAACAATCAATACTAAACCCCATAAATAGGAGAAGGCT  
TAGAAGAAAACCCACAAACCCCATTAATAACCCACACTCAACAGAAACAAAGCATAACATCATTATTCTCGCACGGACT  
ACAACCACGACCAATGATATGAAAAACCATCGTTGTATTT  
CAACTACAAGAACACCAATGACCCCAATACGAAAACCTAACCCCTAATAAAATTAATTAACCACTCATTTCATCGACCTC  
CCCACCCCATCCAACATCTCCGCATGATGAAACTTCGGCT  
CACTCCTTGGCGCCTGCCTGATCCTCCAAATCACACAGGACTATTCTAGCCATGCACTACTCACAGACGCCTCAACC  
GCCTTTTCATCAATCGCCACATCACTCGAGACGTAATTT  
ATGGCTGAATCATCCGCTACCTTACGCAATGGCGCCTCAATATTCTTTATCTGCCTCTTCTACACATCGGGCGAGGC  
CTATATTACGGATCATTCTCTACTCAGAAACCTGAAACA  
TCGGCATTATCCTCCTGCTTGCAACTATAGCAACAGCCTTCATAGGCTATGTCTCCTCCCGTGAGGCCAAATATCATTCTGA  
GGGGCCACAGTAATTACAACTTACTATCCGCCATCCCAT  
ACATTGGGACAGACCTAGTTCAATGAATCTGAGGAGGCTACTCAGTAGACAGTCCCACCCTCACACGATTCTTTACCTTT  
CACTTCATCTTGCCCTTCATTATTGCAGCCCTAGCAGCAC  
TCCACCTCCTATTCTTGACGAAACGGGATCAAACAACCCCTAGGAATCACCTCCCATTCCGATAAAATCACCTTCCAC  
CCTTACTACACAATCAAAGACGCCCTCGGCTTACTTCTCT  
TCCTTCTCTCCTTAATGACATTAACACTATTCTCACCAGACCTCCTAGGCGACCCAGACAATTATACCCTAGCCAACCC  
TTAAACACCCCTCCCCACATCAAGCCCGAATGATATTTCC  
TATTGCCTACACAATTTCTCGGATCCGTCCCTAACAACTAGGAGGCGTCTTGCCTATTACTATCCATCCTCATCCTA  
GCAATAATCCCCATCCTCCATATATCCAAACAACAAGCA  
TAATATTTGCGCCACTAAGCCAATCACTTTATTGACTCCTAGCCGACACCTCCTCATTCTAACCTGAATCGGAGGACAA  
CCAGTAAGCTACCCTTTTACCATCATTGGACAAGTAGCAT  
CCGTACTATACTTCAACAATCTTAATCCTAATACCAACTATCTCCCTAATTGAAAACAAAATACTCAAATGGGCCTGT  
CCTTGTAGTATAAACTAATACACCAGTCTTGTAAACCGGA  
GATGAAAACCTTTTTCCAAGGACAAATCAGAGAAAAAGTCTTTAACTCCACCATTAGCACCCAAAGCTAAGATTCTAATT  
TAAACTATT

#EUROPE English

CCACAGTTTATGTAGCTTACCTCCTCAAAGCAATACACTGAAAATGTTTGTAGACGGGCTCACATCACCCCATAAACAAATA  
GGTTTGGTCTTAGCCTTTCTATTAGCTCTTAGTAAGATTA  
CACATGCAAGCATCCCCATTCCAGTGAGTTACCCTCTAAATCACCACGATCAAAGGGACAAGCATCAAGCACGCAGCA  
ATGCAGCTCAAACGCTTAGCCTAGCCACACCCCCACGGG  
AAACAGCAGTGATTAACCTTTAGCAATAAACGAAAGTTTAACTAAGCTATACTAACCCACAGGTTGGTCAATTTCTGTGCC  
AGCCACCGCGGTACACAGATTAACCCAAGTCAATAGAAGC  
CGGCGTAAAGAGTGTTTTATAGTACCCCCCTCCCCAATAAAGCTAAAACCTCACCTGAGTTGTAAAAAACTCCAGTTGACAC  
AAAATAGACTACGAAAGTGGCTTTAACATATCTGAACACA

CAATAGCTAAGACCCAAACTGGGATTAGATACCCCCTATGCTTAGCCCTAAACCTCAACAGTTAAATCAACAAAACCTGC  
TCGCCAGAACACTACGAGCCACAGCTTAAAACCTCAAAGGA  
CCTGGCGGTGCTTCATATCCCTCTAGAGGAGCCTGTTCTGTAATCGATAAACCCCGATCAACCTCACCACCTCTTGCTCA  
GCCTATATACCGCCATCTTCAGCAAACCCTGATGAAGGCT  
ACAAAGTAAGCGCAAGTACCCACGTAAAGACGTTAGGTCAAGGTGTAGCCCATGAGGTGGCAAGAAATGGGCTACATTTT  
CTACCCCAGAAAACCTACGATAGCCCTTATGAAACTTAAGG  
GTGCAAGGTGGATTTAGCAGTAAACTGAGAGTAGAGTGCTTAGTTGAACAGGGCCCTGAAGCGCGTACACACCGCCCGTC  
ACCCTCCTCAAGTATACTTCAAAGGACATTTAACTAAAAC  
CCCTACGCATTTATATAGAGGAGACAAGTCGTAACATGGTAAGTGTACTGGAAAGTGCACCTGGACGAACCAGAGTGTAG  
CTTAACACAAAGCACCCAACCTTACACTTAGGAGATTTCAA  
CTTAACCTTGACCGCTCTGAGCTAAACCTAGCCCCAAACCCACTCCACCTTACTACCAGACAACCTTAGCCAAAACCATTTA  
CCCAAATAAAGTATAGGCGATAGAAATTGAAACCTGGCGC  
AATAGATATAGTACCGCAAGGGAAAGATGAAAAATTATAACCAAGCATAATATAGCAAGGACTAACCCCTATACCTTCTG  
CATAATGAATTAACCTAGAAATAACTTTGCAAGGAGAGCCA  
AAGCTAAGACCCCCGAAACCAGACGAGCTACCTAAGAACAGCTAAAAGAGCACACCCCGTCTATGTAGCAAAAATAGTGGGA  
AGATTTATAGGTAGAGGCGACAAACCTACCGAGCCTGGTG  
ATAGCTGGTTGTCCAAGATAGAATCTTAGTTCAACTTTAAATTTGCCACAGAACCCTCTAAATCCCCTTGTAATTTAA  
CTGTTAGTCCAAAGAGGAACAGCTCTTTGGACACTAGGAA  
AAAACCTTGTAGAGAGAGTAAAAAA-  
TTTAACACCCATAGTAGGCCTAAAAGCAGCCACCAATTAAGAAAGCGTTCAAGCTCAACACCCACTACCTAAAAAA-  
TCCCAAACATATAACTG  
AACTCCTCACACCCAATTGGACCAATCTATCACCCCTATAGAAGAACTAATGTTAGTATAAGTAACATGAAAACATTCTCC  
TCCGCATAAGCCTGCGTCAGATTAAAAACACTGAACTGACA  
ATTAACAGCCCAATATCTACAATCAACCAACAAGTCATTATTACCCTCACTGTCAACCCAACACAGGCATGCTCATAAGG  
AAAGGTTAAAAAAGTAAAAGGAACTCGGCAAATCTTACC  
CCGCCTGTTTACCAAAAACATCACCTCTAGCATCACAGTATTAGAGGCACCCGCTGCCAGTGACACATGTTTAAACGGC  
CGCGGTACCCTAACCGTGCAAAGGTAGCATAATCACTTGT  
TCCTTAAATAGGGACCTGTATGAATGGCTCCACGAGGGTTAGCTGTCTCTTACTTTTAAACAGTGAAATTGACCTGCC  
GTGAAGAGGCGGGCATGACACAGCAAGACGAGAAGACCCCT  
ATGGAGCTTTAATTTATTAATGCAAACAGTACCTAACAAACCCACAGGTCTAAACTACCAAACCTGCATTAAAAATTT  
GGTTGGGGCGACCTCGGAGCAGAACCCAACCTCCGAGCAG  
TACATGCTAAGACTTCACCAGTCAAAGCGAACTACTATACTCAATTGATCCAATAACTTGACCAACGGAACAAGTTACCC  
TAGGGATAACAGCGCAATCCTATTCTAGAGTCCATATCAA  
CAATAGGGTTTACGACCTCGATGTTGGATCAGGACATCCCGATGGTGCAGCCGCTATTAAAGGTTTCGTTTGTTCACCGAT  
TAAAGTCTACGTGATCTGAGTTCAGACCGGAGTAATCCA  
GGTCGGTTTTCTATCTACTTCAAATTCCTCCCTGTACGAAAGGACAAGAGAAATAAGGCCTACTTCACAAAGCGCCTTCCC  
CCGTAAATGATATCATCTCAACTTAGTATTATACCCACAC  
CCACCCAAGAACAGGGTTTTGTTAAGATGGCAGAGCCCGGTAATCGCATAAACTTAAACTTTACAGTCAGAGGTTCAAT  
TCCTCTTCTTAAACAACATACCCATGGCCAACCTCCTACTC  
CTCATTGTACCCATTCTAATCGCAATGGCATTCTAATGCTTACCGAACGAAAAATTCTAGGCTATATACAACCTACGCAA  
AGGCCCAACGTTGTAGGCCCTACGGGCTACTACAACCC  
TTGCTGACGCCATAAACTCTTACCAAAGAGCCCTAAAACCCGCCACATCTACCATCACCCCTCTACATCACCGCCCC  
GACCTTAGCTCTCACCATCGCTCTTCTACTATGAACCCCC  
CTCCCCATACCCAACCCCTGGTCAACCTCAACCTAGGCCTCCTATTTATTCTAGCCACCTCTAGCCTAGCCGTTTACTC  
AATCCTCTGATCAGGGTGAGCATCAAACCTCAAACCTACGCC  
CTGATCGGCGCACTGCGAGCAGTAGCCCAAACAATCTCATATGAAGTACCCTAGCCATCATTCTACTATCAACATTACT  
AATAAGTGGCTCCTTTAACCTCTCCACCCTTATCACAACA  
CAAGAACACCTCTGATTACTCCTGCCATCATGACCCTTGCCATAATATGATTTATCTCCACACTAGCAGAGACCAACCG  
AACCCCTTCGACCTTGCCGAAGGGGAGTCCGAACCTAGTC  
TCAGGCTTCAACATCGAATACGCCGAGGCCCTTCGCCCTATTCTTCATAGCCGAATACACAAACATTATTATAATAAA  
CACCCCTACCACTACAATCTTCTAGGAACAACATATGAC  
GCACTCTCCCCTGAACTCTACACAACATATTTTGTACCAAGACCCTACTTCTAACCTCCCTGTTCTTATGAATTGAAAC  
AGCATAACCCCGATTCCGCTACGACCAACTCATAACCTC  
CTATGAAAAAATTCCTACCCTCACCCCTAGCATTACTTATATGATATGTCTCCATACCCATTACAATCTCCAGCATTCC  
CCCTCAAACCTAAGAAATATGTCTGATAAAAGAGTTACTT  
TGATAGAGTAAATAATAGGAGCTTAAACCCCTTATTTCTAGGACTATGAGAATCGAACCCATCCCTGAGAATCCAAAAT  
TCTCCGTGCCACCTATCACACCCCATCCTAAAGTAAGGTC

AGCTAAATAAGCTATCGGGCCCATACCCCGAAAATGTTGGTTATACCCTTCCCCTACTAATTAATCCCCTGGCCCAACCC  
GTCATCTACTCTACCATCTTTGCAGGCACACTCATCACAG  
CGCTAAGCTCGCACTGATTTTTTACCTGAGTAGGCCTAGAAATAAACATGCTAGCTTTTTATTCCAGTTCTAACCAAAAA  
ATAAACCCCTCGTTCCACAGAAGCTGCCATCAAGTATTTCC  
TCACGCAAGCAACCGCATCCATAATCCTTCTAATAGCTATCCTCTTCAACAATATACTCTCCGGACAATGAACCATAACC  
AATACTACCAATCAATACTCATCATTATAATAATCATAATGG  
CTATAGCAATAAACTAGGAATAGCCCCCTTTCACTTCTGAGTCCCAGAGGTTACCCAAGGCACCCCTCTGACATCCGGC  
CTGCTTCTTCTCACATGACAAAACTAGCCCCCATCTCAA  
TCATATACCAAATCTCTCCCTCACTAAACGTAAGCCTTCTCCTCACTCTCTCAATCTTATCCATCATAGCAGGCAGTTGA  
GGTGGATTAAACCAAACCCAGCTACGCAAAATCTTAGCAT  
ACTCCTCAATTACCCACATAGGATGAATAATAGCAGTTCTACCGTACAACCCTAACATAACCATTCTTAATTTAACTATT  
TATATTATCCTAACTACTACCGCATTCTACTACTCAACT  
TAAACTCCAGCACCACGACCCTACTACTATCTCGCACCTGAAAACAAGCTAACATGACTAACACCCTTAATTCCATCCACC  
CTCCTCTCCCTAGGAGGCCTGCCCCGCTAACCGGCTTTT  
TGCCCAAATGGGCCATTATCGAAGAATTCACAAAAACAATAGCCTCATCATCCCCACCATCATAGCCACCATCACCCCTC  
CTTAACCTCTACTTCTACCTACGCCTAATCTACTCCACCT  
CAATCACACTACTCCCCATATCTAACAACGTAAAAATAAAATGACAGTTTGAACATACAAAACCCACCCCATCTCCCC  
ACACTCATCGCCCTTACCACGCTACTCCTACCTATCTCCC  
CTTTTATACTAATAATCTTATAGAAATTTAGGTTAAATACAGACCAAGAGCCTTCAAAGCCCTCAGTAAGTTGCAATACT  
TAATTTCTGTAACAGCTAAGGACTGCAAAAACCCACTCTG  
CATCAACTGAACGCAAATCAGCCACTTTAATTAAGCTAAGCCCTTACTAGACCAATGGGACTTAAACCCACAAACTTA  
GTTAACAGCTAAGCACCTAATCAACTGGCTTCAATCTAC  
TTCTCCC GCCCGGGGAAAAAAGGCGGGGAGAAGCCCCGGCAGGTTTGAAGCTGCTTCTTCGAATTTGCAATTCATATGA  
AAATCACCTCGGAGCTGGTAAAAAGAGGCCTAACCCCTGT  
CTTTAGATTTACAGTCCAATGCTTCACTCAGCCATTTTACCTCACCCCC-  
ACTGATGTTCCGCCGACCGTTGACTATTCTCTACAAACCACAAAGACATTGGAACACTATACCTATTATTC  
GGCGCATGAGCTGGAGTCTTAGGCACAGCTCTAAGCCTCCTTATTCGAGCCGAGCTGGGCCAGCCAGGCAACCTTCTAGG  
TAACGACCACATCTACAACGTTATCGTACAGCCCATGCA  
TTTGTAATAATCTTCTTATAGTAATACCCATCATAATCGGAGGCTTTGGCAACTGACTAGTTCCCCTAATAATCGGTGC  
CCCCGATATGGCGTTTCCCCGCATAAACAACATAAGCTTC  
TGACTCTTACCTCCCTCTCTCCTACTCCTGCTCGCATCTGCTATAGTGGAGGCCGAGCAGGAACAGGTTGAACAGTCTA  
CCCTCCCTTAGCAGGGAACACTCCCACCCTGGAGCCTCC  
GTAGACCTAACCATCTTCTCCTTACACCTAGCAGGTGTCTCCTCTATCTTAGGGGCCATCAATTTTATCACAACAATTAT  
CAATATAAAACCCCTGCCATAACCCAATACCAAACGCC  
CTCTTCGTCTGATCCGTCTAATCACAGCAGTCTACTTCTCCTATCTCTCCAGTCTTAGCTGCTGGCATCACTATACT  
ACTAACAGACCGCAACCTCAACACCACCTTCTTCGACCCC  
GCCGGAGGAGGAGACCCATTCTATACCAACACCTATTCTGATTTTTTCGGTCACCCTGAAGTTTATATTCTTATCCTACC  
AGGCTTCGGAATAATCTCCCATATTGTAACCTTACTACTCC  
GGAAAAAAGAACCATTTGGATACATAGGTATGGTCTGAGCTATGATATCAATTGGCTTCTTAGGTTTTATCGTGTGAGC  
ACACCATATATTTACAGTAGGAATAGACGTAGACACACGA  
GCATATTTACCTCCGCTACCATAATCATCGCTATCCCCACCGCGTCAAAGTATTTAGCTGACTCGCCACACTCCACGG  
AAGCAATATGAAATGATCTGCTGCAGTGCTCTGAGCCCTA  
GGATTCATCTTTCTTTTACCCTAGGTGGCCTGACTGGCATTGTATTAGCAAACCTCATCACTAGACATCGTACTACACGA  
CACGTACTACGTTGTAGCTCACTTCCACTATGTCCTATCA  
ATAGGAGCTGTATTTGCCATCATAGGAGGCTTCACTTCACTGATTTCCCCTATTCTCAGGCTACACCCTAGACCAAACCTA  
CGCCAAAATCCATTTCACTATCATATTCATCGGCCTAAAT  
CTAACTTTCTTCCCACAACACTTTCTCGGCCTATCCGGAATGCCCCGACGTTACTCGGACTACCCCGATGCATACACCAC  
ATGAAACATCCTATCATCTGTAGGCTCATTCACTTCTCTA  
ACAGCAGTAATATTAATAATTTTTCATGATTTGAGAAGCCTTCGCTTGAAGCGAAAAGTCTAATAGTAGAAGAACCCTC  
CATAAACCTGGAGTGACTATATGGATGCCCCCACCCTAC  
CACACATTCGAAGAACCCGTATACATAAAATCTAGACAAAAAGGAAGGAATCGAACCCCCCAAAGCTGGTTTTCAAGCCA  
ACCCCATGGCCTCCATGACTTTTTTCAAAAAGGTATTAGAA  
AAACCATTTTATAACTTTGTCAAAGTTAAATTATAGGCTAAATCCTATATATCTTAATGGCACATGCAGCGCAAGTAGGT  
CTACAAGACGCTACTTCCCCTATCATAGAAGAGCTTATCA  
CCTTTTATGATCACGCCCTCATAATCATTTTTCTTATCTGCTTCTTAGTCTGTATGCCCTTTTCTTAACACTCACAACA  
AAACTAATAACTAATACTACTCAGACGCTCAGGAAATAG

AAACCGTCTGAACTATCCTGCCCCGCCATCATCCTAGTCCTCATCGCCCTCCCATCCCTACGCATCCTTTACATAACAGAC  
GAGGTCAACGATCCCTCCCTTACCATCAAATCAATTGGCC  
ACCAATGGTACTGAACCTACGAGTACACCGACTACGGCGGACTAATCTTCAACTCCTACATACTTCCCCATTATTCTTA  
GAACCAGGCGACCTGCGACTCCTTGACGTTGACAATCGAG  
TAGTACTCCCGATTGAAGCCCCCATTTCGTATAATAATTACATCACAAGACGTCTTGCCTCATGAGCTGTCCCCACATTA  
GGCTTAAAAACAGATGCAATTCCTCGGACGTCTAAACAAA  
CCACTTTACCGCTACACGACCGGGGTATACTACGGTCAATGCTCTGAAATCTGTGGAGCAAACCACAGTTTCATGCC  
ATCGTCTAGAATTAATTCCTTAAAAATCTTTGAAATAG  
GGCCCGTATTTACCCTATAGCACCCCTCTACCCCTCTAGAGCCACTGTAAAGCTAACTTAGCATTAACTTTTAAGT  
TAAAGATTAAGAGAACCAACACCTCTTTACAGTGAAATG  
CCCAACTAAATACTACCGTATGGCCACCATAATTACCCCTACTCCTTACACTATTCTCATCACCCAATAAAAATA  
TTAAACACAAACTACCACCTACCTCCCTCACCAAGCCCA  
TAAAAATAAAAAATTATAACAAACCCTGAGAACCAAAATGAACGAAAATCTGTTGCTTCATTATTGCCCCACAAATCC  
TAGGCCTACCCGCGCAGTACTGATCATTCTATTTCCCC  
TCTATTGATCCCCACCTCCAAATATCTCATCAACAACCGACTAATCACCACCAACAATGACTAATCAAATAACCTCAA  
AACAAATGATAACCATAACAACTAAAGGACGAACCTG  
ATCTCTTATACTAGTATCCTTAATCATTTTTTATTGCCACAATAACCTCCTCGGACTCCTGCCTCACTCATTTACACCA  
CCACCCAATCTATAAACCTAGCCATGGCCATCCCCTT  
ATGAGCGGGCGCAGTGATTATAGGCTTTGCTCTAAGATTAATAATGCCCTAGCCACTTCTTACCACAAGGCACACCTA  
CACCCCTTATCCCATACTAGTTATTATCGAAACCATCAG  
CCTACTCATTCAACCAATAGCCCTGGCCGTACGCCTAACCGCTAACATTACTGCAGGCCACCTACTCATGCACCTAATTG  
GAAGCGCCACCCTAGCAATATCAACCATTAACCTTCCCTC  
TACACTTATCATCTTACAATTCTAATTCTACTGACTATCCTAGAAATCGCTGTGCGCTTAATCCAAGCCTACGTTTTCA  
CACTTCTAGTAAGCCTCTACCTGCACGACAACACATAATG  
ACCCACCAATCACATGCCTATCATATAGTAAACCCAGCCCATGACCCCTAACAGGGGCCCTCTCAGCCCTCCTAATGAC  
CTCCGGCCTAGCCATGTGATTTCACTTCCACTCCATAACG  
CTCCTCATACTAGGCCTACTAACCAACACACTAACCATATACCAATGATGGCGCGATGTAACACGAGAAAGCACATACCA  
AGGCCACCACACACCACCTGTCCAAAAAGGCCTTCGATAC  
GGGATAATCCTATTTTATTACCTCAGAAGTTTTTTTTCTTGCAGGATTTTTTCTGAGCCTTTTACCCTCCAGCCTAGCCCC  
TACCCCAATTAGGAGGGCACTGGCCCAACAGGCATC  
ACCCCGCTAAATCCCCTAGAAGTCCCACTCCTAAACACATCCGTATTACTCGCATCAGGAGTATCAATCACCTGAGCTCA  
CCATAGTCTAATAGAAAACAACCGAAACCAATAATTCAA  
GCACTGCTTATTACAATTTTACTGGGTCTCTATTTTACCCTCCTACAAGCCTCAGAGTACTTTCAGTCTCCCTTACCAT  
TTCCGACGGCATCTACGGCTCAACATTTTTTTGTAGCCACA  
GGCTTCCACGGACTTCACGTCAATTATTGGCTCAACTTTTCTCACTATCTGCTTCATCCGCCAACTAATATTTCACTTTAC  
ATCCAAACATCACTTTGGCTTCGAAGCCGCCGCTGATAC  
TGGCATTGTTGTAGATGTGGTTTACTATTTCTGTATGTCTCCATCTATTGATGAGGGTCTTACTCTTTTAGTATAAATAG  
TACCGTTAACTTCCAATTAAGTATTTTGGACAACATTCAA  
AAAAGAGTAATAAACTTCGCCTTAATTTTAATAATCAACACCCTCCTAGCCTTACTACTAATAATTATTACATTTTACT  
ACCACAATCAACGGCTACATAGAAAATCCACCCCTTAC  
GAGTGCAGGCTTCGACCCTATATCCCCCGCCGCGTCCCTTTCTCCATAAAATTTCTTCTTAGTAGCTATTACCTTCTTATT  
ATTTGATCTAGAAATTGCCCTCCTTTTACCCTTACCATGA  
GCCCTACAAACAATAACCTGCCACTAATAGTTATGTCATCCCTCTTATTAATCATCATCCTAGCCCTAAGTCTGGCCTA  
TGAGTGACTACAAAAGGATTAGACTGAACCGAATTGGTA  
TATAGTTTAAACAAAACGAATGATTTGACTCATTAAATTATGATAATCATATTTACCAAATGCCCTCATTACATAAA  
TATTATACTAGCATTTACCATCTCACTTCTAGGAATACTA  
GTATATCGCTCACACCTCATATCCTCCCTACTATGCCTAGAAGGAATAATACTATCGCTGTTTATTATAGCTACTCTCAT  
AACCTCAACACCCACTCCCTCTTAGCCAATATTGTGCCT  
ATTGCCATACTAGTCTTTGCCGCTGCGAAGCAGCGGTGGGCTAGCCCTACTAGTCTCAATCTCCAACACATATGGCCT  
AGACTACGTACATAACCTAAACCTACTCCAATGCTAAAAC  
TAATCGTCCCAACAATTATATTACTACCCTGACATGACTTTCCAAAAACACATAATTTGAATCAACACAACCACCCAC  
AGCCTAATTATTAGCATCATCCCTCTACTATTTTTTTAACC  
AAATTAACAACAACCTATTTAGCTGTTCCCAACCTTTTCTCCGACCCCTAACAAACCCCTCCTAATACTAATACTACC  
TGACTCCTACCCCTCACAAATCATGGCAAGCCAACGCCACT  
TATCCAGTGAACCACTATCACGAAAAAACTCTACCTCTCTATACTAATCTCCCTACAAATCTCCTTAATTATAACATTC  
ACAGCCACAGAATAATCATATTTTTATATCTTCTTCGAAA

CCACACTTATCCCCACCTTGGCTATCATCACCCGATGAGGCAACCAGCCAGAACGCCTGAACGCAGGCACATACTTCCTA  
TTCTACACCCTAGTAGGCTCCCTTCCCCTACTCATCGCAC  
TAATTTACACTCACAACACCCTAGGCTCACTAAACATTCTACTACTACTCTACTGCCCCAAGAACTATCAAACCTCTGA  
GCCAACAACTTAATATGACTAGCTTACACAATAGCTTTTA  
TAGTAAAGATACCTCTTTACGGACTCCACTTATGACTCCCTAAAGCCCATGTGGAAGCCCCATCGCTGGGTCAATAGTA  
CTTGCCCGAGTACTCTTAAACTAGGCGGCTATGGTATAA  
TACGCCTCACACTCATTCTCAACCCCTGACAAAACACATAGCCTACCCCTTCCCTGTACTATCCCTATGAGGCATAATT  
ATAACAAGCTCCATCTGCCTACGACAAAACAGACCTAAAAT  
CGCTCATTGCATACTCTTCAATCAGCCACATAGCCCTCGTAGTAACAGCCATTCTCATCCAAACCCCTGAAGCTTCACC  
GGCGCAGTCACTCTCATAATCGCCCACGGGCTTACATCCT  
CATTACTATTCTGCCTAGCAAACCTCAAACCTACGAACGCATCACAGTTCGCATCATAATCCTCTCTCAAGGACTTCAAAC  
CTACTCCCCTAATAGCTTTTTGATGACTTCTAGCAAGCC  
TCGCTAACCTCGCCTTACCCCTACTATTAACCTACTGGGAGAAGCTCTCTGTGCTAGTAACCACGTTCTCCTGATCAAAT  
ATCACTCTCCTACTTACAGGACTCAACATACTAGTCACAG  
CCCTATACTCCCTCTACATATTTACCACAACACAATGGGGCTCACTCACCCACCACATTAACAACATAAAAACCCCTCATT  
ACACGAGAAAACACCCTCATGTTTACACCTATCCCCCA  
TTCTCCTCTATCCCTCAACCCCGACATCATTACCGGGTTTTCTCTGTAAATATAGTTTTAACAAAACATCAGATTGT  
GAATCTGACAACAGAGGCTTACGACCCCTTATTTACCGAG  
AAAGCTCACAAGAAGTCTAACTCATGCCCCATGTCTAACAACATGGCTTTCTCAACTTTTTAAAGGATAACAGCTATCC  
ATTGGTCTTAGGCCCCAAAATTTTTGGTGCAACTCCAAAT  
AAAAGTAATAACCATGCACACTACTATAACCACCCTAACCTGACTTCCCTAATTCCCCCATCCTTACCACCCTCGTTA  
ACCCTAACAAAAAAACTCATACCCCTATTATGTAAAATC  
CATTGTGCATCCACCTTTATTATCAGTCTCTTCCCCACAACAATATTCATGTGCCTAGACCAAGAAGTTATTATCTCGA  
ACTGACACTGAGCCACAACCCAAACAACCCAGCTCTCCCT  
AAGCTTCAAACCTAGACTACTTCTCCATAATATTCATCCCTGTAGCATTGTTGTTACATGGTCCACCATAGAATTCTCAC  
TGTGATATATAAACTCAGACCCAAACATTAATCAGTTCTT  
CAAATATCTACTCATCTTCCCTAATTACCATACTAATCTTAGTTACCGCTAACAACTATTCCAACCTGTTTATCGGCTGAG  
AGGGCGTAGGAATTATATCCTTCTTGTCTCATCAGTTGATG  
ATACGCCCGAGCAGATGCCAACACAGCAGCCATTCAAGCAATCCTATACAACCGTATCGGCGATATCGGTTTTATCCTCG  
CCTTAGCATGATTTATCCTACACTCCAACCTCATGAGACCC  
ACAACAAATAGCCCTTCTAAACGCTAATCCAAGCCTCACCCACTACTAGGCCCTCCTCCTAGCAGCAGCAGGCAAATCAG  
CCCAATTAGGTCTCCACCCTGACTCCCCTCAGCCATAGA  
AGGCCCCACCCAGTCTCAGCCCTACTCCACTCAAGCACTATAGTTGTAGCAGGAATCTTCTTACTCATCCGCTTCCACC  
CCCTAGCAGAAAATAGCCCACTAATCCAAACTCTAACACT  
ATGCTTAGGCGCTATCACCCTCTGTTGCGCAGCAGTCTGCGCCCTTACACAAAATGACATCAAAAAAATCGTAGCCTTCT  
CCACTTCAAGTCAACTAGGACTCATAATAGTTACAATCGG  
CATCAACCAACCACACCTAGCATTCTGCACATCTGTACCCACGCCTTCTTCAAAGCCATACTATTTATGTGCTCCGGGT  
CCATCATCCACAACCTTAACAATGAACAAGATATTCGAAA  
AATAGGAGGACTACTCAAACCATACCTCTCACTTCAACCTCCCTCACCATTTGGCAGCCTAGCATTAGCAGGAATACCTT  
TCCTCACAGTTTTCTACTCCAAAGACCACATCATCGAAAAC  
CGCAAACATATCATAACAAACGCCTGAGCCCTATCTATTACTCTCATCGCTACCTCCCTGACAAGCGCCTATAGCACTC  
GAATAATTCTTCTCACCCCTAACAGGTCAACCTCGCTTCCC  
CACCCCTACTAACATTAACGAAAATAACCCACCCCTACTAAACCCCATTAACGCCTGGCAGCCGGAAGCCTATTTCGCAG  
GATTTCTCATTACTAACAACATTTCCCCCGCATCCCCCTT  
CCAAACAACAATCCCCCTTACCTAAAACCTCACAGCCCTCGCTGTCACTTTCTTAGGACTTCTAACAGCCCTAGACCTCA  
ACTACCTAACCAACAACCTTAAAATAAAAATCCCCACTATG  
CACATTTTATTTCTCAACATACTCGGATTTACCCCTAGCATCACACACCCGCACAATCCCTTATCTAGGCCCTTCTTACGA  
GCCAAAACCTGCCCCCTACTCCTCCTAGACCTAACCTGACT  
AGAAAAGCTATTACCTAAAACAATTTTACAGCACCAAATCTCCACCTCCATCATCACCTCAACCCAAAAAGGCATAATTA  
AACTTTACTTCTCTCTTTCTTCTTCCACTCATCCTAAC  
CCTACTCCTAATCACATAACCTATTCCCCGAGCAATCTCAATTACAATATATACACCAACAACAATGTTCAACCAGTA  
ACTACTACTAATCAACGCCATAATCATAACAAGCCCCCG  
CACCAATAGGATCCTCCCGAATCAACCCTGACCCCTCTCCTTACATAAATTATTAGCTTCTTACACTATTAAGTTTTACC  
ACAACCACCACCCCATCATACTCTTTTACCCACAGCACCA  
ATCCTACCTCCATCGCTAACCCCACTAAAACACTCACCAAGACCTCAACCCCTGACCCCATGCCTCAGGATACTCCTCA  
ATAGCCATCGCTGTAGTATATCCAAGACAACCATCATT

CCCCTAAATAAATTAAAAAAATTTAAACCCATATAACCTCCCCAAAATTTCAGAATAATAACACACCCGACCACACCG  
CTAACAAATCAATACTAAACCCCATAAATAGGAGAAGGCT  
TAGAAGAAAACCCCAAAACCCCATTAATAACCCCACTCAACAGAAACAAAGCATAACATCATTATTCTCGCACGGACT  
ACAACCACGACCAATGATATGAAAAACCATCGTTGTATTT  
CAACTACAAGAACACCAATGACCCCAATACGCAAACTAACCCCTAATAAAATTAATTAACCACTCATTTCATCGACCTC  
CCCACCCCATCCAACATCTCCGCATGATGAACTTCGGCT  
CACTCCTTGGCGCCTGCCTGATCCTCCAAATCACCACAGGACTATTCTAGCCATGCACTACTCACCAGACGCCTCAACC  
GCCTTTTCATCAATCGCCACATCACTCGAGACGTAAATT  
ATGGCTGAATCATCCGCTACCTTCACGCCAATGGCGCCTCAATATTCTTTATCTGCCTCTTCTACACATCGGGCGAGGC  
CTATATTACGGATCATTCTCTACTCAGAAACCTGAAACA  
TCGGCATTATCCTCTGCTTGAACATAGCAACAGCCTTCATAGGCTATGTCTCCCGTGAGGCCAAATATCATTCTGA  
GGGGCCACAGTAATTACAACTTACTATCCGCCATCCCAT  
ACATTGGGACAGACTAGTTCAATGAATCTGAGGAGGCTACTCAGTAGACAGTCCCACCCTCACACGATTCTTTACCTTT  
CACTTCATCTTGCCTTTCATTATTGCAGCCCTAGCAGCAC  
TCCACCTCCTATTCTTGCACGAAACGGGATCAAACAACCCCTAGGAATCACCTCCCATTCCGATAAAATCACCTTCCAC  
CCTTACTACACAATCAAAGACGCCCTCGGCTTACTTCTCT  
TCCTTCTCTCCTTAATGACATTAACACTATTCTCACCAGACCTCCTAGGCGACCCAGACAATTATACCCTAGCCAACCC  
TTAAACACCCCTCCCCACATCAAGCCCGAATGATATTTCC  
TATTGCCTACACAATTCTCCGATCCGTCCCTAACAACTAGGAGGCGTCTTGCCTATTACTATCCATCCTCATCCTA  
GCAATAATCCCCATCCTCCATATATCCAAACAACAAGCA  
TAATATTTTCGCCACTAAGCCAATCACTTTATTGACTCCTAGCCGAGACCTCCTCATTCTAACCTGAATCGGAGGACAA  
CCAGTAAGCTACCCTTTTACCATCATTGGACAAGTAGCAT  
CCGTACTATACTTCAACAATCCTAATCCTAATACCAACTATCTCCCTAATTGAAAACAAAATACTCAAATGGGCCTGT  
CCTTGTAGTATAAACTAATACACCAGTCTTGTAAACCGGA  
GATGAAAACCTTTTTCCAAGGACAAATCAGAGAAAAAGTCTTTAACTCCACCATTAGCACCCAAAGCTAAGATTCTAATT  
TAAACTATT

#EUROPE French

CCACAGTTTATGTAGCTTACCTCCTCAAAGCAATACACTGAAAATGTTTGTAGACGGGCTCACATCACCCCATAAACAATA  
GGTTTGGTCTAGCCTTTCTATTAGCCCTTAGTAAGATTA  
CACATGCAAGCATCCCCGTTCCAGTGAGTTCCACCTCTAAATCACCACGATCAAAGGGACAAGCATCAAGCACGCAGCA  
ATGCAGCTCAAACGCTTAGCCTAGCCACACCCCCACGGG  
AAACAGCAGTGATTAACCTTTAGCAATAAACGAAAGTTTAACTAAGCTATACTAACCCAGGGTTGGTCAATTTTCGTGCC  
AGCCACCGCGGTACACGATTAACCCAAGTCAATAGAAGC  
CGGCGTAAAGAGTGTTTTATAGATCACCCCTCCCCAATAAAGCTAAAACCTCACCTGAGTTGTAAAAAACTCCAGTTGACAC  
AAAATAGACTACGAAAGTGGCTTTAACATATCTGAACACA  
CAATAGCTAAGACCCAACTGGGATTAGATACCCCACTATGCTTAGCCCTAAACCTCAACAGTTAAATCAACAAAACCTGC  
TCGCCAGAACACTACGAGCCACAGCTTAAAACCTCAAAGGA  
CCTGGCGGTGCTTCATATCCCTCTAGAGGAGCCTGTTCTGTAATCGATAAACCCCGATCAACCTCACACCTCTTGCTCA  
GCCTATATACCGCCATCTTCAGCAAACCTGATGAAGGCT  
ACAAAGTAAGCGCAAGTACCCACGTAAAGACGTTAGGTCAAGGTGTAGCCCATGAGGTGGCAAGAAATGGGCTACATTTT  
CTACCCCAAGAACTACGATAGCCCTTATGAACTTAAGG  
GTGCAAGGTGGATTTAGCAGTAACTGAGAGTAGAGTGCTTAGTTGAACAGGGCCCTGAAGCGCGTACACACCCGCCGTC  
ACCCTCCTCAAGTATACTTCAAAGGACATTTAACTAAAAC  
CCCTACGCATTTATATAGAGGAGACAAGTCGTAACATGGTAAGTGTACTGGAAAGTGCCTTGGACGAACCAGAGTGTAG  
CTTAACACAAAGCACCCAACTTACACTTAGGAGATTTCAA  
CTTAACCTTGACCGCTCTGAGCTAAACCTAGCCCCAAACCCACTCCACCTTACTACCAGACAACCTTAGCCAAACCATTTA  
CCCCAATAAAGTATAGGCGATAGAAATTGAAACCTGGCGC  
AATAGATATAGTACCGCAAGGGAAAGATGAAAAATTATAACCAAGCATAATATAGCAAGGACTAACCCCTATACCTTCTG  
CATAATGAATTAATACTAGAAATAACTTTGCAAGGAGAGCCA  
AAGCTAAGACCCCCGAAACCAGACGAGCTACCTAAGAACAGCTAAAAGAGCACACCCCGTCTATGTAGCAAAATAGTGGGA  
AGATTTATAGGTAGAGGCGACAAACCTACCGAGCCTGGTG  
ATAGCTGGTTGTCCAAGATAGAATCTTAGTTCAACTTTAAATTTGCCACAGAACCCTCTAAATCCCCTTGTAATTTAA  
CTGTTAGTCCAAAGAGGAACAGCTCTTTGGACACTAGGAA  
AAAACCTTGTAGAGAGAGTAAAAAA-  
TTTAACACCCATAGTAGGCCTAAAAGCAGCCACCAATTAAGAAAGCGTTCAAGCTCAACACCCACTACCTAAAAAA-  
TCCCAACATATAACTG

AACTCCTCACACCCAATTGGACCAATCTATCACCTATAGAAGAACTAATGTTAGTATAAGTAACATGAAAACATTCTCC  
TCCGCATAAGCCTGCGTCAGATTAACAACTGAAGTACA  
ATTAACAGCCCAATATCTACAATCAACCAACAAGTCATTATTACCCTCACTGTCAACCCAACACAGGCATGCTCATAAGG  
AAAGGTTAAAAAAGTAAAAGGAACTCGGCAAATCTTACC  
CCGCCTGTTTACCAAAAACATCACCTCTAGCATCACCAGTATTAGAGGCACCGCCTGCCAGTGACACATGTTTAACGGC  
CGCGGTACCCTAACCGTGCAAAGGTAGCATAATCACTTGT  
TCCTTAAATAGGGACCTGTATGAATGGCTCCACGAGGGTTCAGCTGTCTCTTACTTTTAACCAGTGAAATTGACCTGCC  
GTGAAGAGGCGGGCATAACACAGCAAGACGAGAAGACCCT  
ATGGAGCTTTAATTTATTAATGCAAACAGTACCTAACAAACCCACAGGTCTAAACTACCAAACCTGCATTAATAAATTTCC  
GGTTGGGGCGACCTCGGAGCAGAACCCAACCTCCGAGCAG  
TACATGCTAAGACTTCACCACTCAAAGCGAATCTATACTCAATTGATCCAATAACTTGACCAACGGAACAAGTTACCC  
TAGGGATAACAGCGCAATCTTATTCTAGAGTCCATATCAA  
CAATAGGTTTTACGACCTCGATGTTGGATCAGGACATCCCAATGGTGCAGCCGCTATTAAAGGTTGTTTTGTTCAACGAT  
TAAAGTCTACGTGATCTGAGTTCAGACCGGAGTAATCCA  
GGTCGGTTTTCTATCTACTTCAAATTCCTCCCTGTACGAAAGGACAAGAGAAATAAGGCCTACTTCACAAAGCGCCTTCCC  
CCGTAAATGATATCATCTCAACTTAGTATTATACCCACAC  
CCACCCAAGAACAGGGTTTTGTTAAGATGGCAGAGCCCGGTAATCGCATAAACTTAAACTTTACAGTCAGAGGTTCAAT  
TCCTCTTCTTAAACAACATACCCATGGCCAACCTCCTACTC  
CTCATTGTACCCATTCTAATCGCAATGGCATTCTAATGCTTACCGAACGAAAAATTCTAGGCTATATACAACCTACGCAA  
AGGCCCAACGTTGTAGGCCCTACGGGCTACTACAACCC  
TTCGCTGACGCCATAAACTCTTACCAAAGAGCCCTAAAACCCGCCACATCTACCATCACCTCTACATCACCGCCCC  
GACCTTAGCTCTCACCATCGCTCTTCTACTATGAACCCCC  
CTCCCCATACCCAACCCCTGGTCAACCTCAACCTAGGCCTCCTATTTATTCTAGCCACCTCTAGCCTAGCCGTTTACTC  
AATCCTCTGATCAGGGTGAGCATCAAACCTCAAACCTACGCC  
CTGATCGGGCGACTGCGAGCAGTAGCCCAAACAATCTCATATGAAGTCACCCTAGCCATCATTCTACTATCAACATTACT  
AATAAGTGGCTCCTTTAACCTCTCCACCCTTATCACAACA  
CAAGAACACCTCTGATTACTCCTGCCATCATGACCTTGGCCATAATATGATTTATCTCCACACTAGCAGAGACCAACCG  
AACCCCTTCGACCTTGCAGGAGGGGAGTCCGAACACTAG  
TCAGGCTTCAACATCGAATACGCCCGAGGCCCTTCCGCTATTCTTTCATAGCCGAATACACAAACATTATTATAATAAA  
CACCTCACACTACAATCTTCTAGGAACAACATATGAC  
GCACTCTCCCCTGAACTCTACACAACATATTTTTGTACCAAGACCCTACTTCTAACCTCCCTGTTCTTATGAATTGAAAC  
AGCATAACCCCGATTCCGCTACGACCAACTCATAACCTC  
CTATGAAAAAATTCCTACCCTCACCTTAGCATTACTTATATGATATGTCTCCATACCCATTACAATCTCCAGCATTCC  
CCCTCAAACCTAAGAAATATGTCTGATAAAAGAGTTACTT  
TGATAGAGTAAATAATAGGAGCTTAAACCCCTTATTTCTAGGACTATGAGAATCGAACCCATCCCTGAGAATCCAAAAT  
TCTCCGTGCCACCTATCACACCCCATCCTAAAGTAAGGTC  
AGCTAAATAAGCTATCGGGCCATACCCCGAAAATGTTGGTTATACCCCTCCCGTACTAATTAATCCCTGGCCCAACCC  
GTCATCTACTCTACCATCTTTGCAGGCACACTCATCACAG  
CGCTAAGCTCGCACTGATTTTTTACCTGAGTAGGCCTAGAAATAAACATGCTAGCTTTTTATTCCAGTTCTAACCAAAAA  
ATAAACCTCGTTCCACAGAAGCTGCCATCAAGTATTTCC  
TCACGCAAGCAACCGCATCCATAATCCTTCTAATAGCTATCCTCTTCAACAATATACTCTCCGGACAATGAACCATAACC  
AATACTACCAATCAATACTCATCATTAATAATCATAATGG  
CTATAGCAATAAACTAGGAATAGCCCCCTTCACTTCTGAGTCCCAGAGGTTACCCAAGGCACCCCTCTGACATCCGGC  
CTGCTTCTTCTCACATGACAAAAACTAGCCCCCATCTCAA  
TCATATAACCAATCTCTCCCTCACTAAACGTAAGCCTTCTCCTCACTCTCTCAATCTTATCCATCATAGCAGGCAGTTGA  
GGTGGATTAACCAACCCAGCTACGCAAAATCTTAGCAT  
ACTCCTCAATTACCCACATAGGATGAATAATAGCAGTTCTACCGTACAACCCTAACATAACCATTCTTAATTTAACTATT  
TATATTATCCTAATACTACTACCGCATTCTACTACTCAACT  
TAAACTCCAGCACCACGACCCTACTACTATCTCGCACCTGAAACAAGCTAACATGACTAACACCCTTAATTCCATCCACC  
CTCCTCTCCCTAGGAGGCCTGCCCCGCTAACCGGCTTTT  
TGCCCAAATGGGCCATTATCGAAGAATTCACAAAAACAATAGCCTCATCATCCCCACCATCATAGCCACCATCACCCCTC  
CTTAACCTCTACTTCTACCTACGCCTAATCTACTCCACCT  
CAATCACACTACTCCCATATCTAACAACGTAATAAATAAATGACAGTTTTGAACATACAAAACCCACCCCATCTCCCC  
ACACTCATCGCCCTTACCACGCTACTCCTACCTATCTCCC  
CTTTTATACTAATAATCTTATAGAAATTTAGGTTAAATACAGACCAAGAGCCTTCAAAGCCCTCAGTAAGTTGCAATACT  
TAATTTCTGTAACAGCTAAGGACTGCAAAACCCACTCTG

CATCAACTGAACGCAAATCAGCCACTTTAATTAAGCTAAGCCCTTACTAGACCAATGGGACTTAAACCCACAAACTTA  
GTTAACAGCTAAGCACCCCTAATCAACTGGCTTCAATCTAC  
TTCTCCC GCCCGGGAAAAAAGGCGGGAGAAGCCCCGGCAGGTTTGAAGCTGCTTCTTGAATTTGCAATTTCAATATGA  
AAATCACCTCGGAGCTGGTAAAAAGAGGCCTAACCCCTGT  
CTTTAGATTTACAGTCCAATGCTTCACTCAGCCATTTTACCTCACCCCC-  
ACTGATGTTTCGCCGACCGTTGACTATTCTCTACAAACCACAAAGACATTGGAACACTATACTATTATTC  
GGCGCATGAGCTGGAGTCTTAGGCACAGCTCTAAGCCTCCTTATTTCGAGCCGAGCTGGGCCAGCCAGGCAACCTTCTAGG  
TAACGACCACATCTACAACGTTATCGTCCAGCCCATGCA  
TTTGTAAATAATCTTCTTCATAGTAATACCCATCATAATCGGAGGCTTTGGCAACTGACTAGTTCCCCTAATAATCGGTGC  
CCCCGATATGGCGTTTCCCCGCATAAAACAATAAGCTTC  
TGACTCTTACCTCCCTCTCTCTACTCTCTGCTGCATCTGCTATAGTGGAGGCCGGAGCAGGAACAGGTTGAACAGTCTA  
CCCTCCCTTAGCAGGGAATACTCCACCCTGGAGCCTC  
GTAGACCTAACCATCTTCTCTTACACCTAGCAGGTGTCTCCTCTATCTTAGGGGCCATCAATTTTATCACAACAATTAT  
CAATATAAAACCCCTGCCATAACCCAATACCAAACGCC  
CTCTTCGTCTGATCCGTCTAATCACAGCAGTCTACTTCTCTCTATCTCTCCAGTCTTAGCTGCTGGCATCACTATACT  
ACTAACAGACCGCAACCTCAACACCACCTTCTTCGACCCC  
GCCGGAGGAGGAGACCCATTCTATACCAACACCTATTCTGATTTTTTCGGTCCACCCTGAAGTTTATATTCTTATCCTACC  
AGGCTTCGGAATAATCTCCCATATTGTAACCTTACTACTCC  
GGAAAAAAGAACCATTTGGATACATAGGTATGGTCTGAGCTATGATATCAATTGGCTTCTTAGGGTTTTATCGTGTGAGC  
ACACCATATATTTACAGTAGGAATAGACGTAGACACACGA  
GCATATTTACCTCCGCTACCATAATCATCGCTATCCCCACCGCGTCAAAGTATTTAGCTGACTCGCCACACTCCACGG  
AAGCAATATGAAATGATCTGCTGCAGTGTCTGAGCCCTA  
GGATTCATCTTTCTTTTACCCTAGGTGGCCTGACTGGCATTGTATTAGCAAACCTCATCACTAGACATCGTACTACACGA  
CACGTACTACGTTGTAGCCCACTTCCACTATGTCTTATCA  
ATAGGAGCTGTATTTGCCATCATAGGAGGCTTCATTCCTGATTTCCCTATTCTCAGGCTACACCCTAGACCAAACCTA  
CGCCAAAATCCATTTCACTATCATATTCATCGGCGTAAAT  
CTAACTTTCTTCCCAACACTTTCTCGGCCTATCCGGAATGCCCCGACGTTACTCGGACTACCCCGATGCATACACCAC  
ATGAAACCTCTATCATCTGTAGGCTCATTCACTTTCTCTA  
ACAGCAGTAATATTAATAATTTTTCATGATTTGAGAAGCCTTCGCTTGAAGCGAAAAGTCTAATAGTAGAAGAACCCTC  
CATAAACCTGGAGTACTATATGGATGCCCCCACCCTAC  
CACACATTCGAAGAACCCTGATACATAAAATCTAGACAAAAAAGGAAGGAATCGAACCCCCCAAAGCTGGTTTTCAAGCCA  
ACCCCATGGCCTCCATGACTTTTTTCAAAAAGGTATTAGAA  
AAACCATTTTATAACTTTGTCAAAGTTAAATTATAGGCTAAATCCTATATATCTTAATGGCACATGCAGCGCAAGTAGGT  
CTACAAGACGCTACTTCCCCTATCATAGAAGAGCTTATCA  
CCTTTTCATGATCACGCCCTCATAATCATTTTCTTATCTGCTTCTTAGTCTGTATGCCCTTTTTCTAACACTCACAACA  
AACTAACTAATACTAATCATCTCAGACGCTCAGGAAATAG  
AAACCGTCTGAACTATCCTGCCCGCCATCATCTAGTCTCATCGCCCTCCCATCCCTACGCATCCTTTACATAACAGAC  
GAGGTCAACGATCCCTCCCTTACCATCAAATCAATTGGCC  
ACCAATGGTACTGAACTACGAGTACACCGACTACGGCGGACTAATCTTCAACTCCTACATACTTCCCCATTATTCTTA  
GAACCAGGCGACCTGCGACTCCTTGACGTTGACAATCGAG  
TAGTACTCCCGATTGAAGCCCCCATTTCGTATAATAATTACATCACAAGACGTCTTGCCTCATGAGCTGTCCCCACATTA  
GGCTTAAAAACAGATGCAATTTCCCGGACGTCTAAACCAA  
CCACTTTACCCTACACGACCGGGGTATACTACGGTCAATGCTCTGAAATCTGTGGAGCAAACCACAGTTTTCATGCC  
ATCGTCTTAGAATTAATTTCCCTAAAAATCTTTGAAATAG  
GGCCCGTATTTACCCTATAGCACCCCTCTACCCCTCTAGAGCCACTGTAAAGCTAACTTAGCATTAACTTTTAAAGT  
TAAAGATTAAGAGAACCAACACCTCTTTACAGTGAATGC  
CCCAACTAAATACTACCGTATGGCCACCATAAATTACCCCTACTCCTTACACTATTCTCATACCCCACTAAAAATA  
TTAAACACAACTACCACCTACCTCCCTCACCAAAGCCCA  
TAAAAATAAAAAATTATAACAAACCCTGAGAACCAAAATGAACGAAAATCTGTTTCGCTTCATTATTGCCCCACAATCC  
TAGGCCTACCCGCGCAGTACTGATCATTCTATTTCCCC  
TCTATTGATCCCCACCTCCAAATATCTCATCAACAACCGACTAATCACCACCAACAATGACTAATCAAACCTAACCTCAA  
AACAAATGATAACCATAACAACTAAAGGACGAACCTG  
ATCTCTTATACTAGTATCCTTAATCATTTTTTATTGCCACAATAACCTCCTCGGACTCCTGCCTCACTCATTTTACACCAA  
CCACCCAACTATCTATAAACCTAGCCATGGCCATCCCCTT  
ATGAGCGGGCGAGTGATTATAGGCTTTTCGCTCTAAGATTAATAATGCCCTAGCCACTTCTTACCACAAGGCACACCTA  
CACCCCTTATCCCATACTAGTTATTATCGAAACCATCAG

CCTACTCATTCAACCAATAGCCCTGGCCGTACGCCTAACCGCTAACATTACTGCAGGCCACCTACTCATGCACCTAATTG  
GAAGCGCCACCCTAGCAATATCAACCATTAACCTTCCCTC  
TACTACTTATCATCTTCAACAATTCTAATTCTACTGACTATCCTAGAAATCGCTGTGCCTTAATCCAAGCCTACGTTTTCA  
CACTTCTAGTAAGCCTCTACCTGCACGACAACACATAATG  
ACCCACCAATCACATGCCTATCATATAGTAAAACCCAGCCCATGACCCCTAACAGGGGCCCTCTCAGCCCTCCTAATGAC  
CTCCGGCCTAGCCATGTGATTTCACTTCCACTCCATAACG  
CTCCTCATACTAGGCCTACTAACCAATACACTAACCATATACCAATGATGGCGCGATGTAACACGAGAAAGCACATACCA  
AGGCCACCACACACCACCTGTCCAAAAAGGCCTTCGATAC  
GGGATAATCCTATTTATTACCTCAGAAGTTTTTTTCTTCGCAGGATTTTTCTGAGCCTTTTACCCTCCAGCCTAGCCCC  
TACCCCCCAATTAGGAGGGCACTGGCCCCAACAGGCATC  
ACCCCGCTAAATCCCCTAGAAGTCCCCTCCTAAACACATCCGTATTACTCGCATCAGGAGTATCAATCACCTGAGCTCA  
CCATAGTCTAATAGAAAAACAACCGAAACCAATAATTCAA  
GCACTGCTTATTACAATTTTACTGGGTCTCTATTTTACCCTCCTACAAGCCTCAGAGTACTTTCGAGTCTCCCTTACCAT  
TTCCGACGGCATCTACGGCTCAACATTTTTTTGTAGCCACA  
GGCTTCCACGGACTTTCAGTCACTATTGGCTCAACTTTTCTCCTACTATCTGCTTTCATCCGCCAACTAATATTTCACTTTAC  
ATCCAAACATCACTTTGGCTTCGAAGCCGCGCCTGATAC  
TGGCATTGTTGTAGATGTGGTTTACTATTTCTGTATGTCTCCATCTATTGATGAGGGTCTTACTCTTTTAGTATAAATAG  
TACCGTTAACTTCCAATTAAGTATTTTGTAGCAACATTCAA  
AAAAGAGTAATAAACTTCGCCTTAATTTTAATAATCAACACCCTCCTAGCCTTACTACTAATAATTATTACATTTTACT  
ACCACAACCTCAACGGCTACATAGAAAAATCCACCCCTTAC  
GAGTGCAGGCTTCGACCCTATATCCCCCGCCGCGTCCCTTTCTCCATAAAATTCTTCTTAGTAGCTATTACCTTCTTATT  
ATTTGATCTAGAAATTGCCCTCCTTTTACCCTACCATGA  
GCCCTACAAACAACCTAACCTGCCACTAATAGTTATGTCATCCCTCTTATTAATCATCATCCTAGCCCTAAGTCTGGCCTA  
TGAGTGACTACAAAAAGGATTAGACTGAACCGAATTGGTA  
TATAGTTTAAACAAAACGAATGATTTTGCAGTCACTAAATTATGATAATCATATTTACCAAATGCCCTCATTACATAAA  
TATTATACTAGCATTACCATCTCACTTCTAGGAATACTA  
GTATATCGCTCACACCTCATATCCTCCCTACTATGCCTAGAAGGAATAATACTATCGCTGTTTATTATAGCTACTCTCAT  
AACCTCAACACCCACTCCCTCTTAGCCAATATTGTGCCT  
ATTGCCATACTAGTCTTTTCCCGCCTGCGAAGCAGCGGTGGGCCCTAGCCCTACTAGTCTCAATCTCCAACACATATGGCCT  
AGACTACGTACATAAACCTAACCTACTCCAATGCTAAAAC  
TAATCGTCCCAACAATTATATTACTACCCTGACATGACTTTCCAAAAACACATAATTTGAATCAACACAACCACCCAC  
AGCCTAATTATTAGCATCATCCCTCTACTATTTTTTAACC  
AAATCAACAACAACCTATTTAGCTGTTCCCAACCTTTTCTCCGACCCCTAACACCCCTCCTAATACTAATACTACC  
TGACTCCTACCCCTCACAATCATGGCAAGCCAACGCCACT  
TATCCAGTGAACCACTATCACGAAAAAACTCTACCTCTCTATACTAATCTCCCTACAAATCTCCTTAATTATAACATTC  
ACAGCCACAGAATAATCATATTTTATATCTTCTTCGAAA  
CCACACTTATCCCCACCTTGGCTATCATCACCCGATGAGGCAACCAGCCAGAACGCCTGAACGCAGGCACATACTTCCCTA  
TTCTACACCCTAGTAGGCTCCCTTCCCCTACTCATCGCAC  
TAATTTACTACTCACAACACCCTAGGCTCACTAAACATTCTACTACTCACTCTCACTGCCAAGAACTATCAAACCTCCTGA  
GCCAACAACCTAATATGACTAGCTTACACAATAGCTTTTA  
TAGTAAAGATACCTCTTTACGGACTCCACTTATGACTCCCTAAAGCCCATGTGCAAGCCCCATCGCTGGGTCAATAGTA  
CTTGCCGAGTACTCTTAAACTAGGCGGCTATGGTATAA  
TACGCCTCACACTCATTCTCAACCCCTGACAAAACACATAGCCTACCCCTTCCCTGTACTATCCCTATGAGGCATAATT  
ATAACAAGCTCCATCTGCCTACGACAAAACAGACCTAAAAT  
CGCTCATTGCATACTCTTCAATCAGCCACATAGCCCTCGTAGTAACAGCCATTCTCATCCAAACCCCTGAAGCTTACC  
GGCGCAGTCACTTCTATAATCGCCCACGGGCTTACATCCT  
CATTACTATTTGCCTAGCAAACCTCAAACCTACGAACGCCTCACAGTGCATCATAATCCTCTCTCAAGGACTTCAAACCT  
CTACTCCCCTAATAGCTTTTTTGTAGTACTTCTAGCAAGCC  
TCGCTAACCTCGCCTTACCCCTACTATTAACCTACTGGGAGAATCTCTGTGCTAGTAACCACGTTCTCCTGATCAAAT  
ATCACTCTCCTACTTACAGGACTCAACATACTAGTCAACG  
CCCTATACTCCCTCTACATATTTACCACAACACAATGGGGCTCACTCACCCACCACATTAACAACATAAAACCCCTCATTC  
ACACGAGAAAACACCCTCATGTTTACATACCTATCCCCCA  
TTCTCCTCCTATCCCTCAACCCCGACATCATTACGGGTTTTTCTCCTTGTAAATATAGTTTTAACAAAACATCAGATTGT  
GAATCTGACAACAGAGGCTTACGACCCCTTATTTACCGAG  
AAAGCTCACAAGAAGTCTAACTCATGCCCCATGTCTAACAACATGGCTTTTCTCAACTTTTTAAAGGATAACAGCTATCC  
ATTGGTCTTAGGCCCCAAAATTTTTGGTGCAACTCCAAT

AAAAGTAATAACCATGCACACTACTATAACCACCCTAACCCCTGACTTCCCTAATTCCCCCATCCTTACCACCCTCGTTA  
ACCCTAACAAAAAACTCATACCCCATTTATGTAAAATC  
CATTGTGCATCCACCTTTATTATCAGTCTCTTCCCCACAACAATATTCATGTGCCTAGACCAAGAAGTTATTATCTCGA  
ACTGACACTGAGCCACAACCCAAACAACCCAGCTCTCCCT  
AAGCTTCAAACCTAGACTACTTCTCCATAATATTCATCCCTGTAGCATTGTTTCGTTACATGGTCCATCATAGAATTCTCAC  
TGTGATATATAAACTCAGACCCAAACATTAATCAGTTCTT  
CAAATATCTACTCATCTTCCCTAATTACCATACTAATCTTAGTTACCGCTAACAAACCTATTCCAACCTGTTTCATCGGCTGAG  
AGGGCGTAGGAATTATATCCTTCTTGCTCATCAGTTGATG  
ATACGCCCCGAGCAGATGCCAACACAGCAGCCATTCAAGCAATCCTATAACAACCGTATCGGGCATATCGGTTTCATCCTCG  
CCTTAGCATGATTTATCCTACACTCCAACCTCATGAGACCC  
ACAACAATAGCCCTTCTAAACGCTAATCCAAGCCTCACCCACTACTAGGCCCTCCTCCTAGCAGCAGCAGGCAAATCAG  
CCCAATTAGGTCTCCACCCCTGACTCCCTCAGCCATAGA  
AGGCCCCACCCAGTCTCAGCCCTACTCCACTCAAGCACTATAGTTGTAGCAGGAATCTTCTTACTCATCCGCTTCCACC  
CCCTAGCAGAAAATAGCCCACTAATCCAACTCTAACACT  
ATGCTTAGGCGCTATCACCCTCTGTTTCGAGCAGTCTGCGCCCTTACACAAAATGACATCAAAAAAATCGTAGCCTTCT  
CCACTTCAAGTCAACTAGGACTCATAATAGTTACAATCGG  
CATCAACCAACCACACCTAGCATTCTGCACATCTGTACCCACGCCTTCTTCAAAGCCATACTATTTATGTGCTCCGGGT  
CCATCATCCACAACCTTAAACAATGAACAAGATATTCGAAA  
AATAGGAGGACTACTCAAACCATACCTCTCACTTCAACCTCCCTCACCATTGGCAGCCTAGCATTAGCAGGAATACCTT  
TCCTCACAGTTTTCTACTCCAAAGACCACATCATCGAAAC  
CGCAAACATATCATACACAAACGCCTGAGCCCTATCTATTACTCTCATCGCTACCTCCCTGACAAGCGCCTATAGCACTC  
GAATAATTTCTTCTCACCCCTAACAGGTCAACCTCGCTTCCC  
CACCCCTTACTAACATTAACGAAAATAACCCACCCCTACTAAACCCCATTAACGCCTGGCAGCCGGAAGCCTATTTCGCAG  
GATTTCTCATTACTAACAACATTTCCCCCGCATCCCCCTT  
CCAAACAACAATCCCCCTTACCTAAAACCTCACAGCCCTCGCTGTCACTTTCTTAGGACTTCTAACAGCCCTAGACCTCA  
ACTACCTAACCAACAACTTAAAATAAAATCCCCACTATG  
CACATTTTATTTCTCAAACATACTCGGATTCTACCCTAGCATCACACACCGCACAAATCCCCTATCTAGGCCCTTCTTACGA  
GCCAAAACCTGCCCCTACTCCTCCTAGACCTAACCTGACT  
AGAAAAGCTATTACTTAAACAATTTACAGCACCAAAATCTCCACCTCCATCATCACCTCAACCCAAAAGGCATAATTA  
AACTTTACTTCTCTTTCTTCTTCCCCTCATCCTAAC  
CCTACTCCTAATCACATAACCTATTCCCCGAGCAATCTCAATTACAATATATACACCAACAAAACAATGTTCAACCAGTA  
ACTACTACTAATCAACGCCATAATCATACAAAGCCCCCG  
CACCAATAGGATCCTCCCGAATCAACCCTGACCCCTCTCCTTACATAAATTATTAGCTTCTTACACTATTAAGTTTTACC  
ACAACCACCACCCCATCATACTCTTTCACCCACAGCACCA  
ATCCTACCTCCATCGCTAACCCCACTAAAACACTCACCAAGACCTCAACCCCTGACCCCATGCCTCAGGATACTCCTCA  
ATAGCCATCGCTGTAGTATATCCAAAGACAACCATCATTC  
CCCCTAAATAAATTAAAAAACTATTAACCCATATAACCTCCCCAAAATTGAGAATAATAACACACCCGACCACACCG  
CTAACAATCAATACTAAACCCCATAAATAGGAGAAGGCT  
TAGAAGAAAACCCACAAACCCCATTAATAACCCACACTCAACAGAAACAAAGCATAACATCATTATTCTCGCACGGACT  
ACAACCACGACCAATGATATGAAAAACCATCGTTGTATTT  
CAACTACAAGAACACCAATGACCCCAATACGCAAACTAACCCCTAATAAAAATTAATTAACCACTCATTTCATCGACCTC  
CCCACCCCATCCAACATCTCCGCATGATGAACTTCGGCT  
CACTCCTTGGCGCCTGCCTGATCCTCCAAATCACCACAGGACTATTCTAGCCATGCACTACTCACCAGACGCCTCAACC  
GCCTTTTCATCAATCGCCACATCACTCGAGACGTAAATT  
ATGGCTGAATCATCCGCTACCTTACGCCAATGGCGCCTCAATATTCTTTATCTGCCTCTTCTACACATCGGGCGAGGC  
CTATATTACGGATCATTCTCTACTCAGAAACCTGAAACA  
TCGGCATTATCCTCCTGCTTGCAACTATAGCAACAGCCTTTCATAGGCTATGTCTCCTCCCGTGAGGCCAAATATCATTCTGA  
GGGGCCACAGTAATTACAACTTACTATCCGCCATCCCAT  
ACATTGGGACAGACCTAGTTCAATGAATCTGAGGAGGCTACTCAGTAGACAGTCCCACCCTCACACGATTCTTTACCTTT  
CACTTCATCTTGCCCTTCAATTATTGCAGCCCTAGCAGCAC  
TCCACCTCCTATTCTTGACGAAACGGGATCAAACAACCCCTAGGAATCACCTCCCATTCCGATAAAATCACCTTCCAC  
CCTTACTACACAATCAAAGACGCCCTCGGCTTACTTCTCT  
TCCTTCTCTCCTTAATGACATTAACACTATTCTCACCAGACCTCCTAGGCGACCCAGACAATTATACCCTAGCCAACCC  
TTAAACACCCCTCCCCACATCAAGCCCGAATGATATTTCC  
TATTGCCTACACAATTTCTCCGATCCGTCCCTAACAACTAGGAGGCGTCTTGGCCCTATTACTATCCATCCTCATCCTA  
GCAATAATCCCCATCCTCCATATATCCAAACAACAAGCA

TAATATTTTCGCCACTAAGCCAATCACTTTATTGACTCCTAGCCGCAGACCTCCTCATTCTAACCTGAATCGGAGGACAA  
CCAGTAAGCTACCCTTTTACCATCATTGGACAAGTAGCAT  
CCGTACTATACTTCAACAATCCTAATCCTAATACCAACTATCTCCCTAATTGAAAACAAAATACTCAAATGGGCCTGT  
CCTTGTAGTATAAACTAATACACCAGTCTTGTAAACCGGA  
GATGAAAACCTTTTTTCCAAGGACAAATCAGAGAAAAAGTCTTTAACTCCACCATTAGCACCCAAAGCTAAGATTCTAATT  
TAAACTATT

#EUROPE Georgian

CCACAGTTTATGTAGCTTACCTCCTCAAAGCAATACACTGAAAATGTTTGTAGACGGGCTCACATCACCCCATAAACAAATA  
GGTTTGGTCTAGCCTTTCTATTAGCTCTTAGTAAGATTA  
CACATGCAAGCATCCCCATTCCAGTGAGTTCCACCTCTAAATCACCACGATCAAAGGGACAAGCATCAAGCACGCAGCA  
ATGCAGCTCAAACGCTTAGCCTAGCCACACCCCCACGGG  
AAACAGCAGTGATTAACCTTTAGCAATAAACGAAAGTTTTAACTAAGCTATACTAACCCAGGGTTGGTCAATTTTCGTGCC  
AGCCACCGCGGTACACGATTAACCCAAGTCAATAGAAGC  
CGGCGTAAAGAGTGTTTTAGATCACCCCTCCCCAATAAAGCTAAAACCTCACCTGAGTTGTAAAAACTCCAGTTGACAC  
AAAATAGACTACGAAAGTGGCTTTAACATATCTGAACACA  
CAATAGCTAAGACCCAAACTGGGATTAGATACCCCACTATGCTTAGCCCTAAACCTCAACAGTTAAATCAACAAAACCTGC  
TCGCCAGAACACTACGAGCCACAGCTTAAAACCTCAAAGGA  
CCTGGCGGTGCTTCATATCCCTCTAGAGGAGCCTGTTCTGTAATCGATAAACCCCGATCAACCTCACACCTCTTGCTCA  
GCCTATATACCGCCATCTTCAGCAAACCTGATGAAGGCT  
ACAAAGTAAGCGCAAGTACCCACGTAAGACGTTAGGTCAAGGTGTAGCCCATGAGGTGGCAAGAAATGGGCTACATTTT  
CTACCCAGAAAACCTACGATAGCCCTTATGAAACTTAAGG  
GTGCAAGGTGGATTTAGCAGTAAACTGAGAGTAGAGTGCTTAGTTGAACAGGGCCCTGAAGCGCGTACACACCGCCCGTC  
ACCTCCTCAAGTATACTTCAAAGGACATTTAACTAAAAC  
CCCTACGCATTTATATAGAGGAGACAAGTCGTAACATGGTAAGTGTACTGGAAAGTGCACCTGGACGAACCAGAGTGTAG  
CTTAACACAAAGCACCCAACCTTACACTTAGGAGATTTCAA  
CTTAACTTGACCGCTCTGAGCTAAACCTAGCCCCAAACCCACTCCACCTTACTACCAGACAACCTTAGCCAAAACCTTTA  
CCCCAATAAAGTATAGGCGATAGAAATTGAAACCTGGCGC  
AATAGATATAGTACCGCAAGGGAAAGATGAAAAATTATAAACCAAGCATAATATAGCAAGGACTAACCCCTATACCTTCTG  
CATAATGAATTAAGTAACTAGAAATAACTTTGCAAGGAGAACCA  
AAGCTAAGACCCCCGAAACCAGACGAGCTACCTAAGAAGCCTAAAAGAGCACACCCCGTCTATGTAGCAAAAATAGTGGGA  
AGATTTATAGGTAGAGGGCAGACAAACCTACCGAGCCTGGTG  
ATAGCTGGTTGTCCAAGATAGAATCTTAGTTCAACTTTAAATTTGCCACAGAACCCTCTAAATCCCCTTGTAATTTAA  
CTGTTAGTCCAAAGAGGAACAGCTCTTTGGACACTAGGAA  
AAAACCTTGTAGAGAGAGTAAAAAA-  
TTTTAACCCCATAGTAGGCCTAAAAGCAGCCACCAATTAAGAAAGCGTTCAAGCTCAACACCCACTACCTAAAAAA-  
TCCCAAACATATAACTG  
AACTCCTCACACCCAATTGGACCAATCTATCACCTATAGAAGAATAATGTTAGTATAAGTAACATGAAAACATTCTCC  
TCCGCATAAGCCTGCGTCAGATTAACCAACTGAACTGACA  
ATTAACAGCCCAATATCTACAATCAACCAACAAGTCATTATTACCCTCACTGTCAACCCAACACAGGCATGCTCATAAGG  
AAAGGTTAAAAAAGTAAAAGGAACCTCGGCAATCTTACC  
CCGCCTGTTTACCAAAAACATCACCTCTAGCATCACAGTATTAGAGGCACCGCCTGCCAGTGACACATGTTTAAACGGC  
CGCGGTACCCTAACCGTGCAAAGGTAGCATAATCACTTGT  
TCCTTAAATAGGGACCTGTATGAATGGCTCCACGAGGGTTGAGCTGTCTCTTACTTTTAAACCAGTGAAATTGACCTGCC  
GTGAAGAGGCGGGCATGACACAGCAAGACGAGAAGACCCT  
ATGGAGCTTTAATTTAATGCAAACAGTACCTAACAAACCCACAGGTCTAAACTACCAACCTGCATTAAAAATTTCC  
GGTTGGGGCGACCTCGGAGCAGAACCCAACTCCGAGCAG  
TACATGCTAAGACTTACCAGTCAAAGCGAACTACTATACTCAATTGATCCAATAACTTGACCAACGGAACAAGTTACCC  
TAGGGATAACAGCGCAATCCTATTCTAGAGTCCATATCAA  
CAATAGGGTTTTACGACCTCGATGTTGGATCAGGACATCCCGATGGTGCAGCCGCTATTAAAGGTTTCGTTTGTTCACGAT  
TAAAGTCTACGTGATCTGAGTTCAGACCGGAGTAATCCA  
GGTCGGTTTTCTATCTACTTCAAATTCCTCCCTGTACGAAAGGACAAGAGAAATAAGGCCTACTTCACAAAGCGCCTTCCC  
CCGTAAATGATATCATCTCAACTTAGTATTATACCCACAC  
CCACCCAAGAACAGGGTTTTGTTAAGATGGCAGAGCCCGGTAATCGCATAAAAACCTTAAAACCTTTACAGTCAGAGGTTCAAT  
TCCTCTTCTTAAACAACATACCCATGGCCAACCTCCTACTC  
CTCATTGTACCCATTCTAATCGCAATGGCATTCTAATGCTTACCGAACGAAAAATTCTAGGCTATATACAACCTACGCAA  
AGGCCCAACGTTGTAGGCCCTACGGGCTACTACAACCC

TTCGCTGACGCCATAAACTCTTACCAAAGAGCCCCTAAAACCCGCCACATCTACCATCACCTCTACATCACCGCCCC  
GACCTTAGCTCTCACCATCGCTCTTCTACTATGAACCCCC  
CTCCCCATACCCAACCCCTGGTCAACCTCAACCTAGGCCTCCTATTTATTCTAGCCACCTCTAGCCTAGCCGTTTACTC  
AATCCTCTGATCAGGGTGAGCATCAAACCTCAAACCTACGCC  
CTGATCGGCGCACTGCGAGCAGTAGCCCAAACAATCTCATATGAAGTCACCCTAGCCATCATTCTACTATCAACATTACT  
AATAAGTGGCTCCTTTAACCTCTCCACCCTTATCACAACA  
CAAGAACACCTCTGATTACTCCTGCCATCATGACCCTTGGCCATAATATGATTTATCTCCACACTAGCAGAGACCAACCG  
AACCCCTTCGACCTTGCCGAAGGGGAGTCCGAACCTAGTC  
TCAGGCTTCAACATCGAATACGCCGAGGCCCTTTCGCCCTATTCTTCATAGCCGAATACACAAACATTATTATAATAAA  
CACCTCACACTACAATCTTCTTAGGAACAACATATGAC  
GCACTCTCCCCTGAACTTACACAACATATTTTGTCAACAAGACCCTACTTCTAACCTCCCTGTTCTTATGAATTGAAAC  
AGCATACCCCCGATTCCGCTACGACCAACTCATAACCTC  
CTATGAAAAAACTTCTACCCTCACCTAGCATTACTTATATGACATGTCTCCATACCCATTACAATCTCCAGCATTCC  
CCCTCAAACCTAAGAAATATGTCTGATAAAAAGAGTTACTT  
TGATAGAGTAAATAATAGGAGCTTAAACCCCTTATTTCTAGGACTATGAGAATCGAACCCTCCCTGAGAATCCAAAAT  
TCTCCGTGCCACCTATCACACCCCATCCTAAAGTAAGGTC  
AGCTAAATAAGCTATCGGGCCCATACCCCGAAAATGTTGGTTATACCCTTCCCGTACTAATTAATCCCCTGGCCCAACCC  
GTCATCTACTCTACCATCTTTCAGGCACACTCATCACAG  
CGCTAAGCTCGCACTGATTTTTTACCTGAGTAGGCCTAGAAATAAACATGCTAGCTTTTTATTCCAGTTCTAACCAAAAA  
ATAAACCCCTCGTTCCACAGAAGCTGCCATCAAGTATTTCC  
TCACGCAAGCAACCGCATCCATAATCCTTCTAATAGCTATCCTCTTCAACAATATACTCTCCGGACAATGAACCATAACC  
AATACTACCAATCAATACTCATCATTAAATAATCATAATGG  
CTATAGCAATAAACTAGGAATAGCCCCCTTTCACTTCTGAGTCCCAGAGGTTACCCAAGGCACCCCTCTGACATCCGGC  
CTGCTTCTTCTCACATGACAAAACTAGCCCCCATCTCAA  
TCATATACCAAATCTCTCCCTCACTAGACGTAAGCCTTCTCCTCACTCTCTCAATCTTATCCATCATAGCAGGCAGTTGA  
GGTGGATTAAACCAAACCCAGCTACGCAAAATCTTAGCAT  
ACTCCTCAATTACCCACATAGGATGAATAATAGCAGTTCTACCGTACAACCCTAACATAACCATTCTTAATTTAACTATT  
TATATTATCCTAATACTACTACCGCATTCTACTACTCACT  
TAAACTCCAGCACCAGCCCTACTACTATCTCGCACCTGAAACAAGCTAACATGACTAACACCCTTAATTCCATCCACC  
CTCCTCTCCCTAGGAGCCTGCCCCGCTAACCGGCTTTT  
TGCCCAAATGGGCCATTATCGAAGAATTCAAAAAACAATAGCCTCATCATCCCCACCATCATAGCCACCATCACCCCTC  
CTTAACCTCTACTTCTACCTACGCCTAATCTACTCCACCT  
CAATCACACTACTCCCATATCTAACAACGTAATAAATAAATGACAGTTTGAACATACAAAACCCACCCCATCTCCCC  
ACACTCATCGCCCTTACCACGCTACTCCTACCTATCTCCC  
CTTTTATACTAATAATCTTATAGAAATTTAGGTTAAATACAGACCAAGAGCCTTCAAAGCCCTCAGTAAGTTGCAATACT  
TAATTTCTGTAACAGCTAAGGACTGCAAAAACCCACTCTG  
CATCAACTGAACGCAATCAGCCACTTTAATTAAGCTAAGCCCTTACTAGACCAATGGGACTTAAACCCACAAACACTTA  
GTTAACAGCTAAGCACCTAATCAACTGGCTTCAATCTAC  
TTCTCCCGCCGCGGGAAAAAAGGCGGGGAGAAGCCCCGGCAGGTTTGAAGCTGCTTCTTGAATTTGCAATTCATATGA  
AAATCACCTCGGAGCTGGTAAAAAGAGGCCTAACCCCTGT  
CTTTAGATTTACAGTCCAATGCTTCACTCAGCCATTTTACCTCACCCCC-  
ACTGATGTTCCGCCGACCGTTGACTATTCTCTACAAACCACAAAGACATTGGAACACTATACTATTATTC  
GGCGCATGAGCTGGAGTCTTAGGCACAGCTCTAAGCCTCCTTATTCGAGCCGAGCTGGGCCAGCCAGGCAACCTTCTAGG  
TAACGACCACATCTACAACGTTATCGTCACAGCCCATGCA  
TTTGTAAATAATCTTCTCATAGTAATACCCATCATAATCGGAGGCTTTGGCAACTGACTAGTTCCCCTAATAATCGGTGC  
CCCCGATATGGCGTTTCCCCGCATAAACAACATAAGCTTC  
TGACTCTTACCTCCCTCTCTACTCTCTGCTCGCATCTGCTATAGTGGAGGCCGGAGCAGGAACAGGTTGAACAGTCTA  
CCCTCCCTTAGCAGGGAATACTCCCACCCTGGAGCCTCC  
GTAGACCTAACCATCTTCTCCTTACACCTAGCAGGTGTCTCCTCTATCTTAGGGGCCATCAATTTTATCACAACAATTAT  
CAATATAAAACCCCTGCCATAACCCAATACCAAACGCC  
CTCTTCGTCTGATCCGTCTAATCACAGCAGTCTACTTCTCCTATCTCTCCAGTCTTAGCTGCTGGCATCACTATACT  
ACTAACAGACCGCAACCTCAACACCACCTTCTTCGACCCC  
GCCGGAGGAGGAGACCCATTCTATACCAACACCTATTCTGATTTTTTCGGTCACCCTGAAGTTTATATTCTTATCCTACC  
AGGCTTCGGAATAATCTCCCATATTGTAACCTTACTACTCC  
GGAAAAAAGAACCATTTGGATACATAGGTATGGTCTGAGCTATGATATCAATTGGCTTCTTAGGGTTTATCGTGTGAGC  
ACACCATATATTTACAGTAGGAATAGACGTAGACACACGA

GCATATTTACCTCCGCTACCATAATCATCGCTATCCCCACCGCGTCAAAGTATTTAGCTGACTCGCCACACTCCACGG  
AAGCAATATGAAATGATCTGCTGCAGTCTCTGAGCCCTA  
GGATTCATCTTTCTTTTACCCTAGGTGGCCTGACTGGCATTGTATTAGCAAACCTCATCACTAGACATCGTACTACACGA  
CACGTACTACGTTGTAGCTCACTTCCACTATGTCCTATCA  
ATAGGAGCTGTATTTGCCATCATAGGAGGCTTCATTCCTGATTTCCCTATTCTCAGGCTACACCCTAGACCAAACCTA  
CGCCAAAATCCATTTCACTATCATATTCATCGGCGTAAAT  
CTAACTTTCTTCCCACAACACTTTCTCGGCCTATCCGGAATGCCCCGACGTTACTCGGACTACCCCGATGCATACACCAC  
ATGAAACATCCTATCATCTGTAGGCTCATTCACTTTCTCTA  
ACAGCAGTAATATTAATAATTTTCATGATTTGAGAAGCCTTCGCTTCGAAGCGAAAAGTCTAATAGTAGAAGAACCCTC  
CATAAACCTGGAGTGACTATATGGATGCCCCCACCCTAC  
CACACATTCGAAGAACCCTGATACATAAAAATCTAGACAAAAAAGGAAGGAATCGAACCCCCAAAGCTGGTTTTCAAGCCA  
ACCCCATGGCCTCCATGACTTTTTTCAAAAAGGTATTAGAA  
AAACCATTTATAACTTTGTCAAAGTTAAATTATAGGCTAAATCCTATATATCTTAATGGCACATGCAGCGCAAGTAGGT  
CTACAAGACGCTACTTCCCCTATCATAGAAGAGCTTATCA  
CCTTTTCATGATCACGCCCTATAATCATTTTTCTTTATCTGCTTCTTAGTCTGTATGCCCTTTTTCTAACACTCACAACA  
AAACTAACTAATACTAACATCTCAGACGCTCAGGAAATAG  
AAACCGTCTGAACTATCCTGCCCGCCATCATCCTAGTCTCATCGCCCTCCCATCCCTACGCATCCTTTACATAACAGAC  
GAGGTCAACGATCCCTCCCTTACCATCAAATCAATTGGCC  
ACCAATGGTACTGAACCTACGAGTACACCGACTACGGCGGACTAATCTTCAACTCCTACATACTTCCCCATTATTCTA  
GAACCAGGCGACCTGCGACTCCTTGACGTTGACAATCGAG  
TAGTACTCCCGATTGAAGCCCCCATTTCGTATAATAATTACATCACAAGACGTCTTGCCTCATGAGCTGTCCCCACATTA  
GGCTTAAAAACAGATGCAATTCCTCGGACGTCTAAACAAA  
CCACTTTACCGCTACACGACCGGGGTATACTACGGTCAATGCTCTGAAATCTGTGGAGCAAACCACAGTTTTCATGCC  
ATCGTCTTAGAATTAATTTCCCCTAAAAATCTTTGAAATAG  
GGCCCGTATTTACCCTATAGCACCCCTCTACCCCTCTAGAGCCACTGTAAAGCTAACTTAGCATTAACTTTTTAAGT  
TAAAGATTAAGAGAACCAACACCTCTTTACAGTGAAATGC  
CCCAACTAAATACTACCGTATGGCCACCATAATTACCCCTACTCCTTACACTATTCTCATCACCCAACTAAAAATA  
TTAAACACAAAATACCACCTACCTCCCTCACCAAAGCCCA  
TAAAAATAAAAAATTATAACAAACCTGAGAACCAAAATGAACGAAAATCTGTTTCGCTTCACTTATTGCCCCCAATCC  
TAGGCCTACCCGCGCAGTACTGATCATTCTATTTCCCC  
TCTATTGATCCCCACCTCCAAATATCTCATCAACAACCGACTAATCACCACCCAACAATGACTAATCAAACCTAACCTCAA  
AACAAATAATAACCATAACAAACACTAAAGGACGAACCTG  
ATCTCTTATACTAGTATCCTTAATCATTTTTATTGGCCACAATAACCTCCTCGGACTCCTGCCTCACTCATTTACACCAA  
CCACCCAACTATCTATAAACCTAGCCATGGCCATCCCCTT  
ATGAGCGGGCGCAGTGATTATAGGCTTTTCGCTCTAAGATTAATAATGCCCTAGCCACTTCTTACCACAAGGCACACCTA  
CACCCCTTATCCCCATACTAGTTATTATCGAAACCATCG  
CCTACTCATTCAACCAATAGCCCTGGCCGTACGCCTAACCGCTAACATTACTGCAGGCCACCTACTCATGCACCTAATTG  
GAAGCGCCACCCTAGCAATATCAACCATTAACCTTCCCTC  
TACTTTATCATCTTACAATTTAATTCTACTGACTATCCTAGAAATCGCTGTGCCTTAATCCAAGCCTACGTTTTCA  
CACTTCTAGTAAGCCTCTACCTGCACGACAACACATAATG  
ACCCACCAATCACATGCCTATCATATAGTAAACCCAGCCCATGACCCCTAACAGGGGCCCTCTCAGCCCTCCTAATGAC  
CTCCGGCCTAGCCATGTGATTTCACTTCCACTCCATAACG  
CTCCTCATACTAGGCCTACTAACCAACACACTAACCATATACCAATGATGGCGCGATGTAACACGAGAAAGCACATACCA  
AGGCCACCACACACCACCTGTCCAAAAGGCCTTCGATAC  
GGGATAATCCTATTTATTACCTCAGAAGTTTTTTCTTCGCAGGATTTTTCTGAGCCTTTTACCCTCCAGCCTAGCCCC  
TACCCCAATTAGGAGGGCACTGGCCCCAACAGGCATC  
ACCCCGCTAAATCCCCTAGAAGTCCCCTCTAAACACATCCGTATTACTCGCATCAGGAGTATCAATCACCTGAGCTCA  
CCATAGTCTAATAGAAAACAACCGAAACCAATAATTCAA  
GCACTGCTTATTACAATTTTACTGGGTCTCTATTTTACCCTCCTACAAGCCTCAGAGTACTTCGAGTCTCCCTTACCAT  
TTCCGACGGCATCTACGGCTCAACATTTTTTTGTAGCCACA  
GGCTTCCACGGACTTCACGTCATTATTGGCTCAACTTTCTCCTACTATCTGCTTCTATCCGCCAACTAATATTTCACTTTAC  
ATCCAAACATCACTTTGGCTTCGAAGCCGCGCCTGATAC  
TGGCATTTTGTAGATGTGGTTTACTATTTCTGTATGTCTCCATCTATTGATGAGGGTCTTACTCTTTTTAGTATAAATAG  
TACCGTTAACTTCCAATTAACCTAGTTTTGACAACATTCAA  
AAAAGAGTAATAAACTTCGCCTTAATTTTAATAATCAACACCCTCCTAGCCTTACTACTAATAATTATTACATTTTACT  
ACCACAACCTCAACGGCTACATAGAAAATCCACCCCTTAC

GAGTGC GGCTTCGACCTATATCCCCGCCCCGCGTCCCTTTCTCCATAAAAATTCTTCTTAGTAGCTATTACCTTCTTATT  
ATTTGATCTAGAAAATTGCCCTCCTTTTACCCCTACCATGA  
GCCCTACAAACAACCTAACCTGCCACTAATAGTTATGTATCCCTCTTATTAATCATCATCTAGCCCTAAGTCTGGCCTA  
TGAGTGACTACAAAAAGGATTAGACTGAACCGAATTGGTA  
TATAGTTTAAACAAAACGAATGATTTTCGACTCATTAAATTATGATAATCATATCTACCAAATGCCCTCATTACATAAA  
TATTATACTAGCATTACCATCTCACTTCTAGGAATACTA  
GTATATCGCTCACACCTCATATCCTCCCTACTATGCCTAGAAGGAATAATACTATCGCTGTTTATTATAGCTACTCTCAT  
AACCTCAACACCCACTCCCTCTTAGCCAATATTGTGCCT  
ATTGCCATACTAGTCTTTGCCGCCTGCGAAGCAGCGGTGGGCCTAGCCCTACTAGTCTCAATCTCCAACACATATGGCCT  
AGACTACGTACATAACCTAAACCTACTCCAATGCTAAAA  
TAATCGTCCCAACAATTATATTACTACCACTGACATGACTTTCCAAAAACACATAAATTTGAATCAACACAACCACCCAC  
AGCCTAATTATTAGCATCATCCCTCTACTATTTTTTAACC  
AAATCAACAACAACCTATTTAGCTGTTCCCAACCTTTTCTCCGACCCCTAACACCCCTCCTAATACTAACTACC  
TGACTCCTACCCCTCACAATCATGGCAAGCCAACGCCACT  
TATCCAGTGAACCACTATCACGAAAAAACTCTACCTCTCTATACTAATCTCCCTACAAATCTCCTTAATTATAACATTC  
ACAGCCACAGAATAATCATATTTTATATCTTCTTCGAAA  
CCACACTTATCCCCACCTTGGCTATCATCACCCGATGAGGCAACCAGCCAGAACGCCTGAACGCAGGCACATACTTCCTA  
TTCTACACCCTAGTAGGCTCCCTTCCCCTACTCATCGCAC  
TGATTTACACTCACAACACCCTAGGCTCACTAAACATTCTACTACTCACTCTCACTGCCAAGAACTATCAAACCTCCTGA  
GCCAACAACCTTAATATGACTAGCTTACACAATAGCTTTTA  
TAGTAAAGATACCTCTTTACGGACTCCACTTATGACTCCCTAAAGCCCATGTGCAAGCCCCATCGCTGGGTCAATAGTA  
CTTGCCGCAGTACTCTTAAACTAGGCGGCTATGGTATAA  
TACGCCTCACACTCATTCTCAACCCCTGACAAAACACATAGCCTACCCCTTCTTGTACTATCCCTATGAGGCATAATT  
ATAACAAGCTCCATCTGCCTACGACAAACAGACCTAAAT  
CGCTCATTGCATACTCTTCAATCAGCCACATAGCCCTCGTAGTAACAGCCATTCTCATCCAAACCCCTGAAGCTTACC  
GGCGCAGTCACTCTCATAATCGCCACGGACTTACATCCT  
CATTACTATTCTGCCTAGCAAACCTCAAACCTACGAACGCCTCACAGTCGCATCATAATCCTCTCTCAAGGACTTCAAAC  
CTGCTCCCCTAATAAGCTTTTTGATGACTTCTAGCAAG  
TCGCTAACCTCGCCTTACCCCTACTTAACCTACTGGGAGAAGCTCTCTGTGCTAGTAACCACGTTCTCCTGATCAAAT  
ATCACTCTCCTACTTACAGGACTCAACATACTAGTCACAG  
CCCTATACTCCCTCTACATATTTACCACAACACAATGGGGCTCACTCACCCACCACATTAACAACATAAAACCCCTCATTC  
ACACGAGAAAACACCCTCATGTTTACACCTATCCCCCA  
TTCTCCTCCTATCCCTCAACCCCGACATCATTACCGGGTTTTCTCTTGTAAATATAGTTTTAACAAAACATCAGATTGT  
GAATCTGACAACAGAGGCTTACGACCCCTTATTTACCGAG  
AAAGCTCACAAGAAGTCTAACTCATGCCCCATGTCTAACAACATGGCTTTTCTCAACTTTTTAAAGGATAACAGCTATCC  
ATTGGTCTTAGGCCCAAAAATTTTGGTGCAACTCCAAAT  
AAAAGTAATAACCATGCACACTACTATAACCACCCTAACCTGACTTCCCTAATTCCCCCATCCTTACCACCCTCGTTA  
ACCCTAACAAAAAAACTCATACCCCATTTATGTAAAATC  
CATTGTGCATCCACCTTTATTATCAGTCTCTTCCCACAACAATATTATCATGTGCCTAGACCAAGAAGTTATTATCTCGA  
ACTGACACTGAGCCACAACCCAAACAACCCAGCTCTCCCT  
AAGCTTCAAACCTAGACTACTTCTCCATAATATTCATCCCTGTAGCATTGTTGTTACATGGTCCATCATAGAATTCTCAC  
TGTGATATATAAACTCAGACCCAAACATTAATCAGTTCTT  
CAAATATCTACTCATCTTCCCTAATTACCATACTAATCTTAGTTACCGCTAACAACTATTCCAACCTGTTTATCGGCTGAG  
AGGGCGTAGGAATTATATCCTTCTTGCTCATCAGTTGATG  
ATACGCCCCGAGCAGATGCCAACACAGCAGCCATTCAAGCAATCCTATAACAACCGTATCGGCGATATCGGTTTATCCTCG  
CCTTAGCATGATTTATCCTACACTCCAACCTCATGAGACCC  
ACAACAATAGCCCTTCTAAACGCTAATCCAAGCCTCACCCACTACTAGGCCTCCTCCTAGCAGCAGCAGGCAAATCAG  
CCCAATTAGGTCTCCACCCTGACTCCCCTCAGCCATAGA  
AGGCCCCACCCAGTCTCAGCCCTACTCCACTCAAGCACTATAGTTGTAGCAGGAATCTTCTTACTCATCCGCTTCCACC  
CCCTAGCAGAAAATAGCCCACTAATCCAAACTCTAACACT  
ATGCTTAGGCGCTATCACCACTCTGTTTCGAGCAGTCTGCGCCCTTACACAAAATGACATCAAAAAAATCGTAGCCTTCT  
CCACTTCAAGTCAACTAGGACTCATAATAGTTACAATCGG  
CATCAACCAACCACACCTAGCATTCTGCACATCTGTACCCACGCCTTCTTCAAAGCCATACTATTTATGTGCTCCGGAT  
CCATCATCCACAACCTTAAACAATGAACAAGATATTCGAAA  
AATAGGAGGACTACTCAAACCATACCTCTCACTTCAACCTCCCTCACCATTTGGCAGCCTAGCATTAGCAGGAATACCTT  
TCCTCACAGTTTTCTACTCCAAGACCACATCATCGAAAC

CGCAAACATATCATAACAAACGCCTGAGCCCTATCTATTACTCTCATCGCTACCTCCCTGACAAGCGCCTATAGCACTC  
GAATAATTCTTCTCACCTAACAGGTCAACCTCGTTCCC  
CACCTTACTAACATTAACGAAATAACCCACCCCTACTAAACCCATTAAACGCCTGGCAGCCGGAAGCCTATTTCGCAG  
GATTTCTCATTACTAACAACATTTCCCCCGCATCCCCCTT  
CCAAACAACAATCCCCCTTACCTAAAACCTCACAGCCCTCGCTGTCACTTTCTTAGGACTTCTAACAGCCCTAGACCTCA  
ACTACCTAACCAACAACTTAAAATAAAATCCCCACTATG  
CACATTTTATTTCTCCAACATACTCGGATTCTACCTTAGCATCACACACCCGCACAATCCCCCTATCTAGGCCTTCTTACGA  
GCCAAAACCTGCCCCTACTCCTCCTAGACCTAACCTGACT  
AGAAAAGCTATTACCTAAAACAATTTACAGCACCAAAATCTCCACCTCCATCATCACCTCAACCCAAAAAGGCATAATTA  
AACTTTACTTCTCTCTTTCTTCTTCCCCTCATCTAAC  
CCTACTCCTAATCACATAACCTATTCCCCGAGCAATCTCAATTACAATATATACACCAACAAACAATGTTCAACCAGTA  
ACTACTACTAATCAACGCCCATAGTCATACAAAGCCCCCG  
CACCAATAGGATCCTCCCGAATCAACCCCTGACCCCTCTCCTTCATAAATTATTTCAGCTTCTTACACTATTAAAGTTTACC  
ACAACCACCACCCCATCATACTCTTTACCCACAGCACCA  
ATCCTACCTCCATCGCTAACCCCACTAAAACCTCACCAAGACCTCAACCCCTGACCCCATGCCTCAGGATACTCCTCA  
ATAGCCATCGCTGTAGTATATCCAAAGACAACCATCATTC  
CCCCTAAATAAATTAATAAACTATTAAACCCATATAACCTCCCCAAAATTTCAGAATAATAACACACCCGACCACACCG  
CTAACAAATCAATACTAAACCCCATAAATAGGAGAAGGCT  
TAGAAGAAAACCCACAAACCCCATTAATAACCCACACTCAACAGAAAACAAAGCATAACATCATTATTCTCGCACGGACT  
ACAACCACGACCAATGATATGAAAAACCATCGTTGTATTT  
CAACTACAAGAACACCAATGACCCCAATACGAAAATTAACCCCTAATAAAATTAATTAACCACTCATTTCATCGACCTC  
CCCACCCCATCCAACATCTCCGCATGATGAAACTTCGGCT  
CACTCCTTGGCGCCTGCCTGATCCTCCAAATCACACAGGACTATTCTTAGCCATACACTACTACCAGACGCCTCAACC  
GCCTTTTCATCAATCGCCACATCACTCGAGACGTAAATT  
ATGGCTGAATCATCCGCTACCTTCACGCCAATGGCGCCTCAATATTCTTTATCTGCCTCTTCTACACATCGGGCGAGGC  
CTATATTACGGATCATTTCTCTACTCAGAAACCTGAAACA  
TCGGCATTATCCTCCTGCTTGCAACTATAGCAACAGCCTTCATAGGCTATGTCTCCCGTGAGGCCAAATATCATTCTGA  
GGGGCCACAGTAATTACAAACTTACTATCCGCCATCCCAT  
ACATTGGGACAGACCTAGTTCAATGAATCTGAGGAGGCTACTCAGTAGACAGTCCCACCCTCACACGATTCTTTACCTTT  
CACTTCATCTTGCCCTTCATTATTGCAGCCCTAGCAGCAC  
TCCACCTCCTATTCTTGACGAAACGGGATCAAACAACCCCTAGGAATCACCTCCCATTCCGATAAAATCACCTTCCAC  
CCTTACTACACAATCAAAGACGCCCTCGGCTTACTTCTCT  
TCATTCTCTCCTTAATGACATTAACACTATTCTCACAGACCTCCTAGGCGACCCAGACAATTATACCCTAGCCAACCC  
TTAAACACCCCTCCCCACATCAAGCCCGAATGATATTTCC  
TATTTCGCTACACAATTCTCCGATCCGTCCCTAACAAAGCTAGGAGGCGTCTTGGCCCTATTACTATCCATCCTCATCCTA  
GCAATAATCCCCATCCTCCATATATCCAAACAACAAAGCA  
TAATATTTTCGCCCCTAAGCCAATCACTTTATTGACTCCTAGCCGAGACCTCCTCATTCTAACCTGAATCGGAGGACAA  
CCAGTAAGCTACCCTTTTACCATCATTGGACAAGTAGCAT  
CCGTACTATACTTCAACAATCCTAATCCTAATACCAACTATCTCCCTAATTGAAAACAAAATACTCAAATGGGCCTGT  
CCTTGTAGTATAAACTAATACACCAGTCTTGTAACCGAA  
GATGAAAACCTTTTTTCCAAGGACAAATCAGAGAAAAAGTCTTTAACTCCACCATTAGCACCCAAAGCTAAGATTCTAATT  
TAAACTATT

#EUROPE German

CCACAGTTTATGTAGCTTACCTCCTCAAAGCAATACACTGAAAATGTTTGTAGACGGGCTCACATCACCCATAAAACAAATA  
GGTTTGGTCTAGCCTTTCTATTAGCTCTTAGTAAGATTA  
CACATGCAAGCATCCCCGTTCCAGTGAGTTTACCCTCTAAATCACACGATCAAAGGGACAAGCATCAAGCACGCAGCA  
ATGCAGCTCAAACGCTTAGCCTAGCCACACCCCCACGGG  
AAACAGCAGTGATTAACCTTTAGCAATAAACGAAAGTTTAACTAAGCTATACTAACCCAGGGTTGGTCAATTTTCGTGCC  
AGCCACCGCGGTACACGATTAACCCAAGTCAATAGAAGC  
CGGCGTAAAGAGTGTTTTAGATCACCCCTCCCCAATAAAGCTAAAACCTCACCTGAGTTGTAAAAAACTCCAGTTGACAC  
AAAATAGACTACGAAAGTGGCTTTAACATATCTGAACACA  
CAATAGCTAAGACCCAACTGGGATTAGATACCCCACTATGCTTAGCCCTAAACCTCAACAGTTAAATCAACAAAACCTGC  
TCGCCAGAACACTACGAGCCACAGCTTAAAACCTCAAAGGA  
CCTGGCGGTGCTTCATATCCCTCTAGAGGAGCCTGTTCTGTAATCGATAAACCCCGATCAACCTCACACCTCTTGCTCA  
GCCTATATACCGCCATCTTCAGCAAACCCCTGATGAAGGCT

ACAAAGTAAGCGCAAGTACCCACGTAAAGACGTTAGGTCAAGGTGTAGCCCATGAGGTGGCAAGAAATGGGCTACATTTT  
CTACCCCAGAAAACACTACGATAGCCCTTATGAAACTTAAGG  
GTCGAAGGTGGATTTAGCAGTAAACTGAGAGTAGAGTGCTTAGTTGAACAGGGCCCTGAAGCGCGTACACACCGCCCGTC  
ACCCTCCTCAAGTATACTTCAAAGGACATTTAACTAAAAC  
CCCTACGCATTTATATAGAGGAGACAAGTCGTAACATGGTAAGTGTACTGGAAAGTGCACCTTGGACGAACCAGAGTGTAG  
CTTAACACAAAGCACCCAACCTTACACTTAGGAGATTTCAA  
CTTAACCTTGACCGCTCTGAGCTAAACCTAGCCCCAAACCCACTCCACCTTACTACCAGACAACCTTAGCCAAACCATTTA  
CCCAAATAAAGTATAGGCGATAGAAATTGAAACCTGGCGC  
AATAGATATAGTACCGCAAGGGAAAGATGAAAAATTATAACCAAGCATAATATAGCAAGGACTAACCCCTATACCTTCTG  
CATAATGAATTAAC TAGAAATAACTTTGCAAGGAGAGCCA  
AAGCTAAGACCCCGAAACCAGACGAGCTACCTAAGAAGCAGCTAAAAGAGCACACCCGTCTATGTAGCAAAAATAGTGGGA  
AGATTTTATAGGTAGAGGGCACAACCTACCGAGCCTGGTG  
ATAGCTGGTTGTCCAAGATAGAATCTTAGTTCAACTTTAAATTTGCCACAGAACCCTCTAAATCCCCTTGTAATTTAA  
CTGTTAGTCCAAGAGGAACAGCTCTTTGGACACTAGGAA  
AAAACCTTGTAGAGAGAGTAAAAAA-  
TTTAACACCCATAGTAGGCCTAAAAGCAGCCACCAATTAAGAAAGCGTTCAAGCTCAACACCCACTACCTAAAAAA-  
TCCCAAACATATAACTG  
AACTCCTCACACCCAATTGGACCAATCTATCACCCCTATAGAAGAACTAATGTTAGTATAAGTAACATGAAAACATTCTCC  
TCCGCATAAGCCTGCGTCAGATTA AAAACACTGAACTGACA  
ATTAACAGCCCAATATCTACAATCAACCAACAAGTCATTATTACCCTCACTGTCAACCCAACACAGGCATGCTCATAAGG  
AAAGGTTAAAAAAGTAAAAGGAACTCGGCAATCTTACC  
CCGCCTGTTTACCAAAAACATCACCTCTAGCATCACCAGTATTAGAGGCACCGCCTGCCAGTGACACATGTTTAACGGC  
CGCGGTACCCTAACCGTGCAAAGGTAGCATAATCACTTGT  
TCCTTAAATAGGGACCTGTATGAATGGCTCCACGAGGGTTGAGCTGTCTCTTACTTTTAAACCAGTGAAATTGACCTGCC  
GTGAAGAGGCGGGCATGACACAGCAAGACGAGAAGACCCT  
ATGGAGCTTTAATTTATTAATGCAAACAGTACCTAACAAACCCACAGGTCCTAAACTACCAAACCTGCATTAAAAATTTT  
GGTTGGGGCGACCTCGGAGCAGAACCCAACCTCCGAGCAG  
TACATGCTAAGACTTACCAGTCAAAGCAGAACTACTATACTCAATTGATCCAATAACTTGACCAACGGAACAAGTTACCC  
TAGGGATAACAGCGCAATCTTATTCTAGAGTCCATATCAA  
CAATAGGGTTTTACGACCTCGATGTTGGATCAGGACATCCAATGGTGCAGCCGCTATTAAAGGTTGTTTTGTTCAACGAT  
TAAAGTCCTACGTGATCTGAGTTGAGACCGGAGTAATCCA  
GGTCGGTTTTCTATCTACTTTCAAATTCCTCCCTGTACGAAAGGACAAGAGAAATAAGGCCTACTTCCAAAGCGCCTTCCC  
CCGTAAATGATATCATCTCAACTTAGTATTATACCCACAC  
CCACCCAAGAACAGGGTTTTGTTAAGATGGCAGAGCCCGGTAATCGCATAAAACTTAAACTTTACAGTCAGAGGTTCAAT  
TCCTCTTCTTAAACAACATACCCATGGCCAACCTCCTACTC  
CTCATTGTACCCATTCTAATCGCAATGGCATTCTAATGCTTACCGAACGAAAAATTCTAGGCTATATACAACTACGCAA  
AGGCCCAACGTTGTAGGCCCTACGGGCTACTACAACCC  
TTGCTGACGCCATAAACTCTTCCAAAGAGCCCTAAAACCCGCCACATCTACCATCACCTCTACATCACCGCCCC  
GACCTTAGCTCTCACCATCGCTCTTCTACTATGAACCCCC  
CTCCCCATACCCAACCCCTGGTCAACCTCAACCTAGGCCTCCTATTTATTCTAGCCACCTCTAGCCTAGCCGTTTACTC  
AATCCTCTGATCAGGGTGAGCATCAAACCTCAAACCTACGCC  
CTGATCGGGCAGTGCAGAGCAGTAGCCAAACAATCTCATATGAAGTCACCCTAGCCATCATTCTACTATCAACATTACT  
AATAAGTGGCTCCTTTAACCTCTCCACCCTTATCACAACA  
CAAGAACACCTCTGATTACTCCTGCCATCATGACCCTTGGCCATAATATGATTTATCTCCACACTAGCAGAGACCAACCG  
AACCCCTTCGACCTTGCCGAAGGGGAGTCCGAACCTAGTC  
TCAGGCTTCAACATCGAATACGCCGAGGCCCTTCGCCCTATTCTTCATAGCCGAATACACAAACATTATTATAATAAA  
CACCTCACCACTACAATCTTCTTAGGAACAACATATGAC  
GCACTCTCCCCTGAACTCTACACAACATATTTTTGTACCAAGACCCTACTTCTAACCTCCCTGTTCTTATGAATTGAAAC  
AGCATACCCCGATTCCGCTACGACCAACTCATAACCTC  
CTATGAAAAAATTCCTACCCTACCCTAGCATTACTTATATGACATGTCTCCATACCCATTACAATCTCCAGCATTCC  
CCCTCAAACCTAAGAAATATGTCTGATAAAAGAGTTACTT  
TGATAGAGTAAATAATAGGAGCTTAAACCCCTTATTTCTAGGACTATGAGAATCGAACCCATCCCTGAGAATCCAAAAT  
TCTCCGTGCCACCTATCACACCCCATCCTAAAGTAAGGTC  
AGCTAAATAAGCTATCGGGCCCATACCCCGAAAATGTTGGTTATACCCCTTCCCGTACTAATTAATCCCCTGGCCCAACCC  
GTCATCTACTCTACCATCTTTGCAGGCACACTCATCACAG  
CGCTAAGCTCGCACTGATTTTTTACCTGAGTAGGCCTAGAAATAAACATGCTAGCTTTTTATTCCAGTTCTAACCAAAAA  
ATAAACCTCGTTCCACAGAAGCTGCCATCAAGTATTTCC

TCACGCAAGCAACCGCATCCATAATCCTTCTAATAGCTATCCTCTTCAACAATATACTCTCCGGACAATGAACCATAACC  
AATACTACCAATCAATACTCATCATTAAATAATCATAATGG  
CTATAGCAATAAAACTAGGAATAGCCCCCTTTCACCTTCTGAGTCCCAGAGGTTACCCAAGGCACCCCTCTGACATCCGGC  
CTGCTTCTTCTCACATGACAAAAACTAGCCCCCATCTCAA  
TCATATAACCAAATCTCTCCCTCACTAAACGTAAGCCTTCTCCTCACTCTCTCAATCTTATCCATCATAGCAGGCAGTTGA  
GGTGGATTAAACCAAACCCAGCTACGCAAAATCTTAGCAT  
ACTCCTCAATTACCCACATAGGATGAATAATAGCAGTTCTACCGTACAACCCTAACATAACCATTCTTAATTTAACTATT  
TATATTATCCTAACTACTACCGCATTCTACTACTCAACT  
TAAACTCCAGCACCACGACCCTACTACTATCTCGCACCTGAAACAAGCTAACATGACTAACACCCTTAATTCCATCCACC  
CTCCTCTCCCTAGGAGGCTGCCCCGCTAACCGGCTTTT  
TGCCCAAATGGGCCATTATCGAAGAATTCACAAAAACAATAGCCTCATCATCCCCACCATCATAGCCACCATCACCCCTC  
CTTAACCTCTACTTCTACCTACGCCTAATCTACTCCACCT  
CAATCACACTACTCCCATATCTAACAACGTAAAAATAAAATGACAGTTTGAACATACAAAACCCACCCCATTCCTCCCC  
ACACTCATCGCCCTTACCACGCTACTCCTACCTATCTCCC  
CTTTTATACTAATAATCTTATAGAAATTTAGGTTAAATACAGACCAAGAGCCTTCAAAGCCCTCAGTAAGTTGCAATACT  
TAATTTCTGTAACAGCTAAGGACTGCAAAACCCACTCTG  
CATCAACTGAACGCAAATCAGCCACTTTAATTAAGCTAAGCCCTTACTAGACCAATGGGACTTAAACCCACAAACACTTA  
GTTAACAGCTAAGCACCCCTAATCAACTGGCTTCAATCTAC  
TTCTCCCGCCGCGGGAAAAAAGGCGGGAGAAGCCCCGGCAGGTTTGAAGCTGCTTCTTGAATTTGCAATTTCAATATGA  
AAATCACCTCGGAGCTGGTAAAAAGAGGCCTAACCCCTGT  
CTTTAGATTTACAGTCCAATGCTTCACTCAGCCATTTTACCTCACCCCT-  
ACTGATGTTTCGCCGACCGTTGACTATTCTCTACAAACCACAAAGACATTGGAACACTATACTATTATTTC  
GGCGCATGAGCTGGAGTCTTAGGCACAGCTCTAAGCCTCCTTATTCGAGCCGAGCTGGGCCAGCCAGGCAACCTTCTAGG  
TAACGACCACATCTACAACGTTATCGTACAGCCCATGCA  
TTTGTAAATAATCTTCTTCATAGTAATACCCATCATAATCGGAGGCTTTGGCAACTGACTAGTTCCCTAATAATCGGTGC  
CCCCGATATGGCGTTCCTCCCGCATAAAACAACATAAGCTTC  
TGACTCTTACCTCCCTCTCTCCTACTCCTGCTCGCATCTGCTATAGTGGAGGCCGGAGCAGGAACAGGTTGAACAGTCTA  
CCCTCCCTTAGCAGGGAATACTCCCACCCTGGAGCCTCC  
GTAGACCTAACCATCTTCTCCTTACACCTAGCAGGTGTCTCCTCTATCTTAGGGGCCATCAATTTTATCACAACAATTAT  
CAATATAAAACCCCTGCCATAACCCAATACCAAACGCC  
CTCTTCGTCTGATCCGTCTAATCACAGCAGTCTACTTCTCCTATCTCTCCAGTCTTAGCTGCTGGCATCACTATACT  
ACTAACAGACCACAACCTCAACACCACCTTCTTCGACCC  
GCCGGAGGAGGAGACCCATTCTATACCAACACCTATTCTGATTTTTTCGGTACCCTGAAGTTTATATTCTTATCCTACC  
AGGCTTCGGAATAATCTCCCATATTGTAACCTTACTACTCC  
GGAAAAAAGAACCATTTGGATACATAGGTATGGTCTGAGCTATGATATCAATTGGCTTCTTAGGGTTTTATCGTGTGAGC  
ACACCATATATTTACAGTAGGAATAGACGTAGACACACGA  
GCATATTTACCTCCGCTACCATAATCATCGCTATCCCCACCGCGTCAAAGTATTTAGCTGACTCGCCACACTCCACGG  
AAGCAATATGAAATGATCTGCTGCAGTCTCTGAGCCCTA  
GGATTCATCTTTCTTTTACCCTAGGTGGCCTGACTGGCATTGTATTAGCAAACCTCATCACTAGACATCGTACTACACGA  
CACGTACTACGTTGTAGCTCACTTCCACTATGTCTATCA  
ATAGGAGCTGTATTTGCCATCATAGGAGGCTTCATTCCTGATTTCCCTATTCTCAGGCTACACCCTAGACCAAACCTA  
CGCCAAAATCCATTTCACTATCATATTCATCGGCGTAAAT  
CTAACTTTCTTCCCAACACTTTCTCGGCCTATCCGGAATGCCCCGACGTTACTCGGACTACCCCGATGCATACACCAC  
ATGAAACATCCTATCATCTGTAGGCTCATTCAATTTCTCTA  
ACAGCAGTAATATTAATAATTTTTCATGATTTGAGAAGCCTTCGCTTCGAAGCGAAAAGTCTAATAGTAGAAGAACCCTC  
CATAAACCTGGAGTGACTATATGGATGCCCCCACCCTAC  
CACACATTCGAAGAACCCTGATACATAAAATCTAGACAAAAAAGGAAGGAATCGAACCCCCCAAAGCTGGTTTTCAAGCCA  
ACCCCATGGCCTCCATGACTTTTTTCAAAAAGGTATTAGAA  
AAACCATTTTATAACTTTGTCAAAGTTAAATTATAGGCTAAATCCTATATATCTTAATGGCACATGCAGCGCAAGTAGGT  
CTACAAGACGCTACTTCCCCTATCATAGAAGAGCTTATCA  
CCTTTTCATGATCACGCCCTCATAATCATTTTCTTATCTGCTTCTTAGTCTGTATGCCCTTTTCTTAACTCACAACA  
AAACTAACTAATACTAACATCTCAGACGCTCAGGAAATAG  
AAACCGTCTGAACTATCCTGCCCGCCATCATCCTAGTCTCATCGCCCTCCCATCCCTACGCATCCTTTACATAACAGAC  
GAGGTCAACGATCCCTCCCTTACCATCAAATCAATTGGCC  
ACCAATGGTACTGAACCTACGAGTACACCGACTACGGCGGACTAATCTTCAACTCCTACATACTTCCCCATTATTCTTA  
GAACCAGGCGACCTGCGACTCCTTGACGTTGACAATCGAG

TAGTACTCCCGATTGAAGCCCCCATTTCGTATAATAATTACATCACAAAGACGTCTTGCACTCATGAGCTGTCCCCACATTA  
GGCTTAAAAACAGATGCAATTCCCGGACGTCTAAACCAA  
CCACTTTTACCAGCTACACGACCGGGGTATACTACGGTCAATGCTCTGAAATCTGTGGAGCAAACCACAGTTTTATGCCC  
ATCGTCTTAGAATTAATTCCTTAAAAATCTTTGAAATAG  
GGCCCGTATTTACCCTATAGCACCCCTCTACCCCTCTAGAGCCCACTGTAAAGCTAACTTAGCATTAACTTTTAAGT  
TAAAGATTAAGAGAACCAACACCTCTTTACAGTGAAATGC  
CCCACTAAATACTACCGTATGGCCACCATAATTACCCCATACTCCTTACACTATTCCTCATCACCCAATAAAAATA  
TTAAACACAACTACCACCTACCTCCCTCACCAAAGCCCA  
TAAAAATAAAAAATTATAACAAACCCTGAGAACCAAAATGAACGAAAATCTGTTTCGCTTCATTATTGCCCCACAATCC  
TAGGCCTACCCGCCGAGTACTGATCATTCTATTTCCCTC  
TCTATTGATCCCCACCTCCAAATATCTCATCAACAACCGACTAATCACCACCAACAATGACTAATCAAATAACCTCAA  
AACAAATGATAACCATACACAACACTAAAGGACGAACCTG  
ATCTCTTATACTAGTATCCTTAATCATTTTTATTGGCACAATAACCTCCTCGGACTCCTGCCTCACTCATTTACACCAA  
CCACCCAATACTATAAACCTAGCCATGGCCATCCCCTT  
ATGAGCGGGCGAGTGATTATAGGCTTTTCGCTCTAAGATTAATAATGCCCTAGCCCACTTCTTACCACAAGGCACACCTA  
CACCCCTTATCCCATACTAGTTATTATCGAAACCATCAG  
CCTACTCATTCAACCAATAGCCCTGGCCGTACGCCTAACCGCTAACATTACTGCAGGCCACCTACTCATGCACCTAATTG  
GAAGCGCCACCCTAGCAATATCAACCATTAACCTTCCCTC  
TACTTATCATCTTACAATTCTAATTCTACTGACTATCCTAGAAATCGCTGTGCCTTAATCCAAGCCTACGTTTTCA  
CACTTCTAGTAAGCCTCTACCTGCACGACAACACATAATG  
ACCCACCAATCACATGCCTATCATATAGTAAACCCAGCCCATGACCCCTAACAGGGGCCCTCTCAGCCCTCCTAATGAC  
CTCCGGCCTAGCCATGTGATTTCACTTCCACTCCATAACG  
CTCCTCATACTAGGCCTACTAACCAACACACTAACCATATACCAATGATGGCGCGATGTAACACGAGAAAGCACATACCA  
AGGCCACCACACACCACCTGTCCAAAAGGCCTTCGATAC  
GGGATAATCCTATTTATTACCTCAGAAGTTTTTTTCTTCGCAGGATTTTTCTGAGCCTTTTACCCTCCAGCCTAGCCCC  
TACCCCAATTAGGAGGGCACTGGCCCCAACAGGCATC  
ACCCCGCTAAATCCCCTAGAAGTCCCCTCCTAAACACATCCGTATTACTCGCATCAGGAGTGTCAATCACCTGAGCTCA  
CCATAGTCTAATAGAAAACAACCGAAACCAAATAAATCAA  
GCACTGCTTATTACAATTTTACTGGGTCTCTATTTTACCCTCCTACAAGCCTCAGAGTACTTCGAGTCTCCCTTACCCT  
TTCCGACGGCATCTACGGCTCAACATTTTTTTGTAGCCACA  
GGCTTCCACGGACTTCACGTCAATTATTGGCTCAACTTTTCTCACTATCTGCTTCATCCGCCAACTAATATTTCACTTTAC  
ATCCAAACATCACTTTGGCTTCGAAGCCGCCGCTGATAC  
TGGCATTGTTGTAGATGTGGTTTACTATTTCTGTATGTCTCCATCTATTGATGAGGGTCTTACTCTTTTAGTATAAATAG  
TACCGTTAACTTCCAATTAAGTATTTGACAACATTCAA  
AAAAGAGTAATAAACTTCGCCTTAATTTTAATAATCAACACCCTCCTAGCCTTACTACTAATAATTATTACATTTTACT  
ACCACAACCTCAACGGCTACATAGAAAATCCACCCCTTAC  
GAGTGCAGCTTCGACCCTATATCCCCCGCCGCGTCCCTTTCTCCATAAAATTTCTTCTTAGTAGCTATTACCTTCTTATT  
ATTTGATCTAGAAATTGCCCTCCTTTTACCCTACCATGA  
GCCCTACAAACAATAACCTGCCACTAATAGTTATGTATCCCTCTTATTAATCATCATCCTAGCCCTAAGTCTGGCCTA  
TGAGTGACTACAAAAGGATTAGACTGAGCCGAATTGGTA  
TATAGTTTAAACAAAACGAATGATTTGACTCATTAAATTATGATAATCATATTTACCAAATGCCCTCATTACATAAA  
TATTATACTAGCATTTACCATCTCACTTCTAGGAATACTA  
GTATATCGCTCACACCTCATATCCTCCCTACTATGCCTAGAAGGAATAATACTATCGCTGTTTATTATAGCTACTCTCAT  
AACCTCAACACCCACTCCCTCTTAGCCAATATTGTGCCT  
ATTGCCATACTAGTCTTTGCCGCTGCGAAGCAGCGGTGGCCCTAGCCCTACTAGTCTCAATCTCCAACACATATGGCCT  
AGACTACGTACATAACCTAAACCTACTCCAATGCTAAAAC  
TAATCGTCCCAACAATTATATTACTACCCTGACATGACTTTCCAAAAACACATAAATTGAATCAACACAACCACCCAC  
AGCCTAATTATTAGCATCATCCCTCTACTATTTTTTAACC  
AAATCAACAACAACCTATTTAGCTGTTCCCAACCTTTTCTCCGACCCCTAACAAACCCCTCCTAATACTAATACTACC  
TGACTCCTACCCCTCACAAATCATGGCAAGCCAACGCCACT  
TATCCAGTGAACCACTATCACGAAAAAACTCTACCTCTCTATACTAATCTCCCTACAAATCTCCTTAATTATAACATTC  
ACAGCCACAGAATAATCATATTTTATATCTTCTTCGAAA  
CCACACTTATCCCCACCTTGGCTATCATACCCGATGAGGCAACCAGCCAGAACGCCTGAACGCAGGCACATACTTCCCTA  
TTCTACACCCTAGTAGGCTCCCTTCCCTACTCATCGCAC  
TGATTTACTACTACAACACCCTAGGCTCACTAAACATTCTACTACTCACTCTCACTGCCAAGAATACTCAAACCTCCTGA  
GCCAACAATAATATGACTAGCTTACACAATAGCTTTTA

TAGTAAAGATACTCTTTACGGACTCCACTTATGACTCCCTAAAGCCCATGTGGAAGCCCCATCGCTGGGTCAATAGTA  
CTTGCCCGAGTACTCTTAAAACCTAGGCGGCTATGGTATAA  
TACGCCTCACACTCATTCTCAACCCCTGACAAAACACATAGCCTACCCCTTCTTGTACTATCCCTATGAGGCATAATT  
ATAACAAGCTCCATCTGCCTACGACAAAACAGACCTAAAAT  
CGCTCATTGCATACTCTTCAATCAGCCACATAGCCCTCGTAGTAACAGCCATTCTCATCCAAACCCCCTGAAGCTTCACC  
GGCGCAGTCACTTCTCATAATCGCCCACGGACTTACATCCT  
CATTACTATTCTGCCTAGCAAACCTCAAACCTACGAACGCACCTCACAGTCGCATCATAATCCTCTCTCAAGGACTTCAAACCT  
CTACTCCCCTAATAGCTTTTTGATGACTTCTAGCAAGCC  
TCGCTAACCTCGCCTTACCCCCACTATTAACCTACTGGGAGAAGCTCTCTGTGCTAGTAACCACGTTCTCCTGATCAAAT  
ATCACTCTCTACTTACAGGACTCAACATACTAGTCACAG  
CCCTATACTCCCTCTACATATTTACCACAACAATGGGGCTCACTCACCCACCACATTAACAACATAAAAACCCCTCATTC  
ACACGAGAAAACACCCCTCATGTTTATACACCTAGCCCCCA  
TTCTCCTCCTATCCCTCAACCCCGACATCATTACCGGGTTTTCTCTTGTAAATATAGTTTTAACAAAACATCAGATTGT  
GAATCTGACAACAGAGGCTTACGACCCCTTATTTACCGAG  
AAAGCTCACAAGAAGTCTAACTCATGCCCCATGTCTAACAACATGGCTTTTCTCAACTTTTTAAAGGATAACAGCTATCC  
ATTGGTCTTAGGCCCAAAAATTTTGGTGCAACTCCAAAT  
AAAAGTAATAACCATGCACACTACTATAACCACCCTAACCCCTGACTTCCCTAATTCCCCCATCCTTACCACCCTCGTTA  
ACCCTAACAAAAAAACTCATACCCCATTTATGTAAAATC  
CATTGTGCATCCACCTTTATTATCAGTCTCTTCCCCACAACAATATTATCATGTGCCTAGACCAAGAAGTTATTATCTCGA  
ACTGACACTGAGCCACAACCCAAACAACCCAGCTCTCCCT  
AAGCTTCAAACCTAGACTACTTCTCCATAATATTATCCCTGTGGCATTGTTGTTACATGGTCCATCATAGAATTCTCAC  
TGTGATATATAAACTCAGACCCAAACATTAATCAGTTCTT  
CAAATATCTACTCATCTTCCCTAATTACCATACTAATCTTAGTTACCGCTAACAAACCTATTCCAACCTGTTTCATCGGCTGAG  
AGGGCGTAGGAATTATATCCTTCTTGCTCATCAGTTGATG  
ATACGCCCCGAGCAGATGCCAACACAGCAGCCATTCAAGCAATCCTATACAACCGTATCGGGGATATCGGTTTCATCCTCG  
CCTTAGCATGATTTATCCTACACTCCAACCTCATGAGACCC  
ACAACAAATAGCCCTTCTAAACGCTAATCCAAGCCTCACCCACTACTAGGCCTCCTCCTAGCAGCAGCAGGCAAATCAG  
CCCAATTAGGCTCCACCCCTGACTCCCCTCAGCCATAGA  
AGGCCCCACCCAGTCTCAGCCCTACTCCACTCAAGCACTATAGTTGTAGCAGGAATCTTCTTACTCATCCGCTTCCACC  
CCCTAGCAGAAAATAGCCACTAATCCAACCTCTAACAT  
ATGCTTAGGCGCTATCACCCTCTGTTTCGAGCAGTCTGCGCCCTTACACAAAATGACATCAAAAAAATCGTAGCCTTCT  
CCACTTCAAGTCAACTAGGACTCATAATAGTTACAATCGG  
CATCAACCAACCACACCTAGCATTCTGACATCTGTACCCACGCCTTCTTCAAAGCCATACTATTTATGTGCTCCGGGT  
CCATCATCCACAACCTTAAACAATGAACAAGATATTCGAAA  
AATAGGAGGACTACTCAAACCATACCTCTCACTTCAACCTCCCTCACCATTTGGCAGCCTAGCATTAGCAGGAATACCTT  
TCCTCACAGGTTTTCTACTCCAAAGACCACATCATCGAAA  
CGCAAACATATCATAACAAACGCCTGAGCCCTATCTATTACTCTCATCGCTACCTCCCTGACAAGCGCCTATAGCACTC  
GAATAATTTCTTCTCACCCCTAACAGGTCAACCTCGCTTCCC  
CACCCCTTACTAACATTAACGAAAATAACCCACCCCTACTAAACCCCATTAACGCCTGACAGCCGGAAGCCTATTTCGCAG  
GATTTCTCATTACTAACAACATTTCCCCCGCATCCCCCTT  
CCAAACAACAATCCCCCTTACCTAAAACCTCACAGCCCTCGCTGTCACTTTCTTAGGACTTCTAACAGCCCTAGACCTCA  
ACTACCTAACCAACAAACTTAAAATAAAATCCCCACTATG  
CACATTTTATTTCTCCAACATACTCGGATTCTACCCTAGCATCACACACCCGACAATCCCCCTATCTAGGCCTTCTTACGA  
GCCAAAACCTGCCCCTACTCCTCCTAGACCTAACCTGACT  
AGAAAAGCTATTACCTAAAACAATTTACAGCACCAAATCTCCACCTCCATCATCACCTCAACCCAAAAAGGCATAATTA  
AACTTTACTTCTCTCTTTCTTCTTCCACTCATCCTAAC  
CCTACTCCTAATCACATAACCTATTCCCCCGAGCAATCTCAATTACAATATATACACCAACAAACAATGTTCAACCGTA  
ACTACTACTAATCAACGCCATAATCATAACAAGCCCCCG  
CACCAATAGGATCCTCCCGAATCAACCCTGACCCTCTCCTTATAAATTATTAGCTTCTTACTACTATTAAAGTTTACC  
ACAACCACCACCCATCATACTCTTTACCCACAGCACCA  
ATCCTACCTCCATCGCTAACCCCACTAAAACCTCACCAAGACCTCAACCCCTGACCCCATGCCTCAGGATACTCCTCA  
ATAGCCATCGCTGTAGTATATCCAAAGACAACCATCATTC  
CCCCTAAATAAATTAATAAAACTATTAACCCATATAACCTCCCCAAAATTGAGAATAATAACACACCCGACCACACCG  
CTAACAAATCAATACTAAACCCCATAAATAGGAGAAGGCT  
TAGAAGAAAACCCACAAACCCCATTAATAACCCCACTCAACAGAAAACAAGCATAACATCATTATTCTCGCACGGACT  
ACAACCACGACCAATGATATGAAAACCATCGTTGTATTT

CAACTACAAGAACACCAATGACCCCAATACGCAAATTAACCCCTAATAAAAATTAATTAACCACTCACTCATCGACCTC  
CCCACCCCATCCAACATCTCCGCATGATGAACTTCGGCT  
CACTCCTTGGCGCCTGCCTGATCCTCAAATCACCACAGGACTATTCTAGCCATGCACTACTCACCAGACGCCTCAACC  
GCCTTTTTCATCAATCGCCACATCACTCGAGACGTAAATT  
ATGGCTGAATCATCCGCTACCTTACGCAATGGCGCCTCAATATTCTTTATCTGCCTCTTCTACACATCGGGCGAGGC  
CTATATTACGGATCATTTCTCTACTCAGAACTGAAACA  
TCGGCATTATCCTCCTGCTTGCAACTATAGCAACAGCCTTCATAGGCTATGTCTCCCGTGAGGCCAAATATCATTCTGA  
GGGGCCACAGTAATTACAACTTACTATCCGCCATCCCAT  
ACATTGGGACAGACCTAGTTCAATGAATCTGAGGAGGCTACTCAGTAGACAGTCCCACCCTCACACGATTCTTTACCTTT  
CACTTCATCTTGCCCTTCAATTATTGCAGCCCTAGCAGCAC  
TCCACCTCCTATTCTTGACGAAACGGGATCAAACAACCCCTAGGAATCACCTCCCATTCCGATAAAATCACCTTCCAC  
CCTTACTACCAATCAAAGACGCCCTCGGCTTACTTCTCT  
TCATTCTCTCCTTAATGACATTAACACTATTCTCACCAGACCTCCTAGGCGACCCAGACAATTATACCCTAGCCAACCC  
TTAAACACCCCTCCCCACATCAAGCCCGAATGATATTTCC  
TATTGCTTACACAATTCTCCGATCCGTCCCTAACAACTAGGAGGCGTCTTGGCCCTATTACTATCCATCCTCATCCTA  
GCAATAATCCCCATCCTCCATATATCCAAACAACAAAGCA  
TAATATTTGCCCCACTAAGCCAATCACTTTATTGACTCCTAGCCGACAGCCTCCTCATTCTAACCTGAATCGGAGGACAA  
CCAGTAAGCTACCCTTTTACCATCATTGGACAAGTAGCAT  
CCGTACTATACTTACAACAATCCTAATCCTAATACCAACTATCTCCCTAATTGAAAACAAAATACTCAAATGGGCCTGT  
CCTTGTAGTATAAACTAATACACCAGTCTTGTAACCGGA  
GATGAAAACCTTTTTCCAAGGACAAATCAGAGAAAAGTCTTTAACTCCACCATTAGCACCCAAAGCTAAGATTCTAATT  
TAAACTATT

#EUROPE Italian

CCACAGTTTATGTAGCTTACCTCCTCAAAGCAATACACTGAAAATGTTTGTAGACGGGCTCACATCACCCCATAAACAAATA  
GGTTTGGTCTAGCCTTTCTATTAGCTCTTAGTAAGATTA  
CACATGCAAGCATCCCCGTTCCAGTGAGTTACCCTCTAAATCACCACGATCAAAGGGACAAGCATCAAGCACGCAGCA  
ATGCAGCTCAAACGCTTAGCCTAGCCACACCCCCAGGG  
AAACAGCAGTGATTAACCTTTAGCAATAAACGAAAGTTTAACTAAGCTATACTAACCCAGGGTTGGTCAATTTCTGTGCC  
AGCCACCGCGGTACACGATTAACCCAAGTCAATAGAAGC  
CGGCGTAAAGAGTGTTTTAGATCACCCCTCCCCAATAAAGCTAAAACCTCACCTGAGTTGTAAAAAATCCAGTTGACAC  
AAAATAGACTACGAAAGTGGCTTTAACATATCTGAACACA  
CAATAGCTAAGACCCAACTGGGATTAGATACCCCACTATGCTTAGCCCTAAACCTCAACAGTTAAATCAACAAAATGCT  
TCGCCAGAACACTACGAGCCACAGCTTAAAACCTCAAAGGA  
CCTGGCGGTGCTTCATATCCCTCTAGAGGAGCCTGTTCTGTAATCGATAAACCCCGATCAACCTCACACCTCTTGCTCA  
GCCTATATACCGCCATCTTCAGCAAACCTGATGAAGGCT  
ACAAAGTAAGCGCAAGTACCCACGTAAAGACGTTAGGTCAAGGTGTAGCCCATGAGGTGGCAAGAAATGGGCTACATTTT  
CTACCCAGAAAATACGATAGCCCTTATGAACTTAAGG  
GTCGAAGGTGGATTTAGCAGTAACTGAGAGTAGAGTGCTTAGTTGAACAGGGCCCTGAAGCGGTACACACCGCCCGTC  
ACCCTCCTCAAGTATACTTCAAAGGACATTTAACTAAAAC  
CCCTACGCATTTATATAGAGGAGACAAGTCGTAACATGGTAAGTGTACTGGAAAGTGCACCTGGACGAACCAGAGTGTAG  
CTTAACACAAAGCACCCAATTACACTTAGGAGATTTCAA  
CTTAACCTGACCGCTCTGAGCTAAACCTAGCCCCAAACCCACTCCACCTTACTACCAGACAACCTTAGCCAAACCATTTA  
CCCAAATAAAGTATAGGCGATAGAAATTGAAACCTGGCGC  
AATAGATATAGTACCGCAAGGGAAAGATGAAAAATTATAACCAAGCATAATATAGCAAGGACTAACCCCTATACCTTCTG  
CATAATGAATTAAGTAAATAAATTTGCAAGGAGAGCCA  
AAGCTAAGACCCCGAAACCCAGACGAGCTACCTAAGAACAGCTAAAAGAGCACACCCGTCTATGTAGCAAATAGTGGGA  
AGATTTATAGGTAGAGGCGACAAACCTACCGAGCCTGGTG  
ATAGCTGTTGTCCAAGATAGAATCTTAGTTCAACTTTAAATTTGCCACAGAACCCTCTAAATCCCCTTGTAATTTAA  
CTGTTAGTCCAAGAGGAACAGCTCTTTGGACACTAGGAA  
AAAACCTTGTAGAGAGAGTAAAAAA-  
TTTAACCCCATAGTAGGCCTAAAAGCAGCCACCAATTAAGAAAGCGTTCAAGCTCAACACCCACTACCTAAAAAA-  
TCCCAAACATATAACTG  
AACTCCTCACACCCAATTGGACCAATCTATCACCTATAGAAGAACTAATGTTAGTATAAGTAACATGAAAACATTCTCC  
TCCGCATAAGCCTGCGTCAGATTAACAACTGAACTGACA  
ATTAACAGCCCAATATCTACAATCAACCAACAAGTCATTATTACCCTCACTGTCAACCCAACACAGGCATGCTCATAAGG  
AAAGGTTAAAAAAGTAAAAGGAACCTCGGCAATCTTACC

CCGCCTGTTTACCAAAAACATCACCTCTAGCATCACCAGTATTAGAGGCACCGCCTGCCAGTGACACATGTTTAAACGGC  
CGCGGTACCCTAACCGTGCAAAGGTAGCATAATCACTTGT  
TCCTTAAATAGGGACCTGTATGAATGGCTCCACGAGGGTTAGCTGTCTCTTACTTTTAAACCAGTGAAATTGACCTGCC  
GTGAAGAGGCGGGCATGACACAGCAAGACGAGAAGACCCT  
ATGGAGCTTTAATTTATTAATGCAAACAGTACCTAACAAACCCACAGGTCCTAAACTACCAAACCTGCATTAATAAATTTT  
GGTTGGGGCGACCTCGGAGCAGAACCAACCTCCGAGCAG  
TACATGCTAAGACTTCACCAGTCAAAGCGAACTACTATACTCAATTGATCCAATAACTTGACCAACGGAACAAGTTACCC  
TAGGGATAACAGCGCAATCCTATTCTAGAGTCCATATCAA  
CAATAGGGTTTACGACCTCGATGTTGGATCAGGACATCCCGATGGTGCAGCCGCTATTAAAGGTTGTTTTGTTCAACGAT  
TAAAGTCCTACGTGATCTGAGTTCAGACCGGAGTAATCCA  
GGTCGGTTTTCTATCTACTTCAAATTCCTCCCTGTACGAAAGGACAAGAGAAATAAGGCCTACTTCACAAAGCGCCTTCCC  
CCGTAAATGATATCATCTCAACTTAGCATTATACCCACAC  
CCACCCAAGAACAGGGTTTTGTTAAGATGGCAGAGCCCGTAATCGCATAAAACTTAAAACCTTTACAGTCAGAGGTTCAAT  
TCCTCTTCTTAAACAACATACCCATGGCCAACCTCCTACTC  
CTCATTGTACCCATTCTAATCGCAATGGCATTCTAATGCTTACCGAACGAAAAATTCTAGGCTATATACAACCTACGCAA  
AGGCCCAACGTTGTAGGCCCTACGGGCTACTACAACCC  
TTCGCTGACGCCATAAAACTCTTACCAAAGAGCCCTAAAACCCGCCACATCTACCATCACCTCTACATCACCGCCCC  
GACCTTAGCTCTCACCATCGCTCTTCTACTATGAACCCCC  
CTCCCCATACCCAACCCCTGGTCAACCTCAACCTAGGCCTCCTATTTATTCTAGCCACCTCTAGCCTAGCCGTTTACTC  
AATCCTCTGATCAGGGTGAGCATCAAACCTCAAACCTAGCC  
CTGATCGGCGCACTGCGAGCAGTAGCCCAAACAATCTCATATGAAGTCACCCTAGCCATCATTCTACTATCAACATTACT  
AATAAGTGGCTCCTTTAACCTCTCCACCCTTATCACAACA  
CAAGAACACCTCTGATTACTCCTGCCATCATGACCCTTGGCCATAATATGATTTATCTCCACACTAGCAGAGACCAACCG  
AACCCCTTCGACCTTGCCGAAGGGGAGTCCGAACCTAGTC  
TCAGGCTTCAACATCGAATACGCCGAGGCCCTTCGCCCTATTCTTCATAGCCGAATACACAAACATTATTATAATAAA  
CACCTCACCACTACAATCTTCTAGGAACAACATATGAC  
GCACTCTCCCCTGAACCTACACAACATATTTTGTACCAAGACCCTACTTCTAACCTCCCTGTTCTTATGAATTGAAAC  
AGCATAACCCCGATTCCGCTACGACCAACTCATAACCTC  
CTATGAAAAAACTTCTTACCCTCACCTAGCATTACTTATATGATATGTCTCCATACCCATTACAATCTCCAGCATTCC  
CCCTCAAACCTAAGAAATATGTCTGATAAAAAGAGTTACTT  
TGATAGAGTAAATAATAGGAGCTTAAACCCCTTATTTCTAGGACTATGAGAATCGAACCCATCCCTGAGAATCCAAAAT  
TCTCCGTGCCACCTATCACACCCCATCCTAAAGTAAGGTC  
AGCTAAATAAGCTATCGGGCCCATACCCCGAAAATGTTGGTTATACCCTTCCCGTACTAATTAATCCCTGGCCCAACCC  
GTCATCTACTCTACCATCTTTCAGGCACACTCATCACAG  
CGCTAAGCTCGCACTGATTTTTTACCTGAGTAGGCCTAGAAATAAACATGCTAGCTTTTTATTCCAGTTCTAACCAAAAA  
ATAAACCTCGTTCCACAGAAGCTGCCATCAAGTATTTCC  
TCACGCAAGCAACCGCATCCATAATCCTTCTAATAGCTATCCTCTTCAACAATATACTCTCCGGACAATGAACCATAACC  
AATACTACCAATCAATACTCATATTAATAATCATAATGG  
CTATAGCAATAAAACTAGGAATAGCCCCCTTTCCTTCTGAGTCCCAGAGGTTACCCAAGGCACCCCTCTGACATCCGGC  
CTGCTTCTTCTCACATGACAAAACTAGCCCCCATCTCAA  
TCATATACCAAATCTCTCCCTCACTAAACGTAAGCCTTCTCCTCACTCTCTCAATCTTATCCATCATAGCAGGCAGTTGA  
GGTGGATTAAACCAAACCCAGCTACGCAAAATCTTAGCAT  
ACTCCTCAATTACCCACATAGGATGAATAATAGCAGTTCTACCGTACAACCCTAACATAACCATTCTTAATTTAACTATT  
TATATTATCCTAACTACTACCGCATTCTACTACTCAACT  
TAAACTCCAGCACCACGACCCTACTACTATCTCGCACCTGAAACAAGCTAACATGACTAACACCCTTAATTTCCATCCACC  
CTCCTCTCCCTAGGAGGCCTGCCCCGCTAACCGGCTTTT  
TGCCCAAATGGGCCATTATCGAAGAATTCACAAAAACAATAGCCTCATCATCCCCACCATCATAGCCACCATCACCCCTC  
CTTAACCTCTACTTCTACCTACGCTAATCTACTCCACCT  
CAATCACACTACTCCCATATCTAACAACGTAATAAATAAATGACAGTTTGAACATACAAAACCCACCCATTCTCCCC  
ACACTCATCGCCCTTACCACGCTACTCCTACCTATCTCCC  
CTTTTATACTAATAATCTTATAGAAATTTAGGTTAAATACAGACCAAGAGCCTTCAAAGCCCTCAGTAAGTTGCAATACT  
TAATTTCTGTAACAGCTAAGGACTGCAAAAACCCACTCTG  
CATCAACTGAACGCAATCAGCCACTTTAATTAAGCTAAGCCCTTACTAGACCAATGGGACTTAAACCCACAAACACTTA  
GTTAACAGCTAAGCACCTAATCAACTGGCTTCAATCTAC  
TTCTCCCGCCGCGGGAAAAAAGGCGGGGAGAAGCCCCGGCAGGTTTGAAGCTGCTTCTTGAATTTGCAATTCATATGA  
AAATCACCTCGGAGCTGGTAAAAAGAGGCCTAACCCCTGT

CTTTAGATTTACAGTCCAATGCTTCACTCAGCCATTTTACCTCACCCC-  
ACTGATGTTTCGCCGACCGTTGACTATTCTCTACAAACCACAAAGACATTGGAACACTATACTATTATTC  
GGCGCATGAGCTGGAGTCTTAGGCACAGCTCTAAGCCTCCTTATTCGAGCCGAGCTGGGCCAGCCAGGCAACCTTCTAGG  
TAACGACCACATCTACAACGTTATCGTACAGCCCATGCA  
TTTGTAAATAATCTTCTTCATAGTAATACCCATCATAATCGGAGGCTTTGGCAACTGACTAGTTCCTAATAATCGGTGC  
CCCCGATATGGCGTTTTCCCCGCATAAAACAACATAAGCTTC  
TGACTCTTACCTCCCTCTCTCCTACTCCTGCTCGCATCTGCTATAGTGGAGGCCGGAGCAGGAACAGGTTGAACAGTCTA  
CCCTCCCTTAGCAGGGAACACTCCCACCCTGGAGCCTCC  
GTAGACCTAACCATCTTCTCCTTACACCTAGCAGGTGTCTCCTCTATCTTAGGGGCCATCAATTTTCATCACAACAATTAT  
CAATATAAAAACCCCTGCCATAACCCAATACCAAACGCC  
CTCTTCGTCTGATCCGTCTAATCACAGCAGTCTACTTCTCCTATCTCTCCAGTCTTAGCTGCTGGCATCACTATACT  
ACTAACAGACCGCAACCTCAACACCACCTTCTTCGACCCC  
GCCGGAGGAGGAGACCCATTCTATACCAACACCTATTCTGATTTTTTCGGTACCCTGAAGTTTATATTCTTATCCTACC  
AGGCTTCGGAATAATCTCCCATATTGTAACCTTACTACTCC  
GGAAAAAAGAACCATTTGGATACATAGGTATGGTCTGAGCTATGATATCAATTGGCTTCCTAGGGTTTTATCGTGTGAGC  
ACACCATATATTTACAGTAGGAATAGACGTAGACACACGA  
GCATATTTACCTCCGCTACCATAATCATCGCTATCCCCACCGCGTCAAAGTATTTAGCTGACTCGCCACACTCCACGG  
AAGCAATATGAAATGATCTGCTGCAGTGTCTGAGCCCTA  
GGATTCATCTTTCTTTTACCCTAGGTGGCCTGACTGGCATTGTATTAGCAAACCTCATCACTAGACATCGTACTACACGA  
CACGTACTACGTTGTAGCTCACTTCCACTATGTCCTATCA  
ATAGGAGCTGTATTTGCCATCATAGGAGGCTTCATTCCTGATTTCCCTATTCTCAGGCTACACCCTAGACCAAACCTA  
CGCCAAAATCCATTTCACTATCATATTCATCGGCGTAAAT  
CTAACTTTCTTCCACAACACTTTCTCGGCCTATCCGGAATGCCCGACGTTACTCAGACTACCCCGATGCATACACCAC  
ATGAAACATCCTATCATCTGTAGGCTCATTCACTTTCTCTA  
ACAGCAGTAATATTAATAATTTTCATGATTTGAGAAGCCTTCGCTTCGAAGCGAAAAGTCTAATAGTAGAAGAACCCTC  
CATAAACCTGGAGTGACTATATGGATGCCCCCACCCTAC  
CACACATTCGAAGAACCCTGATACATAAAAATCTAGACAAAAAGGAAGGAATCGAACCCCCCAAAGCTGGTTTTCAAGCCA  
ACCCCATGGCCTCCATGACTTTTTTCAAAAAGGTATTAGAA  
AAACCATTTCAATAACTTTGTCAAAGTTAAATTATAGGCTAAATCCTATATATCTTAATGGCACATGCAGCGCAAGTAGGT  
CTACAAGACGCTACTTCCCCTATCATAGAAGAGCTTATCA  
CCTTTTCATGATCACGCCCTCATAATCATTTTTCTTATCTGCTTCTTAGTCTGTATGCCCTTTTCTAACACTCACAACA  
AAACTAACTAATACTAACATCTCAGACGCTCAGGAAATGG  
AAACCGTCTGAACTATCCTGCCCGCCATCATCCTAGTCTCATCGCCCTCCCATCCCTACGCATCCTTTACATAACAGAC  
GAGGTCAACGATCCCTCCCTTACCATCAAATCAATTGGCC  
ACCAATGGTACTGAACCTACGAGTACACCGACTACGGCGGACTAATCTTCAACTCCTACATACTTCCCCATTATTCTTA  
GAACCAGGCGACCTGCGACTCCTTGACGTTGACAATCGAG  
TAGTACTCCCGATTGAAGCCCCCATTTCGTATAATAATTACATCACAAGACGTCTTGCCTCATGAGCTGTCCCCACATTA  
GGCTTAAAAACAGATGCAATTCGCGGACGTCTAAACCAA  
CCACTTTACCGCTACACGACCGGGGTATACTACGGTCAATGCTCTGAAATCTGTGGAGCAAACCACAGTTTTCATGCC  
ATCGTCTAGAATTAATTCCTTAAAAATCTTTGAAATAG  
GGCCCGTATTTACCCTATAGCACCCCTCTACCCCTCTAGAGCCACTGTAAAGCTAATTTAGCATTAACTTTTAAGT  
TAAAGATTAAGAGAACCAACACCTCTTTACAGTGAAATGC  
CCCAACTAAATACTACCGTATGGCCACCATAATTACCCCATACTCCTTACACTATTCTCATCACCCAACCTAAAAATA  
TTAAACACAAACTACCACCTACCTCCCTCACCAAAGCCCA  
TAAAAATAAAAAATTATAACAAACCCTGAGAACCAAAATGAACGAAAATCTGTTTCGCTTCATTATTGCCCCACAATCC  
TAGGCCTACCCGCCGAGTACTGATCATTCTATTTCCCC  
TCTATTGATCCCCACCTCCAAATATCTCATCAACAACCGACTAATCACCACCAACAATGACTAATCAAACCTAACCTCAA  
AACAAATGATAACCATACACAACACTAAAGGACGAACCTG  
ATCTCTTATACTAGTATCCTTAATCATTTTTATTGCCACAACCTCCTCGGACTCCTGCCTCACTCATTTTACACCAA  
CCACCAACTATCTATAACCTAGCCATGGCCATCCCCTT  
ATGAGCGGGCGAGTGATTATAGGCTTTTCGCTCTAAGATTAATAATGCCCTAGCCACTTCTTACCACAAGGCACACCTA  
CACCCCTTATCCCATACTAGTTATTATCGAAACCATCAG  
CCTACTCATTCAACCAATAGCCCTGGCCGTACGCCTAACCGCTAACATTACTGCAGGCCACCTACTCATGCACCTAATTG  
GAAGCGCCACCCTAGCAATATCAACCATTAACCTTCCCTC  
TACTTATCATCTTACAATTTAATTTACTGACTATCCTAGAAATCGCTGTGCCTTAATCCAAGCCTACGTTTTCA  
CACTTCTAGTAAGCCTCTACCTGCACGACAACACATAATG

ACCCACCAATCACATGCCTATCATATAGTAAAACCCAGCCCATGACCCCTAACAGGGGCCCTCTCAGCCCTCCTAATGAC  
CTCCGGCCTAGCCATGTGATTTCACTTCCACTCCATAACG  
CTCCTCATACTAGGCCTACTAACCAACACACTAACCATATACCAATGATGGCGGATGTAACACGAGAAAGCACATACCA  
AGGCCACCACACCACCTGTCCAAAAAGGCCTTCGATAC  
GGGATAATCCTATTTATTACCTCAGAAATTTTTTTCTTCGCAGGATTTTTCTGAGCCTTTTACCCTCCAGCCTAGCCCC  
TACCCCCCAATTAGGAGGGCACTGGCCCCAACAGGCATC  
ACCCCGCTAAATCCCCTAGAAGTCCCCTCCTAAACACATCCGTATTACTCGCATCAGGAGTATCAATCACCTGAGCTCA  
CCATAGTCTAATAGAAAAACAACCGAAACCAAATAATTCAA  
GCACTGCTTATTACAATTTTACTGGGTCTCTATTTTACCCTCCTACAAGCCTCAGAGTACTTCGAGTCTCCCTTCACCAT  
TTCCGACGGCATCTACGGCTCAACATTTTTGTAGCCACA  
GGCTTCCACGGACTTCACGTCAATTATTGGCTCAACTTTCCTCACTATCTGCTTCATCCGCCAACTAATATTTCACTTTAC  
ATCCAAACATCACTTTGGCTTCGAAGCCCGCCCTGATAC  
TGGCATTGTTGATAGTGGTTTACTATTTCTGTATGTCTCCATCTATTGATGAGGGTCTTACTCTTTTAGTATAAATAG  
TACCGTTAACTTCCAATTAAGTATTTTGGACAACATTCAA  
AAAAGAGTAATAAACTTCGCCTTAATTTTAAATAATCAACACCCTCCTAGCCTTACTACTAATAATTATTACATTTTACT  
ACCACAACCTCAACGGCTACATAGAAAAATCCACCCCTTAC  
GAGTGC GGCTTCGACCCTATATCCCCCGCCCGCTCCCTTTCTCCATAAAATTCTTCTTAGTAGCTATTACCTTCTTATT  
ATTTGATCTAGAAATTGCCCTCCTTTTACCCTACCATGA  
GCCCTACAAACAACCTAACCCTGCCACTAATAGTTATGTATCCCTCTTATTAATCATCATCCTAGCCCTAAGTCTGGCCTA  
TGAGTGACTACAAAAGGATTAGACTGAACCGAATTGGTA  
TATAGTTTAAACAAAACGAATGATTTTCGACTCATTAAATTATGATAATCATATTTACCAAATGCCCTCATTACATAAA  
TATTATACTAGCATTTACCATCTCACTTCTAGGAATACTA  
GTATATCGCTCACACCTCATATCCTCCCTACTATGCCTAGAAGGAATAATACTATCGCTGTTTATTATAGCTACTCTCAT  
AACCTCAACACCCACTCCCTCTTAGCCAATATTGTGCCT  
ATTGCCATACTAGTCTTTGCCGCCTGCGAAGCAGCGGTGGGCCTAGCCCTACTAGTCTCAATCTCCAACACATATGGCCT  
AGACTACGTACATAACCTAAACCTACTCCAATGCTAAAAC  
TAATCGTCCCAACAATTATATTACTACCCTGACATGACTTTCCAAAAACACATAATTTGAATCAACACAACCACCCAC  
AGCCTAATTATTAGCATCATCCCTCTACTATTTTTAACC  
AAATCAACAACAACCTATTTAGCTGTTCCCAACCTTTTCTCCGACCCCTAACAACCCCTCCTAATACTAACTACC  
TGACTCCTACCCCTCACAATCATGGCAAGCCAACGCCACT  
TATCCAGTGAACCACTATCACGAAAAAACTCTACCTCTCTATACTAATCTCCCTACAAATCTCCTTAATTATAACATTC  
ACAGCCACAGAATAATCATATTTTTATATCTTCTTCGAAA  
CCACACTTATCCCCACCTTGGCTATCATCACCCGATGAGGCAACCAGTCAGAACGCCTGAACGCAGGCACATACTTCCTA  
TTCTACACCCTAGTAGGCTCCCTTCCCCTACTCATCGCAC  
TAATTTACTACTCACAACACCCTAGGCTCACTAAACATTCTACTACTACTCTACTGCCAAGAACTATCAAACCTCCTGA  
GCCAACAACCTTAATATGACTAGCTTACACAATAGCTTTTTA  
TAGTAAAGATACCTCTTTACGGACTCCACTTATGACTCCCTAAAGCCCATGTGCAAGCCCCCATCGCTGGGTCAATAGTA  
CTTGCCGCGACTCTTTGAAACTAGGCGGCTATGGTATAA  
TACGCCTCACACTCATTCTCAACCCCTGACAAAACACATAGCCTACCCCTTCTTGTACTATCCCTATGAGGCATAATT  
ATAACAAGCTCCATCTGCCTACGACAAACAGACCTAAAAT  
CGCTCATTGCATACTCTTCAATCAGCCACATAGCCCTCGTAGTAACAGCCATTCTCATCCAAACCCCTGAAGCTTACC  
GGCGCAGTCACTTCTCATAATCGCCCACGGACTTACATCCT  
CATTACTATTCTGCCTAGCAAACCTCAAACCTACGAACGCCTCACAGTCGCATCATAATCCTCTCTCAAGGACTTCAAACCT  
CTACTCCCACTAATAGCTTTTTGATGACTTCTAGCAAGCC  
TCGCTAACCTCGCCTTACCCCCACTATTAACCTACTGGGAGAACTCTCTGTGCTAGTAACCACGTTCTCCTGATCAAAT  
ATCACTCTCTACTTACAGGACTCAACATACTAGTCACAG  
CCCTATACTCCCTCTACATATTTACCACAACAATGGGGCTCACTCACCCACCACATTAACAACATAAAACCCCTCATT  
ACACGAGAAAAACCCCTCATGTTTACATACCTATCCCCA  
TTCTCCTCTATCCCTCAACCCCGACATCATTACCGGGTTTTCTCTTGTAAATATAGTTTTAACCAAAACATCAGATTGT  
GAATCTGACAACAGAGGCTTACGACCCCTTATTTACCGAG  
AAAGCTCACAAGAAGTCTAATCATGCCCCCATGTCTAACAACATGGCTTTCTCAACTTTTTAAAGGATAACAGCTATCC  
ATTGGTCTTAGGCCCAAGAATTTTGGTGCAACTCCAAAT  
AAAAGTAATAACCATGCACACTACTATAACCACCCTAACCTAACCTTCCCTAATTCCCCCATCCTTACCACCCTCGTTA  
ACCCTAACAAAAAAACTCATACCCCAATTATGTAAAATC  
CATTGTGCATCCACCTTTATTATCAGTCTCTTCCCCACAACAATATTATCATGTGCCTAGACCAAGAAGTTATTATCTCGA  
ACTGACACTGAGCCACAACCCAAACAACCCAGCTCTCCCT

AAGCTTCAAACCTAGACTACTTCTCCATAATATTCATCCCTGTAGCATTGTTTCGTTACATGGTCCATCATAGAATTCTCAC  
TGTGATATATAAACTCAGACCCAAACATTAATCAGTTCTT  
CAAATATCTACTCATCTTCTTAATTACCATACTAATCTTAGTTACCGCTAACAACTATTCCAAGTTCATCGGCTGAG  
AGGGCGTAGGAATTATATCCTTCTTGCTCATCAGTTGATG  
ATACGCCCAGCAGATGCCAACACAGCAGCCATTCAAGCAATCCTATACAACCGTATCGGCGATATCGGTTTCATCCTCG  
CCTTAGCATGATTTATCCTACACTCCAACCTCATGAGACCC  
ACAACAAATAGCCCTTCTAAACGCTAATCCAAGCCTCACCCCACTACTAGGCCTCCTCCTAGCAGCAGCAGGCAAATCAG  
CCCAATTAGGTCTCCACCCCTGACTCCCCTCAGCCATAGA  
AGGCCCCACCCAGTCTCAGCCCTACTCCACTCAAGCACTATAGTTGTAGCAGGAATCTTCTTACTCATCCGCTTCCACC  
CCCTAGCAGAAAATAGCCCACTAATCCAAACTCTAACACT  
ATGCTTAGGCGCTATCACCCTCTGTTTCGAGCAGTCTGCGCCCTTACACAAAATGACATCAAAAAAATCGTAGCCTTCT  
CCACTTCAAGTCAACTAGGACTATAATAGTTACAATCGG  
CATCAACCAACCACACCTAGCATTCTGCACATCTGTACCCACGCCTTCTTCAAAGCCATACTATTTATGTGCTCCGGGT  
CCATCATCCACAACCTTAAACAATGAACAAGATATTCGAAA  
AATAGGAGGACTACTCAAACCATACCTCTCACTTCAACCTCCCTCACCATTTGGCAGCCTAGCATTAGCAGGAATACCTT  
TCCTCACAGGTTTCTACTCCAAAGACCACATCATCGAAAAC  
CGCAAACATATCATAACAAACGCCTGAGCCCTATCTATTACTCTCATCGCTACCTCCCTGACAAGCGCCTATAGCACTC  
GAATAATCCTTCTCACCCCTAACAGGTCAACCTCGCTTCCC  
CACCCCTTACTAACATTAACGAAAATAACCCCACTACTAAACCCCATTAACGCCTGGCAGCCGGAAGCCTATTTCGCAG  
GATTTCTCATTACTAACAACATTTCCCCCGCATCCCCCTT  
CCAAACAACAATCCCCCTTACCTAAAACCTCACAGCCCTCGCTGTCACTTTCTTAGGACTTCTAACAGCCCTAGACCTCA  
ACTACCTAACCAACAACTTAAAATAAAAATCCCCACTATG  
CACATTTTATTTCTCCAACATACTCGGATTCTACCCTAGCATCACACACCCGCACAATCCCCTATCTAGGCCTTCTTACGA  
GCCAAAACCTGCCCCCTACTCCTCCTAGACCTAACCTGACT  
AGAAAAGCTATTACCTAAAACAATTTACAGCACCAAATCTCCACCTCCATCATCACCTCAACCCAAAAAGGCATAATTA  
AACTTTACTTCTCTCTTTCTTCTTCCCCTCATCCTAAC  
CCTACTCCTAATCACATAACCTATTCCCCGAGCAATCTCAATTACAATATACACACCAACAAACAATGTTCAACCAGTA  
ACTACTACTAATCAACGCCCATATAATCATACAAAGCCCCCG  
CACCAATAGGATCCTCCCGAATCAACCCCTGACCCCTCTCCTTATAAATTATTAGCTTCTTACTACTATTAAAGTTTACC  
ACAACCACCACCCCATCATACTCTTTTCCCCACAGCACCA  
ATCCTACCTCCATCGCTAACCCCACTAAAACACTCACCAAGACCTCAACCCCTGACCCCATGCCTCAGGATACTCCTCA  
ATAGCCATCGCTGTAGTATATCCAAAGACAACCATCATT  
CCCCTAAATAAATTAATAAACTATTAAACCCATATAACCTCCCCAAAATTGAGAATAATAACACACCCGACCACACCG  
CTAACAAATCAATACTAAACCCCATAAATAGGAGAAGGCT  
TAGAAGAAAACCCCAACACCCCACTTAAACCCCACTCAACAGAAAACAAAGCATAACATCATTATTCTCGCACGGACT  
ACAACCACGACCAATGATATGAAAAACCATCGTTGTATTT  
CAACTACAAGAACACCAATGACCCCAATACGAAAATTAACCCCTAATAAAAATTAATTAACCACTCATTATCATCGACCTC  
CCCACCCCATCCAACATCTCCGCATGATGAAACTTCGGCT  
CACTCCTTGGCGCCTGCCTGATCCTCAAATCACACAGGACTATTCTTAGCCATGCACTACTCACAGACGCCTCAACC  
GCCTTTTTCATCAATCGCCACATCACTCGAGACGTAAATT  
ATGGCTGAATCATCCGCTACCTTACGCCAATGGCGCCTCAATATTCTTTATCTGCCTCTTCTTACACATCGGGCGAGGC  
CTATATTACGGATCATTTCTCTACTCAGAAACCTGAAACA  
TCGGCATTATCCTCCTGCTTGCAACTATAGCAACAGCCTTCATAGGCTATGTCTCCCGTGAGGCCAAATATCATTCTGA  
GGGGCCACAGTAATTACAACTTACTATCCGCCATCCCAT  
ACATTGGGACAGACCTAGTTCAATGAATCTGAGGAGGCTACTCAGTAGACAGTCCCACCCTCACACGATTCTTTACCTTT  
CACTTCATCTTGCCCTTCAATATTGCAGCCCTAGCAGCAC  
TCCACCTCCTATTCTTGACAGAAACGGGATCAAACAACCCCTAGGAATCACCTCCCATTCCGATAAAATCACCTTCCAC  
CCTTACTACACAATCAAAGACGCCCTCGGCTTACTTCTCT  
TCCTTCTCTCCTTAATGACATTAACACTATTCTCACCAGACCTCCTAGGCGACCCAGACAATTATACCCTAGCCAACCC  
TTAAACACCCCTCCCCACATCAAGCCCGAATGATATTTCC  
TATTGCCTACACAATTCTCCGATCCGTCCCTAACAACTAGGAGGCGTCTTGCCTTACTACTATCCATCCTCATCCTA  
GCAATAATCCCCATCCTCCATATATCCAAACAACAAAGCA  
TAATATTTGCCCCACTAAGCCAATCACTTTTATTGACTCCTAGCCGAGACCTCCTCATTCTAACCTGAATCGGAGGACAA  
CCAGTAAGCTACCCTTTTACCATCATTGGACAAGTAGCAT  
CCGTAATACTTACAACAATCCTAATCCTAATACCAACTATCTCCCTAATTGAAAACAAAATACTCAAATGGGCCTGT  
CCTTGTAGTATAAACTAATACACCAGTCTTGTAACCGGA

GATGAAAACCTTTTTCCAAGGACAAATCAGAGAAAAAGTCTTTAACTCCACCATTAGCACCCAAAGCTAAGATTCTAATT  
TAAACTATT

#EUROPE Saami

CCACAGTTTATGTAGCTTACCTCCTCAAAGCAATACACTGAAAATGTTTGTAGACGGGCTCACATCACCCCATAAACAAATA  
GGTTTGGTCTAGCCTTTCTATTAGCTCTTAGTAAGATTA  
CACATGCAAGCATCCCCGTTCCAGTGAGTTCACCTCTAAATCACCACGATCAAAGGGACAAGCATCAAGCACGCAGCA  
ATGCAGCTCAAACGCTTAGCCTAGCCACACCCCCACGGG  
AAACAGCAGTGATTAACCTTTAGCAATAAACGAAAGTTTAACTAAGCTATACTAACCACAGGGTTGGTCAATTTCTGTGCC  
AGCCACCGCGGTACACGATTAACCCAAGTCAATAGAAGC  
CGGCGTAAAGAGTGTTTTAGATCACCCCTCCCCAATAAAGCTAAAACCTCACCTGAGTTGTAAAAAACTCCAGTTGACAC  
AAAATAGACTACGAAAGTGGCTTTAACATATCTGAACACA  
CAATAGCTAAGACCCAAACTGGGATTAGATACCCCACTATGCTTAGCCCTAAACCTCAACAGTTAAATCAACAAAACCTGC  
TCGCCAGAACACTACGAGCCACAGCTTAAAACCTCAAAGGA  
CCTGGCGGTGCTTCATATCCCTCTAGAGGAGCCTGTTCTGTAATCGATAAACCCCGATCAACCTCACACCTCTTGCTCA  
GCCTATATACCGCCATCTTCAGCAAACCCTGATGAAGGCT  
ACAAAGTAAGCGCAAGTACCCACGTAAAGACGTTAGGTCAAGGTGTAGCCCATGAGGTGGCAAGAAATGGGCTACATTTT  
CTACCCAGAAAACCTACGATAGCCCTTATGAAACTTAAGG  
GTCGAAGGTGGATTTAGCAGTAAACTGAGAGTAGAGTGCTTAGTTGAACAGGGCCCTGAAGCGGTACACACCGCCCGTC  
ACCCTCCTCAAGTATACTTCAAAGGACATTTAACTAAAAC  
CCCTACGCATTTATATAGAGGAGACAAGTCGTAACATGGTAAGTGTACTGGAAAGTGCACCTTGACGAACCAGAGTGTAG  
CTTAACACAAAGCACCCAACTTACACTTAGGAGATTTCAA  
CTTAACCTTGACCGCTCTGAGCTAAACCTAGCCCCAAACCCACTCCACCTTACTACCAGACAACCTTAGCCAAACCATTTA  
CCCAAATAAAGTATAGGCGATAGAAATTGAAACCTGGCGC  
AATAGATATAGTACCGCAAGGGAAAGATGAAAAATTATAACCAAGCATAATATAGCAAGGACTAACCCCTATACCTTCTG  
CATAATGAATTAAGTAAATAAATTTGCAAGGAGAGCCA  
AAGCTAAGACCCCGAAACCAGACGAGCTACCTAAGAACAGCTAAAAGAGCACACCCGTCTATGTAGCAAAAATAGTGGGA  
AGATTTATAGGTAGAGGGCAGAAAACCTACCGAGCCTGGTG  
ATAGCTGGTTGTCCAAGATAGAATCTTAGTTCAACTTTAAATTTGCCACAGAACCCTCTAAATCCCCTTGTAATTTAA  
CTGTTAGTCCAAGAGGAACAGCTCTTTGGACACTAGGAA  
AAAACCTTGTAGAGAGAGTAAAAAA-  
TTTTAACCCCATAGTAGGCCTAAAAGCAGCCACCAATTAAGAAAGCGTTCAAGCTCAACACCCACTACCTAAAAAA-  
TCCCAAACATATAACTG  
AACTCCTCACACCCAATTGGACCAATCTATCACCTATAGAAGAATAATGTTAGTATAAGTAACATGAAAACATTCTCC  
TCCGCATAAGCCTGCGTCAGATTAAAAACACTGAACTGACA  
ATTAACAGCCCAATATCTACAATCAACCAACAAGTCATTATTACCCTCACTGTCAACCCAACACAGGCATGCTCATAAGG  
AAAGGTTAAAAAAGTAAAAGGAACCTCGGCAAATCTTACC  
CCGCCTGTTTACCAAAAACATCACCTCTAGCATCACAGTATTAGAGGCACCGCCTGCCAGTGACACATGTTTAAACGGC  
CGCGGTACCCTAACCGTGCAAAGGTAGCATAATCACTTGT  
TCCTTAAATAGGGACCTGTATGAATGGCTCCACGAGGGTTGAGCTGTCTCTTACTTTTAAACCAGTGAAATTGACCTGCC  
GTGAAGAGGGCGGCATGACACAGCAAGACGAGAAGACCT  
ATGGAGCTTTAATTTATTAATGCAAACAGTACCTAACAAACCCACAGGTCTTAACTACCAAACCTGCATTAATAAATTTCC  
GGTTGGGGCGACCTCGGAGCAGAACCAACCTCCGAGCAG  
TACATGCTAAGACTTCACCAGTCAAAGCGAACTACTATACTCAATTGATCCAATAACTTGACCAACGGAACAAGTTACCC  
TAGGGATAACAGCGCAATCCTATTCTAGAGTCCATATCAA  
CAATAGGGTTTACGACCTCGATGTTGGATCAGGACATCCCGATGGTGCAGCCGCTATTAAAGGTTGTTTTGTTCAACGAT  
TAAAGTCTACGTGATCTGAGTTCAGACCGGAGTAATCCA  
GGTCGGTTTCTATCTACTTCAAATTCCTCCCTGTACGAAAGGACAAGAGAAATAAGGCCTACTTCACAAAGCGCCTTCCC  
CCGTAAATGATATCATCTCAACTTAGTATTATACCCACAC  
CCACCCAAGAACAGGGTTTTGTTAAGATGGCAGAGCCCGGTAATCGCATAAAAACCTTAAAACCTTTACAGTCAGAGGTTCAAT  
TCCTCTTCTTAAACAACATAACCCATGGCCAACCTCCTACTC  
CTCATTGTACCCATTCTAATCGCAATGGCATTCCCTAATGCTTACCGAACGAAAAATTCTAGGCTATATACAACCTACGCAA  
AGGCCCAACGTTGTAGGCCCTACGGGCTACTACAACCC  
TTGCTGACGCCATAAAAACCTTTCACCAAAGAGCCCTAAAACCCGCCACATCTACCATCACCTCTACATCACCGCCCC  
GACCTTAGCTCTCACCATTTGCTCTTCTACTATGAACCCCC  
CTCCCCATACCAACCCCTGGTCAACCTCAACCTAGGCCTCCTATTTATTCTAGCCACCTCTAGCCTAGCCGTTTACTC  
AATCCTCTGATCAGGGTGGACATCAAACCTCAAACCTACGCC

CTGATCGGGCGACTGCGAGCAGTAGCCCAAACAATCTCATATGAAGTCACCCTAGCCATCATTCTACTATCAACATTACT  
AATAAGTGGCTCCTTTAACCTCTCCACCCTTATCACAACA  
CAAGAACACCTCTGATTACTCCTGCCATCATGACCCTTGGCCATAATATGATTTATCTCCACACTAGCAGAGACCAACCG  
AACCCCTTCGACCTTGCCGAAGGGGAGTCCGAAGTAGTC  
TCAGGCTTCAACATCGAATACGCCGAGGCCCTTCGCCCTATTCTTCATAGCCGAATACACAAACATTATTATAATAAA  
CACCCCTACCCTACAATCTTCTAGGAACAACATATGAC  
GCACTCTCCCCTGAACTCTACACAACATATTTTGTACCAAGACCCTACTTCTAACCTCCCTGTTCTTATGAATTGAAAC  
AGCATACCCCGATTCCGCTACGACCAACTCATAACCTC  
CTATGAAAAAATTCCTACCCTACCCTAGCATTACTTATATGATATGTCTCCATAACCATTACAATCTCCAGCATTCC  
CCCTCAAACCTAAGAAATATGTCTGATAAAAGAGTTACTT  
TGATAGAGTAAATAATAGGAGCTTAAACCCCTTATTTCTAGGACTATGAGAATCGAACCCATCCCTGAGAATCCAAAAT  
TCTCCGTGCCACCTATCACACCCCATCCTAAAGTAAGGTC  
AGCTAAATAAGCTATCGGGCCATACCCCGAAAATGTTGGTTATACCCTTCCCGTACTAATTAATCCCCTGGCCCAACCC  
GTCATCTACTCTACCATCTTTGCAGGCACACTCATCACAG  
CGCTAAGCTCGCACTGATTTTTTACCTGAGTAGGCCTAGAAATAAACATACTAGCTTTTTATTCCAGTTCTAACCAAAAA  
ATAAACCCCTCGTTCCACAGAAGCTGCCATCAAGTATTTCC  
TCACGCAAGCAACCGCATCCATAATCCTTCTAATAGCTATCCTCTTCAACAATATACTCTCCGGACAATGAACCATAACC  
AATACTACCAATCAATACTCATCATTATAATAATCATAATGG  
CTATAGCAATAAAACTAGGAATAGCCCCCTTTCCTTCTGAGTCCCAGAGGTTACCCAAGGCACCCCTCTGACATCCGGC  
CTGCTTCTTCTCATATGACAAAAACTAGCCCCCATCTCAA  
TCATATACCAAATCTCTCCCTCACTAAACGTAAGCCTTCTCCTCACTCTCTCAATCTTATCCATCATAGCAGGCAGTTGA  
GGTGGATTAAACCAAACCCAGCTACGCAAAATCTTAGCAT  
ACTCCTCAATTACCCACATAGGATGAATAATAGCAGTTCTACCGTACAACCCTAACATAACCATTCTTAATTTAACTATT  
TATATTATCCTAACTACTACCGCATTCTACTACTCAACT  
TAAACTCCAGCACCACGACCCTACTACTATCTCGCACCTGAAACAAGCTAACATGACTAACACCCTTAATTCCATCCACC  
CTCCTCTCCCTAGGAGGCCTGCCCCGCTAACCGGCTTTT  
TGCCCAAATGGGCCATTATCGAAGAATTCACAAAAACAATAGCCTCATCATCCCCACCATCATAGCCACCATCACCCCTC  
CTTAACCTCTACTTCTACCTACGCCTAATCTACTCCACCT  
CAATCACACTACTCCCCATATCTAACAACGTAATAAAATGACAGTTTGAACATACAAAACCCACCCCATTCCTCCCC  
ACACTCATCGCCCTTACCACGCTACTCCTACCTATCTCCC  
CTTTTATACTAATAATCTTATAGAAATTTAGGTTAAATACAGACCAAGAGCCTTCAAAGCCCTCAGTAAGTTGCAATACT  
TAATTTCTGTAACAGCTAAGGACTGCAAAAACCCACTCTG  
CATCAACTGAACGCAATCAGCCACTTTAATTAAGCTAAGCCCTTACTAGACCAATGGGACTTAAACCCACAAACACTTA  
GTTAACAGCTAAGCACCCCTAATCAACTGGCTTCAATCTAC  
TTCTCCCGCCGCGGGAAAAAAGGCGGGAGAAGCCCGGCAGGTTTGAAGCTGCTTCTTCGAATTTGCAATTTCAATATGA  
AAATCACCTCGGAGCTGGTAAAAAGAGGCCTAACCCCTGT  
CTTTAGATTTACAGTCCAATGCTTCACTCAGCCATTTTACCTCACCCCT-  
ACTGATGTTCCGCCGACCGTTGACTATTCTCTACAAACCACAAAGACATTGGAACACTATACTATTATTC  
GGCGCATGAGCTGGAGTCTTAGGCACAGCTCTAAGCCTCCTTATTCGAGCCGAGCTGGGCCAGCCAGGCAACCTTCTAGG  
TAACGACCACATCTACAACGTTATCGTACAGCCCATGCA  
TTTGTAATAATCTTCTTCATAGTAATACCCATCATAATCGGAGGCTTTGGCAACTGACTAGTTCCCTAATAATCGGTGC  
CCCCGATATGGCGTTTCCCCGCATAAACAACATAAGCTTC  
TGACTCTTACCTCCCTCTCTCCTACTCCTGCTCGCATCTGCTATAGTGGAGGCCGGAGCAGGAACAGGTTGAACAGTCTA  
CCCTCCCTTAGCAGGGAACCTACTCCACCCTGGAGCCTCC  
GTAGACCTAACCATCTTCTCCTTACACCTAGCAGGTGTCTCCTCTATCTTAGGGGCCATCAATTTTCATCACAACAATTAT  
CAATATAAAAACCCCTGCCATAACCCAATACCAAACGCCC  
CTCTTCGTCTGATCCGTCTAATCACAGCAGTCTACTTCTCCTATCTCTCCAGTCTTAGCTGCTGGCATCACTATACT  
ACTAACAGACCGCAACCTCAACACCACCTTCTTCGACCCC  
GCCGGAGGAGGAGACCCATTCTATACCAACACCTATTCTGATTTTTTCGGTACCCTGAAGTTTATATTCTTATCCTACC  
AGGCTTCCGAATAATCTCCCATATTGTAACCTTACTACTCC  
GGAAAAAAGAACCATTTGGATACATAGGTATGGTCTGAGCTATGATATCAATTGGCTTCCCTAGGGTTTATCGTGTGAGC  
ACACCATATATTTACAGTAGGAATAGACGTAGACACACGA  
GCATATTTACCTCCGCTACCATAATCATCGCTATCCCCACCGCGTCAAAGTATTTAGCTGACTCGCCACACTCCACGG  
AAGCAATATGAAATGATCTGCTGCAGTGTCTGAGCCCTA  
GGATTCATCTTTCTTTTACCCTAGGTGGCCTGACTGGCATTGTATTAGCAAACCTCATCACTAGACATCGTACTACACGA  
CACGTACTACGTTGTAGCTCACTTCCACTATGTCTATCA

ATAGGAGCTGTATTTGCCATCATAGGAGGCTTCATTCACTGATTTCCCTATTCTCAGGCTACACCCTAGACCAAACCTA  
CGCCAAAATCCATTTCACTATCATATTCATCGGCGTAAAT  
CTAACTTTCTTCCCACAACACTTTCTCGGCCTATCCGGAATGCCCCGACGTTACTCGGACTACCCCGATGCATACACCAC  
ATGAAACATCCTATCATCTGTAGGCTCATTCAATTTCTCTA  
ACAGCAGTAATATTAATAATTTTCATGATTTGAGAAGCCTTCGCTTCGAAGCGAAAAGTCCTAATAGTAGAAGAACCCTC  
CATAAACCTGGAGTGACTATATGGATGCCCCCACCCTAC  
CACACATTCGAAGAACCCGTATACATAAAATCTAAACAAAAAGGAAGGAATCGAACCCCCAAAGCTGGTTTTCAAGCCA  
ACCCCATGGCCTCCATGACTTTTTTCAAAAAGGTATTAGAA  
AAACCATTTCATAACTTTGTCAAAGTTAAATTATAGGCTAAATCCTATATATCTTAATGGCACATGCAGCGCAAGTAGGT  
CTACAAGACGCTACTTCCCCTATCATAGAAGAGCTTATCA  
CCTTTTCATGATCAGGCCCTCATAATCATTTTCTTATCTGCTTCTTAGTCTGTATGCCCTTTTTCTAACACTCACAACA  
AAACTAACTAATACTAACATCTCAGACGCTCAGGAAATAG  
AAACCGTCTGAACTATCCTGCCCGCCATCATCCTAGTCTCATCGCCCTCCCATCCCTACGCATCCTTTACATAACAGAC  
GAGGTCAACGATCCCTCCCTTACCATCAAATCAATTGGCC  
ACCAATGGTACTGAACCTACGAGTACACCGACTACGGCGGACTAATCTTCAACTCCTACATACTTCCCCATTATTCTTA  
GAACCAGGCGACCTGCGACTCCTTGACGTTGACAATCGAG  
TAGTACTCCCGATTGAAGCCCCCATTTCGTATAATAATTACATCACAAGACGTCTTGCCTCATGAGCTGTCCCCACATTA  
GGCTTAAAAACAGATGCAATTCCCGGACGTCTAAACCAA  
CCACTTTACCGCTACACGACCGGGGTATACTACGGTCAATGCTCTGAAATCTGTGGAGCAAACCACAGTTTTCATGCC  
ATCGTCTAGAATTAATTCCCCTAAAAATCTTTGAAATAG  
GGCCCGTATTTACCCTATAGCACCCCTCTACCCCTCTAGAGCCCACTGTAAAGCTAAGCTTAGCATTAACTTTTTAAGT  
TAAAGATTAAGAGAACCAACACCTCTTTACAGTGAAATGC  
CCCAACTAAATACTACCGTATGGCCACCATAATTACCCCATACTCCTTACACTATTCTCATCACCCAATAAAAAATA  
TTAAACACAAACTACCACCTACCTCCCTCACCAAAGCCCA  
TAAAAATAAAAAATTATAACAAACCCTGAGAACCAAAATGAACGAAAATCTGTTTCGCTTCATTTCATTGCCCCCAATCC  
TAGGCCTACCCGCGCAGTACTGATCATTCTATTTCCCC  
TCTATTGATCCCCACCTCCAAATATCTCATCAACAACCGACTAATCACCACCAACAATGACTAATCAAACCTAACCTCAA  
AACAAATGATAACCATAACACAACACTAAAGGACGAACCTG  
ATCTCTTACTATAGTATCCTTAATCATTTTTATTGGCACAATAACCTCCTCGGACTCCTGCCTCACTCATTTACACCAA  
CCACCCAATACTATAAACCTAGCCATGGCCATCCCCTT  
ATGAGCGGGCGCAGTGATTATAGGCTTTTCGCTCTAAGATTAAAAATGCCCTAGCCCACTTCTTACCACAAGGCACACCTA  
CACCCCTTATCCCCATACTAGTTATTATCGAAACCATCAG  
CCTACTCATTCAACCAATAGCCCTGGCCGTACGCCTAACCGCTAACATTACTGCAGGCCACCTACTCATGCACCTAATTG  
GAAGCGCCACCCTAGCAATATCAACCATTAACCTTCCCTC  
TACACTTATCATCTTACAATTCTAATTCTACTGACTATCCTAGAAATCGCTGTGCCTTAATCCAAGCCTACGTTTTTCA  
CACTTCTAGTAAGCCTCTACCTGCACGACAACACATAATG  
ACCCACCAATCACATGCCTATCATATAGTAAAACCCAGCCCATGACCCCTAACAGGGGCCCTCTCAGCCCTCCTAATGAC  
CTCCGGCCTAGCCATGTGATTTCACTTCCACTCCATAACG  
CTCCTCATACTAGGCCTACTAACCAACACACTAACCATATACCAATGATGGCGGATGTAACACGAGAAAGCACATACCA  
AGGCCACCACACACCACCTGTCCAAAAGGCCTTCGATAC  
GGGATAATCCTATTTATTACCTCAGAAGTTTTTTTTCTTCGCAGGATTTTTCTGAGCCTTTTTACCCTCCAGCCTAGCCCC  
TACCCCAATTAGGAGGGCACTGGCCCCAACAGGCATC  
ACCCCGCTAAATCCCCTAGAAGTCCCCTCCTAAACACATCCGTATTACTCGCATCAGGAGTATCAATCACCTGAGCTCA  
CCATAGTCTAATAGAAAACAACCGAAACCAATAATTCAA  
GCACTGCTTATTACAATTTTACTGGGTCTCTATTTTACCCTCCTACAAGCCTCAGAGTACTTCGAGTCTCCCTTACCAT  
TTCCGACGGCATCTACGGCTCAACATTTTTTGTAGCCACA  
GGCTTCCACGGACTTCACGTCAATTTTGGCTCAACTTTCCTCACTATCTGCTTCATCCGCCAACTAATATTTCACTTTAC  
ATCCAAACATCACTTTGGCTTCGAAGCCGCCGCTGATAC  
TGGCATTGTTAGATGTGGTTGACTATTTCTGTATGTCTCCATCTATTGATGAGGGTCTTACTCTTTTAGTATAAATAG  
TACCGTTAACTTCCAATTAAGTATTTTGGACAACATTCAA  
AAAAGAGTAATAAACTTCGCCTTAATTTTAATAATCAACACCCTCCTAGCCTTACTACTAATAATTATTACATTTTACT  
ACCACAACCTCAACGGCTACATAGAAAAATCCACCCCTTAC  
GAGTGCGGCTTCGACCCTATATCCCCGCCCCGCTCCCTTTCTCCATAAAATTTCTTCTTAGTAGCTATTACCTTCTTATT  
ATTTGATCTAGAAATTGCCCTCCTTTTACCCTACCATGA  
GCCCTACAAACAATAACCTGCCACTAATAGTTATGTATCCCTCTTATTAATCATCATCCTAGCCCTAAGTCTGGCCTA  
TGAGTGACTACAAAAGGATTAGACTGAACCGAATTGGTA

TATAGTTTAAACAAAACGAATGATTTGCGACTCATTAAATTATGATAATCATATTTACCAAATGCCCTCATTACATAAA  
TATTATACTAGCATTTACCATCTCACTTCTAGGAATACTA  
GTATATCGCTCACACCTCATATCCTCCCTACTATGCCTAGAAGGAATAATACTATCGCTGTTTATTATAGCTACTCTCAT  
AACCTCAACACCCACTCCCTCTTAGCCAATATTGTGCCT  
ATTGCCATACTAGTCTTTGCCGCCTGCGAAGCAGCGGTGGGCTAGCCCTACTAGTCTCAATCTCCAACACATATGGCCT  
AGACTACGTACATAACCTAAACCTACTCCAATGCTAAAAC  
TAATCGTCCCAACAATTATATTACTACCACTGACATGACTTTCCAAAAACACATAATTTGAATCAACACAACCACCCAC  
AGCCTAATTATTAGCATCATCCCTCTACTATTTTTTAACC  
AAATCAACAACAACCTATTTAGCTGTTCCCAACCTTTTCTCCGACCCCTAACAACCCCTCCTAATACTAACTACC  
TGACTCCTACCCCTCACAATCATGGCAAGCCAACGCCACT  
TATCCAGTGAACCACTATCACGAAAAAACTCTACCTCTATACTAATCTCCCTACAAATCTCCTTAATTATAACATTC  
ACAGCCACAGAACTAATCATATTTTATATCTTCTTCGAAA  
CCACACTTATCCCCACCTTGGCTATCATCCCCGATGAGGCAACCAGCCAGAACGCCTGAACGCAGGCACATACTTCCTA  
TTCTACACCCTAGTAGGCTCCCTTCCCCTACTCATCGCAC  
TAATTTACACTCACAACACCCTAGGCTCACTAAACATTCTACTACTCACTCTCACTGCCAAGAACTATCAAACCTCCTGA  
GCCAACAACCTAATATGACTAGCTTACACAATAGCTTTTA  
TAGTAAAGATACCTCTTTACGGACTCCACTTATGACTCCCTAAAGCCCATGTGCAAGCCCCCATCGCTGGGTCAATAGTA  
CTTGCCGCGAGTACTCTTAAAACCTAGGCGGCTATGGTATAA  
TACGCCTCACACTCATTCTCAACCCCTGACAAAACACATAGCCTACCCCTTCTTGTACTATCCCTATGAGGCATAATT  
ATAACAAGCTCCATCTGCCTACGACAAACAGACCTAAAAT  
CGCTCATTGCATACTCTTCAATCAGCCACATAGCCCTCGTAGTAACAGCCATTCTCATCCAAACCCCTGAAGCTTACC  
GGCGCAGTCACTTCTATAATCGCCACGGGCTTACATCCT  
CATTACTATTCTGCCTAGCAAACCTCAAACCTACGAACGCCTCACAGTCGCATCATAATCCTCTCTCAAGGACTTCAAACCT  
CTACTCCCCTAATAGCTTTTTGATGACTTCTAGCAAGCC  
TCGCTAACCTCGCCTTACCCCTCACTATTAACCTACTGGGAGAACTCTCCGTGCTAGTAACCACGTTCTCCTGATCAAAT  
ATCACTCTCCTACTTACAGGACTCAACATACTAGTCACAG  
CCCTATACTCCCTCTACATATTTACCACAACACAATGGGGCTCACTCACCCACCACATTAACAACATAAAAACCCCTCATT  
ACACGAGAAAAACCCCTCATGTTTACACACCTATCCCCA  
TTCTCCTCCTATCCCTCAACCCCGACATCATTACCGGGTTTTCTCCTTGTAAATATAGTTTTAACCAAAACATCAGATTGT  
GAATCTGACAACAGAGGCTTACGACCCCTTATTTACCGAG  
AAAGCTCACAAGAAGTCTAACTCATGCCCCCATGTCTAACAACATGGCTTTCTCAACTTTTTAAAGGATAACAGCTATCC  
ATTGGTCTTAGGCCCAAAAATTTTGGTGCAACTCCAAAT  
AAAAGTAATAACCATGCACACTACTATAACCACCCTAACCTGACTTCCCTAATTTCCCCCATCCTTACCACCCTCGTTA  
ACCCTAACAAAAAAACTCATAACCCCTATTATGTAAAATC  
CATTGTGCATCCACCTTTATTATCAGTCTCTTCCCCACAACAATATTCATGTGCCTAGACCAAGAAGTTATTATCTCGA  
ACTGACACTGAGCCACAACCCAAACAACCCAGCTCTCCCT  
AAGCTTCAAACCTAGACTACTTCTCCATAATATTCATCCCTGTAGCATTGTTGTTACATGGTCCATCATAGAATTCTCAC  
TGTGATATATAAACTCAGACCCAAACATTAATCAGTTCTT  
CAAATATCTACTCATCTTCCCTAATTACCATACTAATCTTAGTTACCGCTAACAACTATTCCAACCTGTTTATCGGCTGAG  
AGGGCGTAGGAATTATATCCTTCTTGCTCATCAGTTGATG  
ATACGCCCCGAGCAGATGCCAACACAGCAGCCATTCAAGCAATCCTATACAACCGTATCGGCGATATCGGTTTTATCCTCG  
CCTTAGCATGATTTATCCTACTCCAACCTCATGAGACCC  
ACAACAATAGCCCTTCTAAACGCTAATCCAAGCCTCACCCACTACTAGGCCTCCTCCTAGCAGCAGCAGGCAAATCAG  
CCCAATTAGGTCTCCACCCCTGACTCCCCTCAGCCATAGA  
AGGCCCCACCCAGTCTCAGCCCTACTCCACTCAAGCACTATAGTTGTAGCAGGAATCTTCTTACTCATCCGCTTCCACC  
CCCTAGCAGAAAATAGCCCACTAATCCAAACTCTAACACT  
ATGCTTAGGCGCTATCACCCTCTGTTTCGAGCAGTCTGCGCCCTTACACAAAATGACATCAAAAAAATCGTAGCCTTCT  
CCACTTCAAGTCAACTAGGACTCATAATAGTTACAATCGG  
CATCAACCAACCACACTAGCATTCTGCACATCTGTACCCACGCCTTCTTCAAAGCCATACTATTTATGTGCTCCGGGT  
CCATCATCCACAACCTTAAACAATGAACAAGATATTCGAAA  
AATAGGAGGACTACTCAAACCATACCTCTCACTTCAACCTCCCTCACCATTTGGCAGCCTAGCATTAGCAGGAATACCTT  
TCCTCACAGGTTTTCTACTCCAAAGACCACATCATCGAAAC  
CGCAAACATATCATACACAAACGCCTGAGCCCTATCTATTACTCTCATCGCTACCTCCCTGACAAGCGCCTATAGCACTC  
GAATAATTCTTCTCACCCCTAACAGGTCAACCTCGCTTCCC  
CACCCCTACTAACATTAACGAAAATAACCCACCCCTACTAAACCCATTAACGCCTGGCAGCCGGAAGCCTATTTCGCAG  
GATTTCTCATTACTAACAACATTTCCCCCGCATCCCCCTT

CCAAACAACAATCCCCCTCTACCTAAAACCTCACAGCCCTCGCTGTCACTTTCTTAGGACTTCTAACAGCCCTAGACCTCA  
ACTACCTAACCAACAAACTTAAAATAAAATCCCCACTATG  
CACATTTTATTTTCTCCAACATACTCGGATTCTACCCTAGCATCACACACCCGCACAATCCCCTATCTAGGCCTTCTTACGA  
GCCAAAACCTGCCCTACTCCTCCTAGACCTAACCTGACT  
AGAAAAGCTATTACCTAAAACAATTTTACAGCACCAAATCTCCACCTCCATCATCACCTCAACCCAAAAAGGCATAATTA  
AACTTTATTTTCTCTCTTTTCTTTCCCACTCATCCTAAC  
CCTACTCCTAATCACATAACCTATTCCCCCGAGCAATCTCAATTACAATATATACACCAACAAACAATGTTCAACCAGTA  
ACTACTACTAATCAACGCCATAATCATACAAAGCCCCCG  
CACCAATAGGATCCTCCCGAATCAACCCTGACCCCTCTCCTTCATAAATTATTAGCTTCTTACACTATTAAGTTTACC  
ACAACCACCACCCCATCATACTCTTTCACCCACAGCACCA  
ATCTACTCTCCATCGTAAACCCCACTAAAACACTCACCAAGACCTCAACCCCTGACCCCATGCCTCAGGATACTCCTCA  
ATAGCCATCGCTGTAGTATATCCAAAGACAACCATCATT  
CCCCTAAATAAATTAAAAAAACTATTAACCCATATAACCTCCCCAAAATTGAGAATAATAACACACCCGACCACACCG  
CTAACAAATCAATACTAAACCCCATAAATAGGAGAAGGCT  
TAGAAGAAAACCCCAAAACCCCACTAAACCCACACTCAACAGAAAACAAAGCATAACATCATTATTCTCGCACGGACT  
ACAACCACGACCAATGATATGAAAAACCATCGTTGTATTT  
CAACTACAAGAACACCAATGACCCCAATACGAAAATTAACCCCTAATAAAATTAATTAACCACTCATTTCATCGACCTC  
CCCACCCCATCCAACATCTCCGCATGATGAAACTTCGGCT  
CACTCCTTGGCGCCTGCCTGATCCTCAAATCACCACAGGACTATTCTAGCCATGCACTACTCACCAGACGCCTCAACC  
GCCTTTTTCATCAATCGCCACATCACTCGAGACGTAAATT  
ATGGCTGAATCATCCGCTACCTTACGCAATGGCGCCTCAATATTCTTTATCTGCCTCTTCTACACATCGGGCGAGGC  
CTATATTACGGATCATTTCTCTACTCAGAAACCTGAAACA  
TCGGCATTATCCTCCTGCTTGAACCTATAGCAACAGCCTTCATAGGCTATGTCTCCCGTGAGGCCAAATATCATTCTGA  
GGGGCCACAGTAATTACAACTTACTATCCGCCATCCCAT  
ACATTGGGACAGACCTAGTTCAATGAATCTGAGGAGGCTACTCAGTAGACAGTCCCACCCTCACACGATTCTTTACCTTT  
CACTTCATCTTGCCTTTCATTATTGCAGCCCTAGCAGCAC  
TCCACCTCCTATTCTTGCACGAAACGGGATCAAACAACCCCTAGGAATCACCTCCCATTCCGATAAAATCACCTTCCAC  
CCTTACTACACAATCAAAGACGCCCTCGGCTTACTTCTCT  
TCCTTCTCTCCTTAATGACATTAACACTATTCTCACCAGACCTCCTAGGCGACCCAGACAATTATACCTAGCCAACCC  
TTAAACACCCCTCCCCACATCAAGCCCGAATGATATTTCC  
TATTGCCTACACAATTCTCCGATCCGTCCCTAACAAACTAGGAGGCGTCTTGCCTATTACTATCCATCCTCATCCTA  
GCAATAATCCCCATCCTCCATATATCCAAACAACAAAGCA  
TAATATTTGCGCCACTAAGCCAATCACTTTATTGACTCCTAGCCGACAGCCTCCTCATTCTAACCTGAATCGGAGGACAA  
CCAGTAAGCTACCCTTTTACCATCATTGGACAAGTAGCAT  
CCGTAATACTTACACAACATCCTAATCCTAATACCAACTATCTCCCTAATTGAAAACAAAATACTCAAATGGGCCTGT  
CCTTGTAAGTATAAATTAATACACCAGTCTTGTAACCGGA  
GATGAAAACCTTTTTCCAAGGACAAATCAGAGAAAAAGTCTTTAACTCCACCATTAGCACCCAAAGCTAAGATTCTAATT  
TAAACTATT

#EUROPE Tatar

CCACAGTTTATGTAGCTTACCCCTCAAAGCAATACACTGAAAATGTTTGTAGACGGGCTCACATCACCCCATAAACAAATA  
GGTTTGGTCTAGCCTTTCTATTAGCTCTTAGTAAGATTA  
CACATGCAAGCATCCCCGTTCCAGTGAGTTCACCCTCTAAATCACCACGATCAAAGGGACAAGCATCAAGCACGCAGCA  
ATGCAGCTCAAACGCTTAGCCTAGCCACACCCCCACGGG  
AAACAGCAGTGATTAACCTTTAGCAATAAACGAAAGTTTAACTAAGCTATACTAACCCAGGGTTGGTCAATTTCTGTGCC  
AGCCACCGCGGTACACGATTAACCCAAGTCAATAGAAGC  
CGGCGTAAAGAGTGTTTTAGATCACCCCTCCCCAATAAAGCTAAAACCTCACCTGAGTTGTAAAAACTCCAGTTGACAC  
AAAATAGACTACGAAAGTGGCTTTAACATATCTGAACACA  
CAATAGCTAAGACCCAACTGGGATTAGATACCCCACTATGCTTAGCCCTAACCTCAACAGTTAAATCAACAAAACCTGC  
TCGCCAGAACACTACGAGCCACAGCTTAAAACCTCAAAGGA  
CCTGGCGGTGCTTCATATCCCTCTAGAGGAGCCTGTTCTGTAATCGATAAACCCCGATCAACCTCACCACCTCTTGCTCA  
GCCTATATACCGCCATCTTCAGCAAACCTGATGAAGGCT  
ACAAAGTAAGCGCAAGTACCCACGTAAAGACGTTAGGTCAAGGTGTAGCCCATGAGGTGGCAAGAAATGGGCTACATTTT  
CTACCCAGAAAACCTACGATAGCCCTTATGAAACTTAAGG  
GTCGAAGGTGGATTTAGCAGTAAACTGAGAGTAGAGTGCTTAGTTGAACAGGGCCCTGAAGCGGTACACACCGCCCGTC  
ACCCTCCTCAAGTATACTTCAAAGGACATTTAACTAAAAC

CCCTACGCATTTATATAGAGGAGACAAGTCGTAACATGGTAAGTGTACTGGAAAGTGCACCTTGGACGAACCAGAGTGTAG  
CTTAACACAAAGCACCCAACCTTACACTTAGGAGATTTCAA  
CTTAACCTTGACCGCTCTGAGCTAAACCTAGCCCCAAACCCACTCCACCTTACTACCAGACAACCTTAGCCAAACCATTTA  
CCCAAATAAAGTATAGGCGATAGAAATTGAAACCTGGCGC  
AATAGATATAGTACCGCAAGGGAAAGATGAAAAATTATAACCAAGCATAATATAGCAAGGACTAACCCCTATACCTTCTG  
CATAATGAATTAAGTAGAAATAACTTTTGCAAGGAGAGCCA  
AAGCTAAGACCCCCGAAACCAGACGAGCTACCTAAGAACAGCTAAAAGAGCACACCCCGTCTATGTAGCAAAATAGTGGGA  
AGATTTATAGGTAGAGGCGACAAACCTACCGAGCCTGGTG  
ATAGCTGGTTGTCCAAGATAGAATCTTAGTTCAACTTTAAATTTGCCACAGAACCCTCTAAATCCCCTTGTAATTTAA  
CTGTTAGTCCAAAGAGGAACAGCTCTTTGGACACTAGGAA  
AAAACCTTGTAGAGAGAGTAAAAAA-  
TTTAACACCCCATAGTAGGCCTAAAAGCAGCCACCAATTAAGAAAGCGTTCAAGCTCAACACCCACTACCTAAAAAA-  
TCCCAAACATATAACTG  
AACTCCTCACACCCAATTGGACCAATCTATCACCCCTATAGAAGAATAATGTTAGTATAAGTAACATGAAAACATTCTCC  
TCCGCATAAGCCTGCGTCAGATTAATAACACTGAACTGACA  
ATTAACAGCCCAATATCTACAATCAACCAACAAGTCATTATTACCCTCACTGTCAACCCAACACAGGCATGCTCATAAGG  
AAAGGTTAAAAAAGTAAAAGGAACTCGGCAATCTTACC  
CCGCCTGTTTACCAAAAACATCACCTCTAGCATCACAGTATTAGAGGCACCGCCTGCCAGTGACACATGTTTAAACGGC  
CGCGGTACCCTAACCGTGCAAAGGTAGCATAATCACTTGT  
TCCTTAAATAGGGACCTGTATGAATGGCTCCACGAGGGTTTCACTGTCTCTTACTTTTAAACAGTGAAATTGACCTGCC  
GTGAAGAGGCGGGCATAACACAGCAAGACGAGAAGACCCT  
ATGGAGCTTTAATTTATTAATGCAAACAGTACCTAACAAACCCACAGGTCCTAAACTACCAAACCTGCATTAATAATTTT  
GGTTGGGGCGACCTCGGAGCAGAACCCAACCTCCGAGCAG  
TACATGCTAAGACTTCACCAGTCAAAGCGAACTACTATACTCAATTGATCCAATAACTTGACCAACGGAACAAGTTACCC  
TAGGGATAACAGCGCAATCCTATTCTAGAGTCCATATCAA  
CAATAGGGTTTACGACCTCGATGTTGGATCAGGACATCCCGATGGTGCAGCCGCTATTAAAGGTTGTTTTGTTCAACGAT  
TAAAGTCTACGTGATCTGAGTTCAGACCGGAGTAATCCA  
GGTCGGTTTCTATCTACTTCAAATTCCTCCCTGTACGAAAGGACAAGAGAAATAAGGCCTACTTCACAAAGCGCCTTCCC  
CCGTAAATGATATCATCTCAACTTAGTATTATACCCACAC  
CCACCCAAGAACAGGGTTTTGTTAAGATGGCAGAGCCCGGTAATCGCATAAACTTAAACTTTACAGTCAGAGGTTCAAT  
TCCTCTTCTTAACAACATACCCATGGCCAACCTCCTACTC  
CTCATTGTACCCATTCTAATCGCAATGGCATTTCCTAATGCTTACCGAACGAAAAATTCTAGGCTATATACAACCTACGCAA  
AGGCCCAACGTTGTAGGCCCTACGGGCTACTACAACCC  
TTCGCTGACGCCATAAACTCTTCACCAAAGAGCCCTAAAACCCGCCACATCTACCATCACCCCTCTACATCACCGCCCC  
GACCTTAGCTCTCACCATCGCTCTTCTACTATGAACCCCC  
CTCCCCATACCCAACCCCTGGTCAACCTCAACCTAGGCCTCCTATTTATTCTAGCCACCTCTAGCCTAGCCGTTTACTC  
AATCCTCTGATCAGGGTGAGCATCAAACCTCAAACCTACGCC  
CTGATCGGCGCACTGCGAGCAGTAGCCCAAACAATCTCATATGAAGTCACCCTAGCCATCATTCTACTATCAACATTACT  
AATAAGTGGCTCCTTTAACCTCTCCACCCTTATCACAACA  
CAAGAACACCTCTGATTACTCCTGCCATCATGACCCTTGCCATAATATGATTTATCTCCACACTAGCAGAGACCAACCG  
AACCCCTTCGACCTTGCCGAAGGGGAGTCCGAACCTAGTC  
TCAGGCTTCAACATCGAATACGCCGAGGCCCTTCGCCCTATTCTTCATAGCCGAATACACAAACATTATTATAATAAA  
CACCCCTCACCACTACAATCTTCTAGGAACAACATATGAC  
GCACTCTCCCCTGAACTCTACACAACATATTTTGTACCAAGACCCTACTTCTAACCTCCCTGTTCTTATGAATTGAAAC  
AGCATAACCCCGATTCCGCTACGACCAACTCATAACCTC  
CTATGAAAAAATTCCTACCACTCACCTAGCATTACTTATATGATATGTCTCCATACCCATTACAATCTCCAGCATTCC  
CCCTCAAACCTAAGAAATATGTCTGATAAAAAGAGTTACTT  
TGATAGAGTAAATAATAGGAGCTTAAACCCCTTATTTCTAGGACTATGAGAATCGAACCCATCCCTGAGAATCCAAAAT  
TCTCCGTGCCACCTATCACACCCATCCTAAAGTAAGGTC  
AGCTAAATAAGCTATCGGGCCATACCCCGAAAATGTTGGTTATACCCTTCCCGTACTAATTAATCCCCTGGCCCAACCC  
GTCATCTACTCTACCATCTTTGCAGGCACACTCATCACAG  
CGCTAAGCTCGCACTGATTTTTTACCTGAGTAGGCCTAGAAATAAACATGCTAGCTTTTTATTCCAGTTCTAACCAAAAA  
ATAAACCTCGTTCCACAGAAGCTGCCATCAAGTATTTCC  
TCACGCAAGCAACCGCATCCATAATCCTTCTAATAGCTATCCTCTTCAACAATATACTCTCCGGACAATGAACCATAACC  
AATACTACCAATCAATACTCATATTAATAATCATAATGG  
CTATAGCAATAAACTAGGAATAGCCCCCTTCACTTCTGAGTCCAGAGGTTACCCAAGGCACCCCTCTGACATCCGGC  
CTGCTTCTTCTCACATGACAAAACTAGCCCCCATCTCAA

TCATATAACCAAATCTCTCCCTCACTAAACGTAAGCCTTCTCCTCACTCTCTCAATCTTATCCATCATAGCAGGCAGTTGA  
GGTGGATTAAACCAAACCCAGCTACGCAAATCTTAGCAT  
ACTCCTCAATTACCCACATAGGATGAATAATAGCAGTTCTACCGTACAACCCTAACATAACCATTCTTAATTTAACTATT  
TATATTATCCTAACTACTACCGCATTCTACTACTCAACT  
TAAACTCCAGCACCACGACCCTACTACTATCTCGCACCTGAAACAAGCTAACATGACTAACACCCTTAATTCCATCCACC  
CTCCTCTCCCTAGGAGGCCTGCCCCGCTAACCGGCTTTT  
TGCCCAAATGGGCCATTATCGAAGAATTCACAAAAACAATAGCCTCATCATCCCCACCATCATAGCCACCATCACCCCTC  
CTTAACCTCTACTTCTACCTACGCCTAATCTACTCCACCT  
CAATCACACTACTCCCCATATCTAACAAACGTAATAATAATAATGACAGTTTGAACATACAAAACCCACCCCATTCCTCCCC  
ACACTCATCGCCCTTACCACGCTACTCCTACCTATCTCCC  
CTTTTATACTAATAATCTTATAGAAATTTAGGTTAAATACAGACCAAGAGCCTTCAAAGCCCTCAGTAAGTTGCAATACT  
TAATTTCTGTAACAGCTAAGGACTGCAAAAACCCCACTCTG  
CATCAACTGAACGCAAATCAGCCACTTTAATTAAGCTAAGCCCTTACTAGACCAATGGGACTTAAACCCACAAACACTTA  
GTTAACAGCTAAGCACCCCTAATCAACTGGCTTCAATCTAC  
TTCTCCCGCCGCGGGGAAAAAAGGCGGGGAGAAGCCCCGGCAGGTTTGAAGCTGCTTCTTCGAATTTGCAATTCATATGA  
AAATCACCTCGGAGCTGGTAAAAAGAGGCCTAACCCCTGT  
CTTTAGATTTACAGTCCAATGCTTCACTCAGCCATTTTACCTCACCCCC-  
ACTGATGTTGCGCCGACCGTTGACTATTCTCTACAAACCACAAAGACATTGGAACACTATACTATTATTC  
GGCGCATGAGCTGGAGTCTTAGGCACAGCTCTAAGCCTCCTTATTCGAGCCGAGCTGGGCCAGCCAGGCAACCTTCTAGG  
TAACGACCACATCTACAACGTTATCGTCACAGCCCATGCA  
TTTGTAAATAATCTTCTTCATAGTAATACCCATCATAATCGGAGGCTTTGGCAACTGACTAGTTCCCCTAATAATCGGTGC  
CCCCGATATGGCGTTTCCCCGCATAAACAACATAAGCTTC  
TGACTCTTACCTCCCTCTCTCCTACTCCTGCTCGCATCTGCTATAGTGGAGGCCGGAGCAGGAACAGGTTGAACAGTCTA  
CCCTCCCTTAGCAGGGAACCTACTCCCACCCTGGAGCCTCC  
GTAGACCTAACCATCTTCTCCTTACACCTAGCAGGTGTCTCCTCTATCTTAGGGGCCATCAATTTTCATCACAACAATTAT  
CAATATAAAAACCCCTGCCATAACCCAATACCAAACGCCC  
CTCTTCGTCTGATCCGTCTAATCACAGCAGTCTACTTCTCCTATCTCTCCAGTCTTAGCTGCTGGCATCACTATACT  
ACTAACAGACCGCAACCTCAACACCACCTTCTTCGACCCC  
GCCGGAGGAGGAGACCCCACTTCTATACCAACACCTATTCTGATTTTTTCGGTCAACCCTGAAGTTTATATTCTTATCCTACC  
AGGCTTCGGAATAATCTCCCATATTGTAACCTTACTACTCC  
GGAAAAAAGAACCATTTGGATACATAGGTATGGTCTGAGCTATGATATCAATTGGCTTCTTAGGGTTTATCGTGTGAGC  
ACACCATATATTTACAGTAGGAATAGACGTAGACACACGA  
GCATATTTACCTCCGCTACCATAATCATCGCTATCCCCACCGCGTCAAAGTATTTAGCTGACTCGCCACACTCCACGG  
AAGCAATATGAAATGATCTGCTGCAGTCTGAGCCCTA  
GGATTTCATCTTTCTTTTACCAGTAGGTGGCCTGACTGGCATTGTATTAGCAAACCTCATCACTAGACATCGTACTACACGA  
CACGTACTACGTTGTAGCCCACTTCCACTATGTCTATCA  
ATAGGAGCTGTATTTGCCATCATAGGAGGCTTCATTCACTGATTTCCCCTATTCTCAGGCTACACCCTAGACCAAACCTA  
CGCCAAAATCCATTTCACTATCATATTCATCGGCGTAAAT  
CTAACTTTCTTCCCACAACACTTTCTCGGCCTATCCGGAATGCCCCGACGTTACTCGGACTACCCCGATGCATACACCAC  
ATGAAACATCCTATCATCTGTAGGCTCATTCAATTTCTCTA  
ACAGCAGTAATATTAATAATTTTCATGATTTGAGAAGCCTTCGCTTGAAGCGAAAAGTCTTAATAGTAGAAGAACCCTC  
CATAAACCTGGAGTGACTATATGGATGCCCCCACCCTAC  
CACACATTCGAAGAACCCGTATACATAAAATCTAGACAAAAAGGAAGGAATCGAACCCCCCAAAGCTGGTTTTCAAGCCA  
ACCCCATGGCCTCCATGACTTTTTTCAAAAAGGTATTAGAA  
AAACCATTTCATAACTTTGTCAAAGTTAAATTATAGGCTAAATCCTATATATCTTAATGGCACATGCAGCGCAAGTAGGT  
CTACAAGACGCTACTTCCCCTATCATAGAAGAGCTTATCA  
CCTTTTCATGATCACGCCCTCATAATCATTTTCTTTATCTGCTTCTTAGTCTGTATGCCCTTTTCTTAACTCACAACA  
AAACTAATAATACTAACATCTCAGACGCTCAGGAAATAG  
AAACCGTCTGAACTATCCTGCCCCCATCATCTAGTCTCATCGCCCTCCCATCCCTACGCATCCTTTACATAACAGAC  
GAGGTCAACGATCCCTCCCTTACCATCAAATCAATTGGCC  
ACCAATGGTACTGAACCTACGAGTACACCGACTACGGCGGACTAATCTTCAACTCCTACATACTTCCCCATTATTCTTA  
GAACCAGGCGACCTGCGACTCCTTGACGTTGACAATCGAG  
TAGTACTCCCGATTGAAGCCCCCATTTCGTATAATAATTACATCACAAGACGTCTTGCCTCATGAGCTGTCCCCACATTA  
GGCTTAAAAACAGATGCAATTTCCCGGACGTCTAAACCAA  
CCACTTTACCAGCTACACGACCGGGGTATACTACGGTCAATGCTCTGAAATCTGTGGAGCAAACCACAGTTTTCATGCC  
ATCGTCTAGAATTAATTTCCCCTAAAAATCTTTGAAATAG

GGCCCGTATTTACCTATAGCACCCCTCTACCCCTCTAGAGCCACTGTAAAGCTAACTTAGCATTAACTTTTAAGT  
TAAAGATTAAGAGAACCAACACCTCTTTACAGTGAAATGC  
CCCACTAAATACTACCGTATGGCCACCATAATTACCCCATACTCCTTACACTATTCTCATCACCCAATAAAAATA  
TTAAACACAAACTACCACCTACCTCCCTCACCAAAGCCCA  
TAAAAATAAAAAATTATAACAAACCCTGAGAACCAAAATGAACGAAAATCTGTTTCGCTTCATTTCATTGCCCCACAAATCC  
TAGGCCTACCCGCCGAGTACTGATCATTCTATTTCCCTC  
TCTATTGATCCCCACCTCCAAATATCTCATCAACAACCGACTAATCACCACCCAACAATGACTAATCAAACCTAACCTCAA  
AACAAATGATAACCATACACAACACTAAAGGACGAACCTG  
ATCTCTTATACTAGTATCCTTAATCATTTTTTATTGCCACAATAACCTCCTCGGACTCCTGCCTCACTCATTACACCAA  
CCACCCAATATCTATAAACCTAGCCATGGCCATCCCCTT  
ATGAGCGGGCGCAGTGATTATAGGCTTTTCGCTCTAAGATTAATAATGCCCCTAGCCACTTCTTACCACAAGGCACACCTA  
CACCCCTTATCCCCATACTAGTTATTATCGAAACCATCAG  
CCTACTCATTCAACCAATAGCCCTGGCCGTACGCCCTAACCGCTAACATTACTGCAGGCCACCTACTCATGCACCTAATTG  
GAAGCGCCACCCTAGCAATATCAACCATTAACCTTCCCTC  
TACACTTATCATCTTACAATTCTAATTCTACTGACTATCCTAGAAATCGCTGTGCCTTAATCCAAGCCTACGTTTTCA  
CACTTCTAGTAAGCCTCTACCTGCACGACAACACATAATG  
ACCCACCAATCACATGCCTATCATATAGTAAACCCAGCCCATGACCCCTAACAGGGGCCCTCTCAGCCCTCCTAATGAC  
CTCCGGCCTAGCCATGTGATTTCACTTCCACTCCATAACG  
CTCCTCATACTAGGCCTACTAACCAACACACTAACCATATACCAATGATGGCGGATGTAACACGAGAAAGCACATACCA  
AGGCCACCACACACCACCTGTCCAAAAGGCCTTCGATAC  
GGGATAATCCTATTTATTACCTCAGAAGTTTTTTTTCTTCGCAGGATTTTTCTGAGCCTTTTACCCTCCAGCCTAGCCCC  
TACCCCAATTAGGAGGGCACTGGCCCAACAGGCATC  
ACCCCGCTAAATCCCCTAGAAGTCCCCTCCTAAACACATCCGTATTACTCGCATCAGGAGTATCAATCACCTGAGCTCA  
CCATAGTCTAATAGAAAACAACCGAAACCAATAATTCAA  
GCACTGCTTATTACAATTTTACTGGGTCTCTATTTTACCCTCCTACAAGCCTCAGAGTACTTCGAGTCTCCCTTACCAT  
TTCCGACGGCATCTACGGCTCAACATTTTTTTGTAGCCACA  
GGCTTCCACGGACTTCACGTCATTATTGGCTCAACTTTCCTCACTATCTGCTTCATCCGCCAACTAATATTTCACTTTAC  
ATCCAAACATCAGTTTGGCTTCGAAGCCGCCCGCTGATAC  
TGGCATTTTGTAGATGTGGTTTACTATTTCTGTATGTCTCCATCTATTGATGAGGGTCTTACTCTTTTAGTATAAATAG  
TACCGTTAACTTCCAATTAAGTTTGGACAACATTCAA  
AAAAGAGTAATAAACTTCGCCTTAATTTTTAATAATCAACACCCTCCTAGCCTTACTACTAATAATTATTACATTTTACT  
ACCACAACCTCAACGGCTACATAGAAAATCCACCCCTTAC  
GAGTGCAGCTTCGACCCTATATCCCCCGCCCGCTCCCTTTCTCCATAAAATTTCTTCTTAGTAGCTATTACCTTCTTATT  
ATTTGATCTAGAAATTGCCCTCCTTTTACCCTACCATGA  
GCCCTACAAACAATAACCTGCCGCTAATAGTTATGTCATCCCTCTTATTAATCATCATCCTAGCCCTAAGTCTGGCCTA  
TGAGTGACTACAAAAGGATTAGACTGAACCGAATTGGTA  
TATAGTTTAAACAAAACGAATGATTTGACTCATTAAATTATGATAATCATATTTACCAAATGCCCTCATTACATAAA  
TATTATACTAGCATTACCATCTCACTTCTAGGAATACTA  
GTATATCGCTCACACCTCATATCCTCCCTACTATGCCTAGAAGGAATAATACTATCGCTGTTTCATTATAGCTACTCTCAT  
AACCTCAACACCCACTCCCTCTTAGCCAATATTGTGCCT  
ATTGCCATACTAGTCTTTGCCGCTGCGAAGCAGCGGTGGGCCTAGCCCTACTAGTCTCAATCTCCAACACATATGGCCT  
AGACTACGTACATAACCTAAACCTACTCCAATGCTAAAAC  
TAATCGTCCCAACAATTATATTACTACCACTGACATGACTTTCCAAAAACACATAATTTGAATCAACACAACCACCCAC  
AGCCTAATTATTAGCATCATCCCTCTACTATTTTTTAACC  
AAATCAACAACAACCTATTTAGCTGTTCCCAACCTTTTCTCCGACCCCTAACAAACCCCTCCTAATACTAACTACC  
TGACTCCTACCCCTCACAATCATGGCAAGCCAACGCCACT  
TATCCAGTGAACCACTATCACGAAAAAACTCTACCTCTCTATACTAATCTCCCTACAAATCTCCTTAATTATAACATTC  
ACAGCCACAGAATAATCATATTTTATATCTTCTTCGAAA  
CCACACTTATCCCCACCTTGGCTATCATCCCCGATGAGGCAACCAGCCAGAACGCCTGAACGCAGGCACATACTTCTTA  
TTCTACACCCTAGTAGGCTCCCTTCCCCTACTCATCGCAC  
TAATTTACACTCACAACACCCTAGGCTCACTAAACATTCTACTACTCACTCTCACTGCCCAAGAACTATCAAACCTCCTGA  
GCCAACAACCTAATATGACTAGCTTACACAATAGCTTTTTA  
TAGTAAAGATACCTCTTTACGGACTCCACTTATGACTCCCTAAAGCCCATGTGCAAGCCCCCATCGCTGGGTCAATAGTA  
CTTGCCGCGAGTACTCTTAAACTAGGCGGCTATGGTATAA  
TACGCCTCACACTCATTCTCAACCCCTGACAAAACACATAGCCTACCCCTTCTTGTACTATCCCTATGAGGCATAATT  
ATAACAAGCTCCATCTGCCTACGACAAACAGACCTAAAAT

CGCTCATTGCATACTCTTCAATCAGCCACATAGCCCTCGTAGTAACAGCCATTCTCATCCAAACCCCCTGAAGCTTCACC  
GGCGCAGTCATTCTCATAATCGCCACGGGCTTACATCCT  
CATTACTATTCTGCCTAGCAAACCTCAAACCTACGAACGCACTCACAGTCGCATCATAATCCTCTCTCAAGGACTTCAAACCT  
CTACTCCCCTAATAGCTTTTTTGGATGACTTCTAGCAAGCC  
TCGCTAACCTCGCCTTACCCCCACTATTAACCTACTGGGAGAAGCTCTCTGTGCTAGTAACCACGTTCTCCTGATCAAAT  
ATCACTCTCCTACTTACAGGACTCAACATACTAGTCACAG  
CCCTATACTCCCTCTACATATTTACCACAACACAATGGGGCTCACTCACCCACCACATTAACAACATAAAACCCCTCATT  
ACACGAGAAAACACCCTCATGTTTCATACACCTATCCCCCA  
TTCTCCTCCTATCCCTCAACCCCGACATCATTACCGGGTTTTTCTCTTGTAATATAGTTTTAACCAAAACATCAGATTGT  
GAATCTGACAACAGAGGCTTACGACCCCTTATTTACCAG  
AAAGCTCACAAGAAGCTTAACCTCATGCCCCCATGTCTAACAAACATGGCTTTTCTCAACTTTTTAAAGGATAACAGCTATCC  
ATTGGTCTTAGGCCCCAAAAATTTTGGTGCAACTCCAAAT  
AAAAGTAATAACCATGCACACTACTATAACCACCCTAACCTGACTTCCCTAATTCCCCCATCCTTACCACCCTCGTTA  
ACCCTAACAAAAAAACTCATACCCCTATTATGTAAAATC  
CATTGTGCGATCCACCTTTATTATCAGTCTCTTCCCCACAACAATATTCATGTGCCTAGACCAAGAAGTTATTATCTCGA  
ACTGACACTGAGCCACAACCCAAACAACCCAGCTCTCCCT  
AAGCTTCAAACCTAGACTACTTCTCCATAATATTCATCCCTGTAGCATTGTTGTTACATGGTCCATCATAGAATTCTCAC  
TGTGATATATAAACTCAGACCCAAACATTAATCAGTTCTT  
CAAATATCTACTCATCTTCCCTAATTACCATACTAATCTTAGTTACCGCTAACAACTATTCCAAGTTCATCGGCTGAG  
AGGGCGTAGGAATTATATCCTTCTTGCTCATCAGTTGATG  
ATACGCCCAGCAGATGCCAACACAGCAGCCATTCAAGCAATCCTATACAACCGTATCGGCGATATCGGTTTTCATCCTCG  
CCTTAGCATGATTTATCCTACTCCAACCTCATGAGACCC  
ACAACAAATAGCCCTTCTAAACGCTAATCCAAGCCTCACCCACTACTAGGCCTCCTCCTAGCAGCAGCAGGCAAATCAG  
CCCAATTAGGTCTCCACCCCTGACTCCCTCAGCCATAGA  
AGGCCCCACCCAGTCTCAGCCCTACTCCACTCAAGCACTATAGTTGTAGCAGGAATCTTCTTACTCATCCGCTTCCACC  
CCCTAGCAGAAAATAGCCCACTAATCCAACTCTAACACT  
ATGCTTAGGCGCTATCACCCTCTGTTGCGCAGCAGTCTGCGCCCTTACACAAAATGACATCAAAAAAATCGTAGCCTTCT  
CCACTTCAAGTCAACTAGGACTCATAATAGTTACAATCG  
CATCAACCAACCACTAGCATTCTGCACATCTGTACCCACGCCTTCTTCAAAGCCATACTATTTATGTGCTCCGGGT  
CCATCATCCACAACCTTAAACAATGAACAAGATATTGAAA  
AATAGGAGGACTACTCAAACCATACCTCTCACTTCAACCTCCCTCACCATTGGCAGCCTAGCATTAGCAGGAATACCTT  
TCCTCACAGGTTTTCTACTCCAAAGACCACATCATCGAAAC  
CGCAAACATATCATAACAAACGCTGAGCCCTATCTATTACTCTCATCGCTACCTCCCTGACAAGCGCCTATAGCACTC  
GAATAATTCTTCTCACCCCTAACAGGTCAACCTCGCTTCCC  
CACCCCTTACTAACATTAACGAAAATAACCCACCCCTACTAAACCCATTAACGCCTGACAGCCGGAAGCCTATTTCGCAG  
GATTTCTCATTACTAACAACATTTCCCCCGCATCCCCCTT  
CCAAACAACAATCCCCCTTACCTAAAACCTCACAGCCCTCGCTGTCACTTTCTTAGGACTTCTAACAGCCCTAGACCTCA  
ACTACCTAACCAACAACCTTAAAATAAAATCCCCACTATG  
CACATTTTATTTCTCAAACATACTCGGATTCTACCCTAGCATCACACACCGCACAAATCCCCTATCTAGGCCTTCTTACGA  
GCCAAAACCTGCCCTACTCCTCCTAGACCTAACCTGACT  
AGAAAAGCTATTACCTAAAACAATTTACAGCACCAAATCTCCACCTCCATCATCACCTCAACCCAAAAAGGCATAATTA  
AACTTTACTTCTCTCTTTCTTCTTCCCACTCATCCTAAC  
CCTACTCCTAATCACATAACCTATTTCCCCGAGCAATCTCAATTACAATATATACACCAACAAACAATGTTCAACCAGTA  
ACTACTACTAATCAACGCCATAATCATACAAAGCCCCCG  
CACCAATAGGATCCTCCCGAATCAACCCTGACCCCTCTCCTTATAAATTATTAGCTTCTTACTACTATTAAAGTTTACC  
ACAACCACCCCATCATACTCTTTACCCACAGCACA  
ATCCTACCTCCATCGCTAACCCCACTAAAACACTCACCAGACTCAACCCCTGACCCCATGCCTCAGGATACTCCTCA  
ATAGCCATCGCTGTAGTATATCCAAAGACAACCATCATT  
CCCCTAAATAAATTAAAAAAACTATTAACCCATATAACCTCCCCAAAATTGAGAATAATAACACACCCGACCACACCG  
CTAACAAATCAATACTAAACCCCAATAAATAGGAGAAGGCT  
TAGAAGAAAACCCCAAAACCCCACTAAACCCCACTCAACAGAAAACAAAGCATAACATCATTATTCTCGCACGGACT  
ACAACCACGACCAATGATATGAAAAACCATCGTTGTATTT  
CAACTACAAGAACACCAATGACCCCAATACGCAAAACTAACCCCTAATAAATTAATTAACCACTCATTATCATCGACCTC  
CCCACCCCATCCAACATCTCCGCATGATGAAACTTCGGCT  
CACTCCTTGGCGCCTGCCTGATCCTCAAATCACCACAGGACTATTCTAGCCATGCACTACTCACAGACGCCTCAACC  
GCCTTTTTCATCAATCGCCACATCACTCGAGACGTAAAT

ATGGCTGAATCATCCGCTACCTTCACGCCAATGGCGCCTCAATATTCTTTATCTGCCTCTTCTACACATCGGGCGAGGC  
CTATATTACGGATCATTTCTCTACTCAGAAACCTGAAACA  
TCGGCATTATCCTCCTGCTTGCAACTATAGCAACAGCCTTCATAGGCTATGTCTCCCGTGAGGCCAAATATCATTCTGA  
GGGGCCACAGTAATTACAACTTACTATCCGCCATCCCAT  
ACATTGGGACAGACCTAGTTCAATGAATCTGAGGAGGCTACTCAGTAGACAGTCCCACCCTCACACGATTCTTTACCTTT  
CACTTCATCTTGCCCTTCATTATTGCAGCCCTAGCAGCAC  
TCCACCTCCTATTCTTGACGAAACGGGATCAAACAACCCCTTAGGAATCACCTCCCATTCCGATAAAATCACCTTCCAC  
CCTTACTACACAATCAAAGACGCCCTCGGCTTACTTCTCT  
TCCTTCTCTCCTTAATGACATTAACACTATTCTCACCAGACCTCCTAGGCGACCCAGACAATTATACCCTAGCCAACCCC  
TTAAACACCCCTCCCCACATCAAGCCCGAATGATATTTCC  
TATTTCGCTACACAATTCTCCGATCCGTCCCTAACAACTAGGAGGCGTCTTGCCCTATTACTATCCATCCTCATCCTA  
GCAATAATCCCCATCCTCATATATCCAAACAACAAGCA  
TAATATTTTCGCCACTAAGCCAATCACTTTATTGACTCTAGCCGACAGCTCCTCATTCTAACCTGAATCGGAGGACAA  
CCAGTAAGCTACCCTTTTACCATCATTGGACAAGTAGCAT  
CCGTACTATACTTCAACAATCCTAATCCTAATACCAACTATCTCCCTAATTGAAAACAAAATACTCAAATGGGCCTGT  
CCTTGTAGTATAAACTAATACACCAGTCTTGTAACCGGA  
GATGAAAACCTTTTTTCCAAGGACAAATCAGAGAAAAAGTCTTTAACTCCACCATTAGCACCCAAAGCTAAGATTCTAATT  
TAAACTATT

#ASIA Buriat

CCACAGTTTTATGTAGCTTACCTCCTCAAAGCAATACACTGAAAATGTTTAGACGGGCTCACATCACCCATAAAACAATA  
GGTTTGGTCTAGCCTTTCTATTAGCTCTTAGTAAGATTA  
CACATGCAAGCATCCCCGTTCCAGTGAGTTACCCCTCTAAATCACCACGATCAAAGGGACAAGCATCAAGCACGCAGCA  
ATGCAGCTCAAACGCTTAGCCTAGCCACACCCCCACGGG  
AAACAGCAGTGATTAACCTTTAGCAATAAACGAAAGTTTAACTAAGCTATACTAACCCAGGGTTGGTCAATTTTCGTGCC  
AGCCACCGCGGTACACGATTAACCCAAGTCAATAGAAGC  
CGGCGTAAAGAGTGTTTTAGATCACCCCTCCCCAATAAAGCTAAAACCTCACCTGAGTTGTAAAAAACTCCAGTTGACAC  
AAAATAGACTACGAAAGTGGCTTTAACATATCTGAACACA  
CAATAGCTAAGACCCAAACTGGGATTAGATACCCCACTATGCTTAGCCCTAAACCTCAACAGTTAAATCAACAAAACCTGC  
TCGCCAGAACACTACGAGCCACAGCTTAAAACCTCAAAGGA  
CCTGGCGGTGCTTCATATCCCTCTAGAGGAGCCTGTTCTGTAATCGATAAACCCCGATCAACCTCACACCTCTTGCTCA  
GCCTATATACCGCCATCTTCAGCAAACCCTGATGAAGGCT  
ACAAAGTAAGCGCAAGTACCCACGTAAAGACGTTAGGTCAAGGTGTAGCCCATGAGGTGGCAAGAAATGGGCTACATTTT  
CTACCCCAAGAAACTACGATAGCCCTTATGAAACTTAAGG  
GTCGAAGGTGGATTTAGCAGTAAACTGAGAGTAGAGTGCTTAGTTGAACAGGGCCCTGAAGCGGTACACACCGCCCGTC  
ACCCTCCTCAAGTATACTTCAAAGGACATTTAACTAAAAC  
CCCTACGATTTATATAGAGGAGACAAGTCGTAACATGGTAAGTGTACTGGAAAGTGCACCTGGACGAACCAGAGTGTAG  
CTTAACACAAAGCACCCAACCTTACACTTAGGAGATTTCAA  
CTTAACCTTGACCGCTCTGAGCTAAACCTAGCCCCAAACCCACTCCACCTTACTACCAGACAACCTTAGCCAAACCATTTA  
CCCAAATAAAGTATAGGCGATAGAAATTGAAACCTGGCGC  
AATAGATATAGTACCGCAAGGGAAAGATGAAAAATTATAACCAAGCATAATATAGCAAGGACTAACCCCTATACCTTCTG  
CATAATGAATTAAGTAAATAAATTTGCAAGGAGAGCCA  
AAGCTAAGACCCCCGAAACCAGACGAGCTACCTAAGAACAGCTAAAAGAGCACACCCCGTCTATGTAGCAAAATAGTGGGA  
AGATTTATAGGTAGAGGCGACAAACCTACCGAGCCTGGTG  
ATAGCTGGTTGTCCAAGATAGAATCTTAGTTCAACTTTAAATTTGCCACAGAACCCTCTAAATCCCCTTGTAATTTAA  
CTGTTAGTCAAAGAGGAACAGCTCTTTGGACACTAGGAA  
AAAACCTTGTAGAGAGAGTAAAAAA-  
TTTAAACCCCATAGTAGGCCTAAAAGCAGCCACCAATTAAGAAAGCGTTCAAGCTCAACACCCACTACCTAAAAAATCC  
CAAACATATAACTG  
AACTCCTCACACCCAATTGGACCAATCTATCACCCCTATAGAAGAACTAATGTTAGTATAAGTAACATGAAAACATTCTCC  
TCCGCATAAGCCTGCGTCAGATTAAAAACACTGAACTGACA  
ATTAACAGCCCAATATCTACAATCAACCAACAAGTCATTATTACCCTCACTGTCAACCCCAACACAGGCATGCTCATAAGG  
AAAGGTTAAAAAAGTAAAAGGAACTCGGCAAATCTTACC  
CCGCTGTTTACCAAAAACATCACCTCTAGCATCACAGTATTAGAGGCACCGCCTGCCAGTGACACATGTTTAAACGGC  
CGCGGTACCCTAACCGTGCAAAGGTAGCATAATCACTTGT  
TCCTTAAATAGGGACCTGTATGAATGGCTCCACGAGGGTTTCAGCTGTCTCTTACTTTTAAACAGTGAAATTGACCTGCC  
GTGAAGAGGCGGCATGACACAGCAAGACGAGAAGACCCT

ATGGAGCTTTAATTTATTAATGCAAACAGTACCTAACAAACCCACAGGTCTAAACTACCAAACCTGCATTAAAAATTTTC  
GGTTGGGGCGACCTCGGAGCAGAACCCAACCTCCGAGCAG  
TACATGCTAAGACTTCACCAGTCAAAGCGAACTACTATACTCAATTGATCCAATAACTTGACCAACGGAACAAGTTACCC  
TAGGGATAACAGCGCAATCCTATTCTAGAGTCCATATCAA  
CAATAGGGTTTTACGACCTCGATGTTGGATCAGGACATCCCGATGGTGCAGCCGCTATTAAGGTTTCGTTTTGTTCAACGAT  
TAAAGTCTACGTGATCTGAGTTCAGACCCGGAGTAATCCA  
GGTCGGTTTTCTATCTACTTCAAATTCCTCCCTGTACGAAAGGACAAGAGAAATAAGGCCTACTTCACAAAGCGCCTTCCC  
CCGTAAATGATATCATCTCAACTTAGTATTATACCCACAC  
CCACCCAAGAACAGGGTTTTGTTAAGATGGCAGAGCCCGGTAATCGCATAAACTTAAACTTTTACAGTCAGAGGTTCAAT  
TCCTCTTCTTAACAACATACCCATGGCCAACCTCCTACTC  
CTCATTGTACCCATTCTAATCGCAATGGCATTTCCTAATGCTTACCGAACGAAAAATTCTAGGCTATATACAACCTACGCAA  
AGGCCCAACGTTGTAGGCCCTACGGGCTACTACAACCC  
TTCGCTGACGCCATAAACTCTTCCACAAAGAGCCCTAAAACCCGCCACATCTACCATCACCCCTCTACATCACCGCCCC  
GACCTTAGCTCTCACCATCGCACTTCTACTATGAACCCCC  
CTCCCCATAACCAACCCCTGGTCAACCTCAACCTAGGCCTCCTATTTATTCTAGCCACCTCTAGCCTAGCCGTTTACTC  
AATCCTCTGATCAGGGTGAGCATCAAACCTCAAACCTACGCC  
CTGATCGGCGCACTGCGAGCAGTAGCCCAAACAATCTCATATGAAGTCACCCTAGCCATCATTCTACTATCAACATTACT  
AATAAGTGGCTCCTTTAACCTCTCCACCCTTATCACAACA  
CAAGAGCACCTCTGATTACTCCTGCCATCATGACCCTTGCCATAATATGATTTATCTCCACACTAGCAGAGACCAACCG  
AACCCCTTCGACCTTGCCGAAGGGGAGTCCGAACCTAGTC  
TCAGGCTTCAACATCGAATACGCCGAGGCCCTTCGCCCTATTCTTCATAGCCGAATACACAAACATTATTATAATAAA  
CACCCCTCACCACTACAATCTTCTAGGAACAACATATGAC  
GCACTCTCCCTGAACTCTACACAACATATTTTTGTCCACCAAGACCCTACTTCTAACCTCCCTGTTCTTATGAATTGAAAC  
AGCATACCCCGATTCCGCTACGACCAACTCATAACCTC  
CTATGAAAAAATTCCTACCCTCACCCCTAGCATTACTTATATGATATGTCTCCATACCCATTACAATCTCCAGCATTCC  
CCCTCAAACCTAAGAAATATGTCTGATAAAAGAGTTACTT  
TGATAGAGTAAATAATAGGAGCTTAAACCCCTTATTTCTAGGACTATGAGAATCGAACCCATCCCTGAGAATCCAAAAT  
TCTCCGTGCCACCTATCACACCCCATCCTAAAGTAAGTCT  
AGCTAAATAAGCTATCGGGCCCATACCCCGAAAATGTTGGTTATACCCTTCCCGTACTAATTAATCCCTGGCCCAACCC  
GTCATCTACTCTACCATCTTTCGAGGCACACTCATCACAG  
CGCTAAGCTCGCACTGATTTTTTACCTGAGTAGGCCTAGAAATAAACATGCTAGCTTTTTATTCCAGTTCTAACCAAAAA  
ATAAACCCCTCGTTCCACAGAAGCTGCCATCAAGTATTTCC  
TCACGCAAGCAACCGCATCCATAATCCTTCTAATAGCTATCCTCTTCAACAATATACTCTCCGGGCAATGAACCATAACC  
AATACTACCAATCAATACTCATCATTAATAATCATAATGG  
CTATAGCAATAAACTAGGAATAGCCCCCTTTCACTTCTGAGTCCCAGAGGTTACCCAAGGCACCCCTCTGACATCCGGC  
CTGCTTCTTCTCATATGACAAAACTAGCCCCCATCTCAA  
TCATATACCAAATCTCTCCCTCACTAAACGTAAGCCTTCTCCTCACTCTCTCAATCTTATCCATCATAGCAGGCAGTTGA  
GGTGGATTAAACCAAACCCAGCTACGCAAATCTTAGCAT  
ACTCCTCAATTACCCACATAGGATGAATAATAGCAGTTCTACCGTACAACCCCTAACATAACCATTCTTAATTTAACTATT  
TATATTATCCTAACTACTACCGCATTCTACTACTCAACT  
TAAACTCCAGCACCACGACCCTACTACTATCTCGCACCTGAAACAAGCTAACATGACTAACACCCTTAATTCCATCCACC  
CTCCTCTCCCTAGGAGGCCTGCCCCGCTAACCGGCTTTT  
TGCCCAAATGGGCCATTATCGAAGAATTCACAAAAACAATAGCCTCATCATCCCCACCATCATAGCCACCATCACCCCTC  
CTTAACCTCTACTTCTACCTACGCCTAATCTACTCCACCT  
CAATCACACTACTCCCATATCTAACAACGTAATAAATAAATGACAGTTTGAACATACAAAACCCACCCATTCTCCCC  
ACACTCATCGCCCTTACCACGCTACTCCTACCTATCTCCC  
CTTTTATACTAATAATCTTATAGAAATTTAGGTTAAATACAGACCAAGAGCCTTCAAAGCCCTCAGTAAGTTGCAATACT  
TAATTTCTGTAACAGCTAAGGACTGCAAAACCCCACTCTG  
CATCAACTGAACGCAAAATCAGCCACTTTAATTAAGCTAAGCCCTTACTAGACCAATGGGACTTAAACCCACAAACACTTA  
GTTAACAGCTAAGCACCCCTAATCAACTGGCTTCAATCTAC  
TTCTCCCGCCGCGGGAAAAAAGGCGGGAGAAGCCCCGGCAGGTTTGAAGCTGCTTCTTTCGAATTTGCAATTTCAATATGA  
AAATCACCTCGGAGCTGGTAAAAAGAGGCCTAACCCCTGT  
CTTTAGATTTACAGTCCAATGCTTCACTCAGCCATTTTACCTCACCCCC-  
ACTGATGTTCCGCCACCGTTGACTATTCTCTACAAACCACAAAGACATTGGAACACTATACTATTATTC  
GGCGCATGAGCTGGAGTCTTAGGCACAGCTCTAAGCCTCCTTATTCGAGCCGAGCTAGGCCAGCCAGGCAACCTTCTAGG  
TAACGACCACATCTACAACGTTATCGTCACAGCCCATGCA

TTTGTAAATAATCTTCTTCATAGTAATACCCATCATAATCGGAGGCTTTGGCAACTGACTAGTTCCCCTAATAATCGGTGC  
CCCCGATATGGCGTTTTCCCCGCATAAACATAAGCTTC  
TGACTCTTACCTCCCTCTCTCCTACTCCTGCTCGCATCTGCTATAGTGGAGGCCGGAGCAGGAACAGGTTGAACAGTCTA  
CCCTCCCTTAGCAGGGAACCTACTCCCACCCTGGAGCCTCC  
GTAGACCTAACCATCTTCTCCTTACACCTAGCAGGTGTCTCCTCTATCTTAGGGGCCATCAATTTTCATCACAACAATTAT  
CAATATAAAACCCCTGCCATAACCCAATACCAAACGCCC  
CTCTTCGTCTGATCCGTCCTAATCACAGCAGTCTACTTCTCCTATCTCTCCCAGTCTTAGCTGCTGGCATCACTATACT  
ACTAACAGACCGCAACCTCAACACCACCTTCTTCGACCCC  
GCCGGAGGAGGAGACCCATTCTATACCAACACCTATTCTGATTTTTTCGGTACCCTGAAGTTTATATTCTTATCCTACC  
AGGCTTCGGAATAATCTCCCATATTGTAACCTTACTACTCC  
GGAAAAAAGAACCATTTGGATACATAGGTATGGTCTGAGCTATGATATCAATTGGCTTCTTAGGTTTTATCGTGTGAGC  
ACACCATATATTTACAGTAGGAATAGACGTAGACACACGA  
GCATATTTTACCTCCGCTACCATAATCATCGCTATCCCCACCGCGTCAAAGTATTTAGCTGACTCGCCACACTCCACGG  
AAGCAATATGAAATGATCTGCTGCAGTCTCTGAGCCCTA  
GGATTCATCTTTCTTTTACCCTAGGTGGCCTGACTGGCATTGTATTAGCAAACCTCATCACTAGACATCGTACTACACGA  
CACGTACTACGTTGTAGCTCACTTCCACTATGTCTTATCA  
ATAGGAGCTGTATTTGCCATCATAGGAGGCTTCATTCCTGATTTCCCCTATTCTCAGGCTACACCCTAGACCAAACCTA  
CGCCAAAATCCATTTCACTATCATATTCATCGGCGTAAAT  
CTAACTTTCTTCCCACAACACTTTCTAGGCCTATCCGGAATGCCCCGACGTTACTCGGACTACCCCGATGCATACACCAC  
ATGAAACATCCTATCATCTGTAGGCTCATTCACTTCTCTA  
ACAGCAGTAATATTAATAATTTTTCATGATTTGAGAAGCCTTCGCTTGAAGCGAAAAGTCTAATAGTAGAAGAACCCTC  
CATAAACCTGGAGTACTATATGGATGCCCCCACCCTAC  
CACACATTCGAAGAACCCGTATACATAAAATCTAGACAAAAAGGAAGGAATCGAACCCCCCAAAGCTGGTTTTCAAGCCA  
ACCCCATGGCCTCCATGACTTTTTTCAAAAAGGTATTAGAA  
AAACCATTTCATAACTTTGTCAAAGTTAAATTATAGGCTAAATCCTATATATCTTAATGGCACATGCAGCGCAAGTAGGT  
CTACAAGACGCTACTTCCCCTATCATAGAAGAGCTTATCA  
CCTTTTCATGATCACGCCCTCATAATCATTTCCTTATCTGCTTCTTAGTCTGTATGCCCTTTTCTAACACTCACAACA  
AAACTAACTAATACTAACATCTCAGACGCTCAGGAAATAG  
AAACCGTCTGAACCTATCTTCCCAGCCATCATCTAGTCTCATCGCCCTCCCATCCCTACGCATCCTTTACATAACAGAC  
GAGGTCAACGATCCCTCCCTTACCATCAAATCAATTGGCC  
ACCAATGGTACTGAACCTACGAGTACACCGACTACGGCGGACTAATCTTCAACTCCTACATACTTCCCCATTATTCTTA  
GAACCAGGCGACCTGCGACTCCTTGACGTTGACAATCGAG  
TAGTACTCCCGATTGAAGCCCCCATTTCGTATAATAATTACATCACAAGACGTCTTGCCTCATGAGCTGTCCCCACATTA  
GGCTTAAAAACAGATGCAATTCCCGGACGTCTAAACCAA  
CCACTTTACCAGCTACACGACCGGGGTATACTACGGTCAATGCTCTGAAATCTGTGGAGCAAACCACAGTTTTCATGCC  
ATCGTCTTAGAATTAATTCCCCTAAAAATCTTTGAAATAG  
GGCCCGTATTTACCCTATAGCACCCCTCTACCCCTCTAGAGCCACTGTAAAGCTAACTTAGCATTAACTTTTAAGT  
TAAAGATTAAGAGAACCAACACCTCTTTACAGTGAATGC  
CCCAACTAAATACTACCGTATGGCCACCATAATTACCCCATACTCCTTACACTATTCTCATACCCAATAAAAATA  
TTAAACACAACTACCACCTACCTCCCTCACAAAGCCCA  
TAAAAATAAAAAATTATAACAAACCCTGAGAACCAAAATGAACGAAAATCTGTTTCGCTTCATTCATTGCCCCACAATCC  
TAGGCCTACCCGCCACAGTACTGATCATTCTATTTCCCC  
TCTATTGATCCCCACCTCCAAATATCTCATCAACAACCGACTAATCACCACCCAACAATGACTAATCAAACCTAACCTCAA  
AACAAATGATAGCCATACACAACACTAAAGGACGAACCTG  
ATCTCTTATACTAGTATCCTTAATCATTTTTTATTGCCACAATAACCTCCTCGGACTCCTGCCTCACTCATTTACACCAA  
CCACCAACTATCTATAAACCTAGCCATGGCCATCCCCTT  
ATGAGCGGGCGCAGTGATTATAGGCTTTTCGCTCTAAGATTAATAATGCCCCTAGCCACTTCTTACCACAAGGCACACCTA  
CACCCCTTATCCCCATACTAGTTATTATCGAAACCATCAG  
CCTACTCATTCAACCAATAGCCCTGGCCGTACGCTAACCCTAACATTACTGCAGGCCACCTACTCATGCACCTAATTG  
GAAGCGCCACCCTAGCAATATCAACCATTAACCTTCCCTC  
TACACTTATCATCTTACAATTCTAATTCTACTGACTATCCTAGAAATCGCTGTGCCTTAAATCCAAGCCTACGTTTTTCA  
CACTTCTAGTAAGCCTCTACCTGCACGACAACACATAATG  
ACCCACCAATCACATGCCTATCATATAGTAAACCCAGTCCATGACCCCTAACAGGGGCCCTCTCAGCCCTCCTAATGAC  
CTCCGGCCTAGCCATGTGATTTCACTTCCACTCCATAACG  
CTCCTCATACTAGGCCTACTAACCAACACACTAACCATATACCAATGATGGCGGATGTAACACGAGAAAGCACATACCA  
AGGCCACCACACACCACCTGTCCAAAAGGCCTTCGATAC

GGGATAATCCTATTTATTACCTCAGAAGTTTTTTTTCTTCGCAGGATTTTTCTGAGCCTTTTACCACTCCAGCCTAGCCCC  
TACCCCCCAACTAGGGGGGCACTGGCCCCAACAGGCATC  
ACCCCGCTAAATCCCCTAGAAGTCCCCTCCTAAACACATCCGTATTACTCGCATCAGGAGTATCAATCACCTGAGCTCA  
CCATAGTCTAATAGAAAAACAACCGAAACCAAATAATTCAA  
GCACTGCTTATTACAATTTTACTGGGTCTCTATTTTACCCTCCTACAAGCCTCAGAGTACTTCGAGTCTCCCTTACCAT  
TTCCGACGGCATCTACGGCTCAACATTTTTTTGTAGCCACA  
GGCTTCCACGGACTTCACGTCATTATTGGCTCAACTTTTCTCCTACTATCTGCTTCATCCGCCAACTAATATTTCACTTTAC  
ATCCAAACATCACTTTGGCTTCGAAGCCGCCGCCTGATAC  
TGGCATTTTGTAGATGTGGTTTACTATTTCTGTATGTCTCCATCTATTGATGAGGGTCTTACTCTTTTAGTATAAATAG  
TACCGTTAACTTCCAATTAAGTATTTTGTAGCAACATTCAA  
AAAAGAGTAATAAACTTCGCCTTAATTTTAATAATCAACACCCCTCCTAGCCTTACTACTAATAATTATTACATTTTACT  
ACCACAACCTCAACGGCTACATAGAAAAATCCACCCCTTAC  
GAGTGCAGCTTCGACCCTATATCCCCCGCCGCTCCCTTTCTCCATAAAATTCTTCTTAGTAGCTATTACCTTCTTATT  
ATTTGATCTAGAAATTGCCCTCCTTTTTACCCCTACCATGA  
GCCCTACAAACAATAACCTGCCACTAATAGTTATGTCATCCCTCTTATTAATCATCATCCTAGCCCTAAGTCTGGCCTA  
TGAGTGACTACAAAAAGGATTAGACTGAGCTGAATTGGTA  
TATAGTTTAAACAAAACGAATGATTTTCGACTCATTAAATTATGATAATCATATTTACCAAATGCCCTCATTACATAAA  
TATTATACTAGCATTACCATCTCACTTCTAGGAATACTA  
GTATATCGCTCACACCTCATATCCTCCCTACTATGCCTAGAAGGAATAATACTATCGCTGTTTATTATAGCTACTCTCAT  
AACCTCAACACCCACTCCCTCTTAGCCAATATTGTGCCT  
ATTGCCATACTAGTCTTTGCCGCCTGCGAAGCAGCGGTGGGCTAGCCCTACTAGTCTCAATCTCCAACACATATGGCCT  
AGACTACGTACATAACCTAAACCTACTCCAATGCTAAAAC  
TAATCGTCCCAACAATTATATTACTACCCTGACATGACTTTCCAAAAACACATAATTTGAATCAACACAACCACCCAC  
AGCCTAATTATTAGCATCATCCCCCTACTATTTTTTAACC  
AAATCAACAACAACCTATTTAGCTGTTCCCAACCTTTTCTCCGACCCCTAACAACCCCTCCTAATACTAACTACC  
TGACTCCTACCCCTCACAATCATGGCAAGCCAACGCCACT  
TATCCAGTGAACCACTATCACGAAAAAACTCTACCTCTCTATACTAATCTCCCTACAAATCTCCTTAATTATAACATTC  
ACAGCCACAGAATAATCATATTTTATATCTTCTTCGAAA  
CCACACTTATCCCCACCTTGGCTATCATACCCGATGAGGCAACCAGCCAGAACGCCTGAACGCAGGCACATACTTCTTA  
TTCTACACCCTAGTAGGCTCCCTTCCCCTACTCATCGCAC  
TAATTTACTACTCACAACACCCTAGGCTCACTAAACATTCTACTACTCACTCTCACTGCCCAAGAACTATCAAACCTCTGA  
GCCAACAACCTTAATATGACTAGCTTACACAATAGCTTTTTA  
TAGTAAAGATACCTCTTTACGGACTCCACTTATGACTCCCTAAAGCCCATGTGCAAGCCCCCATCGCTGGGTCAATAGTA  
CTTGCCGCAGTACTCTTAAACTAGGCGGCTATGGTATAA  
TACGCCTCACACTCATTCTCAACCCCTGACAAAACACATAGCCTACCCCTTCTTGTACTATCCCTATGAGGCATAATT  
ATAACAAGCTCCATCTGCCTACGACAAAACAGACCTAAAAT  
CGCTCATTGCATACTCTTCAATCAGCCACATAGCCCTCGTAGTAACAGCCATTCTCATCCAAACCCCTGAAGCTTACC  
GGCGCAGTCACTTCTATAATCGCCACGGACTTACATCCT  
CATTACTATTCTGCCTAGCAAACCTCAAACCTACGAACGCCTCACAGTCGCATCATAATCCTCTCTCAAGGACTTCAAAC  
CTACTCCCACTAATAGCTTTTTGATGACTTCTAGCAAGCC  
TCGCTAACCTCGCCTTACCCCTCACTATTAACCTACTGGGAGAACTCTCTGTGCTAGTAACCACATTCTCCTGATCAAAT  
ATCACTCTCCTACTTACAGGACTCAACATACTAGTCACAA  
CCCTATACTCCCTCTACATATTTACCACAACACAATGGGGCTCACTCACCCACCACATTAACAACATAAAACCCCTCATTC  
ACACGAGAAAACACCCTCATGTTCCATACACCTATCCCCCA  
TTCTCCTCTATCCCTCAACCCCGACATCATTACCGGGTTTTCTCTTGTAAATATAGTTTTAACAAAACATCAGATTGT  
GAATCTGACAACAGAGGCTTACGACCCCTTATTTACCGAG  
AAAGCTCACAAGAAGTCTAATCATGCCCCCATGTCTAACAACATGGCTTTTCTCAACTTTTTAAAGGATAACAGCTATCC  
ATTGGTCTTAGGCCCCAAAAATTTTGGTGCAACTCCAAT  
AAAAGTAATAACCATGCACACTACTATAACCACCCTAACCTGACTTCCCTAATTCCCCCATCCTTACCACCCTCGTTA  
ACCCTAACAAAAAAACTCATACCCCTATTATGTAAAATC  
CATTGTGCATCCACCTTTATTATCAGTCTCTTCCCCACAACAATATTCATGTGCCTAGACCAAGAAGTTATTATCTCGA  
ACTGACACTGAGCCACAACCCAAACAACCCAGCTCTCCCT  
AAGCTTCAAACCTAGACTACTTCTCCATAATATTCATCCCTGTAGCATTGTTGTTACATGGTCCATCATAGAATTCTCAC  
TGTGATATATAAACTCAGACCCAAACATTAATCAGTTCTT  
CAAATATCTACTCATTTTTCTAATTACCATACTAATCTTAGTTACCGCTAACAACCTATTCCAAGTTCATCGGCTGAG  
AGGGCGTAGGAATTATATCCTTCTTGCTCATCAGTTGATG

ATACGCCCGAGCAGATGCCAACACAGCAGCCATTCAAGCAATCCTATAACAACCGTATCGGCGATATCGGTTTCATCCTCG  
CCTTAGCATGATTTATCCTACACTCCAACCTCATGAGACCC  
ACAACAAATAGCCCTTCTAAACGCTAATCCAAGCCTCACCCACTACTAGGCCTCCTCCTAGCAGCAGCAGGCAAATCAG  
CCCAATTAGGTCTCCACCCCTGACTCCCCTCAGCCATAGA  
AGGCCCCACCCAGTCTCAGCCCTACTCCACTCAAGCACTATAGTTGTAGCAGGAATCTTCTTACTCATCCGCTTCCACC  
CCCTAGCAGAAAATAGCCCCTAATCCAACTCTAACACT  
ATGCTTAGGCGCTATCACCCTCTGTTTCGAGCAGTCTGCGCCCTTACACAAAATGACATCAAAAAAATCGTAGCCTTCT  
CCACTTCAAGTCAGCTAGGACTCATAATAGTTACAATCGG  
CATCAACCAACCACACCTAGCATTCTGCACATCTGTACCCACGCCTTCTTCAAAGCCATACTATTTATGTGCTCCGGGT  
CCATCATCCACAACCTTAAACAATGAACAAGATATTCGAAA  
AATAGGAGGACTACTCAAAACCTACTCTCACTTCAACCTCCCTCACCATTGGCAGCCTAGCATTAGCAGGAATACCTT  
TCCTCACAGGTTTCTACTCCAAAGACCACATCATCGAAAC  
CGCAAACATATCATAACAAACGCCTGAGCCCTATCTATTACTCTCATCGCTACCTCCCTGACAAGCGCCTATAGCACTC  
GAATAATTCTTCTCACCCCTAACAGGTCAACCTCGCTTCCC  
CACCCCTTACTAACATTAACGAAAATAACCCACCCCTACTAAACCCCATTAACGCCTGGCAGCCGGAAGCCTATTTCGCAG  
GATTTCTCATTACTAACAACATTTCCCCCGCATCCCCCTT  
CCAAACAACAATCCCCCTTACCTAAAACCTCACAGCCCTCGCTGTCACTTTCTTAGGACTTCTAACAGCCCTAGACCTCA  
ACTACCTAACCAACAAACTTAAAATAAAATCCCCACTATG  
CACATTTTATTTCTCCAACATACTCGGATTCTACCCTAGCATCACACACCCGCACAATCCCCTATCTAGGCCTTCTTACGA  
GCCAAAACCTGCCCTACTCCTCCTAGACCTAACCTGACT  
AGAAAAGCTATTACCTAAAACAATTTACAGCACCAAATCTCCACCTCCATCATCACCTCAACCCAAAAGGCATAATTA  
AACTTTACTTCTCTTTTCTTCTTCCACTCATCCTAAC  
CCTACTCCTAATCACATAACCTATTCCCCCGAGCAATCTCAATTACAATATATACACCAACAAACAATGTTCAACCAGTA  
ACTACTACTAATCAACGCCATAATCATACAAAGCCCCCG  
CACCAATAGGATCCTCCCGAATCAACCCTGACCCCTCTCCTTCATAAATTATTCAGCTTCTTACTACTAAAGTTTACC  
ACAACCACCACCCCATCATACTCTTTCACCCACAGCACCA  
ATCCTACCTCCATCGCTAACCCCACTAAAACCTCACCAAGACCTCAACCCCTGACCCCATGCCTCAGGATACTCCTCA  
ATAGCCATCGTGTAGTATATCCAAAGACAACCATCATT  
CCCCTAATAAATTAATAAAACTATTAACCCATATAACCTCCCCAAAATTGAGAATAATAACACACCCGACCACACCG  
CTAACAATCAATACTAAACCCCAATAAATAGGAGAAGGCT  
TAGAAGAAAACCCCAAAACCCCACTAAACCCCACTCAACAGAAAACAAAGCATAACATCATTATTCTCGCACGGACT  
ACAACCACGACCAATGATATGAAAAACCATCGTTGTATTT  
CAACTACAAGAACACCAATGACCCCAATACGAAAATTAACCCCTAATAAAACTAATTAACCACTCATTTCATCGACCTC  
CCCACCCCATCCAACATCTCCGCATGATGAAACTTCGGCT  
CACTCCTTGGCGCCTGCCTGATCCTCCAAATCACACAGGACTATTCTAGCCATGCACTACTCACAGACGCCTCAACC  
GCCTTTTTCATCAATCGCCACATCACTCGAGACGTAAATT  
ATGGCTGAATCATCCGCTACCTTACGCCAATGGCGCCTCAATATTCTTTATCTGCCTCTTCTACACATCGGACGAGGC  
CTATATTACGGATCATTTCTCTACTCAGAAACCTGAAACA  
TCGGCATTATCCTCCTGCTTGCAACTATAGCAACAGCCTTCATAGGCTATGTCTCCCGTGAGGCCAAATATCATTCTGA  
GGGGCCACAGTAATTACAACTTACTATCCGCCACCCCAT  
ACATTGGGACAGACCTAGTTCAATGAATCTGAGGAGGCTACTCAGTAGACAGTCCCACCCTCACACGATTCTTTACCTTT  
CACTTCATCTTACCCTTCATTATTGCAGCCCTAGCAGCAC  
TCCACCTCCTATTCTTGCACGAAACGGGATCAAAACACCCCTTAGGAATCACCTCCCATTCCGATAAAATCACCTTCCAC  
CCTTACTACACAATCAAAGACGCCCTCGGCTTACTTCTCT  
TCCTTCTCTCCTTAATGACATTAACACTATTCTCACCTGACCTCCTAGGCGACCCAGACAATTATACCCTAGCCAACCC  
TTAAACACCCCTCCCCACATCAAGCCCGAATGATATTTCC  
TATTGCGCTACACAATTTCTCCGATCCGTCCCTAACAAACTAGGAGGCGTCTTGCCTTATTACTATCCATCCTCATCCTA  
GCAATAATCCCCATCCTCCATATATCCAAACAACAAAGCA  
TAATATTTGCGCCACTAAGCCAATCACTTTATTGACTCCTAGCCGAGACCTCCTCATTCTAACCTGAATCGGAGGACAA  
CCAGTAAGCTACCCTTTTACCATCATTGGACAAGTAGCAT  
CCGTACTATACTTCAACAATCCTAATCCTAATACCAACTATCTCCCTAATTGAAAACAAAATACTCAAATGGGCCTGT  
CCTTGTAGTATAAACTAATACACCAGTCTTGTAAACCGGA  
GATGAAAACCTTTTTTCCAAGGACAAATCAGAGAAAAAGTCTTTAACTCCACCATTAGCACCCAAAGCTAAGATTCTAATT  
TAAACTATT

#ASIA Chinese

CCACAGTTTATGTAGCTTACCTCCTCAAAGCAATACACTGAAAATGTTTGTAGACGGGCTCACATCACCCCATAAACAAATA  
GGTTTGGTCTTAGCCTTTCTATTAGCTCTTAGTAAGATTA  
CACATGCAAGCATCCCCGTTCCAGTGAGTTCCACCTCTAAATCACCACGATCAAAGGGACAAGCATCAAGCACGCAGCA  
ATGCAGCTCAAACGCTTAGCCTAGCCACACCCCCACGGG  
AAACAGCAGTGATTAACCTTTAGCAATAAACGAAAGTTTAACTAAGCTATACTAACCACAGGGTTGGTCAATTTTCGTGCC  
AGCCACCGCGGTACACAGATTAACCCAAGTCAATAGAAGC  
CGGCGTAAAGAGTGTTTTAGATCACCCCTCCCCAATAAAGCTAAAACCTCACCTGAGTTGTAAAAAACTCCAGTTGACAC  
AAAATAGACTACGAAAGTGGCTTTAACATATCTGAACACA  
CAATAGCTAAGACCCAAACTGGGATTAGATACCCCACTATGCTTAGCCCTAAACCTCAACAGTTAAATCAACAAAACCTGC  
TCGCCAGAACACTACGAGCCACAGCTTAAAACCTCAAAGGA  
CCTGGCGGTGCTTCATATCCCTCTAGAGGAGCCTGTTCTGTAATCGATAAACCCCGATCAACCTCACACCTCTTGCTCA  
GCCTATATACCGCCATCTTCAGCAAACCTGATGAAGGCT  
ACAAAGTAAGCGCAAGTACCCACGTAAAGACGTTAGGTCAAGGTGTAGCCCATGAGGTGGCAAGAAATGGGCTACATTTT  
CTACCCAGAAAACCTACGATAGCCCTTATGAAACTTAAGG  
GTCGAAGGTGGATTTAGCAGTAAACTGAGAGTAGAGTGCTTAGTTGAACAGGGCCCTGAAGCGCGTACACACCGCCCGTC  
ACCCTCCTCAAGTATACTTCAAAGGACATTTAACTAAAAC  
CCCTACGCATTTATATAGAGGAGACAAGTCGTAACATGGTAAGTGTACTGGAAAGTGCACCTTGGACGAACCAGAGTGTAG  
CTTAACACAAAGCACCCAACTTACACTTAGGAGATTTCAA  
CTTAACTTGACCGCTCTGAGCTAAACCTAGCCCCAAACCCACTCCACCTTACTACCAGACAACCTTAGCCAAACCATTTA  
CCCAAATAAAGTATAGGCGATAGAAATTGAAACCTGGCGC  
AATAGATATAGTACCGCAAGGGAAAGATGAAAAATTATAACCAAGCATAATATAGCAAGGACTAACCCCTATACCTTCTG  
CATAATGAATTAAGTAACTAGAAATAACTTTGCAAGGAGAGCCA  
AAGCTAAGACCCCCGAAACCAGACGAGCTACCTAAGAACAGCTAAAAGAGCACACCCCGTCTATGTAGCAAAATAGTGGGA  
AGATTTATAGGTAGAGGCGACAAACCTACCGAGCCTGGTG  
ATAGCTGGTTGTCCAAGATAGAATCTTAGTTCAACTTTAAATTTGCCACAGAACCCTCTAAATCCCCTTGTAATTTAA  
CTGTTAGTCCAAAGAGGAACAGCTCTTTGGACACTAGGAA  
AAAACCTTGTAGAGAGAGTAAAAAA-  
TTTAACACCCATAGTAGGCCTAAAAGCAGCCACCAATTAAGAAAGCGTTCAAGCTCAACACCCACTACCTAAAAAA-  
TCCCAAACATATAACTG  
AACTCCTCACACCCAATTGGACCAATCTATCACCTATAGAAGAATAATGTTAGTATAAGTAACATGAAAACATTCTCC  
TCCGCATAAGCCTGCGTCAGATTAAAAACACTGAACTGACA  
ATTAACAGCCCAATATCTACAATCAACCAACAAGTCATTATTACCCTCACTGTCAACCCAACACAGGCATGCTCATAAGG  
AAAGGTTAAAAAAGTAAAAGGAACCTCGGCAAATCTTACC  
CCGCCTGTTTACCAAAAACATCACCTCTAGCATCACAGTATTAGAGGCACCGCCTGCCAGTGACACATGTTTAAACGGC  
CGCGGTACCCTAACCGTGCAAAGGTAGCATAATCACTTGT  
TCCTTAAATAGGGACCTGTATGAATGGCTCCACGAGGGTTCCAGCTGTCTCTTACTTTTTAACAGTGAAATTGACCTGCC  
GTGAAGAGGCGGGCATGACACAGCAAGACGAGAAGACCCT  
ATGGAGCTTTAATTTATTAATGCAAACAGTACCTAACAAACCCACAGGTCTAAACTACCAAACCTGCATTAATAATTTT  
GGTTGGGGCGACCTCGGAGCAGAACCCAACCTCCGAGCAG  
TACATGCTAAGACTTCACCAGTCAAAGCGAACTACTATACTCAATTGATCCAATAACTTGACCAACGGAACAAGTTACCC  
TAGGGATAACAGCGCAATCCTATTCTAGAGTCCATATCAA  
CAATAGGGTTTACGACCTCGATGTTGGATCAGGACATCCCGATGGTGCAGCCGCTATTAAGGTTTCGTTTGTTCACCGAT  
TAAAGTCTACGTGATCTGAGTTCAGACCGGAGTAATCCA  
GGTCGGTTTCTATCTACTTCAAATTCCTCCCTGTACGAAAGGACAAGAGAAATAAGGCCTACTTCACAAAGCGCCTTCCC  
CCGTAAATGATATCATCTCAACTTAGTATTATACCCACAC  
CCACCCAAGAACAGGGTTTGTAAAGATGGCAGAGCCCGGTAATCGCATAAACTTAAAACCTTACAGTCAGAGGTTCAAC  
TCCTCTTCTTAAACAACATACCCATGACCAACCTCCTACTC  
CTCATTGTACCCATTCTAATCGCAATGGCATTCTAATGCTTACCGAACGAAAAATTCTAGGCTATATACAACCTACGCAA  
AGGCCCAACGTTGTAGGCCCTACGGGCTACTACAACCC  
TTGCTGACGCCATAAACTCTTACCAAAGAGCCCTAAAACCCGCCACATCTACCATCACCTCTACATCACCGCCCC  
GACCTTAGCTCTCACCATCGCTCTTCTACTATGAACCCCC  
CTCCCCATACCCAACCCCTGGTCAACCTCAACCTAGGCCTCCTATTTATTCTAGCCACCTCTAGCCTAGCCGTTTACTC  
AATCCTCTGATCAGGGTGAGCATCAAACCTCAAACCTACGCC  
CTGATCGGCGCACTGCGAGCAGTAGCCCAAACAATCTCATATGAAGTCACCCTAGCCATCATTCTACTATCAACATTACT  
AATAAGTGGCTCCTTTAACCTCTCCACCCTTATCACAACA  
CAAGAACACCTCTGATTACTCCTGCCATCATGACCCTTGCCATAATATGATTTATCTCCACACTAGCAGAGACCAACCG  
AACCCCTTCGACCTTGCCGAAGGGGAGTCCGAACCTAGTC

TCAGGCTTCAACATCGAATACGCCGAGGCCCTTCGCCTTATTCTTCATAGCCGAATACACAAACATTATTATAATAAA  
CACCTCACCCTACAATCTTCTAGGAACAACATATGAC  
GCACTCTCCCCTGAACTCTACACAACATATTTTTGTACCAAGACCCTACTTCTAACCTCCCTGTTCTTATGAATTCGAAC  
AGCATACCCCGATTCCGCTACGACCAACTCATAACCTC  
CTATGAAAAAATTCTACCCTCACCCTAGCATTACTTATATGATATGTCTCCATACCCATTACAATCTCCAGCATTCC  
CCCTCAAACCTAAGAAATATGTCTGATAAAAGAGTTACTT  
TGATAGAGTAAATAATAGGAGCTTAAACCCCTTATTTCTAGGACTATGAGAATCGAACCCTCCCTGAGAATCCAAAAT  
TCTCCGTGCCACCTATCACACCCCATCCTAAAGTAAGGTC  
AGCTAAATAAGCTATCGGGCCCATACCCCGAAAATGTTGGTTATACCCTTCCCGTACTAATTAATCCCCTGGCCCAACCC  
GTCATCTACTCTACCATCTTTACAGGCACACTCATCACAG  
CGCTAAGCTCGCACTGATTTTTTACCTGAGTAGGCCTAGAAAATAAACATGCTAGCTTTTTATTCCAGTTCTAACCAAAAA  
ATAAACCCCTCGTTCCACAGAAGCTGCCATCAAGTATTTCC  
TCACGCAAGCAACCGCATCCATAATCCTTCTAATAGCTATCCTCTTCAACAATATACTCTCCGGACAATGAACCATAACC  
AATACTACCAATCAATACTCATCATTATAATAATCATAATGG  
CTATAGCAATAAAACTAGGAATAGCCCCCTTTCACTTCTGAGTCCCAGAGGTTACCCAAGGCACCCCTCTGACATCCGGC  
CTGCTTCTTCTCACATGACAAAAACTAGCCCCCATCTCAA  
TCATATACCAAATCTCTCCCTCACTAAACGTAAGCCTTCTCCTCACTCTCTCAATCTTATCCATCATAGCAGGCAGTTGA  
GGTGGATTAAACCAAACCCAGCTACGCAAAATCTTAGCAT  
ACTCCTCAATTACCCACATAGGATGAATAATAGCAGTTCTACCGTACAACCCTAACATAACCATTCTTAATTTAACTATT  
TATATTATCCTAACTACTACCGCATTCTACTACTCAACT  
TAAACTCCAGCACCACGACCCTACTACTATCTCGCACCTGAAACAAGCTAACATGACTAACACCCTTAATTCCATCCACC  
CTCCTCTCCCTAGGAGGCCTGCCCCGCTAACCGGCTTTT  
TGCCCAAATGGGTCATTATCGAAGAATTCACAAAAACAATAGCCTCATCATCCCCACCATCATAGCCACCATCACCCCTC  
CTTAACCTCTACTTCTACCTACGCCTAATCTACTCCACCT  
CAATCACACTACTCCCCATATCTAACACGTAATAAATAAATGACAGTTTGAACATACAAAACCCACCCCATTCCTCCCC  
ACACTCATCGCCCTTACCACGCTACTCCTACCTATCTCCC  
CTTTTATACTAATAATCTTATAGAAAATTTAGGTTAAATACAGACCAAGAGCCTTCAAAGCCCTCAGTAAGTTGCAATACT  
TAATTTCTGTAACAGCTAAGGACTGCAAAACCCCACTCG  
CATCAACTGAACGCAAAATCAGCCACTTTAATTAAGCTAAGCCCTTACTAGACCAATGGGACTTAAACCCACAAACTTA  
GTTAACAGCTAAGCACCTAATCAACTGGCTTCAATCTAC  
TTCTCCCGCCGCGGGAAAAAAGGCGGGAGAAGCCCCGCGAGGTTTGAAGCTGCTTCTTGAATTTGCAATTCATATGA  
AAATCACCTCGGAGCTGGTAAAAAGAGGCCTAACCCCTGT  
CTTTAGATTTACAGTCCAATGCTTCACTCAGCCATTTTACCTCACCCCC-  
ACTGATGTTGCGCCGACCGTTGACTATTCTCTACAAACCACAAAGACATTGGAACACTATACTATTATTC  
GGCGCATGAGCTGGAGTCTTAGGCACAGCTCTAAGCCTCCTTATTCGAGCCGAGCTGGGCCAGCCAGGCAACCTTCTAGG  
TAACGACCACATCTACAACGTTATCGTACAGCCCATGCA  
TTTGTAAATAATCTTCTTCATAGTAATACCCATCATAATCGGAGGCTTTGGCAACTGACTAGTTCCCCTAATAATCGGTGC  
CCCCGATATGGCGTTTCCCCGCATAAACAACATAAGCTTC  
TGACTCTTACCTCCCTCTCTCCTACTCCTGCTCGCATCTGCTATAGTGGAGGCCGGAGCAGGAACAGGTTGAACAGTCTA  
CCCTCCCTTAGCAGGGAATACTCCACCCCTGGAGCCTCC  
GTAGACCTAACCATCTTCTCCTTACACCTAGCAGGTGTCTCCTCTATCTTAGGGGCCATCAACTTCATCACAAACAATTAT  
CAATATAAAACCCCTGCCATAACCCAATACCAAACGCCC  
CTCTTCGTCTGATCCGTCTAATCACAGCAGTCTACTTCTCCTATCTCTCCAGTCTTAGCTGCTGGCATCACTATACT  
ACTAACAGACCGCAACCTCAACACCACCTTCTTCGACCCC  
GCCGGAGGAGGAGACCCATTCTATACCAACACCTATTCTGATTTTTCGGTCACCCTGAAGTTTATATTCTTATCCTACC  
AGGCTTCGGAATAATCTCCCATATTGTAACCTTACTACTCC  
GGAAAAAAGAACCATTTGGATACATAGGTATGGTCTGAGCTATGATATCAATTGGCTTCTTAGGTTTTATCGTGTGAGC  
ACACCATATATTTACAGTAGGAATAGACGTAGACACACGA  
GCATATTTACCTCCGCTACCATAATCATCGCTATCCCCACCGCGTCAAAGTATTTAGCTGACTCGCCACACTCCACGG  
AAGCAATATGAAATGATCTGCTGCAGTGTCTGAGCCCTA  
GGATTCATCTTTCTTTTACCCTAGGTGGCCTGACTGGCATTGTATTAGCAAACCTCATCACTAGACATCGTACTACACGA  
CACGTACTACGTTGTAGCTCACTTCCACTATGTCCTATCA  
ATAGGAGCTGTATTTGCCATCATAGGAGGCTTCATTCCTGATTTCCCTATTCTCAGGCTACACCCTAGACCAAACCTA  
CGCCAAAATCCATTTCACTATCATATTCATCGGCGTAAAT  
CTAACTTTCTTCCACAACACTTTCTCGGCCTATCCGGAATGCCCCGACGTTACTCGGACTACCCCGATGCATACACCAC  
ATGAAACATCCTATCATCTGTAGGCTCATTCAATTTCTCTA

ACAGCAGTAATATTAATAATTTTTATGATTTGAGAAGCCTTCGCTTCGAAGCGAAAAGTCTAATAGTAGAAGAACCCTC  
CATAAACCTGGAGTGACTATATGGATGCCCCCACCCTAC  
CACACATTCGAAGAACCCGTATACATAAAAATCTAGACAAAAAGGAAGGAATCGAACCCCCAAAGCTGGTTTTCAAGCCA  
ACCCCATGGCCTCCATGACTTTTTCAAAAAGGTATTAGAA  
AAACCATTTTCATAACTTTGTCAAAGTTAAATCATAGGCTAAATCCTATATATCTTAATGGCACATGCAGCGCAAGTAGGT  
CTACAAGACGCTACTTCCCCTATCATAGAAGAGCTTATCA  
CCTTTTCATGATCACGCCCTCATAATCATTTCCTTATCTGCTTCCCTAGTCTGTATGCCCTTTTCCTAACACTCACAACA  
AAACTAACTAATACTAACATCTCAGACGCTCAGGAAATAG  
AAACCGTCTGAACTATCCTGCCCGCCATCATCCTAGTCTCATCGCCCTCCCATCCCTACGCATCCTTTACATAACAGAC  
GAGGTCAACGATCCCTCCCTTACCATCAAATCAAATGGCC  
ACCAATGGTACTGAACCTACGAGTACACCGACTACGGCGACTAATCTTCAACTCCTACATACTTCCCCATTATTCTTA  
GAACCAGGCGACTGCGACTCCTTGACGTTGACAATCGAG  
TAGTACTCCCGATTGAAGCCCCCATTTCGTATAATAATTACATCACAAGACGCTTTCGACTCATGAGCTGTCCCCACATTA  
GGCTTAAAAACAGATGCAATTTCCCGACGCTTAAACCAA  
CCACTTTTACCCTACACGACCGGGGTATACTACGGTCAATGCTCTGAAATCTGTGGAGCAAACCACAGTTTTCATGCC  
ATCGTCTTAGAATTAATTTCCCCTAAAAATCTTTGAAATAG  
GGCCCGTATTTACCCTATAGCACCCCTCTACCCCTCTAGAGCCACTGTAAAGCTAACTTAGCATTAACTTTTTAAGT  
TAAAGATTAAGAGAACCAACACCTCTTTACAGTGAAATGC  
CCCAACTAAATACTACCGTATGGCCACCATAATTACCCCTACTCCTTACACTATTCTCATCACCAACTAAAAATA  
TTAAACACAAACTACCACCTACCTCCCTCACCAAAGCCCA  
TAAAAATAAAAAATTATAACAAACCCTGAGAACCAAAATGAACGAAAATCTGTTTCGCTTCATTATTGCCCCACAATCC  
TAGGCCTACCCGCGCAGTACTGATCATTCTATTTCCCC  
TCTATTGATCCCCACCTCCAAATATCTCATCAACAACCGACTAATCACCACCAACAATGACTAATCAAACCTAACCTCAA  
AACAAATGATAACCATAACAACTAAAGGACGAACCTG  
ATCTCTTATACTAGTATCCTTAATCATTTTTTATTGCCACAACCTAACCTCCTCGGACTCCTGCCTCACTCATTACACCAA  
CCACCAACTATCTATAAACCTAGCCATGGCCATCCCCTT  
ATGAGCGGGCGCAGTGATTATAGGCTTTTCGCTCTAAGATTAATAATGCCCCTAGCCACTTCTTACCACAAGGCACACCTA  
CACCCCTTATCCCCATACTAGTTATTATCGAAACCATCAG  
CCTACTCATTCAACCAATAGCCCTGGCCGTACGCCCTAACCGCTAACATTACTGCAGGCCACCTACTCATGCACCTAATTG  
GAAGCGCCACCCTAGCAATATCAACCATTAACCTTCCCTC  
TACACTTATCATCTTCACAATTCTAATTCTACTGACTATCCTAGAAATCGCTGTGCGCTTAATCCAAGCCTACGTTTTCA  
CACTTCTAGTAAGCCTCTACCTGCACGACAACACATAATG  
ACCCACCAATCACATGCCTATCATATAGTAAACCCAGCCCATGACCCCTAACAGGGGCCCTCTCAGCCCTCCTAATGAC  
CTCCGGCCTAGCCATGTGATTTCACTTCCACTCCATAACG  
CTCCTCATACTAGGCCTACTAACCAACACACTAACCATATACCAATGATGGCGGATGTAACACGAGAAAGCACATACCA  
AGGCCACCACACACCACCTGTCCAAAAAGGCCTTCGATAC  
GGGATAATCCTATTTATTACCTCAGAAGTTTTTTTTCTTCGAGGATTTTTCTGAGCCTTTTACCCTCCAGCCTAGCCCC  
TACCCCAATTAGGAGGGCACTGGCCCCAACAGGCATC  
ACCCCGCTAAATCCCCTAGAAGTCCCACTCCTAAACACATCCGTATTACTCGCATCAGGAGTATCAATCACCTGAGCTCA  
CCATAGTCTAATAGAAAACAACCGAAACCAATAATTCAA  
GCACTGCTTATTACAATTTTACTGGGTCTCTATTTTACCCTCCTACAAGCCTCAGAGTACTTCGAGTCTCCCTTACCAT  
TTCCGACGGCATCTACGGCTCAACATTTTTTTGTAGCCACA  
GGCTTCCACGGACTTCACGTCAATTATTGGCTCAACTTTCCCTCACTATCTGCTTCATCCGCCAACTAATATTTCACTTTAC  
ATCCAAACATCACTTTGGCTTCGAAGCCGCCGCTGATAC  
TGGCATTTTGTAGATGTGGTTTACTATTTCTGTATGTCTCCATCTATTGATGAGGGTCTTACTCTTTTAGTATAAATAG  
TACCGTTAACTTCAAATTAAGTATTTTGGACAACATTCAA  
AAAAGAGTAATAAACTTCGCCTTAATTTTTAATAATCAACACCCTCCTAGCCTTACTACTAATAATTATTACATTTTACT  
ACCACAACCTCAACGGCTACATAGAAAAATCCACCCCTTAC  
GAGTGCAGCTTCGACCCTATATCCCCCGCCGCTCCCTTTCTCCATAAAATTTCTTCTTAGTAGCTATTACCTTCTTATT  
ATTTGATCTAGAAATTGCCCTCCTTTTACCCTACCATGA  
GCCCTACAAACAACCTAACCTAACCTAATAGTTATGTCATCCCTCTTATTAATCATCATCCTAGCCCTAAGTCTGGCCTA  
TGAGTACTACAAAAAGGATTAGACTGAACCGAATTGGTA  
TATAGTTTTAAACAAAACGAATGATTTGACTCATTAAATTATGATAATCATATTTACCAATGCCCTCATTACATAAA  
TATTATACTAGCATTACCATCTCACTTCTAGGAATACTA  
GTATATCGCTCACACCTCATATCCTCCCTACTATGCCTAGAAGGAATAATACTATCGCTGTTTATTATAGCTACTCTCAT  
AACCTCAACACCCACTCCCTCTTAGCCAATATTGTGCCT

ATTGCCATACTAGTCTTTGCCGCCTGCGAAGCAGCGGTGGGCCTAGCCCTACTAGTCTCAATCTCCAACACATATGGCCT  
AGACTACGTACATAACCTAAACCTACTCCAATGCTAAAAAC  
TAATCGTCCCAACAATTATATTACTACCACTGACATGACTTTCCAAAAAACACATAATTTGAATCAACACAACCACCCAC  
AGCCTAATTATTAGCATCATCCCTCTACTATTTTTTAACC  
AAATCAACAACAACCTATTTAGCTGCTCCCAACCTTTTTCTCCGACCCCTAACAAACCCCTCCTAATACTAACTACC  
TGACTCCTACCCCTCACAATCATGGCAAGCCAACGCCACT  
TATCCAGTGAACCCTATCACGAAAAAACTCTACCTCTCTATACTAATCTCCCTACAAATCTCCTTAATTATAACATTC  
ACAGCCACAGAATAATCATATTTTTATATCTTCTTCGAAA  
CCACACTTATCCCCACCTTGGCTATCATCACCCGATGAGGCAACCAGCCAGAACGCCTGAACGCAGGCACATACTTCCTA  
TTCTACACCCTAGTAGGCTCCCTTCCCCTACTCATCGCA  
TAATTTACACTCACAACACCCTAGGCTCACTAAACATTTCTACTACTCACTCTCACTGCCAAGAACTATCAAACCTCCTGA  
GCCAACAACCTTAATATGACTAGCTTACACAATAGCTTTTA  
TAGTAAAGATACCTCTTTACGGACTCCACTTATGACTCCCTAAAGCCCATGTGCAAGCCCCCATCGCTGGGTCAATAGTA  
CTTGCCGCAGTACTCTTAAAACCTAGGCGGCTATGGTATAA  
TACGCCTCACACTCATTCTCAACCCCTGACAAAACACATAGCCTACCCCTTCCCTTGTAATATCCCTATGAGGCATAATT  
ATAACAAGCTCCATCTGCCTACGACAAAACAGACCTAAAAT  
CGCTCATTGCATACTCTTCAATCAGCCACATAGCCCTCGTAGTAACAGCCATTCTCATCCAAACCCCTGAAGCTTCACC  
GGCGCAGTCACTTCTATAATCGCCCACGGACTTACATCCT  
CATTACTATTCTGCCTAGCAAACCTCAAACCTACGAACGCCTCACAGTCGCATCATAATCCTCTCTCAAGGACTTCAAACCT  
CTACTCCCACTAATAGCTTTTTGATGACTTCTAGCAAGCC  
TCGCTAACCTCGCCTTACCCCCCACTATTAACCTACTGGGAGAACTCTCTGTGCTAGTAACCACGTTCTCCTGATCAAAT  
ATCACTCTCCTACTTACAGGACTCAACATACTAGTCACAG  
CCCTATACTCCCTCTACATATTTACCACAACACAATGGGGCTCACTCACCCACCACATTAACAACATAAAAACCCCTCATTC  
ACACGAGAAAACACCCTCATGTTCCATACACCTATCCCCCA  
TTCTCCTCCTATCCCTCAACCCCGACATCATTACCGGGTTTTCCCCTTGTAATATAGTTTAAATCAAACATCAGATTGT  
GAATCTGACAACAGAGGCTTACGACCCCTTATTTACCGAG  
AAAGCTCACAAGAAGTCTAACTCATGCCCCATGTCTAACAACATGGCTTTTCTCAACTTTTTAAAGGATAACAGCTATCC  
ATTGGTCTTAGGCCCCAAAAATTTTGGTGCAACTCCAAAT  
AAAAGTAATAACCATGCACACTATAACCACCCTGACTTCCCTAATTTCCCCCATCCTTACCACCCTCGTTA  
ACCCTAACAAAAAAACTCATACCCCACTTATGTAAAATC  
CATTGTGCATCCACCTTTATTATCAGTCTCTTCCCCACAACAATATTATCATGTGCCTAGACCAAGAAGTTATTATCTCGA  
ACTGACACTGAGCCACAACCCAAACAACCCAGCTCTCCCT  
AAGCTTCAAACCTAGACTACTTCTCCATAATATTCATCCCTGTAGCATTGTTGTTACATGATCCATCATAGAATTCTCAC  
TGTGATATATAAACTCAGACCCAAACATTAATCAGTTCTT  
CAAATATCTACTCATCTTCCCTAATTACCATACTAATCTTAGTTACCGCTAACAAACCTATTCCAACCTGTTTCATCGGCTGAG  
AGGGCGTAGGAATTATATCCTTCTTGCTCATCAGTTGATG  
ATACGCCCAGCAGATGCCAACACAGCAGCCATTCAAGCAATCCTATAACAACCGTATCGGCGATATCGGTTTCATCCTCG  
CCTTAGCATGATTTATCCTACACTCCAACCTCATGAGACCC  
ACAACAATAGCCCTTCTAAACGCTAATCCAAGCCTCACCCCACTACTAGGCCTCCTCCTAGCAGCAGCAGGCAAATCAG  
CCCAATTAGGTCTCCACCCCTGACTCCCTCAGCCATAGA  
AGGCCCCACCCAGTCTCAGCCCTACTCCACTCAAGCACTATAGTTGTAGCAGGAATCTTCTTACTCATCCGCTTCCACC  
CCCTAGCAGAAAATAGCCCACTAATCCAACTCTAACACT  
ATGCTTAGGCGCTATCACCCTCTGTTGCGCAGCAGTCTGCGCCCTTACACAAAATGACATCAAAAAAATCGTAGCCTTCT  
CCACTTCAAGTCAACTAGGACTCATAATAGTTACAATCGG  
CATCAACCAACCACACCTAGCATTCTGCACATCTGTACCCACGCCTTCTTCAAAGCCATACTATTTATGTGCTCCGGGT  
CCATCATCCACAACCTTAACAATGAACAAGATATTCGAAA  
AATAGGAGGACTACTCAAACCATACCTCTCACTTCAACCTCCCTCACCACTGGCAGCCTAGCATTAGCAGGAATACCTT  
TCCTCACAGTTTTCTACTCCAAAGACCACATCATCGAAAC  
CGCAAACATATCATAACAAACGCCTGAGCCCTATCTATTACTCTCATCGCTACCTCCCTGACAAGCGCCTACAGCACTC  
GAATAATTTCTTACCCTAACAGGTCAACCTCGCTTCCC  
CACCCCTTACTAACATTAACGAAAATAACCCCACTACTAAACCCCATTAACGCCTGGCAGCCGGAAGCCTATTTCGCAG  
GATTTCTCATTACTAACAACATTTCCCCCGCATCCCCCTT  
CCAAACAACAATCCCCCTCTACCTAAAACCTCACAGCCCTCGCTGTCACTTTCTTAGGACTTCTAACAGCCCTAGACCTCA  
ACTACCTAACCAACAAACTTAAAATAAAATCCCCACTATG  
CACATTTTATTTCTCAAACATACTCGGATTCTACCCTACCATCACACACCGCACAAATCCCTATCTAGGCCTTCTTACGA  
GCCAAAACCTGCCCTACTCCTCCTAGACCTAACCTGACT

AGAAAAGCTATTACCTAAAACAATTTACAGCACCAAATCTCCACCTCCATCATCACCTCAACCCAAAAAGGCATAATTA  
AACTTTACTTCTCTCTTTCTTCTTCCCACTCATCCTAAC  
CCTACTCCTAATCACATAACCTATTCCCCGAGCAATCTCAATTACAATATATACACCAACAAACAATGTTCAACCAGTA  
ACTACTACTAATCAACGCCATAATCATACAAAGCCCCCG  
CACCAATAGGATCCTCCGAATCAACCCTGACCCCTCTCCTTCATAAATTATTAGCTTCTTACACTATTAAGTTTACC  
ACAACCACCACCCCATCATACTCTTTCACCCACAGCACCA  
ATCCTACCTCCATCGCTAACCCCACTAAAACACTCACCAAGACCTCAACCCCTGACCCCATGCCTCAGGATACTCCTCA  
ATAGCCATCGCTGTAGTATATCCAAAGACAACCATCATT  
CCCCTAAATAAATTAATAAACTATTAACCCATATAACCTCCCCAAAATTGAGAATAATAACACACCCGACCACACCG  
CTAACAAATCAATACTAAACCCCATAAATAGGAGAAGGCT  
TAGAAGAAAACCCACAAACCCATTACTAAACCCCACTCAACAGAAAACAAGCATAACATCATTATTCTCGCACGGACT  
ACAACCACGCAATGATATGAAAAACCATCGTTGTATTT  
CAACTACAAGAACACCAATGACCCCAATACGCAAAATTAACCCCTAATAAAATTAATTAACCACTCATTATCGACCTC  
CCCACCCCATCCAACATCTCCGCATGATGAACTTCGGCT  
CACTCCTTGGCGCCTGCCTGATCCTCAAATCACCACAGGACTATTCTAGCCATGCCTACTCACCAGACGCCTCAACC  
GCCTTTTTCATCAATCGCCACATCACTCGAGACGTAAATT  
ATGGCTGAATCATCCGCTACCTTACGCAATGGCGCCTCAATATTCTTTATCTGCCTCTTCTACACATCGGGCGAGGC  
CTATATTACGGATCATTCTCTACTCAGAAACCTGAAACA  
TCGGCATTATCCTCCTGCTTACAACATAGCAACAGCCTTCATAGGCTATGTCTCCCGTGAGGCCAAATATCATTCTGA  
GGGGCCACAGTAATTACAACTTACTATCCGCCATCCCAT  
ACATTGGGACAGACCTAGTTCAATGAATCTGAGGAGGCTACTCAGTAGACAGTCCCACCCTCACACGATTCTTTACCTTT  
CACTTCATCTTGCCTTTCATTATTGCAGCCCTAGCAGCAC  
TCCACCTCCTATTCTTGCACGAAACGGGATCAAACAACCCCTAGGAATCACCTCCCATTCCGATAAAATCACCTTCCAC  
CCTTACTACACAATCAAAGACGCCCTCGGCTTACTTCTCT  
TCCTTCTCTCCTTAATGACATTAACACTATTCTCACCAGACCTCCTAGGCGACCCAGACAATTATACCCTAGCCAACCC  
TTAAACACCCCTCCCCACATCAAGCCCGAATGATATTTCC  
TATTGCCTACACAATTCTCCGATCCGTCCCTAACAACTAGGAGGCGTCTTGCCTATTACTATCCATCCTCATCCTA  
GCAATAATCCCCACTCTCCACATATCCAAACAACAAGCA  
TAATATTTGCGCCACTAAGCCCACTTTTATTGACTCCTAGCCGACAGCTCCTCATTCTAACCTGAATCGGAGGACAA  
CCAGTAAGCTACCCTTTTACCATCATTGGACAAATAGCAT  
CCGTAATACTTACAAACAATCCTAATCCTAATACCAACTATCTCCCTAATTGAAAAAAAATACTCAAATGGGCCTGT  
CCTTGATAGTATAAACTAATACACCAGTCTTGTAACCGGA  
GATGAAAACCTTTTTTCCAAGGACAAATCAGAGAAAAAGTCTTTAACTCCACCATTAGCACCCAAAGCTAAGATTCTAATT  
TAACTATT

#ASIA Chuckchi

CCACAGTTTTATGTAGCTTACCTCCTCAAAGCAATACACTGAAAATGTTTAGACGGGCTCACATCACCCCATAAACAATA  
GGTTTGGTCTGGCCTTTCTATTAGCTCTTAGTAAGATTA  
CACATGCAAGCATCCCCGTTCCAGTGAGTTACCCTCTAAATCACCACGATCAAAGGGACAAGCATCAAGCACGCAGCA  
ATGCAGCTCAAACGCTTAGCCTAGCCACACCCCCACGGG  
AAACAGCAGTGATTAACCTTTAGCAATAAACGAAAGTTTAACTAAGCTATACTAACCCCAAGGTTGGTCAATTTCTGTGCC  
AGCCACCGCGGTACACGATTAACCCAAGTCAATAGAAGC  
CGGCGTAAAGAGTGTTTTAGATCACCCCTCCCCAATAAAGCTAAAACCTCACCTGAGTTGTAAAAAACTCCAGTTGACAC  
AAAATAGACTACGAAAGTGGCTTTAACATATCTGAACACA  
CAATAGCTAAGACCCAACTGGGATTAGATACCCCACTATGCTTAGCCCTAAACCTCAACAGTTAAATCAACAAAACCTGC  
TCGCCAGAACACTACGAGCCACAGCTTAAAACCTCAAAGGA  
CCTGGCGGTGCTTCATATCCCTCTAGAGGAGCCTGTTCTGTAATCGATAAACCCCGATCAACCTCACCACTCTTGCTCA  
GCCTATATACGCCATCTTTCAGCAAACCTGATGAAGGCT  
ACAAAGTAAGCGCAAGTACCCACGTAAGACGTTAGGTCAAGGTGTAGCCCATGAGGTGGCAAGAAATGGGCTACATTTT  
CTACCCCAAGAACTACGATAGCCCTTATGAACTTAAAGG  
GTGCAAGGTGGATTTAGCAGTAACTGAGAGTAGAGTGCTTAGTTGAACAGGGCCCTGAAGCGCGTACACACCCGCCGCT  
ACCCTCCTCAAGTATACTTCAAAGGACATTTAACTAAAAC  
CCCTACGATTTATATAGAGGAGACAAGTCGTAACATGGTAAGTGTACTGGAAAGTGCCTTGGACGAACCAGAGTGTAG  
CTTAACACAAAGCACCCAACTTACACTTAGGAGATTTCAA  
CTTAACTTGACCGCTCTGAGCTAAACCTAGCCCCAAACCCACTCCACCTTACTACCAGACAACCTTAGCCAAACCATTTA  
CCCAGATAAAGTATAGGCGATAGAAATTGAAACCTGGCGC

AATAGATATAGTACCGCAAGGGAAAGATGAAAAATTATAACCAAGCATAATATAGCAAGGACTAACCCCTATACCTTCTG  
CATAATGAATTAAGTAACTAGAAATAACTTTGCAAGGAGAGCCA  
AAGCTAAGACCCCCGAAACCAGACGAGCTACCTAAGAACAGCTAAAAGAGCACACCCCGTCTATGTAGCAAAATAGTGGGA  
AGATTTATAGGTAGAGGGCGACAAACCTACCGAGCCTGGTG  
ATAGCTGGTTGTCCAAGATAGAATCTTAGTTCAACTTTAAATTTGCCACAGAACCCTCTAAATCCCCTTGTAATTTAA  
CTGTTAGTCCAAAGAGGAACAGCTCTTTGGACACTAGGAA  
AAAACCTTGTAGAGAGAGTAAAAAA-  
TTTAAACCCCATAGTAGGCCTAAAAGCAGCCACCAATTAAGAAAGCGTTCAAGCTCAACACCCACTACCTAAAAAA-  
TCCCAAACATATAACTG  
AACTCCTCACACCCCAATTGGACCAATCTATCACCCCTATAGAAGAATAATGTTAGTATAAGTAACATGAAAACATTCTCC  
TCCGCATAAGCCTGCGTCAGATTAATAACACTGAACTGACA  
ATTAACAGCCCAATATCTACAATCAACCAACAAGTCATTATTACCCTCACTGTCAACCCAACACAGGCATGCTCATAAGG  
AAAGGTTAAAAAAGTAAAAGGAACTCGGCAAATCTTACC  
CCGCCTGTTTACCAAAAAACATCACCTCTAGCATCACAGTATTAGAGGCACCGCCTGCCAGTGACACATGTTTAAACGGC  
CGCGGTACCCTAACCGTGCAAAGGTAGCATAATCACTTGT  
TCCTTAAATAGGGACCTGTATGAATGGCTCCACGAGGGTTCAGCTGTCTCTTACTTTTAAACCAGTGAAATTGACCTGCC  
GTGAAGAGGCGGGCATGACACAGCAAGACGAGAAGACCCT  
ATGGAGCTTTAATTTATTAATGCAAACAGTACCTAACAAACCCACAGGTCTAAACTACCAAACCTGCATTAATAATTTT  
GGTTGGGGCGACCTCGGAGCAGAACCAACCTCCGAGCAG  
TACATGCTAAGACTTCACCAGTCAAAGCGAAGTACTATACTCAATTGATCCAATAACTTGACCAACGGAACAAGTTACCC  
TAGGGATAACAGCGCAATCCTATTCTAGAGTCCATATCAA  
CAATAGGGTTTACGACCTCGATGTTGGATCAGGACATCCCGATGGTGCAGCCGCTATTAAGGTTTCGTTTGTTCACCGAT  
TAAAGTCTACGTGATCTGAGTTCAGACCCGGAGTAATCCA  
GGTCGGTTTCTATCTACTTCAAATTCCTCCCTGTACGAAAGGACAAGAGAAATAAGGCCTACTTCACAAAGCGCCTTCCC  
CCGTAAATGATATCATCTCAACTTAGTATTATACCCACAC  
CCACCCAAGAACAGGGTTTGTAAAGATGGCAGAGCCCGGTAATCGCATAAACTTAAACTTTACAGTCAGAGGTTCAAT  
TCCTCTTCTTAAACAACATACCCATGGCCAACCTCCTACTC  
CTCATTGTACCCATTCTAATCGCAATGGCATTCTAATGCTTACCGAACGAAAAATTCTAGGCTATATACAACACTACGCAA  
AGGCCCCAACGTTGTAGGCCCTACGGGCTACTACAACCC  
TTCGCTGACGCCATAAACTCTTACCAAAGAGCCCTAAAACCCGCCACATCTACCATCACCCCTCTACATCACCGCCCC  
GACCTTAGCTCTCACCATCGCTCTTCTACTATGAACCCCC  
CTCCCCATACCCAACCCCTGGTCAACCTCAACCTAGGCCTCCTATTTATTCTAGCCACCTCTAGCCTAGCCGTTTACTC  
AATCCTCTGATCAGGGTGAGCATCAAACCTCAAACCTACGCC  
CTGATCGGCGCACTGCGAGCAGTAGCCCAAACAATCTCATATGAAGTCACCCTAGCCATCATTCTACTATCAACATTACT  
AATAAGTGGCTCCTTTAACCTCTCCACCCTTATCACAACA  
CAAGAACACCTCTGATTACTCCTGCCATCATGACCCTTGCCATAATATGATTTATCTCCACACTAGCAGAGACCAACCG  
AACCCCTTCGACCTTGCCGAAGGGGAGTCCGAAGTAGTC  
TCAGGCTTCAACATCGAATACGCCGAGGCCCTTCGCCCTATTCTTCATAGCCGAATACACAAACATTATTATAATAAA  
CACCCCTCACCACTACAATCTTCTAGGAACAACATATGAC  
GCACTCTCCCCTGAACTCTACACAACATATTTTGTACCAAGACCCTACTTCTAACCTCCCTGTTCTTATGAATTGAAAC  
AGCATAACCCCGATTCCGCTACGACCAACTCATAACCTC  
CTATGAAAAAATTTCCTACCCTCACCCCTAGCATTACTTATATGATATGTCTCCATACCCATTACAATCTCCAGCATCCC  
CCCTCAAACCTAAGAAATATGTCTGATAAAAGAGTTACTT  
TGATAGAGTAAATAATAGGAGCTTAAACCCCTTATTTCTAGGACTATGAGAATCGAACCCTCCCTGAGAATCCAAAAT  
TCTCCGTGCCACCTATCACACCCCATCCTAAAGTAAGGTC  
AGCTAAATAAGCTATCGGGCCCATACCCCGAAAAATGTTGGTTATACCCTTCCCGTACTAATTAATCCCCTGGCCCAACCC  
GTCATCTACTCTACCATCTTTGCAGGCACACTCATCACAG  
CGCTAAGCTCGCACTGATTTTTTACCTGAGTAGGCCTAGAAATAAACATGCTAGCTTTTTATTCCAGTTCTAACCAAAAA  
ATAAACCCCTCGTTCCACAGAAGCTGCCATCAAGTATTTCC  
TCACGCAAGCAACCGCATCCATAATCCTTCTAATAGCTATCCTCTTCAACAATATACTCTCCGGACAATGAACCATAACC  
AATACTACCAATCAATACTCATCATTAATAATCATAATGG  
CTATAGCAATAAACTAGGAATAGCCCCCTTTCCTTCTGAGTCCCAGAGGTTGCCCAAGGCACCCCTCTGACATCCGGC  
CTGCTTCTTCTCATATGACAAAAACTAGCCCCCATCTCAA  
TCATATACCAAATCTCTCCCTCACTAAACGTAAGCCTTCTCCTCACTCTCTCAATCTTATCCATCATAGCAGGCAGTTGA  
GGTGGATTAACCAAACCCAGCTACGCAAAATCTTAGCAT  
ACTCCTCAATTACCCACATAGGATGAATAATAGCAGTTCTACCGTACAACCCTAACATAACCATTCTTAATTTAACTATT  
TATATTATCCTAACTACTACCGCATTCTACTACTCACT

TAAACTCCAGCACCACGACCCTACTACTATCTCGCACCTGAAACAAGCTAACATGACTAACACCCTTAATTCCATCCACC  
CTCCTCTCCCTAGGAGGCCTGCCCCGCTAACCGGCTTTT  
TGCCCAAATGGGCCATTATCGAAGAATTACAAAAACAATAGCCTCATCATCCCCACCATCATAGCCACCATCACCCCTC  
CTTAACCTCTACTTCTACCTACGCCTAATCTACTCCACCT  
CAATCACACTACTCCCATATCTAACAACGTAAAAATAAAATGACAGTTTGAACATACAAAACCCACCCATTCTCCCC  
ACACTCATCGCCCTTACCACGCTACTCCTACCTATCTCCC  
CTTTTATACTAATAATCTTATAGAAATTTAGGTTAAATACAGACCAAGAGCCTTCAAAGCCCTCAGTAAGTTGCAATACT  
TAATTTCTGTAAACAGCTAAGGACTGCAAACCCCACTCTG  
CATCAACTGAACGCAAATCAGCCACTTTAATTAAGCTAAGCCCTTACTAGACCAATGGGACTTAAACCCACAAACTTA  
GTAAACAGCTAAGCACCTAATCAACTGGCTTCAATCTAC  
TTCTCCCCTCGGGGAAAAAAGCGGGGAGAAGCCCCGGCAGGTTTGAAGCTGCTTCTTTCGAATTTGCAATTCATATGA  
AAATCACCTCGGAGCTGGTAAAAAGAGGCCTAACCCCTGT  
CTTTAGATTTACAGTCCAATGCTTCACTCAGCCATTTTACCTCACCCCT-  
ACTGATGTTTCGCCGACCCTTACTATTCTCTACAAACCACAAAGACATTGGAACACTATACTATTATTTC  
GGCGCATGAGCTGGAGTCTTAGGCACAGCTCTAAGCCTCCTTATTCGAGCCGAGCTGGGCCAGCCAGGCAACCTTCTAGG  
TAACGACCACATCTACAACGTTATCGTACAGCCCATGCA  
TTTGTAATAATCTTCTTCATAGTAATACCCATCATAATCGGAGGCTTTGGCAACTGACTAGTTCCCCTAATAATCGGTGC  
CCCCGATATGGCGTTTCCCCGCATAAAACAACATAAGCTTC  
TGACTCTTACCTCCCTCTCTCCTACTCCTGCTCGCATCTGCTATAGTGGAGGCCGGAGCAGGAACAGGTTGAACAGTCTA  
CCCTCCCTTAGCAGGGAACCTACTCCACCCTGGAGCCTCC  
GTAGACCTAACCATCTTCTCCTTACACCTAGCAGGTGTCTCCTCTATCTTAGGGGCCATCAATTTTCATCACAAATTAT  
CAATATAAAACCCCTGCCATAACCCAATACCAAACGCC  
CTCTTCGTCTGATCCGTCTAATCACAGCAGTCTACTTCTCCTATCTCTCCAGTCTTAGCTGCTGGCATCACTATACT  
ACTAACAGACCACAACCTCAACACCACCTTCTTCGACCC  
GCCGGAGGAGGAGACCCATTCTATACCAACACCTATTCTGATTTTTTCGGTACCCTGAAGTTTATATTCTTATCCTACC  
AGGCTTCGGAATAATCTCCCATATTGTAACCTACTACTCC  
GGAAAAAAGAACCATTTGGATACATAGGTATGGTCTGAGCTATGATATCAATTGGCTTCTTAGGGTTTTATCGTGTGAGC  
ACACCATATATTTACAGTAGGAATAGACGTAGACACACGA  
GCATATTTACCTCCGCTACCATAATCATCGCTATCCCCACCGCGTCAAAGTATTTAGCTGACTCGCCACACTCCACGG  
AAGCAATATGAAATGATCTGCTGCACTGCTCTGAGCCCTA  
GGATTCATCTTTCTTTTACCCTAGGTGGCCTGACTGGCATTGTATTAGCAAACCTCATCACTAGACATCGTACTACACGA  
CACGTACTACGTTGTAGCTCACTTCCACTATGTCCTATCA  
ATAGGAGCTGTATTTGCCATCATAGGAGGCTTCATTCCTGATTTCCCCTATTCTCAGGCTACACCCTAGACCAAACCTA  
CGCCAAAATCCATTTCACTATCATATTCATCGGCGTAAAT  
CTAACTTTCTTCCCACAACACTTTCTCGGCCTATCCGGAATGCCCCGACGTTACTCGGACTACCCCGATGCATACACCAC  
ATGAAACATCCTATCATCTGTAGGCTCATTCAATTTCTCTA  
ACAGCAGTAATATTAATAATTTTCATGATTTGAGAAGCCTTCGCTTCGAAGCGAAAAGTCTAATAGTAGAAGAACCCTC  
CATAAACCTGGAGTGACTATATGGATGCCCCCACCCTAC  
CACACATTCGAAGAACCCGTATACATAAAATCTAGACAAAAAAGGAAGGAATCGAACCCCCAAAGCTGGTTTTCAAGCCA  
ACCCCATGGCCTCCATGACTTTTTTCAAAAAGGTATTAGAA  
AAACCATTTTATAACTTTGTCAAAGTTAAATTATAGGCTAAATCCTATATATCTTAATGGCACATGCAGCGCAAGTAGGT  
CTACAAGACGCTACTTCCCCTATCATAGAAGAGCTTATCA  
CCTTTTCATGATCACGCCCTCATAATCATTTTCTTATCTGCTTCTTAGTCTGTATGCCCTTTTCTTAACACTCACAACA  
AAACTAACTAATACTAACATCTCAGACGCTCAGGAAATAG  
AAACCGTCTGAACTATCCTGCCCGCCATCATCCTAGTCTCATCGCCCTCCCATCCCTACGCATCCTTTACATAACAGAC  
GAGGTCAACGATCCCTCCCTTACCATCAAATCAATTGGCC  
ACCAATGGTACTGAACCTACGAGTACACCGACTACGGCGGACTAATCTTCAACTCCTACATACTTCCCCATTATTCTTA  
GAACCAGGCGACCTGCGACTCCTTGACGTTGACAATCGAG  
TAGTACTCCCGATTGAAACCCCATTCGTATAATAATTACATCACAAGACGCTTTCGCACTCATGAGCTGTCCCCACATTA  
GGCTTAAAAACAGATGCAATTTCCCGGACGCTTAAACCAA  
CCACTTTTACCCTACACGACCGGGGTATACTACGGTCAATGCTCTGAAATCTGTGGAGCAAACCACAGTTTTCATGCC  
ATCGTCTTAGAATTAATTTCCCCTAAAAATCTTTGAAATAG  
GGCCCGTATTTACCCTATAGCACCCCTCTACCCCTCTAGAGCCACTGTAAAGCTAACTTAGCATTAACCTTTTAAAGT  
TAAAGATTAAGAGAACCAACACCTCTTTACAGTGAAATGC  
CCCAACTAAATACTACCGTATGGCCACCATAATTACCCCTACTCCTTACACTATTCTCATACCCCACTAAAAATA  
TTAAACACAACTACCACCTACCTCCCTCACCAAAGCCCA

TAAAAATAAAAAATTATAACAAACCCTGAGAACCAAAATGAACGAAAATCTGTTCGCTTCATTTCATTGCCCCACAATCC  
TAGGCCTACCCGCCGAGTACTGATCATTCTATTTCCCC  
TCTATTGATCCCCACCTCCAAATATCTCATCAACAACCGACTAATCACCACCCAACAATGACTAATCAAACCTAACCTCAA  
AACAAATGATAACCATACACAACACTAAAGGACGAACCTG  
ATCTCTTATACTAGTATCCTTAATCATTTTTATTGCCACAACCTAACCTCCTCGGACTCCTGCCTTACTCATTTACACCAA  
CCACCCAACCTATCTATAAACCTAGCCATGGCCATCCCCCTT  
ATGAGCGGGCGCAGTGATTATAGGCTTTTCGCTCTAAGATTAAAAATGCCCTAGCCCACTTCTTACCACAAGGCACACCTA  
CACCCCTTATCCCCATACTAGTTATTATCGAAACCATCAG  
CCTACTCATTCAACCAATAGCCCTGGCCGTACGCCTAACCGCTAACATTACTGCAGGCCACCTACTCATGCACCTAATTG  
GAAGCGCCACCCTAGCAATATCAACCATTAACCTTCCCTC  
TACACTTATCATCTTCACAATTCTAATTCTACTGACTATCCTAGAAATCGCTGTGCCTTAATCCAAGCCTACGTTTTCA  
CACTTCTAGTAAGCCTCTACCTGCACGACAACACATAATG  
ACCCACCAATCACATGCCTATCATATAGTAAAACCCAGCCCATGACCCCTAACAGGGGCCCTCTCAGCCCTCCTAATGAC  
CTCCGGCCTAGCCATGTGATTTCACTTCCACTCCATAACG  
CTCCTCATACTAGGCCTACTAACCAACACACTAACCATATACCAATGATGGCGCGATGTAACACGAGAAAGCACATACCA  
AGGCCACCACACACCACCTGTCCAAAAGGCCTTCGATAC  
GGGATAATCCTATTTATTACCTCAGAAGTTTTTTTTCTTCGCAGGATTTTTCTGAGCCTTTTACCCTCCAGCCTAGCCCC  
TACCCCAATTAGGAGGGCACTGGCCCCAACAGGCATC  
ACCCCGCTAAATCCCCTAGAAGTCCCCTCCTAAACACATCCGTATTACTCGCATCAGGAGTATCAATCACCTGAGCTCA  
CCATAGTCTAATAGAAAACAACCGAAACCAATAATTCAA  
GCACTGCTTATTACAATTTTACTGGGTCTCTATTTTACCCTCCTACAAGCCTCAGAGTACTTCGAGTCTCCCTTACCAT  
TTCCGACGGCATCTACGGCTCAACATTTTTTGTAGCCACA  
GGCTTCCACGGACTTCACGTCAATTATTGGCTCACTTTTCTCCTACTATCTGCTTCATCCGCCAACTAATATTTCACTTTAC  
ATCCAAACATCACTTTGGCTTCGAAGCCGCCGCCTGATAC  
TGGCATTGTTGTAGATGTGGTTTACTATTTCTGTATGTCTCCATCTATTGATGAGGGTCTTACTCTTTTAGTATAAATAG  
TACCGTTAACTTCCAATTAAGTATTTTGGACAACATTCAA  
AAAAGAGTAATAAACTTCGCCTTAATTTTAATAATCAACACCCTCCTAGCCTTACTACTAATAATTATTACATTTTACT  
ACCACAACCTCAACGGCTATATAGAAAATCCACCCCTTAC  
GAGTGGCGGCTTCGACCCTATATCCCCCGCCGCTCCCTTTCTCCATAAAATTTCTTCTTAGTAGCTATTACCTTCTTATT  
ATTTGATCTAGAAATTTGCCCTCCTTTTACCCTACCATGA  
GCCCTACAAAACAACCTAACCTGCCACTAATAGTTATGTATCCCTCTTATTAATCATCATCCTAGCCCTAAGTCTGGCCTA  
TGAGTGACTACAAAAGGATTAGACTGAACCGAATTGGTA  
TATAGTTTAAACAAAACGAATGATTTTCGACTCATTAAATTATGATAATCATATTTACCAAATGCCCTCATTACATAAA  
TATTATACTAGCATTTACCATCTCACTTCTAGGAATACTA  
GTATATCGCTCACACCTCATATCCTCCCTACTATGCCTAGAAGGAATAATACTATCGCTGTTTCATTATAGCTACTCTCAC  
AACCTCAACACCCACTCCCTCTTAGCCAATATTGTGCCT  
ATTGCCATACTAGTCTTTGCCGCCTGCGAAGCAGCGGTGGGCTAGCCCTACTAGTCTCAATCTCCAACACATATGGCCT  
AGACTACGTACATAACCTAAACCTACTCCAATGCTAAAAC  
TAATCGTCCCAACAATTATATTACTACCACTGACATGACTTTCCAAAAACACATAATTTGAATCAACACAACCACCCAC  
AGCCTAATTATTAGCATCATCCCTCTACTATTTTTTAACC  
AAATCAACAACAACCTATTTAGCTGTTCCCAACCTTTTCTCCGACCCCTAACAAACCCCTCCTAATACTAACTACC  
TGACTCCTACCCCTCACAATCATGGCAAGCCAACGCCACT  
TATCCAGTGAACCACTATCACGAAAAAACTCTACCTCTCTATACTAATCTCCCTACAAATCTCCTTAATTATAACATTC  
ACAGCCACAGAATAATCATATTTTATATCTTCTTCGAAA  
CCACACTTATCCCCACCTTGGCTATCATACCCGATGAGGCAACCAGCCAGAACGCCTGAACGCAGGCACATACTTCTTA  
TTCTACACCCTAGTAGGCTCCCTTCCCCTACTCATCGCAC  
TAATTTACACTCACAACACCCTAGGCTCACTAAACATTCTACTACTCACTCTCACTGCCAAGAATACTCAAACCTCCTGA  
GCCAACAACCTAATATGACTAGCTTACACAATAGCCTTTA  
TAGTAAAGATACCTCTTTACGGACTCCACTTATGACTCCCTAAAGCCCATGTGGAAGCCCCATCGCTGGGTCAATAGTA  
CTTGCCGCGAGTACTCTTAAAACCTAGGCGGCTATGGTATAA  
TACGCCTCACACTCATTCTCAACCCCTGACAAAACACATAGCCTACCCCTTCTTGTACTATCCCTATGAGGCATAATT  
ATAACAAGCTCCATCTGCCTACGACAAAACAGACCTAAAAT  
CGCTCATTGCATACTCTTCAATCAGCCACATAGCCCTCGTAGTAACAGCCATTCTCATCCAAACCCCTGAAGCTTACC  
GGCGCAGTCACTTCTATAATCGCCCACGGACTTACATCCT  
CATTACTATTCTGCCTAGCAAACCTCAAACCTACGAACGCCTCACAGTCGCATCATAATCCTCTCTCAAGGACTTCAAACCT  
CTACTCCCACTAATAGCTTTTTGATGACTTCTAGCAAGCC

TCGCTAACCTCGCCTTACCCCCACTATTAACCTACTGGGAGAACTCTCTGTGCTAGTAACCACGTTCTCCTGATCAAAT  
ATCACTCTCCTACTTACAGGACTCAACATACTAGTCACAG  
CCCTATACTCCCTCTACATATTTACCACAACACAATGAGGCTCACTCACCCACCACATTAACAACATAAAACCCTCATT  
ACACGAGAAAACACCCTCATGTTCATACACCTATCCCCCA  
TTCTCCTCCTATCCCTCAACCCCGACATCATTACCGGGTTTTCTCTTGTAATATAGTTTTAACAAAACATCAGATTGT  
GAATCTGACAACAGAGGCTTACGACCCCTTATTTACCGAG  
AAAGCTCACAAGAAGTGTAACTCATGCCCCATGTCTAAACAACATGGCTTTCTCAACTTTTAAAGGATAACAGCTATCC  
ATTGGTCTTAGGCCCAAAAATTTTGGTGCAACTCCAAAT  
AAAAGTAATAACCATGCACACTACTATAACCACCCTAACCCCTGACTTCCCTAATTCCCCCATCCTTACCACCCTCGTTA  
ACCCTAACAAAAAACTCATACCCCAATTATGTAAAATC  
CATTGTGCGATCCACCTTTATTATCAGTCTCTTCCCCACAACAATATTATCATGTGCCTAGACCAAGAAGTTATTATCTCGA  
ACTGACACTGAGCCACAACCCAAACAACCCAGCTCTCCCT  
AAGCTTCAAAGTACTACTTCTCCATAATATTATCCCTGTAGCATTGTTGTTACATGGTCCATCATAGAATTCTCAC  
TGTGATATATAAACTCAGACCCAAACATTAATCAGTTCTT  
CAAATATCTACTCATTTCCTAATTACCATACTAATCTTAGTTACCGCTAACAACTATTCCAAGTTCATCGGCTGAG  
AGGGCGTAGGAATTATATCCTTCTTGCTCATCAGTTGATG  
ATACGCCCCGAGCAGATGCCAACACAGCAGCCATTCAAGCAATCCTATAACAACCGTATCGGCGATATCGGTTTCATCCTCG  
CCTTAGCATGATTTATCCTACACTCCAACCTCATGAGACCC  
ACAACAAATAGCCCTTCTAAACGCTAATCCAAGCCTCACCCCACTACTAGGCCTCCTCCTAGCAGCAGCAGGCAAATCAG  
CCCAATTAGGTCTCCACCCCTGACTCCCCTCAGCCATAGA  
AGGCCCCACCCAGTCTCAGCCCTACTCCACTCAAGCACTATAGTTGTAGCAGGAATCTTCTTACTCATCCGCTTCCACC  
CCCTAGCAGAAAATAGCCCACTAATCCAACTCTAACACT  
ATGCTTAGGCGCTATCACCCTCTGTTTCGAGCAGTCTGCGCCCTTACACAAAATGACATCAAAAAAATCGTAGCCTTCT  
CCACTTCAAGTCAACTAGGACTCATAATAGTTACAATCGG  
CATCAACCAACCACACCTAGCATTCTGCACATCTGTACCCACGCCTTCTTCAAAGCCATACTATTTATGTGCTCCGGGT  
CCATCATCCACAACCTTAAACAATGAACAAGATATTCGAAA  
AATAGGAGGACTACTCAAACCATACCTCTCACTTCAACCTCCCTCACCATTGGCAGCCTAGCATTAGCAGGAATACCTT  
TCCTCACAGTTTTCTACTCCAAAGACCACATCATCGAAA  
CGCAAACATATCATACAAAACGCCTGAGCCCTATCTATTACTCTCATCGCTACCTCCCTGACAAGCGCCTATAGCACTC  
GAATAATTTCTTCTCACCTAACAGGTCAACCTCGTTCCC  
CACCCTTACTAACATTAACGAAAATAACCCCACTACTAAACCCCATTAACGCCTGGCAGCCGGAAGCCTATTTCGAG  
GATTTCTCATTACTAACAACTTTCCCCCGCATCCCCCTT  
CCAAACAACAATCCCCCTTACTTAAACTCACAGCCCTCGCTGTCACTTTCTTAGGACTTCTAACAGCCCTAGACCTCA  
ACTACCTAACCAACAACTTAAAATAAAATCCCCACTATG  
CACATTTTATTTCTCCAACATACTCGGATTCTACCCTAGCATCACACACCCGACAATCCCCTATCTAGGCCTTCTTACGA  
GCCAAAACCTGCCCCCTACTCCTCCTAGACCTAACCTGACT  
AGAAAAGCTATTACCTAAAACAATTTACAGCACCAAATCTCCACCTCCATCATCACCTCAACCCAAAAAGGCATAATTA  
AACTTTACTTCTCTCTTTCTTCTTCCCACTCATCCTAAC  
CCTACTCCTAATCACATAACCTATTTCCCCGAGCAATCTCAATTACAATATATACACCAACAAACAATGTTCAACCAGTA  
ACTACTACTAATCAACGCCATAATCATACAAAGCCCCCG  
CACCAATAGGATCCTCCCGAATCAACCCTGACCCCTCTCCTTATAAATTATTAGCTTCTTACACTATTAAGTTTACC  
ACAACCACCACCCCATCACTCTTTACCCACAGCACCA  
ATCCTACCTCCATCGCTAACCCCACTAAAACACTCACCAAGACCTCAACCCCTGACCCCATGCCTCAGGATACTCCTCA  
ATAGCCATCGCTGTAGTATATCCAAAGACAACCATCATTC  
CCCCTAAATAAATTAATAAACTATTAACCCATATAACCTCCCCAAAATTCAGAATAATAACACACCCGACCACACCG  
CTAACAAATCAATACTAAACCCCATAAATAGGAGAAGGCT  
TAGAAGAAAACCCCAAAACCCCTTACTAAACCCCACTCAACAGAAAACAAGCATAACATCATTATTCTCGCACGGACT  
ACAACCACGACCAATGATATGAAAAACCATCGTTGTATTT  
CAACTACAAGAACACCAATGACCCCAATACGCAAAATTAACCCCTAATAAAATTAATTAACCACTCATTATCATCGACCTC  
CCCACCCCATCCAACATCTCCGCATGATGAACTTTCGGCT  
CACTCCTTGGCGCCTGCCTGATCCTCCAAATCACACAGGACTATTCTAGCCATGCACTACTCACAGACGCCTCAACC  
GCCTTTTTCATCAATCGCCACATCACTCGAGACGTAAATT  
ATGGCTGAATCATCCGCTACCTTACGCAATGGCGCCTCAATATTCTTTATCTGCCTCTTCTACACATCGGGCGAGGC  
CTATATTACGGATCATTTCTTACTCAGAAACCTGAAACA  
TCGGCATTATCCTCCTGCTTGCAACTATAGCAACAGCCTTCATAGGCTATGTCCTCCCGTGAGGCCAAATATCATTCTGA  
GGGGCCACAGTAATTACAACTTACTATCCGCCATCCCAT

ACATTGGGACAGACCTAGTTCAATGAATCTGAGGAGGCTACTCAGTAGACAGTCCCACCCTCACACGATTCTTTACCTTT  
CACTTCATCTTGCCTTTCATTATTGCAGCCCTAGCAGCAC  
TCCACCTCCTATTCTTGCACGAAACGGGATCAAACAACCCCTAGGAATCACCTCCCATTCCGATAAAATCACCTTCCAC  
CCTTACTACACAATCAAAGACGCCCTCGGCTTACTTCTCT  
TCCTTCTCTCCTTAATGACATTAACACTATTCTCACCAGACCTCCTAGGCGACCCAGACAATTATACCCTAGCCAACCC  
TTAAACACCCCTCCCCACATCAAGCCCGAATGATATTTCC  
TATTGCGCTACACAATTCTCCGATCCGTCCCTAACAACTAGGAGGCGTCTTGGCCCTATTACTATCCATCCTCATCCTA  
GCAATAATCCCCATCCTCCATATATCCAAACAACAAAGCA  
TAATATTTGCGCCACTAAGCCAATCACTTTATTGACTCCTAACCGCAGACCTCCTCATTCTAACCTGAATCGGAGGACAA  
CCAGTAAGCTACCCTTTTACCATCATTGGACAAGTAGCAT  
CCGTACTATACTTACAACAATCCTAATCCTAATACCAACTATCTCCCTAATTGAAAACAAAATACTCAAATGGGCCTGT  
CCTTGTAGTATAAACTAATACACCAGTCTTGTAAACCGGA  
GATGAAAACCTTTTTCCAAGGACAAATCAGAGAAAAAGTCTTTAACTCCACCATTAGCACCCAAAGCTAAGATTCTAATT  
TAAACTATT

#ASIA Evenki

CCACAGTTTTATGTAGCTTACCTCCTCAAAGCAATACACTGAAAATGTTTTAGACGGGCTCACATCACCCCATAAACAAATA  
GGTTTTGGTCTTAGCCTTTCTATTAGCTCTTAGTAAGATTA  
CACATGCAAGCATCCCCGTTCCAGTGAGTTACCCTCTAAATCACCACGATCAAAGGGACAAGCATCAAGCACGCAGCA  
ATGCAGCTCAAACGCTTAGCCTAGCCACACCCCCACGGG  
AAACAGCAGTGATTAACCTTTAGCAATAAACGAAAGTTTAACTAAGCTATACTAACCCAGGGTTGGTCAATTTCTGTGCC  
AGCCACCGCGGTACACGATTAACCCAAGTCAATAGAAGC  
CGGCGTAAAGAGTGTTTTAGATCACCCCTCCCCAATAAAGCTAAAACCTCACCTGAGTTGTAAAAAACTCCAGTTGACAC  
AAAATAGACTACGAAAGTGGCTTTAACATATCTGAACACA  
CAATAGCTAAGACCCAACTGGGATTAGATACCCCACTATGCTTAGCCCTAAACCTCAACAGTTAAATCAACAAAACCTGC  
TCGCCAGAACACTACGAGCCACAGCTTAAAACCTCAAAGGA  
CCTGGCGGTGCTTCATATCCCTCTAGAGGAGCCTGTTCTGTAATCGATAAACCCCGATCAACCTCACCCCTCTTGCTCA  
GCCTATATACCGCCATCTTCAGCAAACCCTGATGAAGCT  
ACAAAGTAAGCGCAAGTACCCACGTAAAGACGTTAGGTCAAGGTGTAGCCCATGAGGTGGCAAGAAATGGGCTACATTTT  
CTACCCAGAAAACCTACGATAGCCCTTATGAAAACCTAAGG  
GTCGAAGGTGGATTTAGCAGTAACTGAGAGTAGAGTGCTTAGTTGAACAGGGCCCTGAAGCGGTACACACCGCCCGTC  
ACCCTCCTCAAGTATACTTCAAAGGACATTTAACTAAAAC  
CCCTACGCATTTATATAGAGGAGACAAGTCGTAACATGGTAAGTGTACTGGAAAGTGCACCTGGACGAACCAGAGTGTAG  
CTTAACACAAAGCACCCAACCTTACACTTAGGAGATTTCAA  
CTTAACTTGACCGCTCTGAGCTAAACCTAGCCCCAAACCCACTCCACCTTACTACCAGACAACCTTAGCCAAACCATTTA  
CCCAAATAAAGTATAGGCGATAGAAATTGAAACCTGGCGC  
AATAGATATAGTACCGCAAGGGAAAGATGAAAAATTATAACCAAGCATAATATAGCAAGGACTAACCCCTATACCTTCTG  
CATAATGAATTAAGTAACTAGAAATAACTTTGCAAGGAGAGCCA  
AAGCTAAGACCCCCGAAACCAGACGAGCTACCTAAGAACAGCTAAAAGAGCACACCCGTCTATGTAGCAAATAGTGGGA  
AGATTTATAGGTAGAGGCGACAAACCTACCGAGCCTGGTG  
ATAGCTGGTTGTCCAAGATAGAATCTTAGTTCAACTTTAAATTTGCCACAGAACCCTCTAAATCCCCTTGTAATTTAA  
CTGTTAGTCCAAGAGGAACAGCTCTTTGGACACTAGGAA  
AAAACCTTGTAGAGAGAGTAAAAAA-  
TTTAACCCCATAGTAGGCCTAAAAGCAGCCACCAATTAAGAAAGCGTTCAAGCTCAACACCCACTACCTAAAAAAATCC  
CAAACATATAACTG  
AACTCCTCACACCCAATTGGACCAATCTATCACCTATAGAAGAATAATGTTAGTATAAGTAACATGAAAACATTCTCC  
TCCGCATAAGCCTGCGTCAGATTAACCACTGAACTGACA  
ATTAACAGCCCCAATATCTACAATCAACCAACAAGTCATTATTACCCTCACTGTCAACCCAACACAGGCATGCTCATAAGG  
AAAGGTTAAAAAAGTAAAAGGAACTCGGCAAATCTTACC  
CCGCCTGTTTACCAAAAACATCACCTCTAGCATCACAGTATTAGAGGCACCGCCTGCCAGTGACACATGTTTAAACGGC  
CGCGGTACCCTAACCGTGCAAAGGTAGCATAATCACTTGT  
TCCTTAAATAGGGACCTGTATGAATGGCTCCACGAGGGTTTCAAGCTGTCTCTTACTTTTTAACAGTGAAATTGACCTGCC  
GTGAAGAGGCGGGCATGACACAGCAAGACGAGAAGACCCT  
ATGGAGCTTTAATTTATTAATGCAAACAGTACCTAACAAACCCACAGGTCTAACTACCAAACCTGCATTAATAATTTT  
GGTTGGGGCGACCTCGGAGCAGAACCCAACCTCCGAGCAG  
TACATGCTAAGACTTACCAGTCAAAGCGAACTACTATACTCAATTGATCCAATAACTTGACCAACGGAACAAGTTACCC  
TAGGGATAACAGCGCAATCCTATTCTAGAGTCCATATCAA

CAATAGGGTTTTACGACCTCGATGTTGGATCAGGACATCCCGATGGTGCAGCCGCTATTTAAAGGTTGTTTTGTTCAACGAT  
TAAAGTCCTACGTGATCTGAGTTCAGACCCGGAGTAATCCA  
GGTCGGTTTTCTATCTACTTCAAATTCCTCCCTGTACGAAAGGACAAGAGAAATAAGGCCTACTTCACAAAGCGCCTTCCC  
CCGTAAATGATATCATCTCAACTTAGTATTATACCCACAC  
CCACCCAAGAACAGGGTTTTGTTAAGATGGCAGAGCCCCGGTAATCGCATAAACTTAAACTTTACAGTCAGAGGTTCAAT  
TCCTCTTCTTAAACAACATACCCATGGCCAACCTCCTACTC  
CTCATTGTACCCATTCTAATCGCAATGGCATTTCCTAATGCTTACCGAACGAAAAATTCTAGGCTATATACAACCTACGCAA  
AGGCCCAACGTTGTAGGCCCTACGGGCTACTACAACCC  
TTCGCTGACGCCATAAACTCTTCACCAAAGAGCCCCATAAAACCCGCCACATCTACCATCACCTCTACATCACCGCCCC  
GACCTTAGCTCTCACCATCGCACTTCTACTATGAACCCCC  
CTCCCCATAACCAACCCCTGGTCAACCTCAACCTAGGCCCTCTATTTATTCTAGCCACCTCTAGCCTAGCCGTTTACTC  
AATCCTCTGATCAGGGTGAGCATCAAACCTCAAACCTACGCC  
CTGATCGGCGCACTGCGAGCAGTAGCCCAAACAATCTCATATGAAGTCACCCTAGCCATCATTCTACTATCAACATTACT  
AATAAGTGGCTCCTTTAACCTCTCCACCCTTATCACAACA  
CAAGAACACCTCTGATTACTCCTGCCATCATGACCCTTGGCCATAATATGATTTATCTCCACACTAGCAGAGACCAACCG  
AACCCCTTCGACCTTGCCGAAGGGGAGTCCGAACCTAGTC  
TCAGGCTTCAACATCGAATACGCCGAGGCCCTTCGCCCTATTCTTCATAGCCGAATACACAAACATTATTATAATAAA  
CACCTCACCACTACAATCTTCTAGGAACAACATATGAC  
GCACTCTCCCCTGAACTCTACACAACATATTTTGTACCAAGACCCTACTTCTAACCTCCCTGTTCTTATGAATTGAAAC  
AGCATAACCCCGATTCCGCTACGACCAACTCATAACCTC  
CTATGAAAAAATTCCTACCCTCACCTAGCATTACTTATATGATATGTCTCCATACCCATTACAATCTCCAGCATTCC  
CCCTCAAACCTAAGAAATATGTCTGATAAAAGAGTTACTT  
TGATAGAGTAAATAATAGGAGCTTAAACCCCTTATTTCTAGGACTATGAGAATCGAACCCTATCCCTGAGAATCCAAAAT  
TCTCCGTGCCACCTATCACACCCCATCCTAAAGTAAGGTC  
AGCTAAATAAGCTATCGGGCCCATACCCCGAAAATGTTGGTTATACCCTTCCCGTACTAATTAATCCCTGGCCCAACCC  
GTCATCTACTCTACCATCTTTGCAGGCACACTCATCACAG  
CGCTAAGCTCGCACTGATTTTTTACCTGAGTAGGCCTAGAAATAAACATGCTAGCTTTTTATTCCAGTTCTAACCAAAAA  
ATAAACCTCGTTCCACAGAAGCTGCCATCAAGTATTTCC  
TCACGCAAGCAACCGCATCCATAATCCTTCTAATAGCTATCCTCTTCAACAATATACTCTCCGGGCAATGAACCATAACC  
AATACTACCAATCAATACTCATCATTATAATAATCATAATGG  
CTATAGCAATAAACTAGGAATAGCCCCCTTTCACCTCTGAGTCCCAGAGGTTACCCAAGGCACCCCTCTGACATCCGGC  
CTGCTTCTTCTCACATGACAAAACTAGCCCCCATCTCAA  
TCATATACCAAATCTCTCCCTCACTAAACGTAAGCCTTCTCCTCACTCTCTCAATCTTATCCATCATAGCAGGCAGTTGA  
GGTGGATTAAACCAAACCCAGCTACGCAAAATCTTAGCAT  
ACTCCTCAATTACCCACATAGGATGAATAATAGCAGTTCTACCGTACAACCCTAACATAACCATTCTTAATTTAACTATT  
TATATTATCCTAACTACTACCGCATTCTACTACTCAACT  
TAAACTCCAGCACCACGACCCTACTACTATCTCGCACCTGAAACAAGCTAACATGACTAACACCCTTAATTCCATCCACC  
CTCCTCTCCCTAGGAGGCCTGCCCCGCTAACCGGCTTTT  
TGCCCAAATGGGCCATTATCGAAGAATTCACAAAAACAATAGCCTCATCATCCCCACCATCATAGCCACCATCACCTC  
CTTAACCTCTACTTCTACCTACGCCTAATCTACTCCACCT  
CAATCACACTACTCCCATATCTAACAACGTAATAAATAAATGACAGTTTGAACATACAAAACCCACCCATTCTCCCC  
ACACTCATCGCCCTTACCACGCTACTCCTACCTATCTCCC  
CTTTTATACTAATAATCTTATAGAAATTTAGGTTAAATACAGACCAAGAGCCTTCAAAGCCCTCAGTAAGTTGCAATACT  
TAATTTCTGTAACAGCTAAGGACTGCAAAACCCACTCTG  
CATCAACTGAACGCAATCAGCCACTTTAATTAAGCTAAGCCCTTACTAGACCAATGGGACTTAAACCCACAAACACTTA  
GTTAACAGCTAAGCACCTAATCAACTGGCTTCAATCTAC  
TTCTCCCGCCCGGGAAAAAAGGCGGGAGAAGCCCCGGCAGGTTTGAAGCTGCTTCTTTCGAATTTGCAATTCATATGA  
AAATCACCTCGGAGCTGGTAAAAAGAGGCCTAACCCCTGT  
CTTTAGATTTACAGTCCAATGCTTCACTCAGCCATTTTACCTCACCCCC-  
ACTGATGTTGCGCCAGCGTTGACTATTCTCTACAAACCACAAAGACATTGGAACACTATACCTATTATTC  
GGCGCATGAGCTGGAGTCTTAGGCACAGCTCTAAGCCTCCTTATTCGAGCCGAGCTAGGCCAGCCAGGCAACCTTCTAGG  
TAACGACCACATCTACAACGTTATCGTACAGCCCATGCA  
TTTGTAATAATCTTCTTCATAGTAATACCCATCATAATCGGAGGCTTTGGCAACTGACTAGTTCCCTAATAATCGGTGC  
CCCCGATATGGCGTTTTCCCGCATAAACAACATAAGCTTC  
TGACTCTTACCTCCCTCTCTCCTACTCCTGCTCGCATCTGCTATAGTGGAGGCCGGAGCAGGAACAGGTTGAACAGTCTA  
CCCTCCCTTAGCAGGGAACCTACTCCACCCTGGAGCCTCC

GTAGACCTAACCATCTTCTCCTTACACCTAGCAGGTGTCTCCTCTATCTTAGGGGCCATCAATTTTCATCACAACAATTAT  
CAATATAAAACCCCTGCCATAACCCAATACCAAACGCC  
CTCTTCGTCTGATCCGTCTAATCACAGCAGTCTACTTCTCCTATCTCTCCAGTCTTAGCTGCTGGCATCACTATACT  
ACTAACAGACCGCAACCTCAACACCACCTTCTTCGACCCC  
GCCGGAGGAGGAGACCCATTCTATACCAACACCTATTCTGATTTTTTCGGTACCCTGAAGTTTATATTCTTATCCTACC  
AGGCTTCGGAATAATCTCCCATATTGTAACCTTACTACTCC  
GGAAAAAAGAACCATTTGGATACATAGGTATGGTCTGAGCTATGATATCAATTGGCTTCTTAGGGTTTATCGTGTGAGC  
ACACCATATATTTACAGTAGGAATAGACGTAGACACACGA  
GCATATTTACCTCCGCTACCATAATCATCGCTATCCCCACCGGCGTCAAAGTATTTAGCTGACTCGCCACACTCCACGG  
AAGCAATATGAAATGATCTGCTGCAGTGTCTGAGCCCTA  
GGATTCATCTTTCTTTTACCCTAGGTGGCCTGACTGGCATTGTATTAGCAAACCTCATCACTAGACATCGTACTACACGA  
CACGTACTACGTTGTAGCTCACTTCCACTATGTCCTATCA  
ATAGGAGCTGATTTTCCATCATAGGAGGCTTCATTCACTGATTTCCCTATTCTCAGGCTACACCCTAGACCAAACCTA  
CGCCAAAATCCATTTCACTATCATATTCATCGGCGTAAAT  
CTAACTTTCTTCCACAACACTTTCTAGGCCTATCCGGAATGCCCGACGTTACTCGGACTACCCCGATGCATACACCAC  
ATGAAACATCCTATCATCTGTAGGCTCATTCAATTTCTCTA  
ACAGCAGTAATATTAATAATTTTCATGATTTGAGAAGCCTTCGCTTCGAAGCGAAAAGTCTAATAGTAGAAGAACCCTC  
CATAAACCTGGAGTGACTATATGGATGCCCCCACCCTAC  
CACACATTCGAAGAACCCGTATACATAAAAATCTAGACAAAAAAGGAAGGAATCGAACCCCCCAAAGCTGGTTTTCAAGCCA  
ACCCCATGGCCTCCATGACTTTTTCAAAAAGGTATTAGAA  
AAACCATTTATAACTTTGTCAAAGTTAAATTATAGGCTAAATCCTATATATCTTAATGGCACATGCAGCGCAAGTAGGT  
CTACAAGACGCTACTTCCCCTATCATAGAAGAGCTTATCA  
CCTTTTCATGATCACGCCCTCATAATCATTTTCTTATCTGCTTCTTAGTCTGTATGCCCTTTTCTAACACTCACAACA  
AAACTAACTAATACTAACATCTCAGACGCTCAGGAAATAG  
AAACCGTCTGAACTATCCTGCCCGCCATCATCCTAGTCTCATCGCCCTCCCATCCCTACGCATCCTTTACATAACAGAC  
GAGGTCAACGATCCCTCCCTTACCATCAAATCAATTGGCC  
ACCAATGGTACTGAACCTACGAGTACACCGACTACGGCGGACTAATCTTCAACTCCTACATACTTCCCCATTATTCTTA  
GAACCAGGCGACCTGCGACTCCTTGACGTTGACAATCGAG  
TAGTGTCTCCCGATTGAACCCCCCATTCTGTATAATAATTACATCACAAGACGCTTTCGACTCATGAGCTGTCCCCACATTA  
GGCTTAAAAACAGATGCAATTTCCCGGACGCTCAAACCAA  
CCACTTTACCGCTACACGACCGGGGTATACTACGGTCAATGCTCTGAAATCTGTGGAGCAAACCACAGTTTTCATGCC  
ATCGTCTAGAATTAATTTCCCTAAAAATCTTTGAAATAG  
GGCCCGTATTTACCCTATAGCACCCCTCTACCCCTCTAGAGCCACTGTAAAGCTAACTTAGCATTAACCTTTTAAAGT  
TAAAGATTAAGAGAACCAACACCTCTTTACAGTGAAATGC  
CCCACTAAATACTACCGTATGGCCACCATAATTACCCCATACTCCTTACACTATTCTCATACCCCACTAAAAATA  
TTAAACACAAACTACCACCTACCTCCCTCACCAAAACCCA  
TAAAAATAAAAAATTATAACAAACCCTGAGAACCAAAATGAACGAAAATCTGTTTCGCTTCATTATTGCCCCACAATCC  
TAGGCCTACCCGCCACAGTACTGATCATTCTATTTCCCC  
TCTATTGATCCCCACCTCCAAATATCTCATCAACAACCGACTAATCACCACCAACAATGACTAATCAAACCTAACCTCAA  
AACAAATGATAGCCATACACAACACTAAAGGACGAACCTG  
ATCTCTTATACTAGTATCCTTAATCATTTTTATTGGCACAACCTAACCTCCTCGGACTCCTGCCCCACTCATTTACACCAA  
CCACCCAACTATCTATAAACCTAGCCATGGCCATCCCCTT  
ATGAGCGGGCGCAGTGATTATAGGCTTTTCGCTCTAAGATTAATAATGCCCTAGCCACTTCTTACCACAAGGCACACCTA  
CACCCCTTATCCCCATACTAGTTATTATCGAAACCATCAG  
CCTACTCATTCAACCAATAGCCCTGGCCGTACGCCTAACCGCTAACATTACTGCAGGCCACCTACTCATGCACCTAATTG  
GAAGCGCCACCCTAGCAATATCAACCATTAACCTTCCCTC  
TACACTTATCATCTTACAATTCTAATTCTACTGACTATCCTAGAAATCGTGTGCGCTTAATCCAAGCCTACGTTTTCA  
CACTTCTAGTAAGCCTCTACCTGCACGACAACACATAATG  
ACCCACCAATCACATGCCTATCATATAGTAAAACCCAGCCCATGACCCCTAACGGGGGCCCTCTCAGCCCTCCTAATGAC  
CTCCGGCCTAGCCATGTGATTTCACTTCCACTCCATAACG  
CTCCTCATACTAGGCCTACTAACCAACACACTAACCATATACCAATGATGGCGCGATGTAACACGAGAAAGCACATACCA  
AGGCCACCACACACCACCTGTCCAAAAGGCCTTCGATAC  
GGGATAATCCTATTTATTACCTCAGAAGTTTTTTTTCTTCGAGGATTTTTCTGAGCCTTTTACCCTCCAGCCTAGCCCC  
TACCCCAACTAGGGGGGCACTGGCCCCAACAGGCATC  
ACCCCGCTAAATCCCCTAGAAGTCCCCTCCTAAACACATCCGTATTACTCGCATCAGGAGTATCAATCACCTGAGCTCA  
CCATAGTCTAATAGAAAACAACCGAAACCAATAATTCAA

GCCTGCTTATTACAATTTTACTGGGTCTCTATTTTACCCTCCTACAAGCCTCAGAGTACTTCGAGTCTCCCTTCACCAT  
TTCCGACGGCATCTACGGCTCAACATTTTTTGTAGCCACA  
GGCTTCCACGGACTTCACGTCATTATTGGCTCAACTTTTCTCACTATCTGCTTCATCCGCCAACTAATATTTCACTTTAC  
ATCCAAACATCACTTTGGCTTCGAAGCCGCCGCTGATAC  
TGGCATTGTTGTAGATGTGGTTTACTATTTCTGTATGTCTCCATCTATTGATGAGGGTCTTACTCTTTTAGTATAAATAG  
TACCGTTAACTTCCAATTAAGTATTTTGGACAACATTTCAA  
AAAAGAGTAATAAACTTCGCCTTAATTTTAATAATCAACACCCTCCTAGCCTTACTACTAATAATTATTACATTTTACT  
ACCACAACCTCAACGGCTACATAGAAAAATCCACCCCTTAC  
GAGTGCAGCTTCGACCCTATATCCCCGCCCCGCTCCCTTTCTCCATAAAATTCTTCTTAGTAGCTATTACCTTCTTATT  
ATTTGATCTAGAAAATTGCCCTCCCTTTTACCCTTACCATGA  
GCCCTACAACAACCTAACCTGCCACTAATAGTTATGTTCATCCCTCTTATTAATCATCATCTAGCCCTAAGTCTGGCCTA  
TGAGTGACTACAAAAGGATTAGACTGAGCTGAATTGGTA  
TATAGTTTAAACAAAACGAATGATTTTCGACTCATTAAATTATGATAATCATATTTACCAAATGCCCTCATTACATAAA  
TATTATACTAGCATTACCATCTCACTTCTAGGAATACTA  
GTATATCGCTCACACCTCATATCCTCCCTACTATGCCTAGAAGGAATAATACTATCGCTGTTTATTATAGCTACTCTCAT  
AACCTCAACACCCACTCCCTCTTAGCCAATATTGTGCCT  
ATTGCCATACTAGTCTTTGCCGCTGCGAAGCAGCGGTGGGCTAGCCCTACTAGTCTCAATCTCCAACACATATGGCCT  
AGACTACGTACATAACCTAAACCTACTCCAATGCTAAAAC  
TAATCGTCCCAACAATTATATTACTACCACTGACATGACTTTCCAAAAAACACATAATTTGAATCAACACAACCACCCAC  
AGCCTAATTATTAGCATCATCCCCCTACTATTTTTTAAAC  
AAATCAACAACAACCTATTTAGCTGTTCCCAACCTTTTCTCCGACCCCTAACAAACCCCTCCTAATACTAACTACC  
TGACTCCTACCCCTCACAATCATGGCAAGCCAACGCCACT  
TATCCAGTGAACCACTATCACGAAAAAACTCTACCTCTCTATACTAATCTCCCTACAAATCTCCTTAATTATAACATTC  
ACAGCCACAGAATAATCATATTTTATATCTTCTTCGAAA  
CCACACTTATCCCCACCTTGGCTATCATCACCCGATGAGGCAACCAGCCAGAACGCCTGAACGCAGGCACATACTTCCTA  
TTCTACACCCTAGTAGGCTCCCTTCCCCTACTCATCGCAC  
TAATTTACTACTACAACACCCTAGGCTCACTAAACATTCTACTACTACTCTCACTGCCCCAAGAACTATCAAACCTCCTGA  
GCCAACAAGTAAATATGACTAGCTTACACAATAGCTTTTA  
TAGTAAAGATACTCTTTACGGACTCCACTTATGACTCCCTAAAGCCCATGTGCAAGCCCCCATCGCTGGGTCAATAGTA  
CTTGCCGCGAGTACTCTTAAACTAGGCGGCTATGGTATAA  
TACGCCTCACACTCATTCTCAACCCCTGACAAAACACATAGCCTACCCCTTCTTGTACTATCCCTATGAGGCATAATT  
ATAACAAGCTCCATCTGCCTACGACAAAACAGACCTAAAAT  
CGCTCATTGCATACTCTTCAATCAGCCACATAGCCCTCGTAGTAACAGCCATTCTCATCCAAACCCCTGAAGCTTACC  
GGCGCAGTCACTTCTCATAATCGCCCACGGACTTACATCCT  
CATTACTATTCTGCCTAGCAAACCTCAAACCTACGAACGCCTCACAGTCGCATCATAATCCTCTCTCAAGGACTTCAAACCT  
CTACTCCCACTAATAGCTTTTTTGTAGACTTCTAGCAAGCC  
TCGCTAACCTCGCCTTACCCCTTACTATTAACCTACTGGGAGAATCTCTGTGCTAGTAACCACATTCTCCTGATCAAAT  
ATCACTCTCCTACTTACAGGACTCAACATACTAGTCACAA  
CCCTATACTCCCTCTACATATTTACCACAACACAATGGGGCTCACTCACCCACCACATTAACAACATAAAACCCCTCATT  
ACACGAGAAAACACCCTCATGTTTATACACCTATCCCCCA  
TTCTCCTCCTATCCCTCAACCCCGACATCATTACCGGGTTTTCTCTTGTAAATATAGTTTTAACAAAACATCAGATTGT  
GAATCTGACAACAGAGGCTTACGACCCCTTATTTACCGAG  
AAAGCTCACAAGAAGTGAATCATGCCCCCATGTCTAACAACATGGCTTTCTCAACTTTTAAAGGATAACAGCTATCC  
ATTGGTCTTAGGCCCCAAAAATTTTGGTGCAACTCCAAAT  
AAAAGTAATAACCATGCACACTACTATAACCACCCTAACCCCTGACTTCCCTAATTCCCCCATCCTTACCACCCTCGTTA  
ACCCTAACAAAAAAACTCATACCCCAATTATGTAAAATC  
CATTGTGCGATCCACCTTTATTATCAGTCTCTTCCCCACAACAATATTATCATGTGCCTAGACCAAGAAGTTATTATCTCGA  
ACTGACACTGAGCCACAACCCAAACAACCCAGCTCTCCCT  
AAGCTTCAAACCTAGACTACTTCTCCATAATATTATCCCTGTAGCATTGTTGTTACATGGTCCATCATAGAATTCTCAC  
TGTGATATATAAACTCAGACCCGAACATTAATCAGTTCTT  
CAAATATCTACTCATTTCCTAATTACCATACTAATCTTAGTTACCGCTAACAAACCTATTCCAACCTGTTTATCGGCTGAG  
AGGGCGTAGGAATTATATCCTTCTTGTCTCATCAGTTGATG  
ATACGCCCGAGCAGATGCCAACACAGCAGCCATTCAAGCAATCCTATACAACCGTATCGGCGATATCGGTTTATCCTCG  
CCTTAGCATGATTTATCCTACTCCAACCTCATGAGACCC  
ACAACAATAGCCCTTCTAAACGCTAATCCAAGCCTCACCCCACTACTAGGCTCCTCCTAGCAGCAGCAGGCAAATCAG  
CCCAATTAGGTCTCCACCCCTGACTCCCTCAGCCATAGA

AGGCCCCACCCAGTCTCAGCCCTACTCCACTCAAGCACTATAGTTGTAGCAGGAATCTTCTTACTCATCCGCTTCCACC  
CCCTAGCAGAAAATAGCCCACTAATCCAAACTCTAACACT  
ATGCTTAGGCGCTATCACCCTCTGTTTCGAGCAGTCTGCGCCCTTACACAAAATGACATCAAAAAAATCGTAGCCTTCT  
CCACTTCAAGTCAGCTAGGACTCATAATAGTTACAATCGG  
CATCAACCAACCACACCTAGCATTCTGCACATCTGTACCCACGCCTTCTTCAAAGCCATACTATTTATGTGCTCCGGGT  
CCATCATCCACAACCTTAACAATGAACAAGATATTCGAAA  
AATAGGAGGACTACTCAAACCATACTCTCACTTCAACCTCCCTCACCATTGGCAGCCTAGCATTAGCAGGAATACCTT  
TCCTCACAGGTTTCTACTCCAAAGACCACATCATCGAAAC  
CGCAAACATATCATAACAAACGCCTGAGCCCTATCTATTACTCTCATCGCTACCTCCCTGACAAGCGCCTATAGCACTC  
GAATAATTCTTCTCACCTAACAGGTCAACCTCGCTTCCC  
CACCTTACTAACATTAACGAAAATAACCCACCTACTAAACCCATTAAACGCCTGGCAGCCGGAAGCCTATTTCGAG  
GATTTCTCATTACTAACAAACATTTCCCCCGCATCCCCCTT  
CCAAACAACAATCCCCCTCTACCTAAAACCTCACAGCCCTCGCTGTACCTTCTTAGGACTTCTAACAGCCCTAGACCTCA  
ACTACCTAACCAACAAACTTAAAATAAAATCCCCACTATG  
CACATTTTATTTCTCCAACATACTCGGATTCTACCCTAGCATCACACACCCGCACAATCCCCTATCTAGGCCTTCTTACGA  
GCCAAAACCTGCCCTACTCCTCCTAGACCTAACCTGACT  
AGAAAAGCTATTACCTAAAACAATTTACAGCACCAAATCTCCACCTCCATCATCACCTCAACCCAAAAAGGCATAATTA  
AACTTTACTTCTCTCTTTCTTCTTCCACTCATCCTAAC  
CCTACTCCTAATCACATAACCTATTCCCCGAGCAATCTCAATTACAATATATACACCAACAAACAATGTTCAACCAGTA  
ACTACTACTAATCAACGCCATAATCATACAAAGCCCCCG  
CACCAATAGGATCCTCCCGAATCAACCCTGACCCCTCTCCTTATAAATTATTTCAGCTTCTTACACTACTAAAGTTTACC  
ACAACCACCACCCCATCATACTCTTTCACCCACAGCACCA  
ATCCTACCTCCATCGCTAACCCCACTAAAACACTCACCAAGACCTCAACCCCTGACCCCATGCCTCAGGATACTCCTCA  
ATAGCCATCGCTGTAGTATATCCAAAGACAACCATCATTC  
CCCCTAAATAAATTAATAAACTATTAAACCCATATAACCTCCCCAAAATTGAGAATAATAACACACCCGACCACACCG  
CTAACAAATCAATACTAAACCCCATAAATAGGAGAAGGCT  
TAGAAGAAAACCCACAAACCCCACTAAACCCACACTCAACAGAAAACAAAGCATAACATCATTATTCTCGCACGGACT  
ACAACCACGACCAATGATATGAAAAACCATCGTTGTATTT  
CAACTACAAGAACACCAATGACCCCAATACGCAAAATTAACCCCTAATAAAACTAATTAACCACTCATTTCATCGACCTC  
CCCACCCATCCAACATCTCCGCATGATGAAACTTCGGCT  
CACTCCTTGGCGCCTGCCTGATCCTCAAATCACCACAGGACTATTCTAGCCATGCACTACTCACCAGACGCCTCAACC  
GCCTTTTTCATCAATCGCCACATCACTCGAGACGTAAATT  
ATGGCTGAATCATCCGCTACCTTCACGCCAATGGCGCCTCAATATTCTTTATCTGCCTCTTCTTACACATCGGACGAGGC  
CTATATTACGGATCATTCTCTACTCAGAAACCTGAAACA  
TCGGCATTATCCTCCTGCTTGCAACTATAGCAACAGCCTTCATAGGCTATGTCTCCCGTGAGGCCAAATATCATTCTGA  
GGGGCCACAGTAATTACAACTTACTATCCGCCACCCAT  
ACATTGGGACAGACCTAGTTCAATGAATCTGAGGAGGCTACTCAGTAGACAGTCCCACCCTCACACGATTCTTTACCTTT  
CACTTCATCTTACCCTTCATTATTGCAGCCCTAGCAGCAC  
TCCACCTCCTATTCTTGACGAAACGGGATCAAACAACCCCTAGGAATCACCTCCCATTCCGATAAAATCACCTTCCAC  
CCTTACTACACAATCAAAGACGCCCTCGGCTTACTTCTCT  
TCCTTCTCTCCTTAATGACATTAACACTATTCTCACCTGACCTCCTAGGCGACCCAGACAATTATACCCTAGCCAACCC  
TTAAACACCCCTCCCCACATCAAGCCCGAATGATATTTCC  
TATTGCCTACACAATTCTCCGATCCGTCCCTAACAACTAGGAGGCGTCTTGGCCCTATTACTATCCATCCTCATCCTA  
GCAATAATCCCCATCCTCCATATATCCAAACAACAAAGCA  
TAATATTTGCCCCACTAAGCCAATCACTTTATTGACTCCTAGCCGCAGACCTCCTCATTCTAACCTGAATCGGAGGACAA  
CCAGTAAGCTACCCTTTTACCATCATTGGACAAGTAGCAT  
CCGTACTATACTTACAACAATCCTAATCCTAATACCAACTATCTCCCTAATTGAAAACAAAATACTCAAATGGGCCTGT  
CCTTGTAGTATAAACTAATAACACAGTCTTGTAAACCGGA  
GATGAAAACCTTTTTCCAAGGACAAATCAGAGAAAAAGTCTTTAACTCCACCATTAGCACCCAAAGCTAAGATTCTAATT  
TAAACTATT

#ASIA Indian

CCACAGTTTATGTAGCTTACCTCCTCAAAGCAATACACTGAAAATGTTTGTAGACGGGCTCACATCACCCCATAAACAATA  
GGTTTGGTCTTAGCCTTTCTATTAGCTCTTAGTAAGATTA  
CACATGCAAGCATCCCCGTTCCAGTGAGTTACCCTCTAAATCACCACGATCAAAGGGACAAGCATCAAGCACGCAGCA  
ATGCAGCTCAAACGCTTAGCCTAGCCACACCCCCACGGG

AAACAGCAGTGATTAACCTTTAGCAATAAACGAAAGTTTAACTAAGCTATACTAACCCCAGGGTTGGTCAATTTTCGTGCC  
AGCCACCGCGGTACACGATTAACCCAAGTCAATAGAAGC  
CGGCGTAAAGAGTGTTTTAGATCACCCCCTCCCAATAAAGCTAAAACCTCACCTGAGTTGTAAAAAACTCCAGTTGACAC  
AAAATAGACTACGAAAGTGGCTTTAACATATCTGAACACA  
CAATAGCTAAGACCCAAACTGGGATTAGATACCCCCTATGCTTAGCCCTAAACCTCAACAGTTAAATCAACAAAACCTGC  
TCGCCAGAACACTACGAGCCACAGCTTAAAACCTCAAAGGA  
CCTGGCGGTGCTTCATATCCCTCTAGAGGAGCCTGTTCTGTAATCGATAAACCCCGATCAACCTCACCACCTCTTGCTCA  
GCCTATATACCGCCATCTTCAGCAAACCCTGATGAAGGCT  
ACAAAGTAAGCGCAAGTACCCACGTAAGACGTTAGGTCAAGGTGTAGCCCATGAGGTGGCAAGAAATGGGCTACATTTT  
CTACCCAGAAAACCTACGATAGCCCTTATGAAAACCTAAGG  
GTGGAAGGTGGATTTAGCAGTAAACTGAGAGTAGAGTGCTTAGTTGAACAGGGCCCTGAAGCGGTACACACCGCCCGTC  
ACCCTCCTCAAGTATACTTCAAAGGACATTTAACTAAAAC  
CCCTACGCATTTATATAGAGGAGACAAGTCGTAACATGGTAAGTGTACTGGAAAGTGCACCTTGACGAACCAGAGTGTAG  
CTTAACACAAAGCACCCAACTTACACTTAGGAGATTTCAA  
CTTAACCTTGACCGCTCTGAGCTAAACCTAGCCCCAAACCCACTCCACCTTACTACCAGACAACCTTAGCCAAACCATTTA  
CCCAAATAAAGTATAGGCGATAGAAATTGAAACCTGGCGC  
AATAGATATAGTACCGCAAGGGAAAGATGAAAAATTATAACCAAGCATAATATAGCAAGGACTAACCCCTATACCTTCTG  
CATAATGAATTAAGTAACTAGAAATAACTTTGCAAGGAGAGCCA  
AAGCTAAGACCCCCGAAACCAGACGAGCTACCTAAGAACAGCTAAAAGAGCACACCCCGTCTATGTAGCAAAAATAGTGGGA  
AGATTTATAGGTAGAGGCGACAAACCTACCGAGCCTGGTG  
ATAGCTGGTTGTCCAAGATAGAATCTTAGTTCAACTTTAAATTTGCCACAGAACCCTCTAAATCCCCTTGTAATTTAA  
CTGTTAGTCCAAGAGGAACAGCTCTTTGGACACTAGGAA  
AAAACCTTGTAGAGAGAGTAAAAAA-  
TTTAACACCCATAGTAGGCCTAAAAGCAGCCACCAATTAAGAAAGCGTTCAAGCTCAACACCCACTACCTAAAAAA-  
TCCCAAACATATAACTG  
AACTCCTCACACCCAATTGGACCAATCTATCACCCCTATAGAAGAATAATGTTAGTATAAGTAACATGAAAACATTCTCC  
TCCGCATAAGCCTGCGTCAGATTAACCAACTGAACTGACA  
ATTAACAGCCCAATATCTACAATCAACCAACAGTCAATATTACCCTCACTGTCAACCCAACACAGGCATGCTCATAAGG  
AAAGGTTAAAAAAGTAAAAGGAACCTCGGCAAACTTTACC  
CCGCCTGTTTACCAAAAACATCACCTCTAGCATCACAGTATTAGAGGCACCGCCTGCCAGTGACACATGTTTAAACGGC  
CGCGGTACCCTAACCGTGCAAAGGTAGCATAATCACTTGT  
TCCTTAAATAGGGACCTGTATGAATGGCTCCACGAGGGTTTCACTGTCTCTTACTTTTAAACCAGTGAAATTGACCTGCC  
GTGAAGAGGCGGGCATGACACAGCAAGACGAGAAGACCT  
ATGGAGCTTTAATTTATTAATGCAAACAGTACCTAACAAACCCACAGGTCTTAACTACCAAACCTGCATTAATAAATTTT  
GGTTGGGGCGACCTCGGAGCAGAACCAACCTCCGAGCAG  
TACATGCTAAGACTTCACCAGTCAAAGCGAACTACTATACTCAATTGATCCAATAACTTGACCAACGGAACAAGTTACCC  
TAGGGATAACAGCGCAATCCTATTCTAGAGTCCATATCAA  
CAATAGGGTTTACGACCTCGATGTTGGATCAGGACATCCCGATGGTGCAGCCGCTATTAAGGTTTCGTTTGTTCACGAT  
TAAAGTCTACGTGATCTGAGTTCAGACCGGAGTAATCCA  
GGTCGGTTTTCTATCTACTTCAAATTCCTCCCTGTACGAAAGGACAAGAGAAATAAGGCCTACTTCACAAAGCGCCTTCCC  
CCGTAAATGATATCATCTCAACTTAGTATTATACCCACAC  
CCACCCAAGAACAGGGTTTGTAAAGATGGCAGAGCCCGGTAATCGCATAAACTTAAAACCTTTACAGTCAGAGGTTCAAT  
TCCTCTTCTTAAACAACATACCCATGGCCAACCTCCTACTC  
CTCATTGTACCCATTCTAATCGCAATGGCATTCTAATGCTTACCGAACGAAAAATTCTAGGCTATATACAACCTACGCAA  
AGGCCCAACGTTGTAGGCCCTACGGGCTACTACAACCC  
TTCGCTGACGCCATAAACTCTTACCAAAGAGCCCCTAAAACCCGCCACATCTACCATCACCTCTACATCACCGCCCC  
GACCTTAGCTCTCACCATCGCTCTTCTACTATGAACCCCC  
CTCCCCATAACCAACCCCTGGTCAACCTCAACCTAGGCCTCTATTTATTCTAGCCACCTCTAGCCTAGCCGTTTACTC  
AATCCTCTGATCAGGGTGAGCATCAAACCTCAAACCTACGCC  
CTGATCGGGCCTGCGAGCAGTAGCCCAAACAATCTCATATGAAGTACCCTAGCCATCATTCTACTATCAACATTACT  
AATAAGTGGCTCCTTTAACCTCTCCACCCTTATCACAACA  
CAAGAACACCTCTGATTACTCCTGCCATCATGACCCTTGCCATAATATGATTTATCTCCACACTAGCAGAGACCAACCG  
AACCCCTTCGACCTTGCCGAAGGGGAGTCCGAACCTAGTC  
TCAGGCTTCAACATCGAATACGCCGAGGCCCTTCGCCCTATTCTTCATAGCCGAATACACAAACATTATTATAATAAA  
CACCCCTCACCACTACAATCTTCTAGGAACAACATATGAC  
GCACTCTCCCCTGAACTCTACACAACATATTTTGTACCAAGACCCTACTTCTAACCTCCCTGTTCTTATGAATTCGAAC  
AGCATACCCCGATTCCGCTACGACCAACTCATAACCTC

CTATGAAAAAATTCTTACCCTCACCTAGCATTACTTATATGATATGTCTCCATACCCATTACAATCTCCAGCATTCC  
CCCTCAAACCTAAGAAATATGTCTGATAAAAGAGTTACTT  
TGATAGAGTAAATAATAGGAGCTTAAACCCCCTTATTTCTAGGACTATGAGAATCGAACCCATCCCTGAGAATCCAAAAT  
TCTCCGTGCCACCTATCACACCCCATCCTAAAGTAAGGTC  
AGCTAAATAAGCTATCGGGCCATACCCCGAAAATGTTGGTTATACCCCTCCCGTACTAATTAATCCCCTGGCCCAACCC  
GTCATCTACTCTACCATCTTTGCAGGCACACTCATCACAG  
CGCTAAGCTCGCACTGATTTTTTACCTGAGTAGGCCTAGAAATAAACATGCTAGCTTTTTATTCCAGTTCTAACCAAAAA  
ATAAACCCCTCGTTCACAGAAGCTGCCATCAAGTATTTCC  
TCACGCAAGCAACCGCATCCATAATCCTTCTAATAGCTATCCTCTTCAACAATATACTCTCCGGACAATGAACCATAACC  
AATACTACCAATCAATACTCATCATTAAATAATCATAATGG  
CTATAGCAATAAAACTAGGAATAGCCCCCTTTCACTTCTGAGTCCCAGAGGTTACCCAAGGCACCCCTCTGACATCCGGC  
CTGCTTCTTCTCACATGACAAAAACTAGCCCCCATCTCAA  
TCATATAACCAATCTCTCCCTCACTAAACGTAAGCCTTCTCCTCACTCTCTCAATCTTATCCATCATAGCAGGCAGTTGA  
GGTGGATTAACCAAAACCCAGCTACGCAAAATCTTAGCAT  
ACTCCTCAATTACCCACATAGGATGAATAATAGCAGTTCTACCGTACAACCCTAACATAACCATTCTTAATTTAACTATT  
TATATTATCCTAACTACTACCGCATTCTACTACTCAACT  
TAAACTCCAGCACCACGACCCTACTACTATCTCGCACCTGAAACAAGCTAACATGACTAACACCCTTAATTCCATCCACC  
CTCCTCTCCCTAGGAGGCCTGCCCCGCTAACCGGCTTTT  
TGCCCAAATGGGCCATTATCGAAGAATTCACAAAAACAATAGCCTCATCATCCCCACCATCATAGCCACCATCACCCCTC  
CTTAACCTCTACTTCTACCTACGCCTAATCTACTCCACCT  
CAATCACACTACTCCCATATCTAACAACGTA AAAATAAAATGACAGTTTGAACATACAAAACCCACCCCATTCCTCCCC  
ACACTCATCGCCCTTACCACGCTACTCCTACCTATCTCCC  
CTTTTATACTAATAATCTTATAGAAATTTAGGTTAAATACAGACCAAGAGCCTTCAAAGCCCTCAGTAAGTTGCAATACT  
TAATTTCTGTAACAGCTAAGGACTGCAAAACCCCACTCTG  
CATCAACTGAACGCAAAATCAGCCACTTTAATTAAGCTAAGCCCTTACTAGACCAATGGGACTTAAACCCACAAACACTTA  
GTAAACAGCTAAGCACCCCTAATCAACTGGCTTCAATCTAC  
TTCTCCCGCCGCGGGAAAAAAGGCGGGGAGAAGCCCCGGCAGGTTTGAAGCTGCTTCTTCGAATTTGCAATTC AATATGA  
AAATCACCTCGGAGCTGGTAAAAAGAGGCCTAACCCCTGT  
CTTTAGATTTACAGTCCAATGCTTCACTCAGCCATTTTTACCTCACCCCTC  
ACTGATGTTTCGCCGACCCTTACTATTCTCTACAAACCACAAAGACATTGGAACACTATACCTATTATTC  
GGCGCATGAGCTGGAGTCTTAGGCACAGCTCTAAGCCTCCTTATTCGAGCCGAGCTGGGCCAGCCAGGCAACCTTCTAGG  
TAACGACCACATCTACAACGTTATCGTACAGCCCATGCA  
TTTGTAAATAATCTTCTTCATAGTAATACCCATCATAATCGGAGGCTTTGGCAACTGACTAGTTCCCTAATAATCGGTGC  
CCCCGATATGGCGTTTTCCCGCATAAAACAACATAAGCTTC  
TGACTCTTACCTCCCTCTCTCCTACTCCTGCTCGCATCTGCTATAGTGGAGGCCGAGCAGGAACAGGTTGAACAGTCTA  
CCCTCCCTTAGCAGGGAACACTCCCACCCTGGAGCCTCC  
GTAGACCTAACCATCTTCTCCTTACACCTAGCAGGTGTCTCCTCTATCTTAGGGGCCATCAATTTTCATCACAAACATTAT  
CAATATAAAACCCCTGCCATAACCCAATACCAAACGCC  
CTCTTCGTCTGATCCGTCTAATCACAGCAGTCTACTTCTCCTATCTCTCCAGTCTTAGCTGCTGGCATCACTATACT  
ACTAACAGACCGCAACCTCAACACCACCTTCTTCGACCCC  
GCCGGAGGAGGAGACCCATTCTATACCAACACCTATTCTGATTTTTTCGGTACCCTGAAGTTTATATTCTTATCCTACC  
AGGCTTCGGAATAATCTCCCATATTGTAACCTTACTACTCC  
GGAAAAAAGAACCATTTGGATACATAGGTATGGTCTGAGCTATGATATCAATTGGCTTCTTAGGGTTTATCGTGTGAGC  
ACACCATATATTTACAGTAGGAATAGACGTAGACACACGA  
GCATATTTACCTCCGCTACCATAATCATCGCTATCCCCACCGCGTCAAAGTATTTAGCTGACTCGCCACACTCCACGG  
AAGCAATATGAAATGATCTGCTGCAGTGTCTGAGCCCTA  
GGATTCATCTTTCTTTTACCCTAGGTGGCCTGACTGGCATTGTATTAGCAAACCTCATCACTAGACATCGTACTACACGA  
CACGTACTACGTTGTAGCTCACTTCCACTATGTCCTATCA  
ATAGGAGCTGATTTTCCATCATAGGAGGCTTCATTCACTGATTTCCCTATTCTCAGGCTACACCCTAGACCAAACCTA  
CGCCAAAATCCATTTCACTATCATATTCATCGGCGTAAAT  
CTAACTTTCTTCCACAACACTTTCTCGGCCTATCCGGAATGCCCCGACGTTACTCGGACTACCCCGATGCATACACCAC  
ATGAAACATCCTATCATCTGTAGGCTCATTCAATTTCTCTA  
ACAGCAGTAATATTAATAATTTTCATGATTTGAGAAGCCTTCGCTTCGAAGCGAAAAGTCTAATAGTAGAAGAACCCTC  
CATAAACCTGGAGTGACTATATGGATGCCCCCACCCTAC  
CACACATTCGAAGAACCCGTATACATAAAAATCTAGACAAAAAAGGAAGGAATCGAACCCCCCAAAGCTGGTTTTCAAGCCA  
ACCCCATGGCCTCCATGACTTTTTTCAAAAAGGTATTAGAA

AAACCATTTTCATAACTTTGTCAAAGTTAAATTATAGGCTAAATCCTATATATCTTAATGGCACATGCAGCGCAAGTAGGT  
CTACAAGACGCTACTTCCCCTATCATAGAAGAGCTTATCA  
CCTTTTCATGATCACGCCCTCATAATCATTTTTCTTATCTGCTTCTTAGTCTGTATGCCCTTTTCTTAACACTCACAACA  
AAACTAATAACTAATAACATCTCAGACGCTCAGGAAATAG  
AAACCGTCTGAACCTATCCTGCCCCCATCATCCTAGTCTCATCGCCCTCCCATCCCTACGCATCCTTTACATAACAGAC  
GAGGTCAACGATCCCTCCCTTACCATCAAATCAATTGGCC  
ACCAATGGTACTGAACCTACGAGTACACCGACTACGGCGGACTAATCTTCAACTCCTACATACTTCCCCATTATTCTTA  
GAACCAGGCGACCTGCGACTCCTTGACGTTGACAATCGAG  
TAGTACTCCCGATTGAAGCCCCATTTCGTATAATAATTACATCACAAGACGTCTTGCACTCATGAGCTGTCCCCACATTA  
GGCTTAAAAACAGATGCAATTCCTGGGACGTCTAAACAAA  
CCACTTTCACCGCTACACGACCGGGGTATACTACGGTCAATGCTCTGAAATCTGTGGAGCAAACCACAGTTTTTCATGCC  
ATCGTCTTAGAATTAATTTCCCCTAAAAATCTTTGAAATAG  
GGCCCGTATTTACCCTATAGCACCCCTCTACCCCTCTAGAGCCCCTGTAAAGCTAAGCTTAGCATTAACTTTTAAAGT  
TAAAGATTAAGAGAACCAACACCTCTTTACAGTGAAATGC  
CCCACTAAATACTACCGTATGGCCACCATAATTACCCCTACTCCTTACACTATTCTCATCACCCAACTAAAAATA  
TTAAACACAACTACCACCTACCTCCCTCACCAAGCCCA  
TAAAAATAAAAAATTATAACAAACCCTGAGAACCAAAATGAACGAAAATCTGTTTCGCTTCATTTCATTGCCCCACAACTC  
TAGGCCTACCCGCGCAGTACTGATCATTCTATTTCCCC  
TCTATTGATCCCCACCTCCAAATATCTCATCAACAACCGACTAATCACCACCAACAATGACTAATCAAACCTAACCTCAA  
AACAAATGATAGCCATACACAACACTAAAGGACGAACCTG  
ATCTCTTATACTAGTATCCTTAATCATTTTTTATTGCCACAATAACCTCCTCGGACTCCTGCCTCACTCATTTACACCAA  
CCACCCAATCTATAAACCTAGCCATGGCCATCCCCTT  
ATGAGCGGGCGCAGTGATTACAGGCTTTTCGCTCTAAGATTAATAATGCCCCTAGCCCACTTCTTACCACAAGGCACACCTA  
CACCCCTTATCCCCATACTAGTTATTATCGAAACCATCAG  
CCTACTCATTCAACCAATAGCCCTGGCCGTACGCCTAACCGCTAACATTACTGCAGGCCACCTACTCATGCACCTAATTG  
GAAGCGCCACCCTAGCAATATCAACCATTAACCTTCCCTC  
TACTTATCATCTTCACAATTCTAATTCTACTGACTATCCTAGAAATCGCTGTGCCTTAATCCAAGCCTACGTTTTCA  
CACTTCTAGTAAGCCTCTACCTGCACGACAACACATAATG  
ACCCACCAATCACATGCCTATCATATAGTAAAAACCCAGCCCATGACCCCTAACAGGGGCCCTCTCAGCCCTCCTAATGAC  
CTCCGGCCTAGCCATGTGATTTCACTTCCACTCCATAACG  
CTCCTCATACTAGGCCTACTAACCAACACACTAACCATATACCAATGATGGCGCGATGTAACACGAGAAAGCACATACCA  
AGGCCACCACACACCACCTGTCCAAAAGGCCTTTCGATAC  
GGGATAATCCTATTTATTACCTCAGAAGTTTTTTTTCTTCGAGGATTTTTCTGAGCCTTTTACCCTCCAGCCTAGCCCC  
TACCCCAACTAGGAGGGCACTGGCCCCAACAGGCATC  
ACCCCGCTAAATCCCCTAGAAGTCCCACTCCTAAACACATCCGTATTACTCGCATCAGGAGTATCAATCACCTGAGCTCA  
CCATAGTCTAATAGAAAACAACCGAAACCAATAATTCAA  
GCACTGCTTATTACAATTTTACTGGGTCTCTATTTTACCCTCCTACAAGCCTCAGAGTACTTCGAGTCTCCCTTACCCT  
TTCCGACGGCATCTACGGCTCAACATTTTTTTGTAGCCACA  
GGCTTCCACGGACTTTCAGTCAATTTGGCTCAACTTTCTCCTACTATCTGCTTTCATCCGCCAACTAATATTTCACTTTAC  
ATCCAAACATCACTTTGGCTTTCGAAGCCGCGCCTGATAC  
TGGCATTGTTGTAGATGTGGTTTTGACTATTTCTGTATGTCTCCATCTATTGATGAGGGTCTTACTCTTTTAGTATAAATAG  
TACCGTTAACTTCCAATTAAGTATTTTGGACAACATTTCAA  
AAAAGAGTAATAAACTTCGCCTTAATTTTAATAATCAACACCCTCCTAGCCTTACTACTAATAATTATTACATTTTACT  
ACCACAACCTCAACGGCTACATAGAAAAATCCACCCCTTAC  
GAGTGGCGCTTCGACCCTATATCCCCGCCCCGCTCCCTTTCTCCATAAAATTCTTCTTAGTAGCTATTACCTTCTTATT  
ATTTGATCTAGAAATTGCCCTCCTTTTACCCTTACCATGA  
GCCCTACAAAACAACTAACCTGCCACTAATAGTTATGTCTATCCCTCTTATTAATCATCATCCTAGCCCTAAGTCTGGCCTA  
TGAGTGACTACAAAAGGATTAGACTGAGCTGAATTGGTA  
TATAGTTTTAAACAAAACGAATGATTTTCGACTCATTAAATTATGATAATCATATTTACCAAATGCCCTCATTACATAAA  
TATTATACTAGCATTACCATCTCACTTCTAGGAATACTA  
GTATATCGCTCACACCTCATATCCTCCCTACTATGCCTAGAAGGAATAATACTATCGCTGTTTCATTATAGCTACTCTCAT  
AACCCCTCAACACCCACTCCCTCTTAGCCAATATTGTGCCT  
ATTGCCATACTAGTCTTTGCCGCTGCGAAGCAGCGGTGGGCCTAGCCCTACTAGTCTCAATCTCCAACACATATGGCCT  
AGACTACGTACATAACCTAAACCTACTCCAATGCTAAAAC  
TAATCGTCCCAACAATTATATTACTACCACTGACATGACTTTCCAAAAAACACATAATTTGAATCAACACAACCACCCAC  
AGCCTAATTATTAGCATCATCCCCCTACTATTTTTTAACC

AAATCAACAACAACCTATTTAGCTGTTCCCCAACCTTTTTCTCCGACCCCTAACAACCCCTCCTAATACTAACTACC  
TGACTCCTACCCCTCACAATCATGGCAAGCCAACGCCACT  
TATCCAGTGAACCACTATCACGAAAAAACTCTACCTCTCTATACTAATCTCCCTACAAATCTCCTTAATTATAACATTC  
ACAGCCACAGAATAATCATATTTTATATCTTCTTCGAAA  
CCACACTTATCCCCACCTTGGCTATCATCACCCGATGAGGCAACCAGCCAGAACGCCTGAACGCAGGCACATACTTCCTA  
TTCTACACCCTAGTAGGCTCCCTTCCCCTACTCATCGCAC  
TAATTTACACTCACAACACCCTAGGCTCACTAAACATTCTACTACTACTCTACTGCCCAAGAACTATCAAACCTCTGA  
GCCAACAACCTTAATATGACTAGCTTACACAATAGCTTTTA  
TAGTAAAGATACCTCTTTACGGACTCCACTTATGACTCCCTAAAGCCCATGTGGAAGCCCCATCGCTGGGTCAATAGTA  
CTTGCCGCAGTACTCTTAAACTAGGCGGCTATGGTATAA  
TAGCCCTCACACTATTCTCAACCCCTGACAAAACATAGCCTACCCCTTCTTGTACTATCCCTATGAGGCATAATT  
ATAACAAGCTCCATCTGCCTACGACAACAGACCTAAAAT  
CGCTCATTGCATACTCTTCAATCAGCCACATAGCCCTCGTAGTAACAGCCATTCTCATCCAAACCCCTGAAGCTTCACC  
GGCGCAGTCACTTCTATAATCGCCCACGGACTTACATCCT  
CATTACTATTCTGCCTAGCAAACCTCAAACCTACGAACGCCTCACAGTCGCATCATAATCCTCTCTCAAGGACTTCAAACCT  
CTACTCCACTAATAGCTTTTTGATGACTTCTAGCAAGCC  
TCGCTAACCTCGCCTTACCCCCCACTATTAACCTACTGGGAGAAGCTCTCTGTGCTAGTAACCACGTTCTCCTGATCAAAT  
ATCACTCTCCTACTTATAGGACTCAACATACTAGTCACAG  
CCCTATACTCCCTCTACATATTTACCACAACACAATGAGGCTCACTCACCCACCACATTAACAACATAAAACCCCTCATTC  
ACACGAGAAAACACCCTCATGTTTATACACCTATCCCCCA  
TTCTCCTCCTATCCCTCAACCCCGACATCATTACCGGGTTTTCTCTTGTAAATATAGTTTTAACAAAACATCAGATTGT  
GAATCTGACAACAGAGGCTTACGACCCCTTATTTACCGAG  
AAAGCTCACAAGAAGTCTAAGTCTGACCCCATGTCTAACAACATGGCTTTCTCAACTTTTAAAGGATAACAGCTATCC  
ATTGGTCTTAGGCCCAAAAATTTTGGTGCAACTCCAAT  
AAAAGTAATAACCATGCACACTACTATAACCACCCTAACCCCTGACTTCCCTAATTCCCCCATCCTTACCACCCTCGTTA  
ACCCTAACAAAAAACTCATACCCCACTTATGTAAAATC  
CATTGTGCATCCACCTTTATTATCAGTCTCTTCCCCACAACAATATTCATGTGCCTAGACCAAGAAGTTATTATCTCGA  
ACTGACACTGAGCCACAACCCAAAACAACCCAGCTCTCCCT  
AAGCTTCAAACCTAGACTACTTCTCATAATATTTCACTCCCTGTAGCATTGTTGTTACATGGTCCATCATAGAATTCTCAC  
TGTGATATATAAACTCAGACCCAAAACATTAATCAGTTCTT  
CAAATATCTACTCATTTTTCTAATTACATACTAATCTTAGTTACCGCTAACAACCTATTCCAAGTTCATCGGCTGAG  
AGGGCGTAGGAATTATATCCTTCTTGCTCATCAGTTGATG  
ATACGCCCCGAGCAGATGCCAACACAGCAGCCATTCAAGCAATCCTATAACAACCGTATCGGCGATATCGGTTTTATCCTCG  
CCTTAGCATGATTTATCCTACTCCAACCTCATGAGACCC  
ACAACAATAGCCCTTCTAAACGCTAATCCAAGCCTCACCCCACTACTAGGCCTCCTCCTAGCAGCAGCAGGCAAATCAG  
CCCAATTAGGTCTCCACCCCTGACTCCCCTCAGCCATAGA  
AGGCCCCACCCAGTCTCAGCCCTACTCCACTCAAGCACTATAGTTGTAGCAGGAATCTTCTTACTCATCCGCTTCCACC  
CCCTAGCAGAAAATAGCCCACTAATCCAAACTCTAACACT  
ATGCTTAGGCGCTATCACCCTCTGTTTCGAGCAGTCTGCGCCCTTACACAAAATGACATCAAAAAAATCGTAGCCTTCT  
CCACTTCAAGTCAACTAGGACTCATAATAGTTACAATCGG  
CATCAACCAACCACACCTAGCATTCTGCACATCTGTACCCACGCCTTCTTCAAAGCCATACTATTTATGTGCTCCGGGT  
CCATCATCCACAACCTTAAACAATGAACAAGATATTCGAAA  
AATAGGAGGACTACTCAAACCATACCTCTCACTTCAACCTCCCTCACCATTGGCAGCCTAGCATTAGCAGGAATACCTT  
TCCTCACAGGTTTCTACTCCAAAGACCACATCATCGAAAC  
CGCAAACATATCATACAAAACGCCTGAGCCCTATCTATTACTCTCATCGCTACCTCCCTGACAAGCGCCTATAGCACTC  
GAATAATTCTTCTCACCCCTAACAGGTCAACCTCGCTTCCC  
CACCCCTTACTAACATTAACGAAAATAACCCCACTTAAACCCCATTAACGCCTGGCAGCCGGAAGCCTATTTCGAG  
GATTTCTCATTACTAACAACATTTCCCCCGCATCCCCCTT  
CCAAACAACAATCCCCCTCTACCTAAAACCTCACAGCCCTCGCTGTCACTTTCTTAGGACTTCTAACAGCCCTAGACCTCA  
ACTACCTAACCAACAACCTTAAAATAAAATCCCCACTATG  
CACATTTTATTTCTCCAACATACTCGGATTCTACCCTAGCATCACACACCCGACAATCCCCCTATCTAGGCCTTCTTACGA  
GCCAAAACCTGCCCTACTCCTCCTAGACCTAACCTGACT  
AGAAAAGCTATTACCTAAAACAATTTACAGCACCAAATCTCCACCTCCATCATCACCTCAACCCAAAAGGCATAATTA  
AACTTTACTTCTCTCTTTCTTCTTCCCCTCATCCTAAC  
CCTACTCCTAATCACATAACCTATTTCCCCGAGCAATCTCAATTACAATATATACACCAACAACAATGTTCAACCAGTA  
ACTACTACTAATCAACGCCATAATCATACAAAGCCCCCG

CACCAATAGGATCCTCCCGAATCAACCCTGACCCCTCTCCTTCATAAATTATTTCAGCTTCTTACACTATTAAGTTTACC  
ACAACCACCACCCCATCATACTCTTTACCCACAGCACCA  
ATCCTACCTCCATCGCTAACCCCACTAAAACACTCACCAAGACCTCAACCCCTGACCCCATGCCTCAGGATACTCCTCA  
ATAGCCATCGCTGTAGTATATCCAAAGACAACCATCATT  
CCCCTAAATAAATTAATAAACTATTAACCCATATAACCTCCCCAAAATTTCAGAATAATAACACACCCGACCACACCG  
CTAACAACTAATACTAAACCCCATAAATAGGAGAAGGCT  
TAGAAGAAAACCCCAAAACCCCATTAATAACCCACACTCAACAGAAAACAAAGCATAACATCATTATTCTCGCACGGACT  
ACAACCACGACCAATGATATGAAAAACCATCGTTGTATTT  
CAACTACAAGAACACCAATGACCCCAATACGCAAAATTAACCCCTAATAAACTAATTAACCACTCATTTCATCGACCTC  
CCCACCCCATCCAACATCTCCGCATGATGAACTTCGGCT  
CACTCCTTGGCGCTGCCTGATCCTCCAAATCACCACAGGACTATTCTAGCCATGCACTACTCACCAGACGCCTCAACC  
GCCTTTTCATCAATCGCCACATCACTCGAGACGTAAATT  
ATGGCTGAATCATCCGCTACCTTCACGCCAATGGCGCCTCAATATTCTTTATCTGCCTCTTCTACACATCGGACGAGGC  
CTATATTACGGATCATTCTCTACTCAGAAACCTGAAACA  
TCGGCATTATCCTCCTGCTTGCAACTATAGCAACAGCCTTCATAGGCTATGTCTCCTCCCGTGAGGCCAAATATCATTCTGA  
GGGGCCACAGTAATTACAACTTACTATCCGCCATCCCAT  
ACATTGGGACAGACCTAGTTCAATGAATCTGAGGAGGCTACTCAGTAGACAGTCCCACCCTCACACGATTCTTTACCTTT  
CACTTCATCTTACCCTTCATTATTGCAGCCCTAGCAGCAC  
TCCACCTCCTATTCTTGACGAAACGGGATCAAACAACCCCTAGGAATCACCTCCCATTCCGATAAAATCACCTTCCAC  
CCTTACTACACAATCAAAGACACCCTCGGCTTACTTCTCT  
TCCTTCTCTCCTTAATGACATTAACACTATTCTCACCAGACCTCCTAGGCGACCCAGACAATTATACCCTAGCCAACCC  
TTAAACACCCCTCCCCACATCAAGCCCGAATGATATTTCC  
TATTGCCTACACAATTCTCCGATCCGTCCCTAACAACTAGGAGGCGTCTTGCCTTATTACTATCCATCCTCATCCTA  
GCAATAATCCCCATCCTCCATATATCCAAACAACAAAGCA  
TAATATTTGCGCCACTAAGCCAATCACTTTATTGACTCCTAGCCGAGACCTCCTCATTCTAACCTGAATCGGAGGACAA  
CCAGTAAGCTACCCTTTTACCATCATTGGACAAGTAGCAT  
CCGTACTATACTTCAACAATCCTAATCCTAATACCAACTATCTCCCTAATTGAAAACAAAATACTCAAATGGGCCTGT  
CCTTGTAGTATAAACTAATAACACCAGTCTTGTAAACCGGA  
GATGAAAACCTTTTTCCAAGGACAAATCAGAGAAAAGTCTTTAACTCCACCATTAGCACCCAAAGCTAAGATTCTAATT  
TAAACTATT

#ASIA Inuit

CCACAGTTTATGTAGCTTACCTCCTCAAAGCAATACACTGAAAATGTTTACGAGGGCTCACATCACCCCATAAACAAATA  
GGTTTGGTCTAGCCTTTCTATTAGCTCTTAGTAAGATTA  
CACATGCAAGCATCCCCGTTCCAGTGAGTTACCCTCTAAATCACCACGATCAAAGGGACAAGCATCAAGCACGCAGCA  
ATGCAGCTCAAAACGCTTAGCCTAGCCACACCCCCACGGG  
AAACAGCAGTGATTAACCTTTAGCAATAAACGAAAGTTTAACTAAGCTATACTAACCCAGGGTTGGTCAATTTCTGTGCC  
AGCCACCGCGGTACACGATTAACCCAAGTCAATAGAAGC  
CGGCGTAAAGAGTGTTTTAGATCACCCCTCCCCAATAAAGCTAAAACCTCACCTGAGTTGTAAAAACTCCAGTTGACAC  
AAAATAGACTACGAAAGTGGCTTTAACATATCTGAACACA  
CAATAGCTAAGACCCAACTGGGATTAGATACCCCACTATGCTTAGCCCTAAACCTCAACAGTTAAATCAACAAAACCTGC  
TCGCCAGAACACTACGAGCCACAGCTTAAAACCTCAAAGGA  
CCTGGCGGTGCTTCATATCCCTCTAGAGGAGCCTGTTCTGTAATCGATAAACCCCGATCAACCTCACCACCTCTTGCTCA  
GCCTATATACCGCCATCTTCAGCAAACCCTGATGAAGGCT  
ACAAAGTAAGCGCAAGTACCCACGTAAGACGTTAGGTCAAGGTGTAGCCCATGAGGTGGCAAGAAATGGGCTACATTTT  
CTACCCAGAAAACCTACGATAGCCCTTATGAACTTAAGG  
GTCGAAGGTGGATTTAGCAGTAAACTGAGAGTAGAGTGCTTAGTTGAACAGGGCCCTGAAGCGGTACACACCCGCCGTC  
ACCCTCCTCAAGTATACTTCAAAGGACATTTAACTAAAAC  
CCCTACGATTTATATAGAGGAGACAAGTCGTAACATGGTAAGTGTACTGGAAAGTGCCTTGGACGAACCAGAGTGTAG  
CTTAACACAAAGCACCCAACCTTACACTTAGGAGATTTCAA  
CTTAACCTTGACCGCTCTGAGCTAAACCTAGCCCCAAACCCACTCCACCTTACTACCAGACAACCTTAGCCAAACCATTTA  
CCCCAAATAAAGTATAGGCGATAGAAATTGAAACCTGGCGC  
AATAGATATAGTACCGCAAGGGAAAGATGAAAAATTATAACCAAGCATAATATAGCAAGGACTAACCCCTATACCTTCTG  
CATAATGAATTAACCTAGAAATAACTTTGCAAGGAGAGCCA  
AAGCTAAGACCCCGAAACCAGACGAGCTACCTAAGAACAGCTAAAAGAGCACACCCGTCTATGTAGCAAAATAGTGGGA  
AGATTTATAGGTAGAGGCGACAAACCTACCGAGCCTGGTG

ATAGCTGGTTGTCCAAGATAGAATCTTAGTTCAACTTTAAATTTGCCACAGAACCCTCTAAATCCCCTTGTAATTTAA  
CTGTTAGTCCAAAGAGGAACAGCTCTTTGGACACTAGGAA  
AAAACCTTGTAGAGAGAGTAAAAAA-  
TTTAACACCCATAGTAGGCCTAAAAGCAGCCACCAATTAAGAAAGCGTTCAAGCTCAACACCCACTACCTAAAAAA-  
TCCCAAACATATAACTG  
AACTCCTCACACCCAATTGGACCAATCTATCACCCCTATAGAAGAATAATGTTAGTATAAGTAACATGAAAACATTCTCC  
TCCGCATAAGCCTGCGTCAGATTAACCACTGAACTGACA  
ATTAACAGCCCAATATCTACAATCAACCAACAAGTCATTATTACCCTCACTGTCAACCCAACACAGGCATGCTCATAAGG  
AAAGGTTAAAAAAGTAAAAGGAACTCGGCAAATCTTACC  
CCGCCTGTTTACCAAAAACATCACCTCTAGCATCACCGATTAGAGGCACCGCTGCCAGTGACACATGTTTAAACGGC  
CGCGGTACCCCTAACCGTGCAAAGGTAGCATAATCACTTGT  
TCCTTAAATAGGGACCTGTATGAATGGCTCCACGAGGGTTAGCTGTCTCTTACTTTTAAACAGTGAAATTGACCTGCC  
GTGAAGAGGCGGGCATGACACAGCAAGACGAGAAGACCCCT  
ATGGAGCTTTAATTTATTAATGCAAACAGTACCTAACAAACCCACAGGTCCTAAACTACCAAACCTGCATTAATAATTTT  
GGTTGGGGCGACCTCGGAGCAGAACCAACCTCCGAGCAG  
TACATGCTAAGACTTCACCAGTCAAAGCGAACTACTATACTCAATTGATCCAATAACTTGACCAACGGAACAAGTTACCC  
TAGGGATAACAGCGCAATCCTATTCTAGAGTCCATATCAA  
CAATAGGGTTTACGACCTCGATGTTGGATCAGGACATCCCAATGGTGCAGCCGCTATTAAAGGTTTCGTTTGTTCACCGAT  
TAAAGTCTACGTGATCTGAGTTCAGACCGGAGTAATCCA  
GGTCGGTTTCTATCTACTTCAAATTCCTCCCTGTACGAAAGGACAAGAGAAATAAGGCCTACTTCACAAAGCGCCTTCCC  
CCGTAAATGATATCATCTCAACTTAGTATTATACCCACAC  
CCACCCAAGAACAGGGTTTGTAAAGATGGCAGAGCCCGGTAATCGCATAAACTTAAACTTTACAGTCAGAGGTTCAAT  
TCCTCTTCTTAAACAACATACCCATGACCAACCTCCTACTC  
CTCATTGTACCCATTCTAATCGCAATGGCATTCCCTAATGCTTACCGAACGAAAAATTCTAGGCTATATACAACTACGCAA  
AGGCCCAACGTTGTAGGCCCTACGGGCTACTACAACCC  
TTCGCTGACGCCATAAACTCTTACCAAAGAGCCCTAAAACCCGCCACATCTACCATCACCCCTCTACATCACCGCCCC  
GACCTTAGCTCTCACCATCGCTCTTCTACTATGAACCCCC  
CTCCCCATACCAACCCCTGGTCAACCTCAACCTAGGCCCTCTATTTATTCTAGCCACCTCTAGCCTAGCCGTTTACTC  
AATCCTCTGATCAGGGTGAGCATCAAACCTCAAACCTACGCC  
CTGATCGGCGCACTGCGAGCAGTACCCCAAACAATCTCATATGAAGTCACCCTAGCCATCATTCTACTATCAACATTACT  
AATAAGTGGCTCCTTTAACCTCTCCACCCTTATCACAACA  
CAAGAACACCTCTGATTACTCCTGCCATCATGACCCTTGGCCATAATATGATTTATCTCCACACTAGCAGAGACCAACCG  
AACCCCTTCGACCTTGCCGAAGGGGAGTCCGAACCTAGTC  
TCAGGCTTCAACATCGAATACGCCGAGGCCCTTCGCCCTATTCTTCATAGCCGAATACACAAACATTATTATAATAAA  
CACCCCTCACCACTACAATCTTCTAGGAACAACATATGAC  
GCACTCTCCCCTGAACTCTACACAACATATTTTGTACCAAGACCCTACTTCTAACCTCCCTGTTCTTATGAATTCGAAC  
AGCATAACCCCGATTCCGCTACGACCAACTCATAACCTC  
CTATGAAAAAATTCCTACCCTCACCCCTAGCATTACTTATATGATATGTCTCCATACCCATTACAATCTCCAGCATTCC  
CCCTCAAACCTAAGAAATATGTCTGATAAAAGAGTTACTT  
TGATAGAGTAAATAATAGGAGCTTAAACCCCTTATTTCTAGGACTATGAGAATCGAACCCATCCCTGAGAATCCAAAAT  
TCTCCGTGCCACCTATCACACCCCATCCTAAAGTAAGGTC  
AGCTAAATAAGCTATCGGGCCCATACCCCGAAAATGTTGGTTATACCCTTCCCGTACTAATTAATCCCCTGGCCCAACCC  
GTCATCTACTCTACCATCTTTGCAGGCACACTCATCACAG  
CGCTAAGCTCGCACTGATTTTTTACCTGAGTAGGCCTAGAAATAAACATGCTAGCTTTTTATTCCAGTTCTAACCAAAAA  
ATAAACCCCTCGTTCCACAGAAGCTGCCATCAAGTATTTCC  
TCACGCAAGCAACCGCATCCATAATCCTTCTAATAGCTATCCTCTTCAACAATATACTCTCCGGACAATGAACCATAACC  
AATACTACCAATCAATACTCATCATTAAATAATCATAATGG  
CTATAGCAATAAACTAGGAATAGCCCCCTTTCCTTCTGAGTCCCAGAGGTTACCCAAGGCACCCCTCTGACATCCGGC  
CTGCTTCTTCTCACATGACAAAACTAGCCCCTATCTCAA  
TCATATACCAAATCTCTCCCTCACTAAACGTAAGCCTTCTCCTCACTCTCTCAATCTTATCCATCATAGCAGGCAGTTGA  
GGTGGATTAAACCAAACCCAGCTACGCAAAATCTTAGCAT  
ACTCCTCAATTACCCACATAGGATGAATAATAGCAGTTCTACCGTACAACCCCTAACATAACCATTCTTAATTTAACTATT  
TATATTATCCTAACTACTACCGCATTCTACTACTCAACT  
TAAACTCCAGCACCACGACCCTACTACTATCTCGCACCTGAAACAAGATAACATGACTAACACCCCTTAATTCATCCACC  
CTCCTCTCCCTAGGAGGCCTGCCCCGCTAACCGGCTTTT  
TGCCCAAATGGGCCATTATCGAAGAATTCACAAAAACAATAGCCTCATCATCCCCACCATCATAGCCACCATCACCCCTC  
CTTAACCTCTACTTCTACCTACGCCTAATCTACTCCACCT

CAATCACACTACTCCCCATATCTAACAAACGTAAAAATAAAATGACAGTTTGAACATACAAAACCCACCCCATTCCTCCCC  
ACACTCATCGCCCTTACCACGCTACTCCTACCTATCTCCC  
CTTTTATACTAATAATCTTATAGAAATTTAGGTTAAATACAGACCAAGAGCCTTCAAAGCCCTCAGTAAGTTGCAATACT  
TAATTTCTGTAACAGCTAAGGACTGCAAAAACCCCACTCTG  
CATCAACTGAACGCAAATCAGCCACTTTAATTAAGCTAAGCCCTTACTAGACCAATGGGACTTAAACCCACAAAACACTTA  
GTTAACAGCTAAGCACCTAATCAACTGGCTTCAATCTAC  
TTCTCCC GCCCGGGAAAAAGGCGGGAGAAGCCCCGGCAGGTTTGAAGCTGCTTCTTCGAATTTGCAATTCAATATGA  
AAATCACCTCGGAGCTGGTAAAAAGAGGCCTAACCCCTGT  
CTTTAGATTTACAGTCCAATGCTTCACTCAGCCATTTTACCTCACCCCC-  
ACTGATGTTCCGCCGACCGTTGACTATTCTCTACAAACCAAAAGACATTGGAACACTATACTATTATTC  
GGCGCATGAGCTGGAGTCTTAGGCACAGCTCTAAGCCCTCCTTATTTCGAGCCGAGCTGGGCCAGCCAGGCAACCTTCTAGG  
TAACGACCACATCTACAACGTTATCGTACAGCCCATGCA  
TTTGTAATAATCTTCTTCATAGTAATACCCATCATAATCGGAGGCTTTGGCAACTGACTAGTTCCCCTAATAATCGGTGC  
CCCCGATATGGCGTTTTCCCGCATAAACAACATAAGCTTC  
TGACTCTTACCTCCCTCTCTCCTACTCCTGCTCGCATCTGCTATAGTGGAGGCCGGAGCAGGAACAGGTTGAACAGTCTA  
CCCTCCCTTAGCAGGGAACACTCCACCCCTGGAGCCTCC  
GTAGACCTAACCATCTTCTCCTTACACCTAGCAGGTGTCTCCTCTATCTTAGGGGCCATCAATTTTCATCACAACAATTAT  
CAATATAAAAACCCCTGCCATAACCCAATACCAAACGCC  
CTCTTCGTCTGATCCGTCTAATCACAGCAGTCTACTTCTCCTATCTCTCCAGTCTTAGCTGCTGGCATCACTATACT  
ACTAACAGACCGCAACCTCAACACCACCTTCTTCGACCCC  
GCCGGAGGAGGAGACCCATTCTATACCAACACCTATTCTGATTTTTTCGGTCACCCTGAAGTTTATATTCTTATCCTACC  
AGGCTTCGGAATAATCTCCCATATTGTAACCTACTACTCC  
GGAAAAAAGAACCATTTGGATACATAGGTATGGTCTGAGCTATGATATCAATTGGCTTCCCTAGGGTTTATCGTGTGAGC  
ACACCATATATTTACAGTAGGAATAGACGTAGACACACGA  
GCATATTTACCTCCGCTACCATAATCATCGCTATCCCCACCGCGTCAAAGTATTTAGCTGACTCGCCACACTCCACGG  
AAGCAATATGAAATGATCTGCTGCAGTGTCTGAGCCCTA  
GGATTCATCTTTCTTTTACCAGTAGGTGGCCTGACTGGCATTGTATTAGCAAACCTCATCACTAGACATCGTACTACACGA  
CACGTACTACGTTGTAGCTCACTTCCACTATGTCTATCA  
ATAGGAGCTGATTTGCCATCATAGGAGGCTTCATTCACTGATTTCCCTATTCTCAGGCTACACCCTAGACCAAACCTA  
CGCCAAAATCCATTTCACTATCATATTTATCGGCGTAAAT  
CTAACTTTCTTCCCAACACTTTCTCGGCCTATCCGGAATGCCCCGACGTTACTCGGACTACCCCGATGCATACACCAC  
ATGAAACATCCTATCATCTGTAGGCTCATTCAATTTCTCTA  
ACAGCAGTAATATTAATAATTTTTCATGATTTGAGAAGCCTTCGCTTCGAAGCGAAAAGTCTAATAGTAGAAGAACCCTC  
CATAAACCTGGAGTGACTATATGGATGCCCCCGCCCTAC  
CACACATTCGAAGAACCCGTATACATAAAAATCTAGACAAAAAGGAAGGAATCGAACCCCCCAAAGCTGGTTTTCAAGCCA  
ACCTCATGGCCTCCATGACTTTTTTCAAAAAGGTATTAGAA  
AAACCATTTATAACTTTGTCAAAGTTAAATTATAGGCTAAATCCTATATATCTTAATGGCACATGCAGCGCAAGTAGGT  
CTACAAGACGCTACTTCCCCTATCATAGAAGAGCTTATCA  
CCTTTTCATGATCACGCCCTCATAATCATTTTCTTATCTGCTTCCCTAGTCTGTATGCCCTTTTCTTAACACTCACAACA  
AAACTAACTAATACTAACATCTCAGACGCTCAGGAAATAG  
AAACCGTCTGAACTATCCTGCCCGCCATCATCCTAGTCTCATCGCCCTCCCATCCCTACGCATCCTTTACATAACAGAC  
GAGGTCAACGATCCCTCCCTTACCATCAAATCAATTGGCC  
ACCAATGGTACTGAACCTACGAGTACACCGACTACGGCGGACTAATCTTCAACTCCTACATACTTCCCCATTATTCTTA  
GAACCAGGCGACCTGCGACTCCTTGACGTTGACAATCGAG  
TAGTACTCCCGATTGAAGCCCCCATTCTGTATAATAATTACATCACAAGACGTCTTGCACCTCATGAGCTGTCCCCACATTA  
GGCTTAAAAACAGATGCAATTTCCCGGACGTCTAAACAAA  
CCACTTTTACCCTACACGACCGGGGTATACTACGGTCAATGCTCTGAAATCTGTGGAGCAAACCACAGTTTTTCATGCC  
ATCGTCTAGAATTAATTTCCCTAAAAATCTTTGAAATAG  
GGCCCGTATTTACCCTATAGCACCCCTCTACCCCTCTAGAGCCCACTGTAAAGCTAACTTAGCATTAACTTTTAAAGT  
TAAAGATTAAGAGAACCAACACCTCTTTACAGTGAAATGC  
CCCAACTAAATACTACCGTATGGCCACCATAATTACCCCATATTCTTACACTATTCTCATACCCCAACTAAAAATA  
TTAAACACAAACTACCACCTACCTCCCTACCAAAGCCCA  
TAAAAATAAAAAATTATAACAAACCCTGAGAACCAAAATGAACGAAAATCTGTTGCTTTCATTATTGCCCCACAATCC  
TAGGCCTACCCGCCGAGTACTGATCATTCTATTTCCCC  
TCTATTGATCCCCACCTCCAAATATCTCATCAACAACCGACTAATCACCACCAACAATGACTAATCAAACCTAACCTCAA  
AACAAATGATAGCTATACACAACACTAAAGGACGAACCTG

ATCTCTTATACTAGTATCCTTAATCATTFFFFATTGCCACAACCTAACCTCCTCGGACTCCTGCCTCACTCATTACACCAA  
CCACCCAACCTATCTATAAACCTAGCCATGGCCATCCCCTT  
ATGAGCGGGCGCAGTGATTATAGGCTTTTCGCTCTAAGATTAAAAATGCCCTAGCCCACTTCTTACCACAAGGCACACCTA  
CACCCCTTATCCCCATACTAGTTATTATCGAAACCATCAG  
CCTACTCATTCAACCAATAGCCCTGGCCGTACGCCTAACCGCTAACATTACTGCAGGCCACCTACTCATGCACCTAATTG  
GAAGCGCCACCCTAGCAATATCAACCATTAACCTTCCCTC  
TACACTTATCATCTTACAATTCTAATTCTACTGACTATCCTAGAAATCGCTGTGCGCTTAATCCAAGCCTACGTTTTCA  
CACTTCTAGTAAGCCTCTACCTGCACGACAACACATAATG  
ACCCACCAATCACATGCCTATCATATAGTAAAACCCAGCCCATGACCCCTAACAGGGGCCCTCTCAGCCCTCCTAATGAC  
CTCCGGCCTAGCCATGTGATTTCACTTCCACTCCATAACG  
CTCCTCATACTAGGCCTACTAACCAACACACTAACCATATACCAATGATGGCGCGATGTAACACGAGAAAGCACATACCA  
AGGCCAACACACACCACCTGTCCAAAAAGGCCTTCGATAC  
GGGATAATCCTATTTTATTACCTCAGAAGTTTTTTTTCTTCGAGGATTTTTCTGAGCCTTTTACCCTCCAGCCTAGCCCC  
TACCCCTCAACTAGGAGGGCACTGGCCCCAACAGGCATC  
ACCCCGCTAAATCCCCTAGAAGTCCCCTCCTAAACACATCCGTATTACTCGCATCAGGAGTATCAATCACCTGAGCTCA  
CCATAGTCTAATAGAAAGCAACCGAAACCAAATAATTCAA  
GCACTGCTTATTACAATTTTACTGGGTCTCTATTTTACCCTCCTACAAGCCTCAGAGTACTTTCGAGTCTCCCTTACCAT  
TTCCGACGGCATCTACGGCTCAACATTTTTTTGTAGCCACA  
GGCTTCCACGGACTTTCAGTCAATTATTGGCTCAACTTTTCTCCTACTATCTGCTTCATCCGCCAACTAATATTTCACTTTAC  
ATCCAAACATCACTTTGGCTTTCGAAGCCGCCGCTGATAC  
TGGCATTGTTGTAGATGTGGTTTACTATTTCTGTATGTCTCCATCTATTGATGAGGGTCTTACTCTTTTTAGTATAAATAG  
TACCGTTAACTTCCAATTAAGTATTTTGGACAACATTCAA  
AAAAGAGTAATAAACTTCGCCTTAATTTTTAATAATCAACACCCTCCTAGCCTTACTACTAATAATTATTACATTTTACT  
ACCACAACCTCAACGGCTACATAGAAAAATCCACCCCTTAC  
GAGTGCAGGCTTCGACCCTATATCCCCCGCCCGCTCCCTTTCTCCATAAAATTCTTCTTAGTAGCTATTACCTTCTTATT  
ATTTGATCTAGAAATTGCCCTCCTTTTTACCCCTACCATGA  
GCCCTACAAACAACCTAACCTGCCACTAATAGTTATGTCATCCCTCTTATTAATCATCATCCTAGCCCTAAGTCTGGCCTA  
TGAGTGACTACAAAAAGGATTAGACTGAGCTGAATTGGTA  
TATAGTTTTAAACAAAACGAATGATTTTCGACTCATTAAATTATGATAATCATATTTACCAAATGCCCTCATTACATAAA  
TATTATACTAGCATTACCATCTCACTTCTAGGAATACTA  
GTATATCGCTCACACCTCATATCCTCCCTACTATGCCTAGAAGGAATAATACTATCGCTGTTTATTATAGCTACTCTCAT  
AACCCCTCAACACCCACTCCCTCTTAGCCAATATTGTGCCT  
ATTGCCATACTAGTCTTTGCGCCTGCGAAGCAGCGGTGGGCCTAGCCCTACTAGTCTCAATCTCCAACACATATGGCCT  
AGACTACGTACATAACCTAACCTACTCCAATGCTAAAAC  
TAATCGTCCCAACAATTATATTACTACCCTGACATGACTTTCCAAAAAACACATAATTTGAATCAACACAACCACCCAC  
AGCCTAATTATTAGCATCATCCCCCTACTATTTTTTAAAC  
AAATCAACAACAACCTATTTAGCTGTTCCCAACCTTTTTCTCCGACCCCTAACACCCCTCCTAATACTAACTACC  
TGACTCCTACCCCTCACAAATCATGGCAAGCCAACGCCACT  
TATCCAGTGAACCACTATCACGAAAAAACTCTACCTCTCTATACTAATCTCCCTACAAATCTCCTTAATTATAACATTC  
ACAGCCACAGAATAATCATATTTTATATCTTCTTCGAAA  
CCACACTTATCCCCACCTTGGCTATCATACCCGATGAGGCAACCAGCCAGAACGCCTGAACGCAGGCACATACTTCCCTA  
TTCTATACCCTAGTAGGCTCCCTTCCCCTACTCATCGCAC  
TAATTTACTACTACAACACCCTAGGCTCACTAAACATTCTACTACTACTCTACTGCCCCAAGAACTATCAAACCTCCTGA  
GCCAACAACCTAATATGACTAGCTTACACAATAGCTTTTTA  
TAGTAAAGATACCTCTTTACGGACTCCACTTATGACTCCCTAAAGCCCATGTGGAAGCCCCATCGCTGGGTCAATAGTA  
CTTGCCGCAGTACTCTTAAAACCTAGGCGGCTATGGTATAA  
TACGCCTCACACTCATTCTCAACCCCTGACAAAAACACATAGCCTACCCCTTCTTGTACTATCCCTATGAGGCATAATT  
ATAACAAGCTCCATCTGCCTACGACAAAACAGACCTAAAAT  
CGCTCATTGCATACTCTTCAATCAGCCACATAGCCCTCGTAGTAACAGCCATTCTCATCCAAACCCCTGAAGCTTACC  
GGCGCAGTCACTTCTATAATCGCCCACGGACTTACATCCT  
CATTACTATTCTGCCTAGCAAACCTCAAACCTACGAACGCCTCACAGTCGCATCATAATCCTCTCTCAAGGACTTCAAACCT  
CTACTCCCACTAATAGCTTTTTTGTAGACTTCTAGCAAGCC  
TCGCTAACCTCGCCTTACCCCCACTATTAACCTACTGGGAGAAGTCTCTGTGCTAGTAACCACGTTCTCCTGATCAAAT  
ATCACTCTCCTACTTACAGGACTCAACATGCTAGTCACAG  
CCCTATACTCCCTCTACATATTTACCACAACACAATGGGGCTCACTCACCCACCACATTAACAACATAAAACCCCTCATTC  
ACACGAGAAAACACCCTCATGTTTATACACCTATCCCCCA

TTCTCCTCCTATCCCTCAACCCCGACATCATTACCGGGTTTTCTCTTGTAATATAGTTTAAACAAAACATCAGATTGT  
GAATCTGACAACAGAGGCTTACGACCCCTTATTTACCGAG  
AAAGCTCACAAGAAGTCTAACTCATGCCCCATGTCTAACAACATGGCTTTCTCAACTTTTAAAGGATAACAGCTATCC  
ATTGGTCTTAGGCCCAAAAATTTTGGTGCAACTCCAAAT  
AAAAGTAATAACCATGCACACTACTATAACCACCCTAACCTGACTTCCCTAATTCCCCCATCCTTACCACCCTCGTTA  
ACCCTAACAAAAAACTCATACCCCATTTATGTAAAATC  
CATTGTGCGATCCACCTTTATTATCAGTCTCTTCCCCACAACAATATTCATGTGCCTAGACCAAGAAGTTATTATCTCGA  
ACTGACACTGAGCCACAACCCAAACAACCCAGCTCTCCCT  
AAGCTTCAAACCTAGACTACTTCTCCATAATATTCATCCCTGTAGCATTGTTTCGTTACATGGTCCATCATAGAATTCTCAC  
TGTGATATATAAACTCAGACCCAAACATTAATCAGTTCTT  
CAAATATCTACTCATTTTTCTAATTACCATACTAATCTTAGTTACCGCTAACAACCTATTCCAACCTGTTTCATCGGCTGAG  
AGGGCGTAGGAATTATATCTTTCTTGCTCATCAGTTGATG  
ATACGCCCCGAGCAGATGCCAACACAGCAGCCATTCAAGCAATCCTATACAACCGTATCGGCGATATCGGTTTCATCCTCG  
CCTTAGCATGATTTATCCTACACTCCAACCTCATGAGACCC  
ACAACAAATAGCCCTTCTAAACGCTAATCCAAGCCTCACCCACTACTAGGCCTCCTCCTAGCAGCAGCAGGCAAATCAG  
CCCAATTAGGTCTCCACCCCTGACTCCCTCAGCCATAGA  
AGGCCCCACCCAGTCTCAGCCCTACTCCACTCAAGCACTATAGTTGTAGCAGGAATCTTCTTACTCATCCGCTTCCACC  
CCCTAGCAGAAAATAGCCCACTAATCCAACTCTAACACT  
ATGCTTAGGCGCTATCACCCTCTGTTTCGAGCAGTCTGCGCCCTTACACAAAATGACATCAAAAAATCGTAGCCTTCT  
CCACTTCAAGTCAACTAGGACTCATAATAGTTACAATCGG  
CATCAACCAACCACACCTAGCATTCTGCACATCTGTACCCACGCCTTCTTCAAAGCCATACTATTTATGTGCTCCGGGT  
CCATCATCCACAACCTTAACAATGAACAAGATATTCGAAA  
AATAGGAGGACTACTCAAACCATACCTCTCACTTCAACCTCCCTCACCATTTGGCAGCCTAGCATTAGCAGGAATACCTT  
TCCTCACAGGTTTTCTACTCCAAAGACCACATCATCGAAAC  
CGCAACATATCATAACAAACGCCTGAGCCCTATCTATTACTCTCATCGCTACCTCCCTGACAAGCGCCTATAGCACTC  
GAATAATTCTTCTCACCTAACAGGTCAACCTCGCTTCCC  
CACCTTACTAACATTAACGAAAATAACCCACCCCTACTAAACCCATTAAACGCCTGGCAGCCGGAAGCCTATTTCGAG  
GATTTCTCATTACTAACAAACATTTCCCCCGCATCCCCCT  
CCAAACAACAATCCCCCTCTACCTAAAACCTCACAGCCCTCGCTGTCACTTTCTTAGGACTTCTAACAGCCCTAGACCTCA  
ACTACCTAACCAACAACCTTAAAATAAAATCCCCACTATG  
CACATTTTATTTCTCAAACATACTCGGATTCTACCCTAGCATCACACACCCGCACAATCCCCTATCTAGGCCTTCTTACGA  
GCCAAAACCTGCCCCCTACTCCTCCTAGACCTAACCTGACT  
AGAAAAGCTATTACCTAAAACAATTTACAGCACCAAATCTCCACCTCCATCATCACCTCAACCCAAAAAGGCATAATTA  
AACTTTACTTCTCTCTTTCTTCTTCCACTCATCCTAAC  
CCTACTCCTAATCACATAACCTATTCCCCCGAGCAATCTCAATTACAATATATACACCAACAACAATGTTCAACCAGTA  
ACTACTACTAATCAACGCCATAATCATACAAAGCCCCCG  
CACCAATAGGATCCTCCCGAATCAACCCTGACCCCTCTCCTTCATAAATTATTAGCTTCTTACACTATTAAGTTTACC  
ACAACCACCACCCCATCATACTCTTTACCCACAGCACCA  
ATCCTACCTCCATCGCTAACCCCACTAAAACACTCACCAAGACCTCAACCCCTGACCCCATGCCTCAGGATACTCCTCA  
ATAGCCATCGCTGTAGTATATCCAAAGACAACCATCATTC  
CCCCTAAATAAATTAATAAACTATTAACCCATATAACCTCCCCAAAATTCAGAATAATAACACACCCGACCACACCG  
CTAACAAATCAATACTAAACCCCATAAATAGGAGAAGGCT  
TAGAAGAAAACCCCAAAACCCCATTAATAACCCCACTCAACAGAAAACAAGCATATATCATTATTCTCGCACGGACT  
ACAACCACGACCAATGATATGAAAAACCATCGTTGTATTT  
CAACTACAAGAACAACCAATGACCCCAATACGCAAAATTAACCCCTAATAAACTAATTAACCACTCATTTCATCGACCTC  
CCCACCCCATCAAACATCTCCGCATGATGAACTTCGGCT  
CACTCCTTGGCGCCTGCCTGATCCTCAAATCACACAGGACTATTCTAGCCATGCACTACTCACAGACGCCTCAACC  
GCCTTTTCATCAATCGCCACATCACTCGAGACGTAAATT  
ATGGCTGAATCATCCGCTACCTTACGCAATGGCGCCTCAATATTCTTTATCTGCCTCTTCTACACATCGGACGAGGC  
CTATATTACGGATCATTTCTCTACTCAGAAACCTGAAACA  
TCGGCATTATCCTCCTGCTTGCAACTATAGCAACAGCCTTCATAGGCTATGTCTCCCGTGAGGCCAAATATCATTCTGA  
GGGGCCACAGTAATTACAACTTACTATCCGCCATCCCAT  
ACATTGGGACAGACCTAGTTCAATGAATCTGAGGAGGCTACTCAGTAGACAGTCCCACCCTCACACGATTCTTTACCTTT  
CACTTCATCTTACCCTTCATTATTGCAGCCCTAGCAGCAC  
TCCACCTCCTATTCTTGACGAAACGGGATCAAACAACCCCTAGGAATCACCTCCCATTCCGATAAAATCACCTTCCAC  
CCTTACTACACAATCAAAGACGCCCTCGGCTTACTTCTCT

TCCTTCTCTCCTTAATGACATTAACACTATTCTCACCAGACCTCCTAGGCGACCCAGACAATTATACCCCTAGCCAACCCC  
TTAAACACCCCTCCCCACATCAAGCCCGAATGATATTTCC  
TATTTCGCCTACACAATTCTCCGATCCGTCCCTAACAACTAGGAGGCGTCTTGCCTATTACTATCCATCCTCATCCTA  
GCAATAATCCCCATCCTCCATATATCCAAACAACAAAGCA  
TAATATTTTCGCCACTAAGCCAATCACTTTATTGACTCCTAGCCGAGACCTCCTCATTCTAACCTGAATCGGAGGACAA  
CCAGTAAGCTACCCTTTTACCATCATTGGACAAGTAGCAT  
CCGTACTATACTTCAACAATCCTAATCCTAATACCAACTATCTCCCTAATTGAAAACAAAATACTCAAATGGGCCTGT  
CCTTGTAGTATAAACTAATACACCAGTCTTGTAAACCGGA  
GATGAAAACCTTTTTTCCAAGGACAAATCAGAGAAAAAGTCTTTAACTCCACCATTAGCACCCAAAGCTAAGATTCTAATT  
TAAACTATT

#ASIA Japanese

CCACAGTTTTATGTAGCTTACCTCCTCAAAGCAATACACTGAAAATGTTTAGACGGGCTCACATCACCCCATAAACAAATA  
GGTTTGGTCTAGCCTTTCTATTAGCTCTTAGTAAGATTA  
CACATGCAAGCATCCCCGTTCCAGTGAGTTCACCCTCTAAATCACCACGATCAAAAGGGACAAGCATCAAGCACGCAGCA  
ATGCAGCTCAAAACGCTTAGCCTAGCCACACCCCCACGGG  
AAACAGCAGTGATTAACCTTTAGCAATAAACGAAAGTTTAACTAAGCTATACTAACCCAGGGTTGGTCAATTTTCGTGCC  
AGCCACCGCGGTACACAGATTAACCCAAGTCAATAGAAGC  
CGGCGTAAAGAGTGTTTTAGATCACCCCTCCCCAATAAAGCTAAAACCTCACCTGAGTTGTAAAAAACTCCAGTTGACAC  
AAAATAGACTACGAAAGTGGCTTTAACATATCTGAACACA  
CAATAGCTAAGACCCAAACTGGGATTAGATACCCCACTATGCTTAGCCCTAAACCTCAACAGTTAAATCAACAAAACCTGC  
TCGCCAGAACACTACGAGCCACAGCTTAAAACCTCAAAGGA  
CCTGGCGGTGCTTCATATCCCTCTAGAGGAGCCTGTTCTGTAATCGATAAACCCCGATCAACCTCACCCCTCTTGCTCA  
GCCTATATACCGCCATCTTCAGCAAACCTGATGAAGGCT  
ACAAAGTAAGCGCAAGTACCCACGTAAAGACGTTAGGTCAAGGTGTAGCCCATGAGGTGGCAAGAAATGGGCTACATTTT  
CTACCCAGACAACACTACGATAGCCCTTATGAAACTTAAGG  
GTCGAAGGTGGATTTAGCAGTAAACTGAGAGTAGAGTGCTTAGTTGAACAGGGCCCTGAAGCGGTACACACCGCCCGTC  
ACCCTCCTCAAGTATACTTCAAAGGACATTTAACTAAAAC  
CCCTACGCATTTATATAGAGGAGACAAGTCGTAACATGGTAAGTGTACTGGAAAGTGCCTTGGACGAACCAGAGTGTAG  
CTTAACACAAAGCACCCAACCTTACACTTAGGAGATTTCAA  
CTTAACTTGACCGCTCTGAGCTAAACCTAGCCCCAAACCCACTCCACCTTACTACCAGACAACCTTAGCCAAACCATTTA  
CCCCAATAAAGTATAGGCGATAGAAATTGAAACCTGGCGC  
AATAGATATAGTACCGCAAGGGAAAGATGAAAAATTATAACCAAGCATAATATAGCAAGGACTAACCCCTATACCTTCTG  
CATAATGAATTAAGTAACTAGAAATAACTTTGCAAGGAGAGCCA  
AAGCTAAGACCCCCGAAACCAGACGAGCTACCTAAGAACAGCTAAAAGAGCACACCCCGTCTATGTAGCAAAATAGTGGGA  
AGATTTATAGGTAGAGGCGACAAACCTACCGAGCCTGGTG  
ATAGCTGGTTGTCCAAGATAGAATCTTAGTTCAACTTTAAATTTGCCACAGAACCCTCTAAATCCCCTTGTAATTTAA  
CTGTTAGTCCAAGAGGAACAGCTCTTTGGACACTAGGAA  
AAAACCTTGTAGAGAGAGTAAAAAA-  
TTTTAACCCCATAGTAGGCCTAAAAGCAGCCACCAATTAAGAAAGCGTTCAAGCTCAACACCCACTACCTAAAAAA-  
TCCCAAACATATAACTG  
AACTCCTCACACCCAATTGGACCAATCTATCACCCCTATAGAAGAACTAATGTTAGTATAAGTAACATGAAAACATTCTCC  
TCCGCATAAGCCTGCGTCAGATTAACCACTGAACTGACA  
ATTAACAGCCCAATATCTACAATCAACCAACAAGTCATTATTACCCTCACTGTCAACCCAACACAGGCATGCTCATAAGG  
AAAGGTTAAAAAAGTAAAAGGAACTCGGCAAATCTTACC  
CCGCCTGTTTACCAAAAACATCACCTCTAGCATCACAGTATTAGAGGCACCGCTGCCAGTGACACATGTTTAAACGGC  
CGCGGTACCCTAACCGTGCAAAGGTAGCATAATCACTTGT  
TCCTTAAATAGGGACCTGTATGAATGGCTCCACGAGGGTTAGCTGTCTCTTACTTTTAAACAGTGAAATTGACCTGCC  
GTGAAGAGGCGGCATGACACAGCAAGACGAGAAGACCTT  
ATGGAGCTTTAATTTATTAATGCAAACAGTACCTAACAAACCCACAGGTCCTAACTACCAAACCTGCATTAATAAATTT  
GGTTGGGGCGACCTCGGAGCAGAACCCAACCTCCGAGCAG  
TACATGCTAAGACTTCACCAGTCAAAGCGAACTACTATACTCAATTGATCCAATAACTTGACCAACGGAACAAGTTACCC  
TAGGGATAACAGCGCAATCCTATTCTAGAGTCCATATCAA  
CAATAGGGTTTACGACCTCGATGTTGGATCAGGACATCCAATGGTGCAGCCGCTATTAAGGTTTCGTTTGTTCACCGAT  
TAAAGTCTACGTGATCTGAGTTCAGACCGGAGTAATCCA  
GGTCGGTTTTCTATCTACTTCAAATTCCTCCCTGTACGAAAGGACAAGAGAAATAAGGCCTACTTCACAAAGCGCCTTCCC  
CCGTAAATGATATCATCTCAACTTAGTATTATACCCACAC

CCACCCAAGAACAGGGTTTTGTTAAGATGGCAGAGCCCGGTAATCGCATAAAACTTAAAACTTTACAGTCAGAGGTTCAAT  
TCCTCTTCTTAACAACATACCCATGGCCAACCTCCTACTC  
CTCATTGTACCCATTCTAATCGCAATGGCATTCTAATGCTTACCGAACGAAAAATTCTAGGCTATATACAACCTACGCAA  
AGGCCCAACGTTGTAGGCCCTACGGGCTACTACAACCC  
TTGCTGACGCCATAAACTCTTACCACAAAGAGCCCTAAAACCCGCCACATCTACCATCACCCCTCTACATCACCGCCCC  
GACCTTAGCTCTCACCATCGCTCTTCTACTATGAACCCCC  
CTCCCCATACCCAACCCCTGGTCAACCTCAACCTAGGCCTCCTATTTATTCTAGCCACCTCTAGCCTAGCCGTTTACTC  
AATCCTCTGATCAGGGTGAGCATCAAACCTCAAACCTACGCC  
CTGATCGGCGCACTGCGAGCAGTAGCCCAAACAATCTCATATGAAGTCACCCTAGCCATCATTCTACTATCAACATTACT  
AATAAGTGGCTCCTTTAACCTCTCCACCCTTATCACAACA  
CAAGAACACCTCTGATTACTCCTGCCATCATGACCCTTGCCATAATATGATTTATCTCCACACTAGCAGAGACCAACCG  
AACCCCTTCGACCTTGCCGAAGGGGAGTCCGAACCTAGTC  
TCAGGCTTCAACATCGAATACGCCGAGGCCCTTCGCCCTATTCTTCATAGCCGAATACACAAACATTATTATAATAAA  
CACCCCTCACCACTACAATCTTCTAGGAACAACATATGAC  
GCACTCTCCCCTGAACTCTACACAACATATTTTTGTACCACAGACCCTACTTCTAACCTCCCTGTTCTTATGAATTCGAAC  
AGCATACCCCGATTCCGCTACGACCAACTCATAACCTC  
CTATGAAAAAATCTCCTACCCTCACCCCTAGCATTACTTATATGATATGTCTCCATACCCATTACAATCTCCAGCATTCC  
CCCTCAAACCTAAGAAATATGTCTGATAAAAAGAGTTACTT  
TGATAGAGTAAATAATAGGAGCTTAAACCCCTTATTTCTAGGACTATGAGAATCGAACCCATCCCTGAGAATCCAAAAT  
TCTCCGTGCCACCTATCACACCCATCCTAAAGTAAGGTC  
AGCTAAATAAGCTATCGGGCCATACCCCGAAAATGTTGGTTATACCCTTCCCGTACTAATTAATCCCTGGCCCAACCC  
GTCATCTACTCTACCATCTTTGCAGGCACACTCATCACAG  
CGCTAAGCTCGCACTGATTTTTTACCTGAGTAGGCCTAGAAATAAACATGCTAGCTTTTTATTCCAGTTCTAACCAAAAA  
ATAAACCTCGTTCCACAGAAGCTGCCATCAAGTATTTCC  
TCACGCAAGCAACCGCATCCATAATCCTTCTAATAGCTATCCTCTTCAACAATATACTCTCCGGACAATGAACCATAACC  
AATACTACCAATCAATACTCATCATTAATAATCATAATGG  
CTATAGCAATAAACTAGGAATAGCCCCCTTCACTTCTGAGTCCCAGAGGTTACCCAAGGCACCCCTCTGACATCCGGC  
CTGCTTCTTCTCACATGACAAAAACTAGCCCTATCTCAA  
TCATATACCAATCTCTCCCTCACTAAACGTAAGCCTTCTCCTCACTCTCTCAATCTTATCCATCATAGCAGGCAGTTGA  
GGTGGATTAAACCAACCCAGCTACGCAAAATCTTAGCAT  
ACTCCTCAATTACCCACATAGGATGAATAATAGCAGTTCTACCGTACAACCCTAACATAACCATTCTTAATTTAACTATT  
TATATTATCCTAACTACTACCGCATTCTACTACTCAACT  
TAAACTCCAGCACCACGACCCTACTACTATCTCGCACCTGAAACAAGATAACATGACTAACACCCTTAATTCATCCACC  
CTCCTCTCCCTAGGAGGCCTGCCCGCTAACCGGCTTTT  
TGCCCAAATGGGCCATTATCGAAGAATTCACAAAAACAATAGCCTCATCATCCCCACCATCATAGCCACCATCACCCCTC  
CTTAACCTCTACTTCTACCTACGCCTAATCTACTCCACCT  
CAATCACACTACTCCCATATCTAACAACGTAATAATAATAATGACAGTTTGAACATACAAAACCCACCCATTCTCCCC  
ACACTCATCGCCCTTACCACGCTACTCCTACCTATCTCCC  
CTTTTATACTAATAATCTTATAGAAATTTAGGTTAAATACAGACCAAGAGCCTTCAAAGCCCTCAGTAAGTTGCAATACT  
TAATTTCTGTAACAGCTAAGGACTGCAAAACCCACTCTG  
CATCAACTGAACGCAATCAGCCACTTTAATTAAGCTAAGCCCTTACTAGACCAATGGGACTTAAACCCACAAACACTTA  
GTTAACAGCTAAGCACCTAATCAACTGGCTTCAATCTAC  
TTCTCCCGCCGCGGGAAAAAGGCGGGAGAAGCCCGGCAGGTTTGAAGCTGCTTCTTCGAATTTGCAATTCATATGA  
AAATCACCTCGGAGCTGGTAAAAAGAGGCCTAACCCCTGT  
CTTTAGATTTACAGTCCAATGCTTCACTCAGCCATTTTACCTCACCCCC-  
ACTGATGTTGCGCCACCGTTGACTATTCTCTACAAACCACAAAGACATTGGAACACTATACTATTATTTC  
GGCGCATGAGCTGGAGTCTTAGGCACAGCTCTAAGCCTCCTTATTGAGCCGAGCTGGGCCAGCCAGGCAACCTTCTAGG  
TAACGACCACATCTACAACGTTATCGTCACAGCCCATGCA  
TTTGTAATAATCTTCTTCATAGTAATACCCATCATAATCGGAGGCTTTGGCAACTGACTAGTTCCCCTAATAATCGGTGC  
CCCCGATATGGCGTTTTCCCCGCATAAACAACATAAGCTTC  
TGACTCTTACCTCCCTCTCTCCTACTCCTGCTCGCATCTGCTATAGTGGAGGCCGAGCAGGAACAGGTTGAACAGTCTA  
CCCTCCCTTAGCAGGGAACCTACTCCACCCTGGAGCCTCC  
GTAGACCTAACCATCTTCTCCTTACACCTAGCAGGTGTCTCCTCTATCTTAGGGGCCATCAATTTTCATCACAACAATTAT  
CAATATAAAACCCCTGCCATAACCCAATACCAAACGCC  
CTCTTCGTCTGATCCGTCTAATCACAGCAGTCTACTTCTCCTATCTCTCCAGTCTTAGCTGCTGGCATCACTATACT  
ACTAACAGACCGCAACCTCAACACCACCTTCTTCGACCCC

GCCGGAGGAGGAGACCCATTCTATAACCAACACCTATTCTGATTTTTTCGGTCACCCTGAAGTTTATATTCTTATCCTACC  
AGGCTTCGGAATAATCTCCCATATTGTAACCTTACTACTCC  
GGAAAAAAGAACCATTTGGATACATAGGTATGGTCTGAGCTATGATATCAATTGGCTTCCTAGGGTTTATCGTGTGAGC  
ACACCATATATTTACAGTAGGAATAGACGTAGACACACGA  
GCATATTTTACCTCCGCTACCATAATCATCGCTATCCCCACCGGCGTCAAAGTATTTAGCTGACTCGCCACACTCCACGG  
AAGCAATATGAAATGATCTGCTGCAGTGCTCTGAGCCCTA  
GGATTCATCTTTCTTTTACCCTAGGTGGCCTGACTGGCATTGTATTAGCAAACCTCATCACTAGACATCGTACTACACGA  
CACGTACTACGTTGTAGCTCACTTCCACTATGTCCTATCA  
ATAGGAGCTGTATTTGCCATCATAGGAGGCTTCATTCACTGATTTCCCTATTCTCAGGCTACACCCTAGACCAAACCTA  
CGCCAAAATCCATTTCACTATCATATTCATCGGCGTAAAT  
CTAATTTCTTTCCACAACACTTTCTCGGCCTATCCGGAATGCCCCGACGTTACTCGGACTACCCCGATGCATACACCAC  
ATGAAACATCCTATCATCTGTAGGCTCATTCACTTTCTCTA  
ACAGCAGTAATATTAATAATTTTTCATGATTTTGAGAAGCCTTCGCTTCGAAGCGAAAAGTCTAATAGTAGAAGAACCCTC  
CATAAACCTGGAGTGACTATATGGATGCCCCCACCCTAC  
CACACATTCGAAGAACCCGTATAATAAAATCTAGACAAAAAGGAAGGAATCGAACCCCCCAAAGCTGGTTTTCAAGCCA  
ACCCCATGGCCTCCATGACTTTTTCAAAAAGGTATTAGAA  
AAACCATTTCATAACTTTGTCAAAGTTAAATTATAGGCTAAATCCTATATATCTTAATGGCACATGCAGCGCAAGTAGGT  
CTACAAGACGCTACTTCCCCTATCATAGAAGAGCTTATCA  
CCTTTTCATGATCACGCCCTCATAATCATTTTCTTATCTGCTTCCCTAGTCTGTATGCCCTTTTCTAACACTCACAACA  
AAACTAACTAATACTAACATCTCAGACGCTCAGGAAATAG  
AAACCGTCTGAACTATCCTGCCCCCATCATCTAGTCTCATCGCCCTCCCATCCCTACGCATCCTTTACATAACAGAC  
GAGGTCAACGATCCCTCCCTTACCATCAAATCAATTGGCC  
ACCAATGGTACTGAACCTACGAGTACACCGACTACGGCGGACTAATCTTCAACTCCTACATACTTCCCCATTATTCTTA  
GAACCAGGCGACCTGCGACTCCTTGACGTTGACAATCGAG  
TAGTACTCCCAATTGAAGCCCCCATTTCGTATAATAATTACATCACAAGACGTCTTGCCTCATGAGCTGTCCCCACATTA  
GGCTTAAAAACAGATGCAATTCGCGGACGTCTAAACAAA  
CCACTTTACCGCTACACGACCGGGGTATACTACGGTCAATGCTCTGAAATCTGTGGAGCAAACCACAGTTTTCATGCC  
ATCGTCTAGAAATTAATTTCCCTAAAAATCTTTGAAATAG  
GGCCCGTATTTACCCTATAGCACCCCTCTACCCCTCTAGAGCCCACTGTAAAGCTAACTTAGCATTAACTTTTAAAGT  
TAAAGATTAAGAGAACCAACACTCTTTACAGTGAAATGC  
CCCAACTAAATACTACCGTATGGCCACCATAATTACCCCATATTCTTACACTATTCTCATCACCAACTAAAAATA  
TTAAACACAACTACCACCTACCTCCCTCACCAAAGCCCA  
TAAAAATAAAAAATTATAACAAACCCTGAGAACCAAAATGAACGAAAATCTGTTTCGCTTCATTATTGCCCCACAATCC  
TAGGCCTACCCGCGCAGTACTGATCATTCTATTTCCCC  
TCTATTGATCCCCACCTCCAAATATCTCATCAACAACCGACTAATCACCACCAACAATGACTAATCAAACCTAACCTCAA  
AACAAATGATAGCCATACACAACACTAAAGGACGAACCTG  
ATCTCTTATACTAGTATCCTTAATCATTTTTTATTGCCACAACCTCCTCGGACTCCTGCCTCACTCATTTACACCAA  
CCACCAACTATCTATAAACCTAGCCATGGCCATCCCCTT  
ATGAGCGGGCGCAGTGATTATAGGCTTTTCGCTCTAAGATTAATAATGCCCTAGCCCACTTCTTACCACAAGGCACACCTA  
CACCCCTTATCCCATACTAGTTATTATCGAAACTATCAG  
CCTACTCATTCAACCAATAGCCCTGGCCGTACGCCTAACCGCTAACATTACTGCAGGCCACCTACTCATGCACCTAATTG  
GAAGCGCCACCCTAGCAATATCAACCATTAACCTTCCCTC  
TACACTTATCATCTTACAATTCTAATTCTACTGACTATCCTAGAAATCGCTGTGCTTAAATCCAAGCCTACGTTTTCA  
CACTTCTAGTAAGCCTCTACCTGCACGACAACACATAATG  
ACCCACCAATCACATGCCTATCATATAGTAAAACCCAGCCCATGACCCTAACAGGGGCCCTCTCAGCCCTCCTAATGAC  
CTCCGGTCTAGCCATGTGATTTCACTTCCACTCCATAACG  
CTCCTCATACTAGGCCTACTAACCGCACACTAACCATATACCAATGATGGCGGATGTAACACGAGAAAGCACATACCA  
AGGCCACCACACACCACCTGTCCAAAAGGCCTTCGATAC  
GGGATAATCCTATTTTATTACCTCAGAAGTTTTTTTTCTTCGAGGATTTTTCTGAGCCTTTTACCCTCCAGCCTAGCCCC  
TACCCCAACTAGGAGGGCACTGGCCCCAACAGGCATC  
ACCCCGCTAAATCCCCTAGAAGTCCCCTCCTAAACACATCCGTATTACTCGCATCAGGAGTATCAATCACCTGAGCTCA  
CCATAGTCTAATAGAAAACAACCGAAACCAAATAATTCAA  
GCACTGCTTATTACAATTTTACTGGGTCTCTATTTTACCCTCCTACAAGCCTCAGAGTACTTTCGAGTCTCCCTTACCAT  
TTCCGACGGCATCTACGGCTCAACATTTTTTGTAGCCACA  
GGCTTCCACGGACTACACGTCAATTATTGGCTCAACTTTCTCACTATCTGCTTCATCCGCCAACTAATATTTCACTTTAC  
ATCCAAACATCACTTTGGCTTCGAAGCCGCGCCTGATAC

TGGCATTGTTGTAGATGTGGTTTGACTATTTCTGTATGTCTCCATCTATTGATGAGGGTCTTACTCTTTTAGTATAAATAG  
TACCGTTAACTTCCAATTAAGTATTTTGGACAACATTCAA  
AAAAGAGTAATAAACTTCGCCTTAATTTTAATAATCAACACCCTCCTAGCCTTACTACTAATAATTATTACATTTTGACT  
ACCACAACCTCAACGGCTACATAGAAAAATCCACCCCTTAC  
GAGTGC GGCTTCGACCCTATATCCCCCGCCGCGTCCCTTTCTCCATAAAATTCTTCTTAGTAGCTATTACCTTCTTATT  
ATTTGATCTAGAAATTGCCCTCCTTTTACCCCTACCATGA  
GCCCTACAAACAACCTAACCTGCCACTAATAGTTATGTCATCCCTCTTATTAATCATCATCCTAGCCCTAAGTCTGGCCTA  
TGAGTGACTACAAAAAGGATTAGACTGAGCTGAATTGGTA  
TATAGTTTAAACAAAACGAATGATTTGACTCATTAAATTATGATAATCATATTTACCAAATGCCCTCATTACATAAA  
TATTATACTAGCATTACCATCTCACTTCTAGGAATACTA  
GTATATCGCTCACACCTCATATCCTCCCTACTATGCCTAGAAGGAATAATACTATCGCTGTTTATTATAGCTACTCTCAT  
AACCTCAACACCCTCCTCTTAGCCAATATTGTGCCT  
ATTGCCATACTAGTCTTTGCCGCTGCGAAGCAGCGGTGGGCTAGCCCTACTAGTCTCAATCTCCAACACATATGGCCT  
AGACTACGTACATAACCTAAACCTACTCCAATGCTAAAAC  
TAATCGTCCCAACAATTATATTACTACCCTGACATGACTTTCCAAAAACACATAATTTGAATCAACACAACCACCCAC  
AGCCTAATTATTAGCATCATCCCCCTACTATTTTTTAACC  
AAATCAACAACAACCTATTTAGCTGTTCCCAACCTTTTCTCCGACCCCTAACACCCCTCCTAATACTAACTACC  
TGACTCCTACCCCTCACAATCATGGCAAGCCAACGCCACT  
TATCCAGTGAACCACTATCACGAAAAAACTCTACCTCTCTATACTAATCTCCCTACAAATCTCCTTAATTATAACATTC  
ACAGCCACAGAATAATCATATTTTATATCTTCTTCGAAA  
CCACACTTATCCCCACCTTGGCTATCATACCCGATGAGGCAACCAGCCAGAACGCCTGAACGCAGGCACATACTTCTTA  
TTCTACACCCTAGTAGGCTCCCTTCCCCTACTCATCGCAC  
TAATTTACACTCACAACACCCTAGGCTCACTAAACATTCTACTACTCACTCTCACTGCCAAGAACTATCAAACCTCTGA  
GCCAACAACCTAATATGACTAGCTTACACAATAGCTTTTA  
TAGTAAAGATACCTCTTTACGGACTCCACTTATGACTCCCTAAAGCCCATGTGGAAGCCCATCGCTGGGTCAATAGTA  
CTTGCCGCGACTCTTAAACTAGGCGGCTATGGTATAA  
TAGCCTCACACTCATTCTCAACCCCTGACAAAACACATAGCCTACCCCTTCTTGTACTATCCCTATGAGGCATAATT  
ATAACAAGCTCCACTCTGCCTACGACAAAACAGACCTAAAA  
CGCTCATTGCATACTCTTCAATCAGCCACATAGCCCTCGTAGTAACAGCCATTCTCATCCAAACCCCTGAAGCTTACC  
GGCGCAGTCACTCTATAATCGCCACGGACTTACATCCT  
CATTACTATTCTGCCTAGCAAACCTCAAACCTACGAACGCCTCACAGTCGCATCATAATCCTCTCTCAAGGACTTCAAAC  
CTACTCCCCTAATAGCTTTTTGATGACTTCTAGCAAGCC  
TCGCTAACCTCGCCTTACCCCCACTATTAACCTACTGGGAGAACTCTCTGTGCTAGTAACCACGTTCTCCTGATCAAAT  
ATCACTCTCCTACTTACAGGACTCAACATACTAGTCACAG  
CCCTATACTCCCTCTACATATTTACCACAACACAATGGGGCTCACTCACCCACCACATTAACAACATAAAACCCTCATTC  
ACACGAGAAAACACCCTCATGTTTATACACCTATCCCCCA  
TTCTCCTCCTATCCCTCAACCCCGACATCATTACCGGGTTTTCTTGTAAATATAGTTTAAACAAAACATCAGATTGT  
GAATCTGACAACAGAGGCTTACGACCCCTTATTTACCGAG  
AAAGCTCACAAGAAGTCTAATCATGCCCCATGTCTAACAACATGGCTTTCTCAACTTTTAAAGGATAACAGCTATCC  
ATTGGTCTTAGGCCCAAAAATTTTGGTGCAACTCCAAAT  
AAAAGTAATAACCATGCACACTACTATAACCACCCTAACCTGACTTCCCTAATTTCCCCCATCCTTACCACCCTCGTTA  
ACCCTAACAAAAAACTCATACCCCTATTATGTAATC  
CATTGTGCATCCACCTTTATTATCAGTCTTCCCCACAACAATATTCATGTGCCTAGACCAAGAAGTTATTATCTCGA  
ACTGACTGAGCCACAACCCAAACAACCCAGCTCTCCCT  
AAGCTTCAAACCTAGACTACTTCTCCATAATATTCATCCCTGTAGCATTGTTGTTACATGGTCCATCATAGAATTCTCAC  
TGTGATATATAAACTCAGACCCAAACATTAATCAGTTCTT  
CAAATATCTACTATTTTCTAATTACCATACTAATCTTAGTTACCGCTAACAACTATTCCAACCTGTTTATCGGCTGAG  
AGGGCGTAGGAATTATATCCTTCTTGTCTCATCAGTTGATG  
ATACGCCCAGCAGATGCCAACACAGCAGCCATTCAAGCAATCCTATAACAACCGTATCGGCGATATCGGTTTATCCTCG  
CCTTAGCATGATTTATCCTACTCCAACCTCATGAGACCC  
ACAACAATAGCCCTTCTAAACGCTAATCCAAGCCTCACCCACTACTAGGCCTCCTCCTAGCAGCAGCAGGCAAATCAG  
CCCAATTAGGTCTCCACCCCTGACTCCCCTCAGCCATAGA  
AGGCCCCACCCAGTCTCAGCCCTACTCCACTCAAGCACTATAGTTGTAGCAGGAATCTTCTTACTCATCCGCTTCCACC  
CCCTAGCAGAAAATAGCCCACTAATCCAAACTCTAACACT  
ATGCTTAGGCGCTATCACCCTCTGTTTCGAGCAGTCTGCGCCCTTACACAAAATGACATCAAAAAAATCGTAGCCTTCT  
CCACTTCAAGTCAACTAGGACTCATAATAGTTACAATCGG

CATCAACCAACCACACCTAGCATTCTGACATCTGTACCCACGCCTTCTTCAAAGCCATACTATTTATGTGCTCCGGGT  
CCATCATCCACAACCTTAACAATGAACAAGATATTCGAAA  
AATAGGAGGACTACTCAAACCATACCTCTCACTTCAACCTCCCTCACCATTGGCAGCCTAGCATTAGCAGGAATACCTT  
TCCTCACAGGTTTTCTACTCCAAAGACCACATCATCGAAAC  
CGCAAACATATCATACACAAACGCCTGAGCCCTATCTATTACTCTCATCGCTACCTCCCTGACAAGCGCCTATAGCACTC  
GAATAATTCTTCTCACCCCTAACAGGTCAACCTCGCTTCCC  
CACCCCTTACTAACATTAACGAAAATAACCCCACCCTACTAAACCCCATTAACGCCTGGCAGCCGGAAGCCTATTTCGCAG  
GATTTCTCATTACTAACAACATTTCCCCCGCATCCCCCTT  
CCAAACAACAATCCCCCTCTACCTAAAACCTCACAGCCCTCGCTGTCACTTTCTTAGGACTTCTAACAGCCCTAGACCTCA  
ACTACCTAACCAACAACTTAAAATAAAATCCCCACTATG  
CACATTTTATTTCTCAACATACTCGGATTCTACCCTAGCATCACACACCGCACAAATCCCCTATCTAGGCCTTCTTACGA  
GCCAAAACCTGCCCTACTCCTCCTAGACCTAACCTGACT  
AGAAAAGCTATTACCTAAAACAATTTACAGCACCAAATCTCCACCTCCATCATCACCTCAACCCAAAAAGGCATAATTA  
AACTTTACTTCTCTCTTTCTTCTTCCACTCATCCTAAC  
CCTACTCCTAATCACATAACCTATTTCCCCGAGCAATCTCAATTACAATATATACACCAACAAACAATGTTCAACCAGTA  
ACTACTACTAATCAACGCCATAATCATACAAAGCCCCCG  
CACCAATAGGATCCTCCCGAATCAACCCTGACCCCTCTCCTTCATAAATTATTTCAGCTTCTTACACTATTAAGTTTTACC  
ACAACCACCACCCCATCATACTCTTTACCCACAGCACCA  
ATCCTACCTCCATCGCTAACCCCACTAAAACACTCACCAAGACCTCAACCCCTGACCCCATGCCTCAGGATACTCCTCA  
ATAGCCATCGCTGTAGTATATCCAAAGACAACCATCATT  
CCCCTAAATAAATTAAAAAACTATTAACCCATATAACCTCCCCAAAATTGAGAATAATAACACACCCGACCACACCG  
CTAACAATCAATACTAAACCCCATAAATAGGAGAGGGCT  
TAGAAGAAAACCCCAAAACCCCATTAATAACCCACACTCAACAGAAACAAAGCATATATCATTATTCTCGCACGGACT  
ACAACCACGACCAATGATATGAAAAACCATCGTTGTATTT  
CAACTACAAGAACACCAATGACCCCAATACGAAAATTAACCCCTAATAAAACTAATTAACCACTCATTTCATCGACCTC  
CCCACCCCATCCAACATCTCCGCATGATGAAACTTCGGCT  
CACTCCTTGGCGCCTGCCTGATCCTCCAAATCACACAGGACTATTCTAGCCATGCACTACTCACAGACGCCTCAACC  
GCCTTTTCATCAATCGCCACATCACTCGAGACGTAAAT  
ATGGCTGAATCATCCGCTACCTTCACGCCAATGGCGCCTCAATATTCTTTATCTGCCTCTTCTACACATCGGACGAGGC  
CTATATTACGGATCATTCTCTACTCAGAAACCTGAAACA  
TCGGCATTATCCTCCTGCTTGCAACTATAGCAACAGCCTTCATAGGCTATGTCTCCTCCCGTGAGGCCAAATATCATTCTGA  
GGGGCCACAGTAATTACAACTTACTATCCGCCATCCCAT  
ACATTGGGACAGACCTAGTTCAATGAATCTGAGGAGGCTACTCAGTAGACAGTCCCACCCTCACACGATTCTTTACCTTT  
CACTTCATCTTACCCTTCATTATTGCAGCCCTAGCAGCAC  
TCCACCTCCTATTCTTGACGAAACGGGATCAAACAACCCCTAGGAATCACCTCCCATTCCGATAAAATCACCTTCCAC  
CCTTACTACACAATCAAAGACGCCCTCGGCTTACTTCTCT  
TCCTTCTCTCCTTAATGACATTAACACTATTCTCACCAGACCTCCTAGGCGACCCAGACAATTATACCCTAGCCAACCC  
TTAAACACCCCTCCCCACATCAAGCCCGAATGATATTTCC  
TATTGCCTACACAATTTCTCGGATCCGTCCCTAACAACTAGGAGGCGTCTTGCCTATTACTATCCATCCTCATCCTA  
GCAATAATCCCCATCCTCCATATATCCAAACAACAAGCA  
TAATATTTGCGCCACTAAGCCAATCACTTTATTGACTCCTAGCCGACACCTCCTCATTCTAACCTGAATCGGAGGACAA  
CCAGTAAGCTACCCTTTTACCATCATTGGACAAGTAGCAT  
CCGTACTATACTTCAACAATCCTAATCCTAATACCAACTATCTCCCTAATTGAAAACAAAATACTCAAATGGGCCTGT  
CCTTGTAGTATAAACTAATACACCAGTCTTGTAACCGGA  
GATGAAAACCTTTTTCCAAGGACAAATCAGAGAAAAAGTCTTTAACTCCACCATTAGCACCCAAAGCTAAGATTCTAATT  
TAAACTATT

#ASIA Uzbek

CCACAGTTTATGTAGCTTACCTCCTCAAAGCAATACACTGAAAATGTTTGTAGACGGGCTCACATCACCCCATAAACAATA  
GGTTTGGTCTAGCCTTTCTATTAGCTCTTAGTAAGATTA  
CACATGCAAGCATCCCCGTTCCAGTGAGTTACCCTCTAAATCACCACGATCAAAGGGACAAGCATCAAGCACGCAGCA  
ATGCAGCTCAAACGCTTAGCCTAGCCACACCCCCACGGG  
AAACAGCAGTGATTAACCTTTAGCAATAAACGAAAGTTTAACTAAGCTATACTAACCCAGGGTTGGTCAATTTCTGTGCC  
AGCCACCGCGGTACACGATTAACCCAAGTCAATAGAAGC  
CGGCGTAAAGAGTGTTTTATAGTACCCCCCTCCCCAATAAAGCTAAAACCTCACCTGAGTTGTAAAAAATCCAGTTGACAC  
AAAATAGACTACGAAAGTGGCTTTAACATATCTGAACACA

CAATAGCTAAGACCCAAACTGGGATTAGATACCCCCTATGCTTAGCCCTAAACCTCAACAGTTAAACCAACAAAACCTGC  
TCGCCAGAACACTACGAGCCACAGCTTAAAACCTCAAAGGA  
CCTGGCGGTGCTTCATATCCCTCTAGAGGAGCCTGTTCTGTAATCGATAAACCCCGATCAACCTCACCACCTCTTGCTCA  
GCCTATATACCGCCATCTTCAGCAAACCCTGATGAAGGCT  
ACAAAGTAAGCGCAAGTACCCACGTAAAGACGTTAGGTCAAGGTGTAGCCCATGAGGTGGCAAGAAATGGGCTACATTTT  
CTACCCCAGAAAACCTACGATAGCCCTTATGAAACTTAAGG  
GTGCAAGGTGGATTTAGCAGTAAACTGAGAGTAGAGTGCTTAGTTGAACAGGGCCCTGAAGCGCGTACACACCGCCCGTC  
ACCCTCCTCAAGTATACTTCAAAGGACATTTAACTAAAAC  
CCCTACGCATTTATATAGAGGAGACAAGTCGTAACATGGTAAGTGTACTGGAAAGTGCACCTTGGACGAACCAGAGTGTAG  
CTTAACACAAAGCACCCAACCTTACACTTAGGAGATTTCAA  
CTTAACCTTGACCGCTCTGAGCTAAACCTAGCCCCAAACCCACTCCACCTTACTACCAGACAACCTTAGCCAAACCATTTA  
CCCAAATAAAGTATAGGCGATAGAAATTGAAACCTGGCGC  
AATAGATATAGTACCGCAAGGGAAAGATGAAAAATTATAACCAAGCATAATATAGCAAGGACTAACCCCTATACCTTCTG  
CATAATGAATTAACCTAGAAATAACTTTGCAAGGAGAGCCA  
AAGCTAAGACCCCCGAAACCAGACGAGCTACCTAAGAACAGCTAAAAGAGCACACCCCGTCTATGTAGCAAAAATAGTGGGA  
AGATTTATAGGTAGAGGCGACAAACCTACCGAGCCTGGTG  
ATAGCTGGTTGTCCAAGATAGAATCTTAGTTCAACTTTAAATTTGCCACAGAACCCTCTAAATCCCCTTGTAATTTAA  
CTGTTAGTCCAAAGAGGAACAGCTCTTTGGACACTAGGAA  
AAAACCTTGTAGAGAGAGTAAAAAA-  
TTTAACACCCATAGTAGGCCTAAAAGCAGCCACCAATTAAGAAAGCGTTCAAGCTCAACACCCACTACCTAAAAAA-  
TCCCAAACATATAACTG  
AACTCCTCACACCCAATTGGACCAATCTATCACCCCTATAGAAGAACTAATGTTAGTATAAGTAACATGAAAACATTCTCC  
TCCGCATAAGCCTGCGTCAGATTAAAAACACTGAACTGACA  
ATTAACAGCCCAATATCTACAATCAACCAACAAGTCATTATTACCCTCACTGTCAACCCAACACAGGCATGCTCATAAGG  
AAAGGTTAAAAAAGTAAAAGGAACTCGGCAAATCTTACC  
CCGCCTGTTTACCAAAAACATCACCTCTAGCATCACAGTATTAGAGGCACCGCCTGCCAGTGACACATGTTTAAACGGC  
CGCGGTACCCTAACCGTGCAAAGGTAGCATAATCACTTGT  
TCCTTAAATAGGGACCTGTATGAATGGCTCCACGAGGGTTAGCTGTCTCTTACTTTTAAACAGTGAAATTGACCTGCC  
GTGAAGAGGCGGGCATGACACAGCAAGACGAGAAGACCCCT  
ATGGAGCTTTAATTTATTAATGCAAACAGTACCTAACAACCCACAGGTCTAAACTACCAACCTGCATTAAAAATTTCC  
GGTTGGGGCGACCTCGGAGCAGAACCCAACCTCCGAGCAG  
TACATGCTAAGACTTACCAGTCAAAGCGAACTACTATACTCAATTGATCCAATAACTTGACCAACGGAACAAGTTACCC  
TAGGGATAACAGCGCAATCCTATTCTAGAGTCCATATCAA  
CAATAGGGTTTACGACCTCGATGTTGGATCAGGACATCCCGATGGTGCAGCCGCTATTAAAGGTTTCGTTTGTTCACCGAT  
TAAAGTCTACGTGATCTGAGTTCAGACCGGAGTAATCCA  
GGTCGGTTTTCTATCTACTTCAAATTCCTCCCTGTACGAAAGGACAAGAGAAATAAGGCCTACTTCACAAAGCGCCTTCCC  
CCGTAAATGATATCATCTCAACTTAGTATTATACCCACAC  
CCACCCAAGAACAGGGTTTTGTTAAGATGGCAGAGCCCGGTAATCGCATAAACTTAAACTTTACAGTCAGAGGTTCAAT  
TCCTCTTCTTAAACAACATACCCATGGCCAACCTCCTACTC  
CTCATTGTACCCATTCTAATCGCAATGGCATTCTAATGCTTACCGAACGAAAAATTCTAGGCTATATACAACCTACGCAA  
AGGCCCAACGTTGTAGGCCCTACGGGCTACTACAACCC  
TTGCTGACGCCATAAACTCTTACCAAAGAGCCCTAAAACCCGCCACATCTACCATCACCCCTCTACATCACCGCCCC  
GACCTTAGCTCTCACCATCGCTCTTCTACTATGAACCCCC  
CTCCCCATACCCAACCCCTGGTCAACCTCAACCTAGGCCTCCTATTTATTCTAGCCACCTCTAGCCTAGCCGTTTACTC  
AATCCTCTGATCAGGGTGAGCATCAAACCTCAAACCTACGCC  
CTGATCGGCGCACTGCGAGCAGTAGCCCAAACAATCTCATATGAAGTACCCTAGCCATCATTCTACTATCAACATTACT  
AATAAGTGGCTCCTTTAACCTCTCCACCCTTATCACAACA  
CAAGAACACCTCTGATTACTCCTGCCATCATGACCCTTGCCATAATATGATTTATCTCCACACTAGCAGAGACCAACCG  
AACCCCTTCGACCTTGCCGAAGGGGAGTCCGAACCTAGTC  
TCAGGCTTCAACATCGAATACGCCGAGGCCCTTCGCCCTATTCTTCATAGCCGAATACACAAACATTATTATAATAAA  
CACCCCTACCACTACAATCTTCTAGGAACAACATATGAC  
GCACTCTCCCCTGAACTCTACACAACATATTTTGTACCAAGACCCTACTTCTAACCTCCCTGTTCTTATGAATTGGAAC  
AGCATAACCCCGATTCCGCTACGACCAACTCATAACCTC  
CTATGAAAAAATTCCTACCCTCACCCCTAGCATTACTTATATGATATGTCTCCATACCCATTACAATCTCCAGCATTCC  
CCCTCAAACCTAAGAAATATGTCTGATAAAAGAGTTACTT  
TGATAGAGTAAATAATAGGAGCTTAAACCCCTTATTTCTAGGACTATGAGAATCGAACCCATCCCTGAGAATCCAAAAT  
TCTCCGTGCCACCTATCACACCCCATCCTAAAGTAAGGTC

AGCTAAATAAGCTATCGGGCCCATACCCCGAAAATGTTGGTTATACCCTTCCCGTACTAATTAATCCCCTGGCCCAACCC  
GTCATCTACTCTACCATCTTTGCAGGCACACTCATCACAG  
CGCTAAGCTCGCACTGATTTTTTACCTGAGTAGGCCTAGAAATAAACATGCTAGCTTTTTATTCCAGTTCTAACCAAAAA  
ATAAACCCCTCGTTCCACAGAAGCTGCCATCAAGTATTTCC  
TCACGCAAGCAACCGCATCCATAATCCTTCTAATAGCTATCCTCTTCAACAATATACTCTCCGGACAATGAACCATAACC  
AATACTACCAATCAATACTCATCATTATAATAATCATAATGG  
CTATAGCAATAAACTAGGAATAGCCCCCTTTCACTTCTGAGTCCCAGAGGTTACCCAAGGCACCCCTCTGACATCCGGC  
CTGCTTCTTCTCACATGACAAAACTAGCCCCCATCTCAA  
TCATATACCAAATCTCTCCCTCACTAAACGTAAGCCTTCTCCTCACTCTCTCAATCTTATCCATCATAGCAGGCAGTTGA  
GGTGGATTAAACCAAACCCAGCTACGCAAAATCTTAGCAT  
ACTCCTCAATTACCCACATAGGATGAATAATAGCAGTTCTACCGTACAACCCTAACATAACCATTCTTAATTTAACTATT  
TATATTATCCTAACTACCACCGCATTCTACTACTCAACT  
TAAACTCCAGCACCACGACCCTACTACTATCTCGCACCTGAAACAAGCTAACATGACTAACACCCTTAATTCCATCCACC  
CTCCTCTCCCTAGGAGGCCTGCCCCGCTAACCGGCTTTT  
TGCCCAAATGGGCCATTATCGAAGAATTCACAAAAACAATAGCCTCATCATCCCCACCATCATAGCCACCATCACCCCTC  
CTTAACCTCTACTTCTACCTACGCCTAATCTACTCCACCT  
CAATCACACTACTCCCCATATCTAACAACGTAAAAATAAAATGACAGTTTGAACATACAAAACCCACCCCATCTCCCC  
ACACTCATCGCCCTTACCACGCTACTCCTACCTATCTCCC  
CTTTTATACTAATAATCTTATAGAAATTTAGGTTAAATACAGACCAAGAGCCTTCAAAGCCCTCAGTAAGTTGCAATACT  
TAATTTCTGTAACAGCTAAGGACTGCAAAAACCCACTCTG  
CATCAACTGAACGCAAATCAGCCACTTTAATTAAGCTAAGCCCTTACTAGACCAATGGGACTTAAACCCACAAACTTA  
GTTAACAGCTAAGCACCTAATCAACTGGCTTCAATCTAC  
TTCTCCCGCCGCGGGGAAAAAAGGCGGGGAGAAGCCCGGCAGGTTTGAAGCTGCTTCTTCGAATTTGCAATTCATATGA  
AAATCACCTCGGAGCTGGTAAAAAGAGGCCTAACCCCTGT  
CTTTAGATTTACAGTCCAATGCTTCACTCAGCCATTTTACCTCACCCCC-  
ACTGATGTTCCGCCGACCGTTGACTATTCTCTACAAACCACAAAGACATTGGAACACTATACCTATTATTC  
GGCGCATGAGCTGGAGTCTTAGGCACAGCTCTAAGCCTCCTTATTCGAGCCGAGCTGGGCCAGCCAGGCAACCTTCTAGG  
TAACGACCACATCTACAACGTTATCGTACAGCCCATGCA  
TTTGTAAATAATCTTCTTATAGTAATACCCATCATAATCGGAGGCTTTGGCAACTGACTAGTTCCCCTAATAATCGGTGC  
CCCCGATATGGCGTTTCCCCGCATAAACAACATAAGCTTC  
TGACTCTTACCTCCCTCTCTCCTACTCCTGCTCGCATCTGCTATAGTGGAGGCCGAGCAGGAACAGGTTGAACAGTCTA  
CCCTCCCTTAGCAGGGAECTACTCCACCCTGGAGCCTCC  
GTAGACCTAACCATCTTCTCCTTACACCTAGCAGGTGTCTCCTCTATCTTAGGGGCCATCAATTTTCATCACAACAATTAT  
CAATATAAAACCCCTGCCATAACCCAATACCAAACGCC  
CTCTTCGTCTGATCCGTCTAATCACAGCAGTCTACTTCTCCTATCTCTCCAGTCTTAGCTGCTGGCATCACTATACT  
ACTAACAGACCGCAACCTCAACACCACCTTCTTCGACCCC  
GCCGGAGGAGGAGACCCATTCTATACCAACACCTATTCTGATTTTTTCGGTCACCCTGAAGTTTATATTCTTATCCTACC  
AGGCTTCGGAATAATCTCCCATATTGTAACCTTACTACTCC  
GGAAAAAAGAACCATTTGGATACATAGGTATGGTCTGAGCTATGATATCAATTGGCTTCTTAGGTTTATCGTGTGAGC  
ACACCATATATTTACAGTAGGAATAGACGTAGACACACGA  
GCATATTTACCTCCGCTACCATAATCATCGCTATCCCCACCGCGTCAAAGTATTTAGCTGACTCGCCCACTCCACGG  
AAGCAATATGAAATGATCTGCTGCAGTCTCTGAGCCCTA  
GGATTCATCTTTCTTTTACCCTAGGTGGCCTGACTGGCATTGTATTAGCAAACCTCATCACTAGACATCGTACTACACGA  
CACGTACTACGTTGTAGCTCACTTCCACTATGTCCTATCA  
ATAGGAGCTGTATTTGCCATCATAGGAGGCTTCACTTCACTGATTTCCCCTATTCTCAGGCTACACCCTAGACCAAACCTA  
CGCCAAAATCCATTTCACTATCATATTCATCGGCCTAAAT  
CTAACTTTCTTCCCACAACACTTTCTCGGCCTATCCGGAATGCCCCGACGTTACTCGGACTACCCCGATGCATACACCAC  
ATGAAACATCCTATCATCTGTAGGCTCATTCAATTTCTCTA  
ACAGCAGTAATATTAATAATTTTTCATGATTTGAGAAGCCTTCGCTTCGAAGCGAAAAGTCTAATAGTAGAAGAACCCTC  
CATAAACCTGGAGTGACTATATGGATGCCCCCACCCTAC  
CACACATTCGAAGAACCCGTATACATAAAATCTAGACAAAAAGGAAGGAATCGAACCCCCCAAAGCTGGTTTTCAAGCCA  
ACCCCATGGCCTCCATGACTTTTTTCAAAAAGGTATTAGAA  
AAACCATTTCATAACTTTGTCAAAGTTAAATTATAGGCTAAATCCTATATATCTTAATGGCACATGCAGCGCAAGTAGGT  
CTACAAGACGCTACTTCCCCTATCATAGAAGAGCTTATCA  
CCTTTTCATGATCACGCCCTCATAATCATTTTTCTTATCTGCTTCTTAGTCCTGTATGCCCTTTTCTTAACACTCACAACA  
AAACTAATAACTAATCACTCAGACGCTCAGGAAATAG

AAACCGTCTGAACTATCCTGCCCCGCATCATCCTAGTCTCATCGCCCTCCCATCCCTACGCATCCTTTACATAACAGAC  
GAGGTCAACGATCCCTCCCTTACCATCAAATCAATTGGCC  
ACCAATGGTACTGAACCTACGAGTACACCGACTACGGCGGACTAATCTTCAACTCCTACATACTTCCCCATTATTCTTA  
GAACCAGGCGACCTGCGACTCCTTGACGTTGACAATCGAG  
TAGTACTCCCGATTGAAGCCCCCATTTCGTATAATAATTACATCACAAGACGTCTTGCCTCATGAGCTGTCCCCACATTA  
GGCTTAAAAACAGATGCAATTTCCCGGACGTCTAAACAAA  
CCACTTTACCGCTACACGACCGGGGTATACTACGGTCAATGCTCTGAAATCTGTGGAGCAAACCACAGTTTCATGCC  
ATCGTCTAGAATTAATTCCCCTAAAAATCTTTGAAATAG  
GGCCCGTATTTACCCTATAGCACCCCTCTA-----  
GAGCCCACTGTAAAGCTAAGCTTAGCATTAACTTTTTAAGTTAAAGATTAAGAGAACCAACACCTCTTTACAGTGAATGC  
CCCAACTAAATACTACCGTATGGCCACCATAATTACCCCTACTCCTTACACTATTCTCATCACCAACTAAAAATA  
TTAAACACAAACTACCACCTACCTCCCTCACCAAAGCCCA  
TAAAAATAAAAAATTATAACAAACCCTGAGAACCAAAATGAACGAAAATCTGTTGCTTTCATTATTGCCCCACAAATCC  
TAGGCCTACCCGCGCAGTACTGATCATTCTATTTCCCC  
TCTATTGATCCCCACCTCCAAATATCTCATCAACAACCGACTAATCACCACCAACAATGACTAATCAAACCTAACCTCAA  
AACAAATGATAACCATAACAACTAAAGGACGAACCTG  
ATCTCTTATACTAGTATCCTTAATCATTTTTTATTGCCACAACCTAACCTCCTCGGACTCCTGCCTCACTCATTTACACCA  
CCACCCAACTATCTATAAACCTAGCCATGGCCATCCCCTT  
ATGAGCGGGCGCAGTGATTATAGGCTTTGCTCTAAGATTAATAATGCCCCTAGCCACTTCTTACCACAAGGCACACCTA  
CACCCCTTATCCCATACTAGTTATTATCGAAACCATCAG  
CCTACTCATTCAACCAATAGCCCTGGCCGTACGCCTAACCGCTAACATTACTGCAGGCCACCTACTCATGCACCTAATTG  
GAAGCGCCACCCTAGCAATATCAACCATTAACCTTCCCTC  
TACACTTATCATCCTCACAATTCTAATTCTACTGACTATCCTAGAAATCGCTGTGCGCTTAATCCAAGCCTACGTTTTCA  
CACTTCTAGTAAGCCTCTACCTGCACGACAACACATAATG  
ACCCACCAATCACATGCCTATCATATAGTAAACCCAGCCCATGACCCCTAACAGGGGCCCTCTCAGCCCTCCTAATGAC  
CTCCGGCCTAGCCATGTGATTTCACTTCCACTCCATAACG  
CTCCTCATACTAGGCCTACTAACCAACACACTAACCATATACCAATGATGGCGCGATGTAACACGAGAAAGCACATACCA  
AGGCCACCACACACCACCTGTCCAAAAAGGCCTTCGATAC  
GGGATAATCCTATTTATTACCTCAGAAGTTTTTTTTCTTGCAGGATTTTTTCTGAGCCTTTTACCCTCCAGCCTAGCCCC  
TACCCCCCAATTAGGAGGGCACTGGCCCCCAACAGGCATC  
ACCCCGCTAAATCCCCTAGAAGTCCCACTCCTAAACACATCCGTATTACTCGCATCAGGAGTATCAATCACCTGAGCTCA  
CCATAGTCTAATAGAAAACAACCGAAACCAATAATTCAA  
GCACTGCTTATTACAATTTTACTGGGTCTCTATTTTACCCTCCTACAAGCCTCAGAGTACTTTCAGTCTCCCTTACCAT  
TTCCGACGGCATCTACGGCTCAACATTTTTTTGTAGCCACA  
GGCTTCCACGGACTTCACGTCAATTATTGGCTCAACTTTTCTCCTACTATCTGCTTCATCCGCCAACTAATATTTCACTTTAC  
ATCCAAACATCACTTTGGCTTCGAAGCCGCCGCTGATAC  
TGGCATTGTTGTAGATGTGGTTTACTATTTCTGTATGTCTCCATCTATTGATGAGGGTCTTACTCTTTTAGTATAAATAG  
TACCGTTAACTTCCAATTAAGTATTTTGGACAACATTCAA  
AAAAGAGTAATAAACTTCGCCTTAATTTTAATAATCAACACCCTCCTAGCCTTACTACTAATAATTATTACATTTTACT  
ACCACAACCTCAACGGCTACATAGAAAAATCCACCCCTTAC  
GAGTGCAGGCTTCGACCCTATATCCCCCGCCGCGTCCCTTTCTCCATAAAATTTCTTCTTAGTAGCTATTACCTTCTTATT  
ATTTGATCTAGAAATTGCCCTCCTTTTACCCTTACCATGA  
GCCCTACAAACAACCTAACCTGCCACTAATAGTTATGTCATCCCTCTTATTAATCATCATCCTAGCCCTAAGTCTGGCCTA  
TGAGTGACTACAAAAAGGATTAGACTGAACCGAATTGGTA  
TATAGTTTAAACAAAACGAATGATTTGACTCATTAAATTATGATAATCATATTTACCAATGCCCTCATTACATAAA  
TATTATACTAGCATTTACCATCTCACTTCTAGGAATACTA  
GTATATCGCTCACACCTCATATCCTCCCTACTATGCCTAGAAGGAATAATACTATCGCTGTTTATTATAGCTACTCTCAT  
AACCTCAACACCCACTCCCTCTTAGCCAATATTGTGCCT  
ATTGCCATACTAGTCTTTGCCGCTGCGAAGCAGCGGTGGGCTAGCCCTACTAGTCTCAATCTCCAACACATATGGCCT  
AGACTACGTACATAACCTAAACCTACTCCAATGCTAAAAC  
TAATCGTCCCAACAATTATATTACTACCCTGACATGACTTTCCAAAAACACATAATTTGAATCAACACAACCACCCAC  
AGCCTAATTATTAGCATCATCCCTCTACTATTTTTTTAACC  
AAATCAACAACAACCTATTTAGCTGTTCCCAACCTTTTCTCCGACCCCTAACACCCCTCCTAATACTAACTACC  
TGACTCCTACCCCTCACAATCATGGCAAGCCAACGCCACT  
TATCCAGTGAACCACTATCACGAAAAAACTCTACCTCTCTATACTAATCTCCCTACAAATCTCCTTAATTATAACATTC  
ACAGCCACAGAATAATCATATTTTTATATCTTCTTCGAAA

CCACACTTATCCCCACCTTGGCTATCATCACCCGATGAGGCAACCAGCCAGAACGCCTGAACGCAGGCACATACTTCCTA  
TTCTACACCCTAGTAGGCTCCCTTCCCCTACTCATCGCAC  
TAATTTACACTCACAACACCCTAGGCTCACTAAACATTCTACTACTACTCTACTGCCCCAAGAACTATCAAACCTCCTGA  
GCCAACAACTTAATATGACTAGCTTACACAATAGCTTTTA  
TAGTAAAGATACCTCTTTACGGACTCCACTTATGACTCCCTAAAGCCCATGTGGAAGCCCCCATCGCTGGGTCAATAGTA  
CTTGCCCGAGTACTCTTAAACTAGGCGGCTATGGTATAA  
TACGCCTCACACTCATTCTCAACCCCTGACAAAACACATAGCCTACCCCTTCCCTGTACTATCCCTATGAGGCATAATT  
ATAACAAGCTCCATCTGCCTACGACAAAACAGACCTAAAAT  
CGCTCATTGCATACTCTTCAATCAGCCACATAGCCCTCGTAGTAACAGCCATTCTCATCCAAACCCCTGAAGCTTCACC  
GGCGCAGTCACTCTCATAATCGCCCACGGACTTACATCCT  
CATTACTATTCTGCCTAGCAAACCTCAAACGACATCAGAGTGCATCATAATCCTCTCTCAAGGACTTCAAACCT  
CTACTCCCCTAATAGCTTTTTGATGACTTCTAGCAAGCC  
TCGCTAACCTCGCCTTACCCCTACTATTAACCTACTGGGAGAAGCTCTCTGTGCTAGTAACCACGTTCTCCTGATCAAAT  
ATCACTCTCCTACTTACAGGACTCAACATACTAGTCACAG  
CCCTATACTCCCTCTACATATTTACCACAACACAATGGGGCTCACTCACCCACCACATTAACAACATAAAAACCCCTCATT  
ACACGAGAAAACACCCTCATGTTTACACCTATCCCCCA  
TTCTCCTCCTATCCCTCAACCCCGACATCATTACCGGGTTTTCTCTGTAAATATAGTTTTAACAAAACATCAGATTGT  
GAATCTGACAACAGAGGCTTACGACCCCTTATTTACCGAG  
AAAGCTCACAAGAAGTCTAACTCATGCCCCCATGTCTAACAACATGGCTTTCTCAACTTTTAAAGGATAACAGCTATCC  
ATTGGTCTTAGGCCCAAAAATTTTGGTGCAACTCCAAAT  
AAAAGTAATAACCATGCACACTACTATAACCACCCTAACCCCTGACTTCCCTAATTCCCCCATCCTTACCACCCTCGTTA  
ACCCTAACAAAAAACTCATACCCCTATTATGTAAAATC  
CATTGTGCATCCACCTTTATTATCAGTCTCTTCCCCACAACAATATTCATGTGCCTAGACCAAGAAGTTATTATCTCGA  
ACTGACACTGAGCCACAACCCAAACAACCCAGCTCTCCCT  
AAGCTTCAAACCTAGACTACTTCTCCATAATATTCATCCCTGTAGCATTGTTGTTACATGGTCCATCATAGAATTCTCAC  
TGTGATATATAAACTCAGACCCAAACATTAATCAGTTCTT  
CAAATATCTACTCATCTTCCCTAATTACCATACTAATCTTAGTTACCGCTAACAACTATTCCAACCTGTTTATCGGCTGAG  
AGGGCGTAGGAATTATATCCTTCTTGTCTCATCAGTTGATG  
ATACGCCCGAGCAGATGCCAACACAGCAGCCATTCAAGCAATCCTATACAACCGTATCGGCGATATCGGTTTTATCCTCG  
CCTTAGCATGATTTATCCTACACTCCAACCTCATGAGACCC  
ACAACAAATAGCCCTTCTAAACGCTAATCCAAGCCTCACCCACTACTAGGCCCTCCTCCTAGCAGCAGCAGGCAAATCAG  
CCCAATTAGGTCTCCACCCCTGACTCCCCTCAGCCATAGA  
AGGCCCCACCCAGTCTCAGCCCTACTCCACTCAAGCACTATAGTTGTAGCAGGAATCTTCTTACTCATCCGCTTCCACC  
CCCTAGCAGAAAATAGCCCACTAATCCAAACTCTAACACT  
ATGCTTAGGCGCTATCACCACTCTGTTGCGCAGCAGTCTGCGCCCTTACACAAAATGACATCAAAAAAATCGTAGCCTTCT  
CCACTTCAAGTCAACTAGGACTCATAATAGTTACAATCGG  
CATCAACCAACCACACCTAGCATTCTGCACATCTGTACCCACGCCTTCTTCAAAGCCATACTATTTATGTGCTCCGGGT  
CCATCATCCACAACCTTAACAATGAACAAGATATTCGAAA  
AATAGGAGGACTACTCAAACCATACCTCTCACTTCAACCTCCCTCACCAATTGGCAGCCTAGCATTAGCAGGAATACCTT  
TCCTCACAGTTTTCTACTCCAAAGACCACATCATCGAAAC  
CGCAAACATATCATACACAAACGCCTGAGCCCTATCTATTACTCTCATCGCTACCTCCCTGACAAGCGCCTATAGCACTC  
GAATAATTCTTCTCACCCCTAACAGGTCAACCTCGCTTCCC  
CACCCCTACTAACATTAACGAAAATAACCCCAACCTACTAAACCCCATTAACGCCTGGCAGCCGGAAGCCTATTTCGCAG  
GATTTCTCATTACTAACAACATTTCCCCCGCATCCCCCTT  
CCAAACAACAATCCCCCTTACCTAAAACCTCACAGCCCTCGCTGTCACTTTCTTAGGACTTCTAACAGCCCTAGACCTCA  
ACTACCTAACCAACAACTTAAAATAAAATCCCCACTATG  
CACATTTTATTTCTCAACATACTCGGATTTACCCCTAGCATCACACACCGCACAAATCCCTTATCTAGGCCCTTCTTACGA  
GCCAAAACCTGCCCTACTCCTCCTAGACCTAACCTGACT  
AGAAAAGCTATTACCTAAAACAATTTTACAGCACCAAATCTCCACCTCCATCATCACCTCAACCCAAAAAGGCATAATCA  
AACTTTACTTCTCTCTTTCTTCTTCCACTCATCCTAAC  
CCTACTCCTAATCACATAACCTATTTCCCCGAGCAATCTCAATTACAATATATACACCAACAAACAATGTTCAACCAGTG  
ACTACTACTAATCAACGCCATAATCATACAAAGCCCCCG  
CACCAATAGGATCCTCCCGAATCAACCCTGACCCCTCTCCTTACATAAATTATTCAGCTTCTTACACTATCAAAGTTTTACC  
ACAACCACCACCCCATCATACTCTTTTACCCACAGCACCA  
ATCCTACCTCCATCGCTAACCCCACTAAAACACTCACCAAGACCTCAACCCCTGACCCCATGCCTCAGGATACTCCTCA  
ATAGCCATCGCTGTAGTATATCCAAAGACAACCATCATT

CCCCTAAATAAATTAATAAAAACTATTAAACCCATATAACCTCCCCAAAATTTCAGAATAATAACACACCCGACCACACCG  
CTAACAAATCAATACTAAACCCCCATAAATAGGAGAAGGCT  
TAGAAGAAAACCCCAAAACCCCATTAATAAACCCACACTCAACAGAAACAAAGCATAACATCATTATTCTCGCACGGACT  
ACAACCACGACCAATGATATGAAAAACCATCGTTGTATTT  
CAACTACAAGAACACCAATGACCCCAATACGCAAAATTAACCCCTAATAAAAATTAATTAACCACTCATTTCATCGACCTC  
CCCACCCCATCCAACATCTCCGCATGATGAAACTTCGGCT  
CACTCCTTGGCGCCTGCCTGATCCTCCAAATCACCACAGGACTATTCTAGCCATGCACTACTCACCAGACGCCTCAACC  
GCCTTTTCATCAATCGCCACATCACTCGAGACGTAAATT  
ATGGCTGAATCATCCGCTACCTTCACGCCAATGGCGCCTCAATATTCTTTATCTGCCTCTTCTACACATCGGGCGAGGC  
CTATATTACGGATCATTCTCTACTCAGAAACCTGAAACA  
TCGGCATTATCCTCCTGCTTGCAACTATAGCAACAGCCTTCATAGGCTATGTCCTCCCGTGAGGCCAAATATCATTCTGA  
GGGGCCACAGTAATTACAAACTTACTATCCGCCATCCCAT  
ACATTGGGACAGACCTAGTTCAATGAATCTGAGGAGGCTACTCAGTAGACAGTCCCACCCTCACACGATTCTTTACCTTT  
CACTTCATCTTGCCCTTCATTATTGCAGCCCTAGCAGCAC  
TCCACCTCCTATTCTTACACGAAACGGGATCAAACAACCCCTAGGAATCACCTCCCATTCCGATAAAAATCACCTTCCAC  
CCTTACTACACAATCAAAGACGCCCTCGGCTTACTTCTCT  
TCCTTCTCTCCTTAATGACATTAACACTATTCTCACCAGACCTCCTAGGCGACCCAGACAATTATACCCTAGCCAACCC  
TTAAACACCCCTCCCCACATCAAGCCCGAATGATATTTCC  
TATTGCCTACACAATTCTCCGATCCGTCCCTAACAACTAGGAGGCGTCTTGCCCTATTACTATCCATCCTCATCCTA  
GCAATAATCCCCATCCTCCATATATCCAAACAACAAAGCA  
TAATATTTTGGCCACTAAGCCAATCACTTTATTGACTCCTAGCCGAGACCTCCTCATTCTAACCTGAATCGGAGGACAA  
CCAGTAAGCTACCCTTTTACCATCATTGGACAAGTAGCAT  
CCGTACTATACTTCAACAATCCTAATCCTAATACCAACTATCTCCCTAATTGAAAACAAAATACTCAAATGGGCCTGT  
CCTTGTAGTATAAACTAATACACCAGTCTTGTAACCGGA  
GATGAAAACCTTTTTCCAAGGACAAATCAGAGAAAAAGTCTTTAACTCCACCATTAGCACCCAAAGCTAAGATTCTAATT  
TAAACTATT
